# Supplementary material for: Adipose-Derived Mesenchymal Stem Cells Enhance Ovarian Cancer Growth and Metastasis by Increasing Thymosin Beta 4X-Linked Expression
Source: Stem Cells Int. 2019 Oct 20;2019:9037197. doi: 10.1155/2019/9037197 (PMC6855023; doi:10.1155/2019/9037197)
Supplement: Supplementary 2 — Table S1: list of the differentially expressed proteins of SKOV3 cells induced by ADSC-conditioned medium. [file 9037197.f2.xlsx]

## Sheet: A VS B
Accession		Gene Name	Description	Coverage	# Peptides	# PSMs	# Unique Peptides	# AAs	MW [kDa]	calc. pI	ADSCs A1	ADSCs A2	ADSCs A3	NC B1	NC B2	NC B3	Average A	Average B	A/B	P value
A2VCK8		TMSB4X	Thymosin beta 4, X-linked OS=Homo sapiens GN=TMSB4X PE=2 SV=1	47.7273	3	3	2	44	5.05	5.06	125.8	153.1	159.1	64.9	45.7	51.4	146	54	2.7037	0.00142395
P63313	2884	TMSB10	Thymosin beta-10 OS=Homo sapiens GN=TMSB10 PE=1 SV=2	63.6364	5	16	4	44	5.023	5.36	149	142.1	146.2	65.7	46.6	50.5	145.767	54.2667	2.68612	0.000119717
B1AJZ9		FHAD1	Forkhead-associated domain-containing protein 1 OS=Homo sapiens GN=FHAD1 PE=2 SV=2	0.566572	1	1	1	1412	161.804	6.95	161.6	131	139	59.8	53.7	54.9	143.867	56.1333	2.56295	0.000718858
B4DRB1			cDNA FLJ50735, highly similar to Calsyntenin-3 OS=Homo sapiens PE=2 SV=1	1.56904	1	1	1	956	106.03	5.5	159.8	142.4	128.1	73.5	58.9	37.3	143.433	56.5667	2.53565	0.00338612
Q9BY12		SCAPER	S phase cyclin A-associated protein in the endoplasmic reticulum OS=Homo sapiens GN=SCAPER PE=1 SV=2	0.571429	1	1	1	1400	158.188	7.44	158.2	126.5	143	60.6	59	52.7	142.567	57.4333	2.4823	0.000846092
Q8IY33		MICALL2	MICAL-like protein 2 OS=Homo sapiens GN=MICALL2 PE=1 SV=1	1.88053	1	10	1	904	97.442	9.57	151.6	127.5	147.1	66.8	59.2	47.8	142.067	57.9333	2.45224	0.000804032
Q9Y4F3		MARF1	Meiosis regulator and mRNA stability factor 1 OS=Homo sapiens GN=MARF1 PE=1 SV=6	0.401837	1	1	1	1742	192.737	7.87	153.7	129.8	138.3	53.4	60.8	63.9	140.6	59.3667	2.36833	0.000446764
Q9UK12		ZNF222	Zinc finger protein 222 OS=Homo sapiens GN=ZNF222 PE=2 SV=2	1.55211	1	1	1	451	52.45	8.63	144.4	145.7	126.8	71.9	50.4	60.7	138.967	61	2.27814	0.000857802
J3QRZ1		NDEL1	Nuclear distribution protein nudE-like 1 (Fragment) OS=Homo sapiens GN=NDEL1 PE=1 SV=1	6.63265	1	1	1	196	21.125	8.62	167.4	127.5	120.8	83	53.1	48.1	138.567	61.4	2.25679	0.0132009
B2R6V9			cDNA, FLJ93141, highly similar to Homo sapiens coagulation factor XIII, A1 polypeptide (F13A1), mRNA OS=Homo sapiens PE=2 SV=1	1.0929	1	1	1	732	83.189	6	144.6	126.6	139.4	66.3	67.1	55.9	136.867	63.1	2.16904	0.000333767
A0A158RFU5		FAM27E3	Family with sequence similarity 27, member E3 OS=Homo sapiens GN=FAM27E3 PE=2 SV=1	6.19469	1	1	1	113	13.499	11.88	150.2	117.2	142.8	74.4	56.4	59.1	136.733	63.3	2.16008	0.00304845
D9ZGG2		VTN	Vitronectin OS=Homo sapiens GN=VTN PE=4 SV=1	4.81172	2	4	2	478	54.271	5.8	155.5	138.2	116.2	85.4	49.6	55	136.633	63.3333	2.15737	0.0100013
A0A0C4DGB5		CAST	Calpastatin OS=Homo sapiens GN=CAST PE=1 SV=1	41.1141	21	28	1	754	80.95	5.1	131.2	138.1	139.4	66	65.2	60.1	136.233	63.7667	2.13643	2.10117e-05
P56715		RP1	Oxygen-regulated protein 1 OS=Homo sapiens GN=RP1 PE=1 SV=1	0.324675	1	1	1	2156	240.511	5.8	145.9	126	136.8	67.9	67.8	55.6	136.233	63.7667	2.13643	0.000506215
P15121		AKR1B1	Aldose reductase OS=Homo sapiens GN=AKR1B1 PE=1 SV=3	67.4051	20	118	19	316	35.83	6.98	131.8	131.8	144	62.3	64.6	65.6	135.867	64.1667	2.1174	6.79167e-05
Q5BKX8		CAVIN4	Caveolae-associated protein 4 OS=Homo sapiens GN=CAVIN4 PE=1 SV=2	2.1978	1	5	1	364	41.874	8.28	141.6	130.8	132	78.7	63.9	53	134.8	65.2	2.06748	0.00105346
Q9NUU7		DDX19A	ATP-dependent RNA helicase DDX19A OS=Homo sapiens GN=DDX19A PE=1 SV=1	63.1799	24	41	3	478	53.941	6.58	127.2	124.9	147.8	78.3	57.4	64.4	133.3	66.7	1.9985	0.00220144
B2R9M7			Protein kinase C epsilon type OS=Homo sapiens PE=2 SV=1	2.44233	2	4	1	737	83.63	7.12	134.8	135	129.8	76.7	71	52.7	133.2	66.8	1.99401	0.000869982
Q08AG5		ZNF844	Zinc finger protein 844 OS=Homo sapiens GN=ZNF844 PE=1 SV=1	1.05105	1	1	1	666	76.883	8.9	142.6	126.7	129.9	67.2	72.5	61.1	133.067	66.9333	1.98805	0.000352937
B4DX70			cDNA FLJ58334, highly similar to Zinc finger MYND domain-containing protein 12 OS=Homo sapiens PE=2 SV=1	5.4902	1	3	1	255	28.761	6.16	144.4	110	143.2	53.6	85.2	63.6	132.533	67.4667	1.96443	0.0112661
I3L3X0		ZG16B	Zymogen granule protein 16 homolog B (Fragment) OS=Homo sapiens GN=ZG16B PE=1 SV=1	10.5263	1	1	1	95	10.337	8.51	141.3	123.3	130.9	67.5	66.5	70.4	131.833	68.1333	1.93493	0.000284289
Q8N9Q2		SREK1IP1	Protein SREK1IP1 OS=Homo sapiens GN=SREK1IP1 PE=1 SV=1	5.16129	2	3	2	155	18.166	9.85	122.7	131.3	140.2	85.4	52.9	67.5	131.4	68.6	1.91545	0.0041656
Q9UFH2		DNAH17	Dynein heavy chain 17, axonemal OS=Homo sapiens GN=DNAH17 PE=1 SV=2	0.468227	3	4	2	4485	511.46	5.77	132.1	129.1	130.7	70.3	67.2	70.6	130.633	69.3667	1.88323	1.58445e-06
P02795		MT2A	Metallothionein-2 OS=Homo sapiens GN=MT2A PE=1 SV=1	67.2131	4	15	2	61	6.037	7.83	114.6	134.4	141	74.9	62.2	73	130	70.0333	1.85626	0.00248989
A0A024R652		MTHFD1	Methylenetetrahydrofolate dehydrogenase (NADP+ dependent) 1, methenyltetrahydrofolate cyclohydrolase, formyltetrahydrofolate synthetase, isoform CRA_a OS=Homo sapiens GN=MTHFD1 PE=3 SV=1	55.508	46	102	4	935	101.467	7.18	126	124	139.9	75.5	64.7	69.9	129.967	70.0333	1.85578	0.000526371
O60566		BUB1B	Mitotic checkpoint serine/threonine-protein kinase BUB1 beta OS=Homo sapiens GN=BUB1B PE=1 SV=3	0.761905	1	1	1	1050	119.47	5.27	137.3	121.7	130.7	69.1	71.7	69.5	129.9	70.1	1.85307	0.000200793
Q6DN14		MCTP1	Multiple C2 and transmembrane domain-containing protein 1 OS=Homo sapiens GN=MCTP1 PE=2 SV=2	0.700701	1	1	1	999	111.555	8.15	132.2	137.2	116.9	75.9	71	66.7	128.767	71.2	1.80852	0.000985117
A0A090N8Y6		GHRHR	Growth hormone releasing hormone receptor OS=Homo sapiens GN=GHRHR PE=3 SV=1	1.65485	1	2	1	423	47.371	6.73	144.6	112.7	128.1	67.8	75.4	71.3	128.467	71.5	1.79674	0.0038442
Q9Y3A0		COQ4	Ubiquinone biosynthesis protein COQ4 homolog, mitochondrial OS=Homo sapiens GN=COQ4 PE=1 SV=3	5.28302	1	1	1	265	29.639	9.17	132.8	104.4	148.3	83.7	52.6	78.3	128.5	71.5333	1.79637	0.0237642
Q8N283		ANKRD35	Ankyrin repeat domain-containing protein 35 OS=Homo sapiens GN=ANKRD35 PE=2 SV=2	0.699301	1	1	1	1001	109.898	6.02	134.2	119.3	130.3	81.7	70.8	63.7	127.933	72.0667	1.77521	0.00124925
A7UJ17			DnaJ OS=Homo sapiens PE=2 SV=1	46.473	11	23	1	241	26.899	7.55	133.7	115.7	134.2	100.4	50.9	65	127.867	72.1	1.77346	0.0248879
Q96CP2		FLYWCH2	FLYWCH family member 2 OS=Homo sapiens GN=FLYWCH2 PE=1 SV=1	24.2857	1	1	1	140	14.555	8.46	123.6	116.3	142.8	69.1	70.1	78.1	127.567	72.4333	1.76116	0.00278796
A6NDU8		C5orf51	UPF0600 protein C5orf51 OS=Homo sapiens GN=C5orf51 PE=1 SV=1	10.5442	1	3	1	294	33.599	5.26	133.7	123.3	124.9	78.2	74.3	65.7	127.3	72.7333	1.75023	0.000372364
A8K141		CTNNA3	Catenin (Cadherin-associated protein), alpha 3, isoform CRA_a OS=Homo sapiens GN=CTNNA3 PE=2 SV=1	3.46369	2	2	1	895	99.773	6.16	129.1	120.7	131.6	79.5	72.7	66.3	127.133	72.8333	1.74554	0.000420554
Q86Y91		KIF18B	Kinesin-like protein KIF18B OS=Homo sapiens GN=KIF18B PE=1 SV=3	1.96759	1	1	1	864	94.164	8.79	135.1	122.2	124	107.2	50.4	61.2	127.1	72.9333	1.74269	0.0387736
P50238		CRIP1	Cysteine-rich protein 1 OS=Homo sapiens GN=CRIP1 PE=1 SV=3	61.039	4	5	4	77	8.527	8.75	112.2	137	131	75.4	72.2	72.2	126.733	73.2667	1.72975	0.00209464
A0A024R0N6		SPTBN4	Spectrin beta chain OS=Homo sapiens GN=SPTBN4 PE=3 SV=1	1.67707	5	10	1	2564	288.838	6.01	129.2	126.3	124.6	70.8	70.1	79.1	126.7	73.3333	1.72773	7.45439e-05
H0Y858			Uncharacterized protein (Fragment) OS=Homo sapiens PE=4 SV=1	5.39629	6	11	1	1186	133.548	8.09	132.2	122.4	124.6	66.3	85.9	68.5	126.4	73.5667	1.71817	0.00154078
B4DYC6			cDNA FLJ60958, highly similar to Homo sapiens SGT1, suppressor of G2 allele of SKP1 (SUGT1), mRNA OS=Homo sapiens PE=2 SV=1	50.9025	12	17	2	277	31.669	5.5	122.7	117.8	138.7	81	74.6	65.2	126.4	73.6	1.71739	0.0024877
C0JYY2		APOB	Apolipoprotein B (Including Ag(X) antigen) OS=Homo sapiens GN=APOB PE=4 SV=1	0.854701	4	7	4	4563	515.236	7.05	126.2	132.5	118.7	81.9	67.2	73.5	125.8	74.2	1.69542	0.000902389
Q53HE6			HSPC163 protein variant (Fragment) OS=Homo sapiens PE=2 SV=1	14.3885	1	3	1	139	16.01	6.98	138.4	117.5	121.5	80.2	76.3	66.1	125.8	74.2	1.69542	0.00253196
H2BNB9			ETV6/INO80D fusion protein OS=Homo sapiens PE=2 SV=1	6.21547	2	2	2	724	78.967	6.48	119.8	129.2	127.5	78.1	64.3	81	125.5	74.4667	1.68532	0.000987773
E9PL71		EEF1D	Elongation factor 1-delta (Fragment) OS=Homo sapiens GN=EEF1D PE=1 SV=1	51.3369	9	32	1	187	20.806	5.01	142.3	99.4	134.7	83	72	68.6	125.467	74.5333	1.68336	0.0215632
V9GY25		PFKP	ATP-dependent 6-phosphofructokinase, platelet type (Fragment) OS=Homo sapiens GN=PFKP PE=1 SV=1	54.2373	6	25	1	118	12.94	7.25	114.2	117.1	144.4	57.1	79.7	87.6	125.233	74.8	1.67424	0.0190895
A0A024R2A8		MAGED4	Melanoma antigen family D, 4, isoform CRA_d OS=Homo sapiens GN=MAGED4 PE=4 SV=1	3.37382	1	1	1	741	81.327	6.79	112	128.1	134.8	80.1	69.7	75.3	124.967	75.0333	1.66548	0.00251845
Q6DT37		CDC42BPG	Serine/threonine-protein kinase MRCK gamma OS=Homo sapiens GN=CDC42BPG PE=1 SV=2	1.22502	2	3	1	1551	172.352	6.28	117.4	127.7	129.1	71.6	77.7	76.5	124.733	75.2667	1.65722	0.000279495
Q9NUG6		PDRG1	p53 and DNA damage-regulated protein 1 OS=Homo sapiens GN=PDRG1 PE=1 SV=2	9.77444	1	1	1	133	15.501	6.06	122.1	141.9	109.3	75.8	74.8	76.1	124.433	75.5667	1.64667	0.00675032
A0A024R8Y1		POGK	Pogo transposable element with KRAB domain, isoform CRA_a OS=Homo sapiens GN=POGK PE=4 SV=1	2.13465	1	1	1	609	69.399	5.14	121.1	127.4	124.5	85.9	66.7	74.4	124.333	75.6667	1.64317	0.00115418
Q96IZ5		RBM41	RNA-binding protein 41 OS=Homo sapiens GN=RBM41 PE=1 SV=2	7.26392	1	1	1	413	47.07	8.7	118.1	133.6	120.8	107.5	53.6	66.4	124.167	75.8333	1.63736	0.0463011
P02751		FN1	Fibronectin OS=Homo sapiens GN=FN1 PE=1 SV=4	0.419111	1	1	1	2386	262.46	5.71	143.2	113.3	115.5	94.4	65.6	68.1	124	76.0333	1.63086	0.0227349
Q96AJ9		VTI1A	Vesicle transport through interaction with t-SNAREs homolog 1A OS=Homo sapiens GN=VTI1A PE=1 SV=2	4.14747	1	1	1	217	25.202	6.4	121.6	132.1	118.1	97	64.9	66.3	123.933	76.0667	1.62927	0.0132566
Q5CZB5		DKFZp686M0430	Putative uncharacterized protein DKFZp686M0430 OS=Homo sapiens GN=DKFZp686M0430 PE=2 SV=1	50.7347	41	81	2	1157	125.01	4.49	111.8	124.3	135.5	90.3	69.9	68.2	123.867	76.1333	1.62697	0.0084008
I3L2B0		CLUH	Clustered mitochondria protein homolog (Fragment) OS=Homo sapiens GN=CLUH PE=1 SV=2	33.7379	30	41	2	1236	138.142	6.04	124.9	112.6	133.7	76.2	66.4	86.3	123.733	76.3	1.62167	0.00482938
A4D198		LOC392647	Similar to mKIAA0038 protein OS=Homo sapiens GN=LOC392647 PE=4 SV=1	22.7891	5	16	1	294	32.584	8.87	119	123.8	128.1	76.7	71.6	80.9	123.633	76.4	1.61824	0.000231095
B9EG57		IQCG	IQ motif containing G OS=Homo sapiens GN=IQCG PE=2 SV=1	2.0316	1	1	1	443	51.951	6.61	119.6	128.1	122.9	79.6	82.9	67	123.533	76.5	1.61481	0.000984194
H7C4C5		MAP4	Microtubule-associated protein (Fragment) OS=Homo sapiens GN=MAP4 PE=1 SV=1	29.0061	12	25	1	493	50.945	10.21	123.4	111.2	135.1	84.9	74.1	71.4	123.233	76.8	1.6046	0.00446055
P68032		ACTC1	Actin, alpha cardiac muscle 1 OS=Homo sapiens GN=ACTC1 PE=1 SV=1	46.4191	19	196	4	377	41.992	5.39	118.2	120.3	131.2	83.4	64	83	123.233	76.8	1.6046	0.00356923
B4DUC8		MTAP	S-methyl-5'-thioadenosine phosphorylase OS=Homo sapiens GN=MTAP PE=1 SV=1	37	8	17	1	300	33.165	7.46	120.1	120.2	128.5	94	67.8	69.4	122.933	77.0667	1.59516	0.00679388
Q9HB65		ELL3	RNA polymerase II elongation factor ELL3 OS=Homo sapiens GN=ELL3 PE=1 SV=2	1.76322	1	1	1	397	45.333	6.06	120	126.9	121	73.9	74.5	83.8	122.633	77.4	1.58441	0.000303492
J3KQN4		RPL36A	60S ribosomal protein L36a OS=Homo sapiens GN=RPL36A PE=1 SV=1	21.1268	5	18	1	142	16.368	10.43	128.7	115.5	123.3	95.7	68.3	68.6	122.5	77.5333	1.57997	0.0103302
P29374		ARID4A	AT-rich interactive domain-containing protein 4A OS=Homo sapiens GN=ARID4A PE=1 SV=3	3.89817	3	3	2	1257	142.664	5.1	112.6	127.3	127	85.7	73.2	74.3	122.3	77.7333	1.57333	0.00208817
A0A024RAV4		CSDA	Cold shock domain protein A, isoform CRA_b OS=Homo sapiens GN=CSDA PE=4 SV=1	65.3465	10	38	1	303	31.928	9.66	126.1	122.8	117.6	102.2	62.1	69.2	122.167	77.8333	1.56959	0.0244817
A0A0U1RR17		SESN3	Sestrin-3 (Fragment) OS=Homo sapiens GN=SESN3 PE=1 SV=2	9.63855	1	1	1	83	9.808	8.19	126.8	122.2	116.8	64	95.2	75.1	121.933	78.1	1.56125	0.0102075
A8MQ27		NEURL1B	E3 ubiquitin-protein ligase NEURL1B OS=Homo sapiens GN=NEURL1B PE=1 SV=1	1.44144	1	1	1	555	59.232	8.37	118.2	114	133	78	68.4	88.4	121.733	78.2667	1.55537	0.0059733
Q9NYI0		PSD3	PH and SEC7 domain-containing protein 3 OS=Homo sapiens GN=PSD3 PE=1 SV=2	0.763359	1	1	1	1048	115.962	5.99	110.5	140.9	113.2	90.7	64.9	79.8	121.533	78.4667	1.54885	0.0246052
P58546		MTPN	Myotrophin OS=Homo sapiens GN=MTPN PE=1 SV=2	38.9831	4	6	4	118	12.887	5.52	108	124	132.3	81	76.2	78.6	121.433	78.6	1.54495	0.00413868
A0A024R3M7		NRGN	Neurogranin (Protein kinase C substrate, RC3), isoform CRA_a OS=Homo sapiens GN=NRGN PE=4 SV=1	41.0256	1	1	1	78	7.614	7.87	92	138.6	133.4	79.2	83.2	73.6	121.333	78.6667	1.54237	0.0466917
Q59ER5			WD repeat-containing protein 1 isoform 1 variant (Fragment) OS=Homo sapiens PE=2 SV=1	59.2949	28	55	1	624	68.128	7.23	122.8	113	127.3	71.8	79.4	85.7	121.033	78.9667	1.53271	0.00195403
Q86YL5		TDRP	Testis development-related protein OS=Homo sapiens GN=TDRP PE=1 SV=2	6.48649	1	1	1	185	20.39	6.01	112.1	123.9	126	79.8	69.8	88.4	120.667	79.3333	1.52101	0.00390387
Q9BRS2		RIOK1	Serine/threonine-protein kinase RIO1 OS=Homo sapiens GN=RIOK1 PE=1 SV=2	1.40845	1	1	1	568	65.542	6.19	118.2	117.9	125.3	96.5	67.4	74.7	120.467	79.5333	1.51467	0.010713
P15170		GSPT1	Eukaryotic peptide chain release factor GTP-binding subunit ERF3A OS=Homo sapiens GN=GSPT1 PE=1 SV=1	56.7134	25	51	10	499	55.72	5.62	117.5	115.4	127.7	78.1	79.9	81.3	120.2	79.7667	1.5069	0.000493493
P07197		NEFM	Neurofilament medium polypeptide OS=Homo sapiens GN=NEFM PE=1 SV=3	2.72926	3	15	1	916	102.411	4.91	135.6	118.4	106.1	81.6	85.9	72.3	120.033	79.9333	1.50167	0.013226
E5RJD8		TBCA	Tubulin-specific chaperone A OS=Homo sapiens GN=TBCA PE=1 SV=1	57.1429	13	22	13	119	14.297	5.12	111.6	120	128.5	78	80.2	81.7	120.033	79.9667	1.50104	0.00131109
P31947		SFN	14-3-3 protein sigma OS=Homo sapiens GN=SFN PE=1 SV=1	62.0968	14	56	10	248	27.757	4.74	109.8	118.7	131.6	77.3	81	81.6	120.033	79.9667	1.50104	0.00345597
D6W4Z6		hCG_23833	HCG23833, isoform CRA_b OS=Homo sapiens GN=hCG_23833 PE=4 SV=1	22.049	7	10	6	449	51.044	6.57	125.3	99.5	135.3	78.3	75	86.6	120.033	79.9667	1.50104	0.0232828
A0A024R6U9		ARL2BP	ADP-ribosylation factor-like 2 binding protein, isoform CRA_a OS=Homo sapiens GN=ARL2BP PE=4 SV=1	16.5644	2	3	2	163	18.81	4.35	116.2	117.7	126.1	76.3	75.5	88.2	120	80	1.5	0.00146332
A0A024QZR3		hCG_2002731	Protein pelota homolog OS=Homo sapiens GN=hCG_2002731 PE=3 SV=1	13.7662	4	6	4	385	43.35	6.34	116.4	117.8	124.8	85.9	75.5	79.6	119.667	80.3333	1.48963	0.00059246
Q8TBB5		KLHDC4	Kelch domain-containing protein 4 OS=Homo sapiens GN=KLHDC4 PE=1 SV=1	6.73077	2	2	2	520	57.855	5.72	124.2	114	120.8	72.5	81.1	87.4	119.667	80.3333	1.48963	0.00170655
P23381		WARS	Tryptophan--tRNA ligase, cytoplasmic OS=Homo sapiens GN=WARS PE=1 SV=2	40.9766	15	31	15	471	53.132	6.23	113.7	119.5	125.6	82.9	77	81.3	119.6	80.4	1.48756	0.000529896
Q9Y6N7		ROBO1	Roundabout homolog 1 OS=Homo sapiens GN=ROBO1 PE=1 SV=1	0.90854	1	1	1	1651	180.818	6.04	131	110.7	116	79.3	86.3	76.7	119.233	80.7667	1.47627	0.00461275
Q76LA1		CSTB	CSTB protein OS=Homo sapiens GN=CSTB PE=2 SV=1	88.7755	6	26	6	98	11.133	7.56	111.2	117.6	128.7	81.6	77	84	119.167	80.8667	1.47362	0.00224949
B4DHQ3			Phosphoserine aminotransferase OS=Homo sapiens PE=2 SV=1	43.3735	15	36	15	415	45.326	9.03	115.5	118.2	123.6	74.2	83.3	85.2	119.1	80.9	1.47219	0.000771351
B7Z2B5			cDNA FLJ54713, highly similar to Gephyrin OS=Homo sapiens PE=2 SV=1	5.6266	3	4	3	782	84.695	5.73	134.7	106.1	116.5	76.5	79.9	86.3	119.1	80.9	1.47219	0.0124244
P33981		TTK	Dual specificity protein kinase TTK OS=Homo sapiens GN=TTK PE=1 SV=2	1.75029	1	1	1	857	97.011	8.16	121.2	113.3	122.8	84.4	80.7	77.6	119.1	80.9	1.47219	0.000415349
I3L337		COG7	Conserved oligomeric Golgi complex subunit 7 (Fragment) OS=Homo sapiens GN=COG7 PE=1 SV=1	11.5044	1	1	1	113	12.059	4.59	117.3	118.9	121	81.6	84.5	76.8	119.067	80.9667	1.47056	0.000106031
O75843		AP1G2	AP-1 complex subunit gamma-like 2 OS=Homo sapiens GN=AP1G2 PE=1 SV=1	1.1465	1	1	1	785	87.062	6.55	101.1	133.6	122.3	75.8	73	94.3	119	81.0333	1.46853	0.0309975
Q59GW6			Acetyl-CoA acetyltransferase, cytosolic variant (Fragment) OS=Homo sapiens PE=2 SV=1	54.703	13	31	1	404	42.109	7.4	108.7	122.5	125.2	85.5	77.2	81	118.8	81.2333	1.46245	0.00264761
Q6ZRV2		FAM83H	Protein FAM83H OS=Homo sapiens GN=FAM83H PE=1 SV=3	1.52672	1	1	1	1179	127.044	6.98	112.2	123.2	121	94.2	64.4	85.1	118.8	81.2333	1.46245	0.0163835
P61956		SUMO2	Small ubiquitin-related modifier 2 OS=Homo sapiens GN=SUMO2 PE=1 SV=3	27.3684	3	17	2	95	10.864	5.5	113.8	119.6	122.5	88.5	78.8	76.8	118.633	81.3667	1.45801	0.00108993
O14893		GEMIN2	Gem-associated protein 2 OS=Homo sapiens GN=GEMIN2 PE=1 SV=1	4.28571	1	1	1	280	31.565	5.58	123	109.4	123.5	83.1	76.9	84.2	118.633	81.4	1.45741	0.00193836
A0A024R9J2		FSIP1	Fibrous sheath interacting protein 1, isoform CRA_a OS=Homo sapiens GN=FSIP1 PE=4 SV=1	1.20482	1	2	1	581	66.08	5.16	127.6	114	114.1	89.2	85.1	70	118.567	81.4333	1.456	0.00732939
A8K7W3			cDNA FLJ75780, highly similar to Homo sapiens SGT1, suppressor of G2 allele of SKP1 (SUGT1), mRNA OS=Homo sapiens PE=2 SV=1	54.955	15	26	5	333	37.81	5.15	116	117.1	121.8	86.8	74.6	83.8	118.3	81.7333	1.44739	0.000856326
A0A024R9T6		SLAIN2	HCG17415, isoform CRA_a OS=Homo sapiens GN=SLAIN2 PE=2 SV=1	2.0654	1	1	1	581	62.505	9.45	124.3	119.9	110.6	77.1	78.9	89.2	118.267	81.7333	1.44698	0.00271006
Q06830		PRDX1	Peroxiredoxin-1 OS=Homo sapiens GN=PRDX1 PE=1 SV=1	76.8844	21	91	17	199	22.096	8.13	112	118.1	124.6	77.5	83	84.7	118.233	81.7333	1.44657	0.000998458
Q96RU3		FNBP1	Formin-binding protein 1 OS=Homo sapiens GN=FNBP1 PE=1 SV=2	1.13452	1	1	1	617	71.262	5.72	122.9	111.2	120.6	77	75.4	92.9	118.233	81.7667	1.44598	0.00533862
P08243		ASNS	Asparagine synthetase [glutamine-hydrolyzing] OS=Homo sapiens GN=ASNS PE=1 SV=4	54.1889	24	47	2	561	64.329	6.86	110.7	120.7	122.9	73.5	85.8	86.4	118.1	81.9	1.442	0.00302036
Q6P2H3		CEP85	Centrosomal protein of 85 kDa OS=Homo sapiens GN=CEP85 PE=1 SV=1	4.85564	3	3	3	762	85.586	6	117.9	114.4	122	88.7	73.4	83.6	118.1	81.9	1.442	0.00193922
Q96KG9		SCYL1	N-terminal kinase-like protein OS=Homo sapiens GN=SCYL1 PE=1 SV=1	13.6139	7	10	7	808	89.575	6.3	117.3	112.5	124.6	85.3	78.4	82.1	118.133	81.9333	1.44182	0.000861011
A0A024R394		CHORDC1	Cysteine and histidine-rich domain (CHORD)-containing 1, isoform CRA_c OS=Homo sapiens GN=CHORDC1 PE=4 SV=1	51.506	12	27	12	332	37.51	7.72	111.2	112.6	130.2	74.6	82.5	88.9	118	82	1.43902	0.00817533
Q8NG31		KNL1	Kinetochore scaffold 1 OS=Homo sapiens GN=KNL1 PE=1 SV=3	2.17763	3	5	3	2342	265.224	5.47	117.6	121.1	114.8	81.4	83	82	117.833	82.1333	1.43466	4.54167e-05
B5BU83		STMN1	Stathmin OS=Homo sapiens GN=STMN1 PE=2 SV=1	66.443	16	41	16	149	17.32	5.97	108.9	121.6	123	81.5	79.8	85.3	117.833	82.2	1.4335	0.0017171
Q16658		FSCN1	Fascin OS=Homo sapiens GN=FSCN1 PE=1 SV=3	64.0974	26	71	26	493	54.496	7.24	112.6	114.3	126.4	78.1	80.5	88	117.767	82.2	1.43268	0.00251153
Q05086		UBE3A	Ubiquitin-protein ligase E3A OS=Homo sapiens GN=UBE3A PE=1 SV=4	4.11429	2	2	2	875	100.623	5.22	113.6	121.9	117.7	73.5	75.7	97.6	117.733	82.2667	1.43112	0.0116754
A0A024RA19		MAPT	Microtubule-associated protein OS=Homo sapiens GN=MAPT PE=4 SV=1	13.1234	4	4	4	381	39.696	8.62	110.7	125.7	116.7	75.5	77.9	93.6	117.7	82.3333	1.42955	0.00780593
A0A024RD93		PAICS	Phosphoribosylaminoimidazole carboxylase, phosphoribosylaminoimidazole succinocarboxamide synthetase, isoform CRA_c OS=Homo sapiens GN=PAICS PE=3 SV=1	46.3529	21	40	21	425	47.049	7.23	114.9	113.7	124.3	79.8	79.4	87.8	117.633	82.3333	1.42874	0.00122794
Q86WQ0		NR2C2AP	Nuclear receptor 2C2-associated protein OS=Homo sapiens GN=NR2C2AP PE=1 SV=1	19.4245	2	3	2	139	15.866	6.16	114.2	121.2	117.4	95.2	68.8	83.2	117.6	82.4	1.42718	0.0111738
P00918		CA2	Carbonic anhydrase 2 OS=Homo sapiens GN=CA2 PE=1 SV=2	52.3077	11	26	11	260	29.228	7.4	112.8	115.6	124.4	76.1	86.5	84.7	117.6	82.4333	1.42661	0.00176797
B3KXN9			cDNA FLJ45793 fis, clone NT2RI2009233 OS=Homo sapiens PE=2 SV=1	4.07407	1	1	1	270	29.835	6.04	113.8	128.9	110	95.6	73.2	78.5	117.567	82.4333	1.4262	0.0167769
F5GXR3		PTMS	Parathymosin OS=Homo sapiens GN=PTMS PE=1 SV=1	10.5769	1	3	1	104	12.067	11	115.9	125	111.7	73.8	88.6	85	117.533	82.4667	1.42522	0.00411613
Q13509		TUBB3	Tubulin beta-3 chain OS=Homo sapiens GN=TUBB3 PE=1 SV=2	50.2222	20	213	4	450	50.4	4.93	132.2	104.4	115.7	76.4	83.7	87.6	117.433	82.5667	1.42229	0.0161119
B4DL86			6-phosphogluconate dehydrogenase, decarboxylating OS=Homo sapiens PE=2 SV=1	43.3566	15	34	5	429	47.445	6.47	110	117.5	124.6	76	84.5	87.3	117.367	82.6	1.4209	0.0030229
P14635		CCNB1	G2/mitotic-specific cyclin-B1 OS=Homo sapiens GN=CCNB1 PE=1 SV=1	11.7783	5	8	5	433	48.306	7.47	120.9	102.1	129	87.7	75.8	84.6	117.333	82.7	1.41878	0.0165677
Q7Z739		YTHDF3	YTH domain-containing family protein 3 OS=Homo sapiens GN=YTHDF3 PE=1 SV=1	24.4444	9	14	6	585	63.822	9.04	123.9	106.4	121.2	81	82.6	84.9	117.167	82.8333	1.41449	0.00348396
P55010		EIF5	Eukaryotic translation initiation factor 5 OS=Homo sapiens GN=EIF5 PE=1 SV=2	32.4826	15	24	15	431	49.192	5.58	116.6	107.6	127	83.7	79.1	86	117.067	82.9333	1.41158	0.00460432
Q96BW5		PTER	Phosphotriesterase-related protein OS=Homo sapiens GN=PTER PE=1 SV=1	14.0401	4	5	4	349	38.993	6.52	108.9	120.4	121.8	80.4	78.2	90.2	117.033	82.9333	1.41117	0.00345343
A0A024R3W7		EEF1B2	Eukaryotic translation elongation factor 1 beta 2, isoform CRA_a OS=Homo sapiens GN=EEF1B2 PE=3 SV=1	57.3333	12	42	6	225	24.748	4.67	120.1	112.9	118.1	74.3	87.4	87.3	117.033	83	1.41004	0.00217299
Q9BW83		IFT27	Intraflagellar transport protein 27 homolog OS=Homo sapiens GN=IFT27 PE=1 SV=1	54.3011	7	8	7	186	20.467	5.41	108	121.7	121.2	79.8	80.7	88.6	116.967	83.0333	1.40867	0.00302545
A0A024R7B7		CDC37	CDC37 cell division cycle 37 homolog (S. cerevisiae), isoform CRA_a OS=Homo sapiens GN=CDC37 PE=4 SV=1	39.9471	15	35	15	378	44.44	5.25	111.8	117	122	78.4	84.3	86.5	116.933	83.0667	1.4077	0.000885398
H0YBF1		BRD9	Bromodomain-containing protein 9 (Fragment) OS=Homo sapiens GN=BRD9 PE=1 SV=1	13.2184	1	3	1	174	19.082	5.34	114.3	123.8	112.7	87.6	77.2	84.4	116.933	83.0667	1.4077	0.00186191
Q01813		PFKP	ATP-dependent 6-phosphofructokinase, platelet type OS=Homo sapiens GN=PFKP PE=1 SV=2	59.8214	42	166	33	784	85.542	7.55	112.4	113.4	124.9	76.7	84.9	87.7	116.9	83.1	1.40674	0.00287746
D3DND1		CDV3	CDV3 homolog (Mouse), isoform CRA_a OS=Homo sapiens GN=CDV3 PE=4 SV=1	48.062	8	11	8	258	28.581	9.44	111.3	115.8	123.3	79.8	82	87.7	116.8	83.1667	1.40441	0.00134048
Q9H8M7		MINDY3	Ubiquitin carboxyl-terminal hydrolase MINDY-3 OS=Homo sapiens GN=MINDY3 PE=1 SV=1	6.74157	2	2	2	445	49.693	4.77	107.9	116.8	125.5	78.4	78.8	92.6	116.733	83.2667	1.40192	0.0083366
Q8IUI8		CRLF3	Cytokine receptor-like factor 3 OS=Homo sapiens GN=CRLF3 PE=1 SV=2	8.1448	3	3	3	442	49.735	5.14	113.7	118.6	117.8	74.4	77.7	97.8	116.7	83.3	1.40096	0.0110549
P49407		ARRB1	Beta-arrestin-1 OS=Homo sapiens GN=ARRB1 PE=1 SV=2	31.3397	9	10	7	418	47.036	6.2	112.2	120.4	117.4	88.5	78.4	83.1	116.667	83.3333	1.4	0.000908128
V9HWC9		HEL-S-44	Superoxide dismutase [Cu-Zn] OS=Homo sapiens GN=HEL-S-44 PE=2 SV=1	86.3636	10	38	10	154	15.926	6.13	111.1	119.1	119.6	80.4	85.4	84.4	116.6	83.4	1.39808	0.000457847
V9HWB8		HEL-S-30	Pyruvate kinase OS=Homo sapiens GN=HEL-S-30 PE=1 SV=1	80.4143	46	307	5	531	57.9	7.84	110.2	116.4	123.2	76.4	81.3	92.6	116.6	83.4333	1.39752	0.00552424
Q969F9		HPS3	Hermansky-Pudlak syndrome 3 protein OS=Homo sapiens GN=HPS3 PE=1 SV=1	3.68526	3	3	3	1004	113.662	6.43	119.3	118.7	111.6	80.2	85.3	84.9	116.533	83.4667	1.39617	0.000368279
Q15056		EIF4H	Eukaryotic translation initiation factor 4H OS=Homo sapiens GN=EIF4H PE=1 SV=5	54.0323	10	31	6	248	27.368	7.23	106.5	122.3	120.8	80.7	76.9	92.8	116.533	83.4667	1.39617	0.00893032
Q9Y6A5		TACC3	Transforming acidic coiled-coil-containing protein 3 OS=Homo sapiens GN=TACC3 PE=1 SV=1	5.48926	4	4	4	838	90.304	5.05	120.2	112.1	117.2	74.2	75.7	100.7	116.5	83.5333	1.39465	0.0208629
Q15631		TSN	Translin OS=Homo sapiens GN=TSN PE=1 SV=1	28.0702	7	12	7	228	26.167	6.44	114.6	115.7	119.1	76.7	84.9	89	116.467	83.5333	1.39425	0.00103684
P49588		AARS	Alanine--tRNA ligase, cytoplasmic OS=Homo sapiens GN=AARS PE=1 SV=2	51.6529	40	82	40	968	106.743	5.53	111.8	113.2	124.4	78.3	84.9	87.5	116.467	83.5667	1.3937	0.00244067
Q9P0J7		KCMF1	E3 ubiquitin-protein ligase KCMF1 OS=Homo sapiens GN=KCMF1 PE=1 SV=2	13.3858	3	4	3	381	41.919	5.66	106.2	128.7	114.3	98.5	75.9	76.4	116.4	83.6	1.39234	0.0299436
Q712K3		UBE2R2	Ubiquitin-conjugating enzyme E2 R2 OS=Homo sapiens GN=UBE2R2 PE=1 SV=1	13.0252	3	3	3	238	27.149	4.42	112.2	116	120.7	78	84.3	88.8	116.3	83.7	1.38949	0.00121205
Q53FI7			Four and a half LIM domains 1 variant (Fragment) OS=Homo sapiens PE=2 SV=1	43.5714	9	15	9	280	31.874	8.22	111.1	120.8	117	79.9	82.4	88.9	116.3	83.7333	1.38893	0.00111697
Q9Y2V2		CARHSP1	Calcium-regulated heat-stable protein 1 OS=Homo sapiens GN=CARHSP1 PE=1 SV=2	44.2177	5	10	5	147	15.882	8.21	106.9	124.5	117.4	83.3	83.6	84.3	116.267	83.7333	1.38854	0.00314518
P26641		EEF1G	Elongation factor 1-gamma OS=Homo sapiens GN=EEF1G PE=1 SV=3	52.1739	20	75	20	437	50.087	6.67	113.8	113.6	121.3	77.2	84.5	89.6	116.233	83.7667	1.38758	0.00179969
B4DLV7			Rab GDP dissociation inhibitor OS=Homo sapiens PE=2 SV=1	74.1648	30	98	22	449	51.121	8.18	109.7	111.8	127	77.2	87.5	86.7	116.167	83.8	1.38624	0.00709822
B2RDY9			Adenylyl cyclase-associated protein OS=Homo sapiens PE=2 SV=1	58.9474	22	58	22	475	51.583	8.22	118.3	109	121.3	78.3	83.1	90.1	116.2	83.8333	1.38608	0.00303255
Q8WUX2		CHAC2	Putative glutathione-specific gamma-glutamylcyclotransferase 2 OS=Homo sapiens GN=CHAC2 PE=2 SV=1	8.69565	1	2	1	184	20.862	5.43	117.8	115.5	115.2	79.8	73.5	98.2	116.167	83.8333	1.38569	0.0122825
Q05CW7		NAT10	NAT10 protein (Fragment) OS=Homo sapiens GN=NAT10 PE=2 SV=1	46.3899	21	37	1	554	62.345	9.26	120.8	114.9	112.7	87.7	76.2	87.8	116.133	83.9	1.38419	0.00208999
A0A0A0MSG2		FHL2	Four and a half LIM domains protein 2 OS=Homo sapiens GN=FHL2 PE=1 SV=1	46.8354	13	19	13	395	44.808	8.06	114.7	115.5	118.1	81.6	79.8	90.3	116.1	83.9	1.38379	0.000693865
Q9Y239		NOD1	Nucleotide-binding oligomerization domain-containing protein 1 OS=Homo sapiens GN=NOD1 PE=1 SV=1	0.734523	1	1	1	953	107.622	7.11	115.5	122.3	110.5	80.6	84	87.2	116.1	83.9333	1.38324	0.0011956
O43175		PHGDH	D-3-phosphoglycerate dehydrogenase OS=Homo sapiens GN=PHGDH PE=1 SV=4	51.2195	22	58	22	533	56.614	6.71	109.5	118	120.7	77.9	86.4	87.5	116.067	83.9333	1.38284	0.00209875
P17812		CTPS1	CTP synthase 1 OS=Homo sapiens GN=CTPS1 PE=1 SV=2	50.9306	25	48	22	591	66.648	6.46	118.3	105.6	124.3	73.7	85.6	92.5	116.067	83.9333	1.38284	0.0144939
V9HWK2		HEL114	Epididymis luminal protein 114 OS=Homo sapiens GN=HEL114 PE=2 SV=1	61.552	62	143	62	1134	123.722	5.66	111.6	112.3	124.1	79.2	83.7	89.1	116	84	1.38095	0.00297832
Q96C19		EFHD2	EF-hand domain-containing protein D2 OS=Homo sapiens GN=EFHD2 PE=1 SV=1	53.75	14	33	12	240	26.68	5.2	110.7	117.7	119.5	86.9	78.9	86.2	115.967	84	1.38056	0.000995051
D3DWX8		FAM3A	Family with sequence similarity 3, member A, isoform CRA_c OS=Homo sapiens GN=FAM3A PE=1 SV=1	7.37705	1	1	1	244	26.703	7.18	124.1	116	107.8	92.1	69.3	90.7	115.967	84.0333	1.38001	0.0217851
A0A024RAI1		ACTR3	ARP3 actin-related protein 3 homolog (Yeast), isoform CRA_a OS=Homo sapiens GN=ACTR3 PE=3 SV=1	65.5502	21	55	3	418	47.341	5.88	115.1	113.6	119.1	84.5	79.4	88.4	115.933	84.1	1.37852	0.000494337
P26639		TARS	Threonine--tRNA ligase, cytoplasmic OS=Homo sapiens GN=TARS PE=1 SV=3	51.314	36	83	33	723	83.382	6.67	113.8	111.4	122.4	77.4	84.9	90.1	115.867	84.1333	1.37718	0.00309649
Q9UQN3		CHMP2B	Charged multivesicular body protein 2b OS=Homo sapiens GN=CHMP2B PE=1 SV=1	24.8826	6	7	6	213	23.891	8.76	109.2	116.2	122.2	93.4	77.5	81.6	115.867	84.1667	1.37663	0.00641089
P00966		ASS1	Argininosuccinate synthase OS=Homo sapiens GN=ASS1 PE=1 SV=2	20.1456	7	10	7	412	46.501	8.02	110	118.1	119.3	84.6	84	84	115.8	84.2	1.3753	0.000417749
Q8N6N7		ACBD7	Acyl-CoA-binding domain-containing protein 7 OS=Homo sapiens GN=ACBD7 PE=1 SV=1	36.3636	2	3	2	88	9.784	6.71	106.9	124.7	115.5	81.3	79.8	91.8	115.7	84.3	1.37248	0.00790607
A0A024R275		RFK	Riboflavin kinase, isoform CRA_a OS=Homo sapiens GN=RFK PE=4 SV=1	6.79012	1	2	1	162	18.398	8	112.2	112.8	122.1	81.7	82.2	89	115.7	84.3	1.37248	0.00139128
Q5TCU3		TPM2	Tropomyosin beta chain OS=Homo sapiens GN=TPM2 PE=1 SV=1	60.2113	23	44	2	284	32.795	4.68	119.2	110.1	117.7	86.5	70.7	95.9	115.667	84.3667	1.371	0.0164649
Q9UJY4		GGA2	ADP-ribosylation factor-binding protein GGA2 OS=Homo sapiens GN=GGA2 PE=1 SV=3	5.22023	2	2	2	613	67.108	6.55	120.4	110.1	116.4	90.4	78.3	84.4	115.633	84.3667	1.3706	0.00245333
Q9GZZ9		UBA5	Ubiquitin-like modifier-activating enzyme 5 OS=Homo sapiens GN=UBA5 PE=1 SV=1	11.3861	3	4	3	404	44.834	4.84	109.4	114.9	122.6	82.4	80.4	90.3	115.633	84.3667	1.3706	0.00304236
Q9GZT9		EGLN1	Egl nine homolog 1 OS=Homo sapiens GN=EGLN1 PE=1 SV=1	40.8451	12	16	12	426	45.992	8.53	113.8	112.2	120.8	80.8	84.8	87.6	115.6	84.4	1.36967	0.000695147
Q6PL24		TMED8	Protein TMED8 OS=Homo sapiens GN=TMED8 PE=1 SV=1	8	2	2	2	325	35.718	4.74	110.4	114.5	121.9	82.9	76.9	93.4	115.6	84.4	1.36967	0.00606171
J3KQ32		OLA1	Obg-like ATPase 1 OS=Homo sapiens GN=OLA1 PE=1 SV=1	39.6635	13	27	13	416	46.908	8.06	110.4	110.3	125.9	80.5	84.9	87.9	115.533	84.4333	1.36834	0.0051821
A0A024R1S8		LASP1	LIM and SH3 protein 1, isoform CRA_b OS=Homo sapiens GN=LASP1 PE=4 SV=1	41.7625	13	24	13	261	29.698	7.05	112.8	109.5	124.3	82.5	81.1	89.7	115.533	84.4333	1.36834	0.0039762
B2R8Y4			cDNA, FLJ94117, highly similar to Homo sapiens actinin, alpha 3 (ACTN3), mRNA OS=Homo sapiens PE=1 SV=1	11.7647	13	32	2	901	103.187	5.6	112.8	111.6	122.1	76.1	85.9	91.4	115.5	84.4667	1.3674	0.00508698
A0A087WW40		SH3GLB1	Endophilin-B1 OS=Homo sapiens GN=SH3GLB1 PE=1 SV=1	23.3503	8	14	7	394	44.233	6.44	113.3	113.7	119.4	78.5	84.2	90.8	115.467	84.5	1.36647	0.00159165
B1AKJ6		OSBPL9	Oxysterol-binding protein OS=Homo sapiens GN=OSBPL9 PE=2 SV=1	4.31849	3	5	3	741	83.733	6.48	118.3	113.2	115	84.7	85.4	83.5	115.5	84.5333	1.36632	4.12911e-05
P62633		CNBP	Cellular nucleic acid-binding protein OS=Homo sapiens GN=CNBP PE=1 SV=1	48.5876	7	16	7	177	19.45	7.71	119.9	112.9	113.5	87.8	84.7	81.1	115.433	84.5333	1.36554	0.00047616
A0A024R098		AMPD2	AMP deaminase OS=Homo sapiens GN=AMPD2 PE=3 SV=1	14.3345	11	13	11	879	100.624	6.93	112.7	113.4	120.1	81.2	82.1	90.5	115.4	84.6	1.36407	0.00124198
Q5U045		CSNK1E	Casein kinase 1 epsilon OS=Homo sapiens GN=CSNK1E PE=2 SV=1	24.2788	8	9	2	416	47.285	9.66	110.2	119.2	116.8	81.9	78	93.9	115.4	84.6	1.36407	0.00495634
Q9Y266		NUDC	Nuclear migration protein nudC OS=Homo sapiens GN=NUDC PE=1 SV=1	53.7764	20	40	20	331	38.219	5.38	113.2	111.2	121.7	82.1	82.4	89.3	115.367	84.6	1.36367	0.00151716
Q96FZ2		HMCES	Embryonic stem cell-specific 5-hydroxymethylcytosine-binding protein OS=Homo sapiens GN=HMCES PE=1 SV=1	9.60452	3	3	3	354	40.549	8.15	122.4	115.4	108.2	91	75.9	87	115.333	84.6333	1.36274	0.00731757
M1VKI3		SDC4-ROS1_S4;R32	Tyrosine-protein kinase receptor OS=Homo sapiens GN=SDC4-ROS1_S4;R32 PE=2 SV=1	4.82574	3	3	3	746	83.073	4.97	127.5	102.8	115.6	87.8	83	83.3	115.3	84.7	1.36128	0.0137794
P18827		SDC1	Syndecan-1 OS=Homo sapiens GN=SDC1 PE=1 SV=3	5.48387	1	1	1	310	32.442	4.63	110.6	114.9	120	69.6	88.1	96.9	115.167	84.8667	1.35703	0.0234101
P0DN79		CBSL	Cystathionine beta-synthase-like protein OS=Homo sapiens GN=CBSL PE=1 SV=1	24.5009	8	9	8	551	60.548	6.65	111.6	117.6	116	81.1	83.3	90.4	115.067	84.9333	1.35479	0.000826863
B4DW52			cDNA FLJ55253, highly similar to Actin, cytoplasmic 1 OS=Homo sapiens PE=2 SV=1	77.8098	24	452	1	347	38.608	5.35	127.6	103.4	114.1	90.2	73.9	90.7	115.033	84.9333	1.3544	0.0278789
I3L156		PIMREG	Protein PIMREG OS=Homo sapiens GN=PIMREG PE=1 SV=2	6.09319	1	1	1	279	30.882	9.52	109.9	111.7	123.5	86.8	80.3	87.7	115.033	84.9333	1.3544	0.00345688
P60660		MYL6	Myosin light polypeptide 6 OS=Homo sapiens GN=MYL6 PE=1 SV=2	88.7417	13	62	3	151	16.919	4.65	110.6	121	113.4	81	82.1	91.9	115	85	1.35294	0.00297992
Q06203		PPAT	Amidophosphoribosyltransferase OS=Homo sapiens GN=PPAT PE=1 SV=1	11.7988	5	7	5	517	57.362	6.76	109.7	118.2	117.1	86.4	79.7	89	115	85.0333	1.35241	0.00146462
C4P096		DISC1	Disrupted in schizophrenia 1 isoform 8 OS=Homo sapiens GN=DISC1 PE=2 SV=1	0.790068	1	1	1	886	96.723	6.28	123.6	107.1	114.1	82.3	87.8	85	114.933	85.0333	1.35163	0.00404102
B0YIW5		ARCN1	Coatomer subunit delta OS=Homo sapiens GN=ARCN1 PE=2 SV=1	47.7495	27	48	27	511	57.174	6.21	114.8	108.5	121.5	77.6	84.2	93.4	114.933	85.0667	1.3511	0.00726822
B2R4V2			cDNA, FLJ92227, highly similar to Homo sapiens ribosomal protein L36a-like (RPL36AL), mRNA OS=Homo sapiens PE=2 SV=1	28.3019	5	15	1	106	12.519	10.65	117.6	111.2	115.9	104.7	72	78.6	114.9	85.1	1.35018	0.042748
H3BU16		JPT2	Jupiter microtubule-associated homolog 2 (Fragment) OS=Homo sapiens GN=JPT2 PE=1 SV=1	69.4611	8	18	1	167	17.593	9.09	103.9	120.5	120.2	76.9	81.1	97.3	114.867	85.1	1.34978	0.0229643
V9HW12		HEL-S-2a	Epididymis secretory sperm binding protein Li 2a OS=Homo sapiens GN=HEL-S-2a PE=2 SV=1	55.0505	12	34	11	198	21.878	5.97	108.6	118.5	117.6	78.9	89.6	87	114.9	85.1667	1.34912	0.00274961
A6NGJ0		DYNLT3	Dynein light chain Tctex-type 3 OS=Homo sapiens GN=DYNLT3 PE=1 SV=1	11.1842	1	1	1	152	16.968	5.92	114.7	117.4	112.4	81.8	86.3	87.3	114.833	85.1333	1.34886	0.000181999
Q9H4G0		EPB41L1	Band 4.1-like protein 1 OS=Homo sapiens GN=EPB41L1 PE=1 SV=2	1.70261	1	1	1	881	98.442	5.62	113.1	113	118.5	72.6	89.7	93.2	114.867	85.1667	1.34873	0.0109264
D6REM4		CSNK1A1	Casein kinase I isoform alpha OS=Homo sapiens GN=CSNK1A1 PE=1 SV=1	21.6102	5	6	1	236	27.723	9.44	119.3	110.3	114.8	99.2	67.5	88.8	114.8	85.1667	1.34795	0.0376641
O43765		SGTA	Small glutamine-rich tetratricopeptide repeat-containing protein alpha OS=Homo sapiens GN=SGTA PE=1 SV=1	21.0863	6	14	6	313	34.042	4.87	111.4	115.2	117.6	86.2	79.7	89.9	114.733	85.2667	1.34558	0.00107204
Q9H3S5		PIGM	GPI mannosyltransferase 1 OS=Homo sapiens GN=PIGM PE=1 SV=1	3.30969	1	1	1	423	49.427	9.11	107	123.4	113.8	78.8	91.5	85.5	114.733	85.2667	1.34558	0.00801351
Q13177		PAK2	Serine/threonine-protein kinase PAK 2 OS=Homo sapiens GN=PAK2 PE=1 SV=3	56.2977	22	45	16	524	58.006	5.96	114.7	106.2	123.2	76.9	89.3	89.7	114.7	85.3	1.34467	0.0104112
Q9NY33		DPP3	Dipeptidyl peptidase 3 OS=Homo sapiens GN=DPP3 PE=1 SV=2	35.8209	17	28	4	737	82.538	5.1	110.5	115.2	118.3	74.8	79	102.2	114.667	85.3333	1.34375	0.0291855
B2R9S4			cDNA, FLJ94534, highly similar to Homo sapiens capping protein (actin filament), gelsolin-like(CAPG), mRNA OS=Homo sapiens PE=2 SV=1	44.5402	10	20	10	348	38.473	6.37	116	109.9	118.1	81.7	85.8	88.5	114.667	85.3333	1.34375	0.000744832
B2RBP7			cDNA, FLJ95623, highly similar to Homo sapiens differentially expressed in FDCP 6 homolog (mouse) (DEF6), mRNA OS=Homo sapiens PE=2 SV=1	2.69414	1	1	1	631	73.88	5.88	107.9	117.5	118.6	86.5	75.7	93.8	114.667	85.3333	1.34375	0.00940734
Q9NPA3		MID1IP1	Mid1-interacting protein 1 OS=Homo sapiens GN=MID1IP1 PE=1 SV=1	15.847	3	3	3	183	20.189	5.5	115.9	109.9	118	84.5	78.4	93.2	114.6	85.3667	1.34244	0.0040618
A6NFX8		NUDT5	ADP-sugar pyrophosphatase OS=Homo sapiens GN=NUDT5 PE=1 SV=1	50.431	9	24	9	232	25.879	5.19	109.1	115.3	119.4	81.9	89.4	84.8	114.6	85.3667	1.34244	0.00139606
P35080		PFN2	Profilin-2 OS=Homo sapiens GN=PFN2 PE=1 SV=3	45.7143	8	16	3	140	15.036	6.99	108.2	115.6	120	89.2	83.8	83.3	114.6	85.4333	1.3414	0.00175425
P17676		CEBPB	CCAAT/enhancer-binding protein beta OS=Homo sapiens GN=CEBPB PE=1 SV=2	5.21739	1	1	1	345	36.083	8.31	118.8	102.8	122	91.9	74	90.4	114.533	85.4333	1.34062	0.0243335
Q5U077		LDHB	L-lactate dehydrogenase OS=Homo sapiens GN=LDHB PE=2 SV=1	55.3892	19	95	18	334	36.615	6.05	111.9	109.3	122.4	76.4	91.1	88.9	114.533	85.4667	1.34009	0.00878037
Q9NWQ9		C14orf119	Uncharacterized protein C14orf119 OS=Homo sapiens GN=C14orf119 PE=1 SV=1	8.57143	1	1	1	140	15.999	4.94	121.5	112.6	109.5	100.9	76.1	79.5	114.533	85.5	1.33957	0.0274354
Q15942		ZYX	Zyxin OS=Homo sapiens GN=ZYX PE=1 SV=1	31.2937	11	19	11	572	61.238	6.67	109.9	109.6	123.9	82.3	87	87.3	114.467	85.5333	1.33827	0.00439156
P07900		HSP90AA1	Heat shock protein HSP 90-alpha OS=Homo sapiens GN=HSP90AA1 PE=1 SV=5	68.4426	61	356	39	732	84.607	5.02	112.8	106.8	123.7	79.7	86.2	90.8	114.433	85.5667	1.33736	0.00809703
O75792		RNASEH2A	Ribonuclease H2 subunit A OS=Homo sapiens GN=RNASEH2A PE=1 SV=2	14.3813	3	3	3	299	33.374	5.25	115.3	115.6	112.3	86.6	79.8	90.3	114.4	85.5667	1.33697	0.000891951
E7EW49		CLASP2	CLIP-associating protein 2 OS=Homo sapiens GN=CLASP2 PE=1 SV=1	9.64333	11	14	2	1514	165.596	8.25	120.9	115.6	106.7	92.2	78.5	86.1	114.4	85.6	1.33645	0.00736666
Q96K76		USP47	Ubiquitin carboxyl-terminal hydrolase 47 OS=Homo sapiens GN=USP47 PE=1 SV=3	1.30909	2	2	2	1375	157.212	5.08	108.1	116.5	118.6	81.1	85.3	90.4	114.4	85.6	1.33645	0.00233798
B7Z4Q0			cDNA FLJ55728, highly similar to ADP-ribosylation factor GTPase-activating protein 3 OS=Homo sapiens PE=2 SV=1	14.8649	5	5	5	444	48.939	7.59	109.2	115.2	118.8	82.8	82.8	91.2	114.4	85.6	1.33645	0.00189859
A0A140VKE9			Testis tissue sperm-binding protein Li 66n OS=Homo sapiens PE=2 SV=1	34.326	14	25	14	638	71.412	5.2	116.6	113.9	112.6	78.1	83.1	95.7	114.367	85.6333	1.33554	0.00587135
P36871		PGM1	Phosphoglucomutase-1 OS=Homo sapiens GN=PGM1 PE=1 SV=3	38.2562	19	34	19	562	61.411	6.76	110.2	110.4	122.4	75.1	88.7	93.1	114.333	85.6333	1.33515	0.0131679
P62826		RAN	GTP-binding nuclear protein Ran OS=Homo sapiens GN=RAN PE=1 SV=3	62.5	16	62	16	216	24.408	7.49	109.8	118.5	114.7	86.3	87.2	83.5	114.333	85.6667	1.33463	0.000480821
Q8NB37		GATD1	Glutamine amidotransferase-like class 1 domain-containing protein 1 OS=Homo sapiens GN=GATD1 PE=1 SV=1	13.6364	2	2	2	220	23.283	6.61	120.1	106.6	116.2	84.8	84.4	87.9	114.3	85.7	1.33372	0.00234705
Q00653		NFKB2	Nuclear factor NF-kappa-B p100 subunit OS=Homo sapiens GN=NFKB2 PE=1 SV=4	37.6667	25	37	24	900	96.689	6.25	115.5	109	118.4	82.2	84.8	90.2	114.3	85.7333	1.3332	0.00142908
A0A024R904		CACYBP	Calcyclin binding protein, isoform CRA_a OS=Homo sapiens GN=CACYBP PE=4 SV=1	64.0351	14	24	14	228	26.194	8.25	109.6	114.5	118.7	81	84.7	91.5	114.267	85.7333	1.33281	0.00213157
P34741		SDC2	Syndecan-2 OS=Homo sapiens GN=SDC2 PE=1 SV=2	7.46269	1	2	1	201	22.146	4.86	114	114.2	114.6	89.3	80.6	87.4	114.267	85.7667	1.3323	0.000421783
B2RCD2			cDNA, FLJ96001, highly similar to Homo sapiens pleckstrin homology, Sec7 and coiled-coil domains 4 (PSCD4), mRNA OS=Homo sapiens PE=2 SV=1	2.03046	1	3	1	394	45.613	6.47	106.5	129.5	106.7	86.7	89	81.6	114.233	85.7667	1.33191	0.0230649
B4E2U0			6-phosphogluconate dehydrogenase, decarboxylating OS=Homo sapiens PE=2 SV=1	45.3362	20	46	10	461	50.76	8.18	107.3	113	122.2	76.5	88.1	92.8	114.167	85.8	1.33061	0.0120499
E7ERR0		KLHDC3	Kelch domain-containing protein 3 OS=Homo sapiens GN=KLHDC3 PE=1 SV=2	3.59897	1	1	1	389	43.81	8.07	111.2	110.2	121.1	84.6	77.7	95.1	114.167	85.8	1.33061	0.0098774
P04406		GAPDH	Glyceraldehyde-3-phosphate dehydrogenase OS=Homo sapiens GN=GAPDH PE=1 SV=3	82.6866	28	377	28	335	36.03	8.46	109.7	111	121.8	76.5	90.1	91	114.167	85.8667	1.32958	0.00951192
O60344		ECE2	Endothelin-converting enzyme 2 OS=Homo sapiens GN=ECE2 PE=1 SV=4	1.69875	1	1	1	883	99.71	5.1	104.3	114.4	123.7	91.8	87.6	78.2	114.133	85.8667	1.32919	0.0148604
A8K690			cDNA FLJ76863, highly similar to Homo sapiens stress-induced-phosphoprotein 1 (Hsp70/Hsp90-organizing protein) (STIP1), mRNA OS=Homo sapiens PE=2 SV=1	63.1676	39	83	39	543	62.615	6.8	111.8	110.7	119.9	79.5	85.3	92.8	114.133	85.8667	1.32919	0.00422208
P31150		GDI1	Rab GDP dissociation inhibitor alpha OS=Homo sapiens GN=GDI1 PE=1 SV=2	52.1253	20	51	12	447	50.55	5.14	106	114.3	122.1	78.3	87.5	91.8	114.133	85.8667	1.32919	0.00989406
V9HW37		HEL-S-69	Epididymis secretory protein Li 69 OS=Homo sapiens GN=HEL-S-69 PE=1 SV=1	75.7856	39	113	38	541	59.633	5.66	114.5	110.2	117.6	77.8	89	90.8	114.1	85.8667	1.3288	0.00356633
P13797		PLS3	Plastin-3 OS=Homo sapiens GN=PLS3 PE=1 SV=4	23.8095	12	16	11	630	70.766	5.6	107.4	113.1	121.8	80.5	86.5	90.7	114.1	85.9	1.32829	0.00532852
Q6FHU2		PGAM1	Phosphoglycerate mutase (Fragment) OS=Homo sapiens GN=PGAM1 PE=2 SV=1	73.622	18	99	18	254	28.786	7.18	105.4	115.3	121.5	76	89.2	92.6	114.067	85.9333	1.32739	0.0151332
Q53HV2			Chaperonin containing TCP1, subunit 7 (Eta) variant (Fragment) OS=Homo sapiens PE=2 SV=1	69.4291	35	102	35	543	59.303	7.65	112.9	113.3	115.9	77.6	89.1	91.2	114.033	85.9667	1.32648	0.002921
Q6P996		PDXDC1	Pyridoxal-dependent decarboxylase domain-containing protein 1 OS=Homo sapiens GN=PDXDC1 PE=1 SV=2	39.0863	19	32	19	788	86.652	5.38	111.7	111.8	118.6	79.2	83.8	94.9	114.033	85.9667	1.32648	0.00565988
Q53GG0			Epithelial protein lost in neoplasm beta variant (Fragment) OS=Homo sapiens PE=2 SV=1	55.336	40	73	40	759	85.201	6.84	119.7	111.2	111.1	93.8	75.7	88.4	114	85.9667	1.3261	0.00992117
P23526		AHCY	Adenosylhomocysteinase OS=Homo sapiens GN=AHCY PE=1 SV=4	59.2593	27	101	25	432	47.685	6.34	110.6	111.5	119.9	79.9	86.7	91.3	114	85.9667	1.3261	0.00322464
Q9H9V9		JMJD4	JmjC domain-containing protein 4 OS=Homo sapiens GN=JMJD4 PE=1 SV=2	1.51188	1	1	1	463	52.46	6.21	119.3	114.2	108.5	70.1	90.9	97	114	86	1.32558	0.0325543
A0A024R329		GMPPB	GDP-mannose pyrophosphorylase B, isoform CRA_a OS=Homo sapiens GN=GMPPB PE=4 SV=1	18.863	5	5	5	387	42.594	6.29	114.4	110.1	117.4	79.4	82.5	96.1	113.967	86	1.32519	0.00728222
O95861		BPNT1	3'(2'),5'-bisphosphate nucleotidase 1 OS=Homo sapiens GN=BPNT1 PE=1 SV=1	40.5844	11	15	11	308	33.371	5.69	112.1	113.6	116.1	81.4	86.8	89.9	113.933	86.0333	1.32429	0.000526864
Q8WUP2		FBLIM1	Filamin-binding LIM protein 1 OS=Homo sapiens GN=FBLIM1 PE=1 SV=2	10.4558	3	3	3	373	40.643	6.02	109.8	112.9	119.2	85.9	84.3	88	113.967	86.0667	1.32417	0.000711597
Q9NQW7		XPNPEP1	Xaa-Pro aminopeptidase 1 OS=Homo sapiens GN=XPNPEP1 PE=1 SV=3	32.9053	14	22	7	623	69.873	5.67	107.1	111	123.7	79.5	86.4	92.3	113.933	86.0667	1.32378	0.0110408
Q9H477		RBKS	Ribokinase OS=Homo sapiens GN=RBKS PE=1 SV=1	3.10559	1	1	1	322	34.121	5.05	109.8	115.8	116.2	81.4	79.9	96.9	113.933	86.0667	1.32378	0.00869664
H3BMD8		ARPP19	cAMP-regulated phosphoprotein 19 OS=Homo sapiens GN=ARPP19 PE=1 SV=1	28.2443	2	4	1	131	14.475	8.31	110.7	115.5	115.6	82.9	82.2	93.1	113.933	86.0667	1.32378	0.00198266
A0A0F7G8J1		PLG	Plasminogen OS=Homo sapiens GN=PLG PE=2 SV=1	3.9555	3	5	2	809	90.569	7.36	123.6	114	104.1	93.6	78.6	86	113.9	86.0667	1.32339	0.0172625
A0A024R4I7		LZIC	Leucine zipper and CTNNBIP1 domain containing, isoform CRA_a OS=Homo sapiens GN=LZIC PE=4 SV=1	11.0526	2	3	2	190	21.481	4.94	109.8	116.8	115.1	79.8	85	93.5	113.9	86.1	1.32288	0.00353105
P49773		HINT1	Histidine triad nucleotide-binding protein 1 OS=Homo sapiens GN=HINT1 PE=1 SV=2	79.3651	9	27	9	126	13.793	6.95	109.6	116.6	115.3	88.2	84.9	85.3	113.833	86.1333	1.32159	0.000315576
L0ENG9		TP53	Cellular tumor antigen p53 (Fragment) OS=Homo sapiens GN=TP53 PE=3 SV=1	42.0561	3	5	1	107	11.884	8.09	119.4	113.4	108.8	80.5	79.7	98.3	113.867	86.1667	1.32147	0.0151984
Q96EQ0		SGTB	Small glutamine-rich tetratricopeptide repeat-containing protein beta OS=Homo sapiens GN=SGTB PE=1 SV=1	7.89474	1	1	1	304	33.408	4.92	107	105.8	128.8	77.5	90.8	90.2	113.867	86.1667	1.32147	0.0327323
O95372		LYPLA2	Acyl-protein thioesterase 2 OS=Homo sapiens GN=LYPLA2 PE=1 SV=1	30.7359	6	11	6	231	24.721	7.23	109.6	115	116.9	82.5	86.6	89.4	113.833	86.1667	1.32108	0.000735009
Q9UL63		MKLN1	Muskelin OS=Homo sapiens GN=MKLN1 PE=1 SV=2	5.03401	3	3	3	735	84.713	6.34	106.1	115.8	119.6	83.2	75.1	100.3	113.833	86.2	1.32057	0.0307311
P20042		EIF2S2	Eukaryotic translation initiation factor 2 subunit 2 OS=Homo sapiens GN=EIF2S2 PE=1 SV=2	42.9429	17	32	17	333	38.364	5.8	112	112.8	116.6	88.6	82.2	87.8	113.8	86.2	1.32019	0.000361162
Q9UMZ1			Prothymosin a14 OS=Homo sapiens PE=2 SV=1	14.8515	1	2	1	101	11.052	3.79	106	130.7	104.7	90.8	78.7	89.1	113.8	86.2	1.32019	0.0407856
Q05GC8		BCAR2	Breast cancer anti-estrogen resistance 2 OS=Homo sapiens GN=BCAR2 PE=1 SV=1	0.57377	1	1	1	1220	134.225	6.83	111.9	126.9	102.6	88.7	76.9	93	113.8	86.2	1.32019	0.0321488
B4DQ75		DAP	Death-associated protein 1 OS=Homo sapiens GN=DAP PE=1 SV=1	3.92157	1	1	1	204	23.209	9.54	113.8	106.6	121	88	84.6	86.1	113.8	86.2333	1.31968	0.0029684
O60664		PLIN3	Perilipin-3 OS=Homo sapiens GN=PLIN3 PE=1 SV=3	69.8157	21	70	21	434	47.046	5.44	115.4	110.9	115	88	85.4	85.3	113.767	86.2333	1.31929	8.26541e-05
P35579		MYH9	Myosin-9 OS=Homo sapiens GN=MYH9 PE=1 SV=4	67.1429	168	646	141	1960	226.392	5.6	113.4	107.2	120.7	80.2	85.4	93.1	113.767	86.2333	1.31929	0.00703218
A0A0S2Z4V6		WFS1	Wolfram syndrome 1 isoform 1 (Fragment) OS=Homo sapiens GN=WFS1 PE=2 SV=1	1.1236	1	1	1	890	100.227	8.05	115.3	114.8	111.2	92.4	71.7	94.6	113.767	86.2333	1.31929	0.0205317
P08238		HSP90AB1	Heat shock protein HSP 90-beta OS=Homo sapiens GN=HSP90AB1 PE=1 SV=4	67.6796	55	356	32	724	83.212	5.03	114.9	101.7	124.6	79.7	85.5	93.7	113.733	86.3	1.31788	0.024319
D9YZV5		TPM1	Tropomyosin 1 (Alpha) isoform 4 OS=Homo sapiens GN=TPM1 PE=3 SV=1	47.5352	17	39	4	284	32.856	4.78	118.6	111.2	111.3	97.6	69.8	91.5	113.7	86.3	1.3175	0.035556
B7ZLJ0		DIAPH2	DIAPH2 protein OS=Homo sapiens GN=DIAPH2 PE=2 SV=1	5.80236	5	5	5	1103	125.399	6.51	116.5	110.5	114	80.6	81.9	96.5	113.667	86.3333	1.3166	0.00710604
B2R9K8			cDNA, FLJ94440, highly similar to Homo sapiens chaperonin containing TCP1, subunit 6A (zeta 1)(CCT6A), mRNA OS=Homo sapiens PE=2 SV=1	56.4972	26	72	26	531	57.93	6.8	114.6	112.5	113.9	75.8	89.9	93.4	113.667	86.3667	1.31609	0.0072712
Q9Y678		COPG1	Coatomer subunit gamma-1 OS=Homo sapiens GN=COPG1 PE=1 SV=1	59.0389	40	72	36	874	97.655	5.47	114.7	104.3	122	79.1	85.8	94.2	113.667	86.3667	1.31609	0.0154859
D3DPK5		SH3BGRL3	SH3 domain binding glutamic acid-rich protein like 3, isoform CRA_a (Fragment) OS=Homo sapiens GN=SH3BGRL3 PE=4 SV=1	14.3969	5	9	5	257	26.803	8.38	103.6	119.1	118.3	81.1	82.3	95.7	113.667	86.3667	1.31609	0.0165377
Q96IZ0		PAWR	PRKC apoptosis WT1 regulator protein OS=Homo sapiens GN=PAWR PE=1 SV=1	32.3529	7	11	6	340	36.545	5.41	111.9	106.3	122.7	82	82.8	94.3	113.633	86.3667	1.31571	0.011979
Q6ZNV4			cDNA FLJ27061 fis, clone SPL00925 OS=Homo sapiens PE=2 SV=1	6.06061	1	1	1	132	15.525	10.62	118.6	108.3	113.9	94	75.8	89.3	113.6	86.3667	1.31532	0.0118531
A0A0U1RQM0			Uncharacterized protein OS=Homo sapiens PE=1 SV=1	15.5172	1	1	1	116	12.657	10.24	116.6	102.2	122	84	78.4	96.8	113.6	86.4	1.31481	0.0276606
Q6NS36		FTH1	Ferritin (Fragment) OS=Homo sapiens GN=FTH1 PE=2 SV=1	45.6897	11	25	11	232	26.203	6.52	117.3	118.7	104.7	89.8	82.4	87	113.567	86.4	1.31443	0.00535712
A0A024R1Z1		CDC34	Cell division cycle 34, isoform CRA_a OS=Homo sapiens GN=CDC34 PE=3 SV=1	7.62712	2	2	2	236	26.72	4.54	111.2	108.4	121.1	80.7	87.3	91.3	113.567	86.4333	1.31392	0.00534965
P49721		PSMB2	Proteasome subunit beta type-2 OS=Homo sapiens GN=PSMB2 PE=1 SV=1	36.8159	6	13	6	201	22.822	7.02	113.1	114.5	113.1	81.9	85.4	92.1	113.567	86.4667	1.31342	0.000862783
P29692		EEF1D	Elongation factor 1-delta OS=Homo sapiens GN=EEF1D PE=1 SV=5	65.1246	15	54	6	281	31.103	5.01	115.3	109.1	116.2	80.6	85.8	93	113.533	86.4667	1.31303	0.00306719
P30085		CMPK1	UMP-CMP kinase OS=Homo sapiens GN=CMPK1 PE=1 SV=3	44.898	7	11	7	196	22.208	5.57	107.6	110.9	122	80	92.4	87	113.5	86.4667	1.31264	0.00871303
Q969T3		SNX21	Sorting nexin-21 OS=Homo sapiens GN=SNX21 PE=2 SV=1	4.02145	1	1	1	373	41.34	5.24	113.2	115.9	111.3	86.8	75.7	97.1	113.467	86.5333	1.31125	0.0130479
A0A024R830		IMPA1	Inositol-1-monophosphatase OS=Homo sapiens GN=IMPA1 PE=3 SV=1	21.2996	4	5	4	277	30.169	5.26	112.6	108	119.7	86	83.4	90.3	113.433	86.5667	1.31036	0.00244865
Q14106		TOB2	Protein Tob2 OS=Homo sapiens GN=TOB2 PE=1 SV=2	5.81395	1	1	1	344	36.609	6.93	119.2	105.2	115.8	89.9	86.7	83.1	113.4	86.5667	1.30997	0.00447998
P53041		PPP5C	Serine/threonine-protein phosphatase 5 OS=Homo sapiens GN=PPP5C PE=1 SV=1	38.2766	14	19	14	499	56.842	6.28	106.7	117	116.5	83	81.6	95.3	113.4	86.6333	1.30896	0.00820814
V9HWG3		HEL-S-45	Epididymis secretory protein Li 45 OS=Homo sapiens GN=HEL-S-45 PE=2 SV=1	62.1543	34	139	34	687	77.28	5.22	110.4	109.6	120.1	77	90.1	92.8	113.367	86.6333	1.30858	0.0107714
A0A0A0MSE7		RPAIN	RPA-interacting protein OS=Homo sapiens GN=RPAIN PE=1 SV=1	13.8528	2	2	2	231	26.19	4.97	123.3	113.7	103.1	81.6	90.4	87.9	113.367	86.6333	1.30858	0.0139084
P61221		ABCE1	ATP-binding cassette sub-family E member 1 OS=Homo sapiens GN=ABCE1 PE=1 SV=1	46.2437	20	33	20	599	67.271	8.34	108.7	110.2	121.1	82.5	83.1	94.3	113.333	86.6333	1.3082	0.00818794
P67775		PPP2CA	Serine/threonine-protein phosphatase 2A catalytic subunit alpha isoform OS=Homo sapiens GN=PPP2CA PE=1 SV=1	51.4563	12	35	2	309	35.571	5.54	112.4	110.4	117.1	84.4	84	91.8	113.3	86.7333	1.3063	0.0011785
Q5U0L9			Homer homolog 3 (Drosophila) OS=Homo sapiens PE=2 SV=1	9.69529	3	3	1	361	39.939	5.47	116.1	108.6	115.2	79.2	99.3	81.7	113.3	86.7333	1.3063	0.0170374
A4D0U5		TES	Testis derived transcript (3 LIM domains) OS=Homo sapiens GN=TES PE=4 SV=1	54.1568	18	41	18	421	47.964	7.68	106.5	116.7	116.6	85.6	81.7	92.9	113.267	86.7333	1.30592	0.00490095
F5H5D3		TUBA1C	Tubulin alpha chain OS=Homo sapiens GN=TUBA1C PE=1 SV=1	62.6204	28	252	3	519	57.693	5.07	109.5	112.6	117.7	84.5	87.2	88.6	113.267	86.7667	1.30542	0.000583844
P60174		TPI1	Triosephosphate isomerase OS=Homo sapiens GN=TPI1 PE=1 SV=3	79.7203	22	101	22	286	30.772	5.92	107.1	111.9	120.8	78.6	92.1	89.6	113.267	86.7667	1.30542	0.010091
Q59FT7			Mitogen-activated protein kinase kinase kinase 7 interacting protein 1 isoform alpha variant (Fragment) OS=Homo sapiens PE=2 SV=1	3.85802	1	1	1	648	70.221	5.34	111.5	105.2	122.7	89.2	72.9	98.3	113.133	86.8	1.30338	0.0432916
A0A024R172		LTB4DH	Leukotriene B4 12-hydroxydehydrogenase, isoform CRA_a OS=Homo sapiens GN=LTB4DH PE=4 SV=1	54.4073	16	42	16	329	35.863	8.29	107	115.3	117.2	80.5	90.4	89.6	113.167	86.8333	1.30326	0.00411678
P21291		CSRP1	Cysteine and glycine-rich protein 1 OS=Homo sapiens GN=CSRP1 PE=1 SV=3	64.7668	10	23	3	193	20.554	8.57	119	106.3	114.2	82.9	88.8	88.8	113.167	86.8333	1.30326	0.00328026
P22352		GPX3	Glutathione peroxidase 3 OS=Homo sapiens GN=GPX3 PE=1 SV=2	5.30973	1	3	1	226	25.537	8.13	129.6	108	101.8	89.2	87.2	84.2	113.133	86.8667	1.30238	0.0372156
F8VQZ7		METAP2	Methionine aminopeptidase 2 OS=Homo sapiens GN=METAP2 PE=1 SV=1	46.5409	15	45	1	477	52.787	5.82	102.2	112.1	125	93.9	85.3	81.4	113.1	86.8667	1.302	0.0256192
Q9Y5B8		NME7	Nucleoside diphosphate kinase 7 OS=Homo sapiens GN=NME7 PE=1 SV=1	6.91489	2	2	2	376	42.464	6.47	117.2	108.9	113.2	89.8	78.4	92.5	113.1	86.9	1.3015	0.00607654
Q99615		DNAJC7	DnaJ homolog subfamily C member 7 OS=Homo sapiens GN=DNAJC7 PE=1 SV=2	44.7368	20	28	20	494	56.405	6.96	113.6	107.9	117.9	86.6	82.8	91.4	113.133	86.9333	1.30138	0.00236198
Q8TDQ7		GNPDA2	Glucosamine-6-phosphate isomerase 2 OS=Homo sapiens GN=GNPDA2 PE=1 SV=1	27.5362	6	10	4	276	31.065	6.95	107.8	116.7	114.7	80.3	79.5	100.9	113.067	86.9	1.30111	0.0251985
O00625		PIR	Pirin OS=Homo sapiens GN=PIR PE=1 SV=1	32.4138	7	13	7	290	32.093	6.92	108.8	113.9	116.6	81.8	90.5	88.5	113.1	86.9333	1.301	0.0016853
Q93099		HGD	Homogentisate 1,2-dioxygenase OS=Homo sapiens GN=HGD PE=1 SV=2	27.8652	7	10	7	445	49.932	6.96	109.1	114.4	115.6	80.5	85.2	95.1	113.033	86.9333	1.30023	0.00532082
P24844		MYL9	Myosin regulatory light polypeptide 9 OS=Homo sapiens GN=MYL9 PE=1 SV=4	66.2791	10	26	5	172	19.814	4.92	103.6	118.2	117.3	93.8	76.9	90.2	113.033	86.9667	1.29973	0.0202236
Q9BVG4		PBDC1	Protein PBDC1 OS=Homo sapiens GN=PBDC1 PE=1 SV=1	37.3391	8	13	8	233	26.041	4.79	108.8	113.3	117	87	84.1	89.8	113.033	86.9667	1.29973	0.000832341
Q9BVA1		TUBB2B	Tubulin beta-2B chain OS=Homo sapiens GN=TUBB2B PE=1 SV=1	82.6966	29	327	1	445	49.921	4.89	111.9	114.8	112.3	86.4	88	86.6	113	87	1.29885	1.50599e-05
O75822		EIF3J	Eukaryotic translation initiation factor 3 subunit J OS=Homo sapiens GN=EIF3J PE=1 SV=2	35.6589	7	15	7	258	29.045	4.83	108.1	115.5	115.4	84.7	79.5	96.8	113	87	1.29885	0.0102053
Q00688		FKBP3	Peptidyl-prolyl cis-trans isomerase FKBP3 OS=Homo sapiens GN=FKBP3 PE=1 SV=1	64.7321	15	34	15	224	25.161	9.28	112.8	112.7	113.5	92.7	84.4	84	113	87.0333	1.29835	0.000801512
A0A024R3V8		TSNAX	Translin-associated factor X, isoform CRA_c OS=Homo sapiens GN=TSNAX PE=4 SV=1	60.6897	14	20	14	290	33.092	6.55	106.8	115	117	81	85	95	112.933	87	1.29808	0.00757413
A0A140VJT8			Testicular tissue protein Li 164 OS=Homo sapiens PE=2 SV=1	62.9067	20	41	20	461	49.941	4.82	111.3	110.5	117	80.9	87.2	93	112.933	87.0333	1.29759	0.0030673
Q03188		CENPC	Centromere protein C OS=Homo sapiens GN=CENPC PE=1 SV=2	1.16649	1	1	1	943	106.769	9.39	107.6	119.1	112.1	94.4	79.5	87.3	112.933	87.0667	1.29709	0.00899956
P04075		ALDOA	Fructose-bisphosphate aldolase A OS=Homo sapiens GN=ALDOA PE=1 SV=2	87.3626	34	218	28	364	39.395	8.09	109.8	109.1	119.8	80.3	86.7	94.2	112.9	87.0667	1.29671	0.00818846
V9HW25		HEL-S-273	Epididymis secretory protein Li 273 OS=Homo sapiens GN=HEL-S-273 PE=2 SV=1	52.8169	21	39	1	284	32.97	4.67	113.2	108.4	117.1	99.3	72.6	89.4	112.9	87.1	1.29621	0.0344954
E7ESC7		MAEA	Macrophage erythroblast attacher OS=Homo sapiens GN=MAEA PE=1 SV=1	3.45622	1	1	1	434	49.361	8.98	120.9	107.8	109.8	80.1	85.4	96	112.833	87.1667	1.29446	0.0143846
P55327		TPD52	Tumor protein D52 OS=Homo sapiens GN=TPD52 PE=1 SV=2	50.4464	9	15	6	224	24.312	4.83	118.9	105.9	113.6	90.5	86.3	84.8	112.8	87.2	1.29358	0.00348071
O43187		IRAK2	Interleukin-1 receptor-associated kinase-like 2 OS=Homo sapiens GN=IRAK2 PE=1 SV=2	8.16	3	3	3	625	69.389	5.72	111	115.3	112.1	81.2	84.7	95.7	112.8	87.2	1.29358	0.00492688
P63104		YWHAZ	14-3-3 protein zeta/delta OS=Homo sapiens GN=YWHAZ PE=1 SV=1	73.0612	22	126	17	245	27.728	4.79	108.5	112.6	117.2	76.6	92.2	92.9	112.767	87.2333	1.2927	0.0122587
E7EVA0		MAP4	Microtubule-associated protein OS=Homo sapiens GN=MAP4 PE=1 SV=1	26.4258	45	103	34	2297	245.292	6.23	112.8	112	113.5	84.9	82.9	94	112.767	87.2667	1.29221	0.0017734
A0A0K0K1K7		HEL-S-304	6-phosphogluconolactonase, isoform CRA_b OS=Homo sapiens GN=HEL-S-304 PE=2 SV=1	47.2868	9	23	9	258	27.53	6.05	106.7	116.8	114.8	76.7	92.8	92.3	112.767	87.2667	1.29221	0.0140782
Q9BX95		SGPP1	Sphingosine-1-phosphate phosphatase 1 OS=Homo sapiens GN=SGPP1 PE=1 SV=2	3.85488	1	1	1	441	49.076	8.82	112.9	118	107.3	91.7	83	87.1	112.733	87.2667	1.29183	0.00307114
B2R9X3			cDNA, FLJ94599, highly similar to Homo sapiens GDP-mannose 4,6-dehydratase (GMDS), mRNA OS=Homo sapiens PE=2 SV=1	21.2366	7	8	7	372	41.824	7.12	112.6	114.8	110.8	83.5	84.1	94.2	112.733	87.2667	1.29183	0.00223884
E9PSG9		POLR2M	DNA-directed RNA polymerase II subunit GRINL1A, isoforms 4/5 OS=Homo sapiens GN=POLR2M PE=1 SV=1	15.0943	1	1	1	159	16.161	8.21	120.7	113.6	103.8	90.6	76.9	94.4	112.7	87.3	1.29095	0.0245824
P07108		DBI	Acyl-CoA-binding protein OS=Homo sapiens GN=DBI PE=1 SV=2	71.2644	6	16	6	87	10.038	6.57	104.3	113.7	120.1	82.4	88.9	90.6	112.7	87.3	1.29095	0.00826974
Q13596		SNX1	Sorting nexin-1 OS=Homo sapiens GN=SNX1 PE=1 SV=3	13.7931	6	8	4	522	59.033	5.15	111.6	107.9	118.5	83	86.5	92.5	112.667	87.3333	1.29008	0.00369097
Q969U7		PSMG2	Proteasome assembly chaperone 2 OS=Homo sapiens GN=PSMG2 PE=1 SV=1	16.2879	4	6	4	264	29.377	6.98	108.6	112	117.4	89.7	80.2	92.1	112.667	87.3333	1.29008	0.00468711
Q13627		DYRK1A	Dual specificity tyrosine-phosphorylation-regulated kinase 1A OS=Homo sapiens GN=DYRK1A PE=1 SV=2	2.35911	1	1	1	763	85.53	8.75	112.8	109.5	115.7	90.1	79	92.9	112.667	87.3333	1.29008	0.00533104
O43707		ACTN4	Alpha-actinin-4 OS=Homo sapiens GN=ACTN4 PE=1 SV=2	70.3622	61	297	23	911	104.788	5.44	114.6	107.7	115.6	82	90.5	89.7	112.633	87.4	1.28871	0.00235812
Q01970		PLCB3	1-phosphatidylinositol 4,5-bisphosphate phosphodiesterase beta-3 OS=Homo sapiens GN=PLCB3 PE=1 SV=2	21.718	17	29	17	1234	138.713	5.9	111.8	110.7	115.3	83.9	84.3	94.1	112.6	87.4333	1.28784	0.00223106
Q04446		GBE1	1,4-alpha-glucan-branching enzyme OS=Homo sapiens GN=GBE1 PE=1 SV=3	10.2564	4	5	4	702	80.423	6.32	112.8	105.5	119.5	80.7	89	92.6	112.6	87.4333	1.28784	0.00935707
P26038		MSN	Moesin OS=Homo sapiens GN=MSN PE=1 SV=3	74.3501	56	170	43	577	67.778	6.4	106.9	109.8	121	81.6	89.9	90.8	112.567	87.4333	1.28746	0.00844934
Q99426		TBCB	Tubulin-folding cofactor B OS=Homo sapiens GN=TBCB PE=1 SV=2	25.4098	4	7	4	244	27.308	5.15	104.7	115.1	117.8	78.6	86.8	97	112.533	87.4667	1.28659	0.0196502
Q9BUK6		MSTO1	Protein misato homolog 1 OS=Homo sapiens GN=MSTO1 PE=1 SV=1	2.10526	1	1	1	570	61.796	6.11	116.1	103	118.5	77.3	87.4	97.7	112.533	87.4667	1.28659	0.0300808
Q9Y3F4		STRAP	Serine-threonine kinase receptor-associated protein OS=Homo sapiens GN=STRAP PE=1 SV=1	74.8571	20	48	20	350	38.414	5.12	118.1	103.9	115.6	82.9	90.2	89.3	112.533	87.4667	1.28659	0.0071259
O60232		SSSCA1	Sjoegren syndrome/scleroderma autoantigen 1 OS=Homo sapiens GN=SSSCA1 PE=1 SV=1	70.3518	7	17	7	199	21.461	5.24	107.7	112.2	117.7	74.2	88.5	99.8	112.533	87.5	1.2861	0.0345705
Q96H79		ZC3HAV1L	Zinc finger CCCH-type antiviral protein 1-like OS=Homo sapiens GN=ZC3HAV1L PE=1 SV=2	52.3333	11	15	11	300	32.94	8.13	108.7	114.2	114.6	96.7	78	87.8	112.5	87.5	1.28571	0.0120049
Q8WX93		PALLD	Palladin OS=Homo sapiens GN=PALLD PE=1 SV=3	2.38612	2	2	2	1383	150.47	7.09	108.6	113.5	115.3	86.2	75.9	100.4	112.467	87.5	1.28533	0.0276975
P17987		TCP1	T-complex protein 1 subunit alpha OS=Homo sapiens GN=TCP1 PE=1 SV=1	76.4388	35	101	35	556	60.306	6.11	112.6	110.9	113.9	79	88.2	95.5	112.467	87.5667	1.28435	0.00682965
V9HW29		HEL-S-61	Kinesin-like protein OS=Homo sapiens GN=HEL-S-61 PE=1 SV=1	52.3364	41	78	41	963	109.617	6.51	110.5	107.6	119.3	80.7	86.1	95.9	112.467	87.5667	1.28435	0.011779
Q4LE43		PLCG1	Phosphoinositide phospholipase C (Fragment) OS=Homo sapiens GN=PLCG1 variant protein PE=2 SV=1	8.2153	7	7	7	1412	161.201	7.18	112	110.6	114.6	84.9	78.9	98.9	112.4	87.5667	1.28359	0.0147163
Q5T0D9		TPRG1L	Tumor protein p63-regulated gene 1-like protein OS=Homo sapiens GN=TPRG1L PE=1 SV=1	24.2647	3	3	3	272	30.193	7.34	113.3	109.9	114	85.3	77.2	100.4	112.4	87.6333	1.28262	0.0231353
Q2VIP3			Polyadenylate-binding protein (Fragment) OS=Homo sapiens PE=3 SV=1	28.5714	18	48	4	630	69.888	9.67	107.4	108	121.7	99.1	79.2	84.6	112.367	87.6333	1.28224	0.0307056
Q9H910		JPT2	Jupiter microtubule associated homolog 2 OS=Homo sapiens GN=JPT2 PE=1 SV=1	71.5789	10	21	3	190	20.051	9.26	109.8	114.5	112.8	93.8	79.8	89.3	112.367	87.6333	1.28224	0.00472113
P0CG34		TMSB15A	Thymosin beta-15A OS=Homo sapiens GN=TMSB15A PE=1 SV=1	46.6667	2	2	2	45	5.226	5.36	112.1	122.2	102.8	85.2	91.1	86.6	112.367	87.6333	1.28224	0.0136091
B7Z3K9			Fructose-bisphosphate aldolase OS=Homo sapiens PE=2 SV=1	48.5588	20	104	14	451	48.378	8.07	104.7	115.1	117.2	78.9	86.5	97.6	112.333	87.6667	1.28137	0.0208135
V9HW43		HEL-S-102	Epididymis secretory protein Li 102 OS=Homo sapiens GN=HEL-S-102 PE=2 SV=1	68.7805	16	67	16	205	22.768	6.4	107.4	111.7	117.9	78.6	91.2	93.2	112.333	87.6667	1.28137	0.0109006
A0A140VK69			Aspartate aminotransferase OS=Homo sapiens PE=2 SV=1	49.6368	16	32	16	413	46.219	7.01	108.5	111.4	117	76.6	88.2	98.2	112.3	87.6667	1.28099	0.021485
J3QQX2		ARHGDIA	Rho GDP-dissociation inhibitor 1 OS=Homo sapiens GN=ARHGDIA PE=1 SV=1	39.1489	8	30	8	235	25.815	7.44	103.9	114.2	118.9	78.8	90.5	93.8	112.333	87.7	1.28088	0.0178587
Q9UNF0		PACSIN2	Protein kinase C and casein kinase substrate in neurons protein 2 OS=Homo sapiens GN=PACSIN2 PE=1 SV=2	35.5967	13	18	13	486	55.704	5.2	108.5	111.8	116.7	83.5	88.5	91.1	112.333	87.7	1.28088	0.0016497
P68371		TUBB4B	Tubulin beta-4B chain OS=Homo sapiens GN=TUBB4B PE=1 SV=1	82.6966	29	369	3	445	49.799	4.89	107.6	111.8	117.5	83.1	87.2	92.8	112.3	87.7	1.2805	0.00360048
P67936		TPM4	Tropomyosin alpha-4 chain OS=Homo sapiens GN=TPM4 PE=1 SV=3	67.7419	26	56	12	248	28.504	4.69	108.6	114.6	113.6	86.5	81.3	95.3	112.267	87.7	1.28012	0.00541837
A0A024R1K7		YWHAH	Tyrosine 3-monooxygenase/tryptophan 5-monooxygenase activation protein, eta polypeptide, isoform CRA_b OS=Homo sapiens GN=YWHAH PE=3 SV=1	63.8211	16	73	12	246	28.201	4.84	106.4	116	114.4	81.1	87.9	94.2	112.267	87.7333	1.27964	0.00697459
A8K7Z3			cDNA FLJ77229, highly similar to Homo sapiens GRIP1 associated protein 1 (GRIPAP1), transcript variant 1, mRNA OS=Homo sapiens PE=2 SV=1	13.5553	8	11	8	841	95.932	5.07	105.7	122.3	108.8	85.5	83	94.7	112.267	87.7333	1.27964	0.0168513
A0MZ66		SHTN1	Shootin-1 OS=Homo sapiens GN=SHTN1 PE=1 SV=4	21.7116	11	12	11	631	71.596	5.33	105.8	114.6	116.3	82.4	86.4	94.4	112.233	87.7333	1.27926	0.00695819
Q9H2J4		PDCL3	Phosducin-like protein 3 OS=Homo sapiens GN=PDCL3 PE=1 SV=1	12.5523	2	2	2	239	27.597	4.84	112.5	110	114.3	77.9	81.9	103.5	112.267	87.7667	1.27915	0.038245
C9JIF9		APEH	Acylamino-acid-releasing enzyme OS=Homo sapiens GN=APEH PE=1 SV=1	30.3935	15	27	15	737	81.622	5.54	106.2	113.6	116.9	85	85.7	92.6	112.233	87.7667	1.27877	0.00357148
P00558		PGK1	Phosphoglycerate kinase 1 OS=Homo sapiens GN=PGK1 PE=1 SV=3	80.3357	32	128	32	417	44.586	8.1	108.8	108.5	119.3	77.2	93.2	92.9	112.2	87.7667	1.27839	0.0184934
O14562		UBFD1	Ubiquitin domain-containing protein UBFD1 OS=Homo sapiens GN=UBFD1 PE=1 SV=2	27.8317	5	10	5	309	33.361	5.77	107.1	114.5	115.1	83.1	88.5	91.8	112.233	87.8	1.27828	0.00249185
A0A0C4DFN3		MGLL	Monoglyceride lipase OS=Homo sapiens GN=MGLL PE=1 SV=1	12.4601	3	5	3	313	34.271	6.58	120.9	103	112.8	94.4	79.8	89.2	112.233	87.8	1.27828	0.0219469
P46937		YAP1	Transcriptional coactivator YAP1 OS=Homo sapiens GN=YAP1 PE=1 SV=2	31.1508	9	14	9	504	54.427	5.17	103.3	116.4	116.9	92.5	79	91.9	112.2	87.8	1.2779	0.0175937
A0A024RBR3		DENR	Density-regulated protein OS=Homo sapiens GN=DENR PE=3 SV=1	37.3737	6	8	6	198	22.078	5.3	105.6	118.2	112.8	79.2	89.1	95.1	112.2	87.8	1.2779	0.0144281
Q96EV2		RBM33	RNA-binding protein 33 OS=Homo sapiens GN=RBM33 PE=1 SV=3	10.9402	7	8	7	1170	129.906	6.93	117.8	108.2	110.6	92.2	88.7	82.5	112.2	87.8	1.2779	0.00380778
P40925		MDH1	Malate dehydrogenase, cytoplasmic OS=Homo sapiens GN=MDH1 PE=1 SV=4	50.2994	16	58	16	334	36.403	7.36	111.5	109.5	115.5	84.3	88.7	90.5	112.167	87.8333	1.27704	0.00067348
A0A140VK27			Leukotriene A(4) hydrolase OS=Homo sapiens PE=2 SV=1	57.4468	28	60	28	611	69.241	6.18	109.3	109.9	117.2	76.4	91.2	95.9	112.133	87.8333	1.27666	0.0191619
Q9BRP1		PDCD2L	Programmed cell death protein 2-like OS=Homo sapiens GN=PDCD2L PE=1 SV=1	12.0112	2	3	2	358	39.391	4.86	109.6	113.9	112.9	90.9	76.1	96.6	112.133	87.8667	1.27618	0.0177607
Q59HH3			Trifunctional purine biosynthetic protein adenosine-3 (Fragment) OS=Homo sapiens PE=2 SV=1	55.8317	45	100	45	1046	112.067	7.36	112	106	118.3	78.6	89.8	95.2	112.1	87.8667	1.2758	0.0159873
A8K940			cDNA FLJ77630, highly similar to Homo sapiens BPY2 interacting protein 1, mRNA OS=Homo sapiens PE=1 SV=1	3.49386	3	3	3	1059	112.158	7.3	107.2	114.9	114.2	89.8	81.7	92.1	112.1	87.8667	1.2758	0.00374334
B4DRM3			cDNA FLJ54492, highly similar to Eukaryotic translation initiation factor 4B OS=Homo sapiens PE=2 SV=1	24.513	13	23	13	616	69.685	5.67	107.4	114.4	114.5	80.2	83.4	100.2	112.1	87.9333	1.27483	0.021897
Q5T6F2		UBAP2	Ubiquitin-associated protein 2 OS=Homo sapiens GN=UBAP2 PE=1 SV=1	21.0009	13	21	13	1119	117.044	7.34	115.6	106.9	113.7	84.9	84.5	94.4	112.067	87.9333	1.27445	0.00445447
Q9NR12		PDLIM7	PDZ and LIM domain protein 7 OS=Homo sapiens GN=PDLIM7 PE=1 SV=1	39.8249	15	21	15	457	49.813	8.41	111.4	111.1	113.7	86.9	84.9	92	112.067	87.9333	1.27445	0.000441412
A0AVT1		UBA6	Ubiquitin-like modifier-activating enzyme 6 OS=Homo sapiens GN=UBA6 PE=1 SV=1	22.1483	19	22	19	1052	117.895	6.14	107.9	109.5	118.7	80.5	87.6	95.7	112.033	87.9333	1.27407	0.0120972
A0A024R6Z0		DYNC1LI2	Dynein, cytoplasmic 1, light intermediate chain 2, isoform CRA_a OS=Homo sapiens GN=DYNC1LI2 PE=4 SV=1	30.0813	10	14	9	492	54.066	6.38	108.8	114.2	113.1	81.7	84.7	97.4	112.033	87.9333	1.27407	0.00904812
Q6PGP7		TTC37	Tetratricopeptide repeat protein 37 OS=Homo sapiens GN=TTC37 PE=1 SV=1	1.34271	2	2	2	1564	175.375	7.53	105.4	116.5	114.3	83	80.1	100.8	112.067	87.9667	1.27397	0.0299808
P61981		YWHAG	14-3-3 protein gamma OS=Homo sapiens GN=YWHAG PE=1 SV=2	62.753	18	80	12	247	28.285	4.89	104.8	114.7	116.6	79.2	91.5	93.2	112.033	87.9667	1.27359	0.0136964
Q53EZ4		CEP55	Centrosomal protein of 55 kDa OS=Homo sapiens GN=CEP55 PE=1 SV=3	20.0431	7	14	7	464	54.145	7.01	111.7	110.5	113.9	95.9	79	89	112.033	87.9667	1.27359	0.00859988
Q8ND04		SMG8	Protein SMG8 OS=Homo sapiens GN=SMG8 PE=1 SV=1	3.02725	2	3	2	991	109.614	7.68	107.4	109.8	118.9	85.8	83.8	94.3	112.033	87.9667	1.27359	0.00718442
A8K8N3			cDNA FLJ78740, highly similar to Homo sapiens sperm associated antigen 5 (SPAG5), mRNA OS=Homo sapiens PE=2 SV=1	2.09556	2	2	2	1193	134.312	5	122.7	105.8	107.6	90	78.2	95.7	112.033	87.9667	1.27359	0.0317567
E9PES4		KIF3A	Kinesin-like protein OS=Homo sapiens GN=KIF3A PE=1 SV=1	7.7135	5	5	4	726	82.743	6.44	113.7	109.4	112.9	82	84.7	97.2	112	87.9667	1.27321	0.00781431
P07814		EPRS	Bifunctional glutamate/proline--tRNA ligase OS=Homo sapiens GN=EPRS PE=1 SV=5	50.1323	64	141	64	1512	170.483	7.33	114.3	105.4	116.4	85.7	87.2	91.1	112.033	88	1.27311	0.00300339
G3V5Z7		PSMA6	Proteasome subunit alpha type OS=Homo sapiens GN=PSMA6 PE=1 SV=1	55.5556	13	40	13	252	28.129	6.76	109.2	115	111.9	84.8	89.8	89.4	112.033	88	1.27311	0.000489932
B2R9H3			cDNA, FLJ94391, highly similar to Homo sapiens serine (or cysteine) proteinase inhibitor, clade B (ovalbumin), member 8 (SERPINB8), mRNA OS=Homo sapiens PE=2 SV=1	25.6684	8	13	6	374	42.727	5.47	107	114.8	114.3	76.5	89.2	98.3	112.033	88	1.27311	0.0242012
Q02952		AKAP12	A-kinase anchor protein 12 OS=Homo sapiens GN=AKAP12 PE=1 SV=4	60.4377	77	191	38	1782	191.367	4.41	112.1	109.2	114.7	83	86.4	94.6	112	88	1.27273	0.00318863
A0A140VKE1			Testis tissue sperm-binding protein Li 58p OS=Homo sapiens PE=2 SV=1	28.5714	11	15	11	497	55.642	7.88	103.9	114.8	117.3	79.1	88.8	96.1	112	88	1.27273	0.020111
Q149N5		DOCK4	DOCK4 protein OS=Homo sapiens GN=DOCK4 PE=2 SV=1	0.497265	1	1	1	2011	229.946	7.8	124.8	109	102.2	91.1	92.8	80.1	112	88	1.27273	0.0368753
B3KRM2			Serine/threonine-protein phosphatase OS=Homo sapiens PE=2 SV=1	48.8673	11	31	1	309	35.536	5.43	113.3	103.5	119.1	78.8	90.5	94.8	111.967	88.0333	1.27187	0.0222489
Q14247		CTTN	Src substrate cortactin OS=Homo sapiens GN=CTTN PE=1 SV=2	48.7273	26	49	26	550	61.549	5.4	115.4	109.4	111.1	92.5	81.8	89.8	111.967	88.0333	1.27187	0.00287081
Q9HC07		TMEM165	Transmembrane protein 165 OS=Homo sapiens GN=TMEM165 PE=1 SV=1	30.8642	7	15	2	324	34.883	7.02	114.6	111.3	110	98	77	89.1	111.967	88.0333	1.27187	0.0185088
Q9NPQ8		RIC8A	Synembryn-A OS=Homo sapiens GN=RIC8A PE=1 SV=3	12.806	5	8	5	531	59.671	5.33	109.5	113.3	113.1	81.8	88.8	93.5	111.967	88.0333	1.27187	0.00270335
P52732		KIF11	Kinesin-like protein KIF11 OS=Homo sapiens GN=KIF11 PE=1 SV=2	21.6856	17	19	17	1056	119.085	5.64	112.8	105.3	117.7	80.5	83.7	100	111.933	88.0667	1.27101	0.0274341
B3KW93			Sodium/potassium-transporting ATPase subunit alpha OS=Homo sapiens PE=2 SV=1	19.5652	15	49	2	920	101.237	5.63	110.8	107.3	117.7	96.9	81.6	85.8	111.933	88.1	1.27053	0.012258
P53611		RABGGTB	Geranylgeranyl transferase type-2 subunit beta OS=Homo sapiens GN=RABGGTB PE=1 SV=2	10.574	3	4	3	331	36.9	5.03	112.9	109.8	113	85.1	88	91.2	111.9	88.1	1.27015	0.00031515
P12268		IMPDH2	Inosine-5'-monophosphate dehydrogenase 2 OS=Homo sapiens GN=IMPDH2 PE=1 SV=2	53.3074	24	53	22	514	55.77	6.9	112	107.5	116.1	78.4	89.1	96.9	111.867	88.1333	1.26929	0.0159154
B5BUI8		DUSP3	Dual specificity phosphatase 3 (Fragment) OS=Homo sapiens GN=DUSP3 PE=2 SV=1	37.2973	5	11	5	185	20.564	8.15	105.1	115.4	115.1	80.5	93.9	90	111.867	88.1333	1.26929	0.0104713
O00743		PPP6C	Serine/threonine-protein phosphatase 6 catalytic subunit OS=Homo sapiens GN=PPP6C PE=1 SV=1	33.4426	7	9	7	305	35.121	5.69	111.8	110	113.8	92.3	86.1	86	111.867	88.1333	1.26929	0.000545288
O00458		IFRD1	Interferon-related developmental regulator 1 OS=Homo sapiens GN=IFRD1 PE=1 SV=4	5.32151	2	2	2	451	50.236	7.18	112.6	106.3	116.6	79	85.5	99.9	111.833	88.1333	1.26891	0.0259947
Q99961		SH3GL1	Endophilin-A2 OS=Homo sapiens GN=SH3GL1 PE=1 SV=1	41.8478	13	24	13	368	41.464	5.43	109.2	111	115.4	83.5	86.3	94.7	111.867	88.1667	1.26881	0.00348678
A0A140VKA6			Testis secretory sperm-binding protein Li 233m OS=Homo sapiens PE=2 SV=1	28.1843	10	23	10	369	41.305	5.27	108.4	112.1	115	83.5	87.7	93.3	111.833	88.1667	1.26843	0.00229181
Q6XQN6		NAPRT	Nicotinate phosphoribosyltransferase OS=Homo sapiens GN=NAPRT PE=1 SV=2	23.9777	8	13	8	538	57.542	5.68	109	116.4	110.1	73.6	90.4	100.5	111.833	88.1667	1.26843	0.04437
Q9HB72			PNAS-106 OS=Homo sapiens PE=2 SV=1	14.4737	1	2	1	76	8.463	10.18	109.8	114.9	110.8	86.2	93.1	85.2	111.833	88.1667	1.26843	0.0012812
Q9GZV1		ANKRD2	Ankyrin repeat domain-containing protein 2 OS=Homo sapiens GN=ANKRD2 PE=1 SV=3	50.8333	13	21	13	360	39.835	6.09	106.7	111.3	117.4	81.5	83.1	100	111.8	88.2	1.26757	0.0241703
A0A1U9X8P6			TRIM26 OS=Homo sapiens PE=4 SV=1	9.09091	4	4	4	539	62.141	5.03	110.7	109.5	115.1	91	84.8	88.8	111.767	88.2	1.2672	0.000693252
Q14657		LAGE3	EKC/KEOPS complex subunit LAGE3 OS=Homo sapiens GN=LAGE3 PE=1 SV=2	16.0839	1	1	1	143	14.795	8.63	114.5	110.9	110	84.1	88.9	91.7	111.8	88.2333	1.26709	0.000833882
P07737		PFN1	Profilin-1 OS=Homo sapiens GN=PFN1 PE=1 SV=2	95.7143	16	129	16	140	15.045	8.27	103.8	115.2	116.2	82.6	88.9	93.2	111.733	88.2333	1.26634	0.0094987
B4DT57			cDNA FLJ61383, highly similar to Serine/threonine-protein kinase 24 (EC 2.7.11.1) OS=Homo sapiens PE=2 SV=1	33.3333	12	23	6	450	49.967	5.6	110.6	113.6	111	84.5	87.3	92.9	111.733	88.2333	1.26634	0.000883324
Q14019		COTL1	Coactosin-like protein OS=Homo sapiens GN=COTL1 PE=1 SV=3	71.831	13	37	13	142	15.935	5.67	106.3	113.9	115.1	84	89.9	90.9	111.767	88.2667	1.26624	0.00255208
P31689		DNAJA1	DnaJ homolog subfamily A member 1 OS=Homo sapiens GN=DNAJA1 PE=1 SV=2	59.6977	22	65	22	397	44.839	7.08	114.9	104.3	116	90.2	86.9	87.8	111.733	88.3	1.26538	0.00371202
Q02790		FKBP4	Peptidyl-prolyl cis-trans isomerase FKBP4 OS=Homo sapiens GN=FKBP4 PE=1 SV=3	68.1917	30	81	30	459	51.772	5.43	110	108.9	116.2	80.6	93.2	91.1	111.7	88.3	1.26501	0.00657557
P48507		GCLM	Glutamate--cysteine ligase regulatory subunit OS=Homo sapiens GN=GCLM PE=1 SV=1	20.8029	4	10	4	274	30.708	6.02	104.6	113.2	117.3	80.2	91.7	93	111.7	88.3	1.26501	0.0133291
Q15126		PMVK	Phosphomevalonate kinase OS=Homo sapiens GN=PMVK PE=1 SV=3	17.1875	3	3	3	192	21.981	5.73	106.9	114.4	113.6	78.8	91.7	94.5	111.633	88.3333	1.26377	0.0124029
Q9NP97		DYNLRB1	Dynein light chain roadblock-type 1 OS=Homo sapiens GN=DYNLRB1 PE=1 SV=3	83.3333	5	11	5	96	10.915	7.25	106.7	117.7	110.5	83.5	84.3	97.3	111.633	88.3667	1.2633	0.0134858
Q6IPI1		RPL29	60S ribosomal protein L29 OS=Homo sapiens GN=RPL29 PE=2 SV=1	29.8137	5	17	5	161	17.94	11.66	110.7	110.2	114	96.6	82.4	86.2	111.633	88.4	1.26282	0.00621138
P50990		CCT8	T-complex protein 1 subunit theta OS=Homo sapiens GN=CCT8 PE=1 SV=4	73.3577	40	111	40	548	59.583	5.6	110.1	109.7	115	80.5	89.7	95	111.6	88.4	1.26244	0.0070746
Q13045		FLII	Protein flightless-1 homolog OS=Homo sapiens GN=FLII PE=1 SV=2	33.6485	31	60	16	1269	144.659	6.05	107.3	113.6	113.7	82.5	86.4	96.5	111.533	88.4667	1.26074	0.00786695
A0A024R6D1		NEK9	NIMA (Never in mitosis gene a)-related kinase 9, isoform CRA_a OS=Homo sapiens GN=NEK9 PE=4 SV=1	2.75792	2	2	2	979	107.081	5.73	112.4	114.2	108	87	78	100.5	111.533	88.5	1.26026	0.0275076
A0A0S2Z4I4		TPM3	Tropomyosin 3 isoform 3 (Fragment) OS=Homo sapiens GN=TPM3 PE=2 SV=1	65.7258	29	77	9	248	28.853	4.75	110.4	111.7	112.4	90.7	80.3	94.5	111.5	88.5	1.25989	0.00581421
Q7Z4H7		HAUS6	HAUS augmin-like complex subunit 6 OS=Homo sapiens GN=HAUS6 PE=1 SV=2	4.60733	3	3	3	955	108.553	6.47	107.5	112.5	114.5	84.1	81.6	99.8	111.5	88.5	1.25989	0.0192251
O60502		MGEA5	Protein O-GlcNAcase OS=Homo sapiens GN=MGEA5 PE=1 SV=2	28.0568	16	24	16	916	102.849	4.91	106.5	111	117	80.6	89.1	95.9	111.5	88.5333	1.25941	0.0128805
O60925		PFDN1	Prefoldin subunit 1 OS=Homo sapiens GN=PFDN1 PE=1 SV=2	58.1967	8	10	8	122	14.202	6.81	108.4	114.7	111.4	84.5	88.8	92.3	111.5	88.5333	1.25941	0.00137196
D9IAI1		PEBP1	Epididymis secretory protein Li 34 OS=Homo sapiens GN=PEBP1 PE=2 SV=1	75.4011	11	35	11	187	21.044	7.53	100.5	115.7	118	79.9	96	89.8	111.4	88.5667	1.25781	0.0340978
O96033		MOCS2	Molybdopterin synthase sulfur carrier subunit OS=Homo sapiens GN=MOCS2 PE=1 SV=1	28.4091	2	3	2	88	9.749	4.72	103	118.9	112.4	85.5	82	98.3	111.433	88.6	1.25771	0.0279841
P20618		PSMB1	Proteasome subunit beta type-1 OS=Homo sapiens GN=PSMB1 PE=1 SV=2	38.5892	7	20	7	241	26.472	8.13	120.6	106.2	107.4	81	91.5	93.3	111.4	88.6	1.25734	0.019095
Q9H9T3		ELP3	Elongator complex protein 3 OS=Homo sapiens GN=ELP3 PE=1 SV=2	15.3565	6	7	6	547	62.219	8.88	110.9	110.4	112.9	86	90.5	89.3	111.4	88.6	1.25734	0.000123369
A0A024R4U3		TTLL12	Tubulin tyrosine ligase-like family, member 12, isoform CRA_a OS=Homo sapiens GN=TTLL12 PE=4 SV=1	42.5466	20	32	20	644	74.356	5.53	110.6	109	114.6	82.8	90.3	92.7	111.4	88.6	1.25734	0.0026166
Q9Y490		TLN1	Talin-1 OS=Homo sapiens GN=TLN1 PE=1 SV=3	60.2519	113	222	111	2541	269.599	6.07	110.2	106.3	117.6	80.8	89.5	95.6	111.367	88.6333	1.25649	0.0137946
Q9H832		UBE2Z	Ubiquitin-conjugating enzyme E2 Z OS=Homo sapiens GN=UBE2Z PE=1 SV=2	24.0113	8	9	8	354	38.186	5.62	110.3	109.5	114.3	92.4	86.2	87.3	111.367	88.6333	1.25649	0.000714571
Q6IC98		GRAMD4	GRAM domain-containing protein 4 OS=Homo sapiens GN=GRAMD4 PE=1 SV=1	2.94118	1	1	1	578	66.366	8.84	111.9	120.6	101.5	95	79.1	91.9	111.333	88.6667	1.25564	0.0369345
Q59FV6			ARP3 actin-related protein 3 homolog variant (Fragment) OS=Homo sapiens PE=2 SV=1	65.0407	19	41	1	369	42.231	5.87	110.9	108.4	114.6	79.6	92.8	93.6	111.3	88.6667	1.25526	0.00977249
O95394		PGM3	Phosphoacetylglucosamine mutase OS=Homo sapiens GN=PGM3 PE=1 SV=1	24.3542	8	12	8	542	59.814	6.25	106.3	112.4	115.2	84.4	88	93.7	111.3	88.7	1.25479	0.00390541
O75312		ZPR1	Zinc finger protein ZPR1 OS=Homo sapiens GN=ZPR1 PE=1 SV=1	20.0436	8	8	8	459	50.893	4.73	108.3	108.4	117.2	83.9	88.2	94	111.3	88.7	1.25479	0.00554739
A0A024R2W7		MAPKAPK3	Mitogen-activated protein kinase-activated protein kinase 3, isoform CRA_a OS=Homo sapiens GN=MAPKAPK3 PE=3 SV=1	15.1832	3	4	3	382	42.96	7.28	107.3	105.8	120.8	81.9	92.9	91.3	111.3	88.7	1.25479	0.0183592
Q00796		SORD	Sorbitol dehydrogenase OS=Homo sapiens GN=SORD PE=1 SV=4	57.7031	16	26	16	357	38.3	7.97	107.2	113.4	113.2	80.6	91.2	94.3	111.267	88.7	1.25442	0.00813164
P61077		UBE2D3	Ubiquitin-conjugating enzyme E2 D3 OS=Homo sapiens GN=UBE2D3 PE=1 SV=1	42.8571	5	19	5	147	16.676	7.8	104.9	113.7	115.2	86.8	84.6	94.8	111.267	88.7333	1.25394	0.0072412
E5RIM7		ATOX1	Copper transport protein ATOX1 OS=Homo sapiens GN=ATOX1 PE=1 SV=1	60.274	4	7	4	73	7.869	7.24	106.7	115.3	111.8	84.6	90.3	91.3	111.267	88.7333	1.25394	0.00228276
P12081		HARS	Histidine--tRNA ligase, cytoplasmic OS=Homo sapiens GN=HARS PE=1 SV=2	41.2574	20	35	15	509	57.374	5.88	107.5	108.7	117.6	81.8	91.1	93.3	111.267	88.7333	1.25394	0.009016
A0A024RDS1		HSPH1	Heat shock 105kDa/110kDa protein 1, isoform CRA_c OS=Homo sapiens GN=HSPH1 PE=3 SV=1	44.1725	31	76	27	858	96.804	5.39	112.1	104.3	117.3	81.2	88.7	96.4	111.233	88.7667	1.2531	0.0178387
Q9H1X3		DNAJC25	DnaJ homolog subfamily C member 25 OS=Homo sapiens GN=DNAJC25 PE=1 SV=1	2.22222	1	2	1	360	42.377	9.13	118.1	103.5	112.1	91	88.9	86.4	111.233	88.7667	1.2531	0.00718365
O14737		PDCD5	Programmed cell death protein 5 OS=Homo sapiens GN=PDCD5 PE=1 SV=3	67.2	9	20	9	125	14.276	6.04	108.2	114.2	111.2	83.8	90.9	91.6	111.2	88.7667	1.25272	0.00178519
P78371		CCT2	T-complex protein 1 subunit beta OS=Homo sapiens GN=CCT2 PE=1 SV=4	82.9907	39	134	39	535	57.452	6.46	111.4	107.3	114.9	80.2	90.1	96.1	111.2	88.8	1.25225	0.0119984
A4D1L5		UBE2H	Ubiquitin-conjugating enzyme E2H (UBC8 homolog, yeast) OS=Homo sapiens GN=UBE2H PE=2 SV=1	26.776	4	8	4	183	20.642	4.67	110.1	111.9	111.6	83.8	91.3	91.3	111.2	88.8	1.25225	0.000941957
A0A090N7T9		SCRN1	Secernin 1 OS=Homo sapiens GN=SCRN1 PE=4 SV=1	15.2174	4	7	4	414	46.353	4.75	99.6	114.6	119.3	79.8	94.3	92.3	111.167	88.8	1.25188	0.0402459
A0A024QZT9		NQO2	NAD(P)H dehydrogenase, quinone 2, isoform CRA_a OS=Homo sapiens GN=NQO2 PE=4 SV=1	29.4372	4	5	4	231	25.936	6.29	110.1	113.7	109.6	82.8	90.8	93	111.133	88.8667	1.25056	0.00268184
Q9Y244		POMP	Proteasome maturation protein OS=Homo sapiens GN=POMP PE=1 SV=1	32.6241	3	3	3	141	15.779	5.11	106.8	109.1	117.4	79.5	89.6	97.5	111.1	88.8667	1.25019	0.0221443
Q8NB16		MLKL	Mixed lineage kinase domain-like protein OS=Homo sapiens GN=MLKL PE=1 SV=1	31.2102	12	14	12	471	54.445	8.82	116.4	104	113	85	87	94.7	111.133	88.9	1.25009	0.00934481
Q13885		TUBB2A	Tubulin beta-2A chain OS=Homo sapiens GN=TUBB2A PE=1 SV=1	73.9326	28	305	1	445	49.875	4.89	99.9	114	119.5	96.1	83.7	86.9	111.133	88.9	1.25009	0.0324934
O75832		PSMD10	26S proteasome non-ATPase regulatory subunit 10 OS=Homo sapiens GN=PSMD10 PE=1 SV=1	53.0973	9	18	9	226	24.412	6.1	109.3	112.4	111.6	84.9	86.7	95.1	111.1	88.9	1.24972	0.0024797
P54652		HSPA2	Heat shock-related 70 kDa protein 2 OS=Homo sapiens GN=HSPA2 PE=1 SV=1	36.9327	24	137	7	639	69.978	5.74	105.4	117.5	110.3	82.3	89.1	95.4	111.067	88.9333	1.24888	0.0127766
B2RAH5			cDNA, FLJ94919, highly similar to Homo sapiens protein phosphatase 1, regulatory (inhibitor) subunit 12A (PPP1R12A), mRNA OS=Homo sapiens PE=2 SV=1	30.3883	26	33	26	1030	115.259	5.43	108.7	112.5	112	84.7	87.1	95	111.067	88.9333	1.24888	0.002666
Q8WUM4		PDCD6IP	Programmed cell death 6-interacting protein OS=Homo sapiens GN=PDCD6IP PE=1 SV=1	47.5806	32	53	32	868	95.963	6.52	110	106.4	116.7	85.4	86.5	94.9	111.033	88.9333	1.2485	0.00654603
D3DWY7		VBP1	Prefoldin subunit 3 OS=Homo sapiens GN=VBP1 PE=3 SV=1	45.9227	12	19	11	233	26.519	9.01	107.9	111.3	113.9	78.7	90.2	98	111.033	88.9667	1.24803	0.0197713
B2RDK3			Oxysterol-binding protein OS=Homo sapiens PE=2 SV=1	3.54167	1	1	1	480	55.136	6.44	103.9	109.8	119.3	85.5	85.4	96	111	88.9667	1.24766	0.0180635
Q01968		OCRL	Inositol polyphosphate 5-phosphatase OCRL-1 OS=Homo sapiens GN=OCRL PE=1 SV=3	9.43396	6	8	6	901	104.138	6.55	105	115	113	90.7	80.9	95.4	111	89	1.24719	0.0138132
F8VW96		CSRP2	Cysteine and glycine-rich protein 2 OS=Homo sapiens GN=CSRP2 PE=1 SV=1	31.6872	6	11	6	243	26.719	8.48	115.5	102.5	115	83.2	88.8	95.1	111	89.0333	1.24672	0.0158987
P07437		TUBB	Tubulin beta chain OS=Homo sapiens GN=TUBB PE=1 SV=2	82.8829	29	400	4	444	49.639	4.89	107.4	108	117.5	76.3	95.6	95.2	110.967	89.0333	1.24635	0.0375186
A0A024QYY3		PRPSAP2	Phosphoribosyl pyrophosphate synthetase-associated protein 2, isoform CRA_a OS=Homo sapiens GN=PRPSAP2 PE=4 SV=1	47.6965	13	22	10	369	40.899	7.44	112.8	108.8	111.1	77.1	90.2	99.9	110.9	89.0667	1.24513	0.0312195
Q9NUQ3		TXLNG	Gamma-taxilin OS=Homo sapiens GN=TXLNG PE=1 SV=2	20.4545	9	12	9	528	60.548	7.52	104.7	115	113.1	88.6	84.9	93.8	110.933	89.1	1.24504	0.00590039
V9HW41		HEL-S-71	Epididymis secretory protein Li 71 OS=Homo sapiens GN=HEL-S-71 PE=2 SV=1	57.2368	8	30	8	152	17.127	6.57	107.4	110.4	114.9	82.1	91.1	94.1	110.9	89.1	1.24467	0.00663199
A0A0S2Z489		PSMD12	Proteasome (Prosome, macropain) 26S subunit, non-ATPase, 12, isoform CRA_a (Fragment) OS=Homo sapiens GN=PSMD12 PE=2 SV=1	43.6404	18	31	18	456	52.871	7.65	112.6	108.4	111.7	84.3	86.1	96.9	110.9	89.1	1.24467	0.00621108
A0A075B6F9		NOSIP	Nitric oxide synthase-interacting protein OS=Homo sapiens GN=NOSIP PE=1 SV=1	46.0526	8	12	8	304	33.41	8.72	113.3	107.9	111.5	90.5	86.2	90.6	110.9	89.1	1.24467	0.000532821
O75083		WDR1	WD repeat-containing protein 1 OS=Homo sapiens GN=WDR1 PE=1 SV=4	61.0561	28	55	1	606	66.152	6.65	108.3	112.5	111.8	87.8	86.9	92.7	110.867	89.1333	1.24383	0.000611863
Q07960		ARHGAP1	Rho GTPase-activating protein 1 OS=Homo sapiens GN=ARHGAP1 PE=1 SV=1	31.4351	11	15	11	439	50.404	6.29	111	106.7	114.9	85.4	87.8	94.2	110.867	89.1333	1.24383	0.00355497
Q5STK2		PFDN6	Prefoldin subunit 6, isoform CRA_b OS=Homo sapiens GN=PFDN6 PE=2 SV=1	55.0388	9	13	9	129	14.574	8.88	102	119.1	111.3	80.3	89.6	97.6	110.8	89.1667	1.24262	0.0370257
P47895		ALDH1A3	Aldehyde dehydrogenase family 1 member A3 OS=Homo sapiens GN=ALDH1A3 PE=1 SV=2	51.5625	24	52	20	512	56.073	7.25	102.3	112.9	117.2	83	87.9	96.7	110.8	89.2	1.24215	0.0224211
B5BU41		CAMK1	Calcium/calmodulin-dependent protein kinase I OS=Homo sapiens GN=CAMK1 PE=2 SV=1	12.973	3	5	3	370	41.253	5.35	106.2	108.4	117.8	85.9	84.1	97.6	110.8	89.2	1.24215	0.0174366
P14324		FDPS	Farnesyl pyrophosphate synthase OS=Homo sapiens GN=FDPS PE=1 SV=4	16.9451	6	13	6	419	48.245	6.15	108.9	107.8	115.7	86.1	87.2	94.3	110.8	89.2	1.24215	0.00374448
A0A140VK56			Transaldolase OS=Homo sapiens PE=2 SV=1	41.8398	16	46	16	337	37.516	6.81	111.9	111.3	109	79	95.2	93.5	110.733	89.2333	1.24094	0.0145854
A0A024QZW0		TPMT	Thiopurine S-methyltransferase, isoform CRA_d OS=Homo sapiens GN=TPMT PE=3 SV=1	13.0612	3	3	3	245	28.162	6.23	110.8	110.1	111.4	82.1	90	95.7	110.767	89.2667	1.24085	0.00558716
A6NDG6		PGP	Glycerol-3-phosphate phosphatase OS=Homo sapiens GN=PGP PE=1 SV=1	35.2025	8	15	8	321	33.985	6.14	106	112.8	113.4	80.3	84.6	102.9	110.733	89.2667	1.24048	0.0427686
O14907		TAX1BP3	Tax1-binding protein 3 OS=Homo sapiens GN=TAX1BP3 PE=1 SV=2	39.5161	3	6	3	124	13.726	8.48	106.3	111.2	114.6	80.7	85.5	101.6	110.7	89.2667	1.2401	0.0338982
Q96KP4		CNDP2	Cytosolic non-specific dipeptidase OS=Homo sapiens GN=CNDP2 PE=1 SV=2	57.0526	20	53	20	475	52.845	5.97	108.3	109.5	114.3	82.7	91.9	93.2	110.7	89.2667	1.2401	0.0047673
A0A087X0R6		SNX12	Sorting nexin-12 OS=Homo sapiens GN=SNX12 PE=1 SV=1	44.7674	8	18	7	172	19.813	7.78	106.5	110.6	115.1	86.9	89	92	110.733	89.3	1.24001	0.00176625
O75663		TIPRL	TIP41-like protein OS=Homo sapiens GN=TIPRL PE=1 SV=2	19.1176	4	5	4	272	31.424	5.91	105.6	113.9	112.6	81.9	87.3	98.7	110.7	89.3	1.23964	0.0185629
A0A0S2Z652		COG7	Component of oligomeric golgi complex 7 isoform 1 (Fragment) OS=Homo sapiens GN=COG7 PE=2 SV=1	8.18182	5	5	5	770	86.289	5.47	119	104.8	108.3	80.3	88.9	98.7	110.7	89.3	1.23964	0.0349028
A0A024R9D8		SPAG1	Sperm associated antigen 1, isoform CRA_b OS=Homo sapiens GN=SPAG1 PE=4 SV=1	4.42765	2	2	2	926	103.544	6.86	111.4	112.7	108	74.4	96.2	97.3	110.7	89.3	1.23964	0.0478032
Q9NT62		ATG3	Ubiquitin-like-conjugating enzyme ATG3 OS=Homo sapiens GN=ATG3 PE=1 SV=1	23.2484	6	8	6	314	35.841	4.74	106	109.9	116.1	78.9	90.1	98.9	110.667	89.3	1.23927	0.0301752
Q60FE5		FLNA	Filamin A OS=Homo sapiens GN=FLNA PE=1 SV=1	65.7634	136	419	127	2620	278.053	6.06	114	104.7	113.3	83.1	86.4	98.5	110.667	89.3333	1.23881	0.0184511
P47813		EIF1AX	Eukaryotic translation initiation factor 1A, X-chromosomal OS=Homo sapiens GN=EIF1AX PE=1 SV=2	47.9167	8	21	8	144	16.45	5.24	107.3	111.3	113.4	93.7	82.6	91.7	110.667	89.3333	1.23881	0.00521606
Q9UJU6		DBNL	Drebrin-like protein OS=Homo sapiens GN=DBNL PE=1 SV=1	36.0465	11	17	11	430	48.178	5.05	106.2	114.3	111.4	85.9	84.2	97.9	110.633	89.3333	1.23843	0.0123532
Q969M1		TOMM40L	Mitochondrial import receptor subunit TOM40B OS=Homo sapiens GN=TOMM40L PE=1 SV=1	5.19481	1	1	1	308	33.895	7.24	117.5	96.2	118.3	86	89.5	92.6	110.667	89.3667	1.23834	0.0465789
F8VVA7		COPZ1	Coatomer subunit zeta-1 OS=Homo sapiens GN=COPZ1 PE=1 SV=1	39.3939	7	20	7	198	22.326	4.89	109.2	109.9	112.8	80.6	89.9	97.6	110.633	89.3667	1.23797	0.0134528
Q15464		SHB	SH2 domain-containing adapter protein B OS=Homo sapiens GN=SHB PE=1 SV=2	11.002	3	3	3	509	55.008	8.9	115.1	112.4	104.4	94.8	82.5	90.8	110.633	89.3667	1.23797	0.0117608
A0A024R1A3		UBE1	Testicular secretory protein Li 63 OS=Homo sapiens GN=UBE1 PE=2 SV=1	57.845	44	158	44	1058	117.774	5.76	109.7	106.3	115.8	80.1	92.6	95.5	110.6	89.4	1.23714	0.0180308
P53621		COPA	Coatomer subunit alpha OS=Homo sapiens GN=COPA PE=1 SV=2	45.5882	49	94	49	1224	138.258	7.66	110.3	105.2	116.3	83.6	89.2	95.4	110.6	89.4	1.23714	0.0105788
P35612		ADD2	Beta-adducin OS=Homo sapiens GN=ADD2 PE=1 SV=3	11.708	6	6	5	726	80.803	5.92	107.5	111.2	113.1	89.2	85.3	93.7	110.6	89.4	1.23714	0.00193957
A8JZZ5			cDNA FLJ78721, highly similar to Homo sapiens CHK2 checkpoint homolog (S. pombe) (CHEK2), transcript variant 1, mRNA OS=Homo sapiens PE=2 SV=1	4.97238	2	3	2	543	60.85	5.91	115.1	107.9	108.7	84.1	89.1	95	110.567	89.4	1.23676	0.00552663
P42224		STAT1	Signal transducer and activator of transcription 1-alpha/beta OS=Homo sapiens GN=STAT1 PE=1 SV=2	48.1333	30	52	30	750	87.28	6.05	109.9	106	115.8	83	88.8	96.5	110.567	89.4333	1.2363	0.0119815
Q6FGH9		DNCL1	DNCL1 protein OS=Homo sapiens GN=DNCL1 PE=2 SV=1	52.809	6	36	4	89	10.359	7.4	108.9	114.1	108.7	102.4	84.4	81.5	110.567	89.4333	1.2363	0.0355016
P19532		TFE3	Transcription factor E3 OS=Homo sapiens GN=TFE3 PE=1 SV=4	1.73913	1	1	1	575	61.484	5.58	113.9	117.8	100	94	86.5	87.8	110.567	89.4333	1.2363	0.0228368
P62258		YWHAE	14-3-3 protein epsilon OS=Homo sapiens GN=YWHAE PE=1 SV=1	76.8627	25	150	22	255	29.155	4.74	106.4	110.8	114.4	82.8	92.2	93.4	110.533	89.4667	1.23547	0.0066365
B3KT21			cDNA FLJ37476 fis, clone BRAWH2012827, highly similar to Homo sapiens BH3 interacting domain death agonist (BID), transcript variant 1, mRNA OS=Homo sapiens PE=2 SV=1	34.0249	5	5	5	241	26.792	7.08	105.9	110.1	115.6	88.9	87.6	91.9	110.533	89.4667	1.23547	0.00240108
A0A024R9Y2		KIAA1267	KIAA1267, isoform CRA_a OS=Homo sapiens GN=KIAA1267 PE=4 SV=1	0.904977	1	1	1	1105	120.892	8.75	108.7	113.1	109.8	89.5	80.5	98.4	110.533	89.4667	1.23547	0.0168224
Q14203		DCTN1	Dynactin subunit 1 OS=Homo sapiens GN=DCTN1 PE=1 SV=3	34.3505	33	45	33	1278	141.607	5.81	109.9	108.1	113.5	86.9	88.1	93.4	110.5	89.4667	1.2351	0.00118019
A6NIH7		UNC119B	Protein unc-119 homolog B OS=Homo sapiens GN=UNC119B PE=1 SV=1	22.7092	4	4	3	251	28.119	5.68	105	111.7	114.9	91.4	80.5	96.6	110.533	89.5	1.23501	0.0194859
P15559		NQO1	NAD(P)H dehydrogenase [quinone] 1 OS=Homo sapiens GN=NQO1 PE=1 SV=1	41.9708	12	40	12	274	30.848	8.88	111.4	105.4	114.6	77.7	95.7	95.2	110.467	89.5333	1.2338	0.0323219
Q8IXQ3		C9orf40	Uncharacterized protein C9orf40 OS=Homo sapiens GN=C9orf40 PE=1 SV=1	20.1031	2	2	2	194	21.05	5.01	107	122.6	101.7	88.1	88.4	92.2	110.433	89.5667	1.23297	0.031219
B4DRL5			cDNA FLJ60834, highly similar to Engulfment and cell motility protein 2 (CED-12 homolog A) OS=Homo sapiens PE=2 SV=1	17.623	8	14	8	732	83.905	5.88	110.5	111.3	109.4	83.5	90	95.2	110.4	89.5667	1.2326	0.00370799
P32321		DCTD	Deoxycytidylate deaminase OS=Homo sapiens GN=DCTD PE=1 SV=2	35.3933	4	6	4	178	20.003	7.56	107.6	112.3	111.3	85.6	90.7	92.5	110.4	89.6	1.23214	0.00116226
Q9HA92		RSAD1	Radical S-adenosyl methionine domain-containing protein 1, mitochondrial OS=Homo sapiens GN=RSAD1 PE=2 SV=2	3.16742	1	1	1	442	48.683	7.78	108.6	114.5	108.1	102.7	82.4	83.7	110.4	89.6	1.23214	0.0389552
O60921		HUS1	Checkpoint protein HUS1 OS=Homo sapiens GN=HUS1 PE=1 SV=1	4.64286	1	1	1	280	31.67	6.84	105.3	117.4	108.5	90.7	78.6	99.5	110.4	89.6	1.23214	0.0420836
Q9HD42		CHMP1A	Charged multivesicular body protein 1a OS=Homo sapiens GN=CHMP1A PE=1 SV=1	24.4898	6	7	6	196	21.689	8.06	101.5	115.1	114.5	89.7	88.9	90.2	110.367	89.6	1.23177	0.00956319
D6R9N9		PACRGL	PACRG-like protein (Fragment) OS=Homo sapiens GN=PACRGL PE=1 SV=1	7.34694	1	1	1	245	27.259	9.55	111.7	112.3	107.1	77.4	95.1	96.3	110.367	89.6	1.23177	0.0304332
Q5JSH3		WDR44	WD repeat-containing protein 44 OS=Homo sapiens GN=WDR44 PE=1 SV=1	6.0241	3	3	3	913	101.304	5.45	101	114.1	115.9	83.5	84.6	100.8	110.333	89.6333	1.23094	0.0471171
Q9NQP4		PFDN4	Prefoldin subunit 4 OS=Homo sapiens GN=PFDN4 PE=1 SV=1	38.806	6	12	6	134	15.305	4.53	110.9	108.2	112	88.6	89.6	90.8	110.367	89.6667	1.23086	8.9754e-05
P49368		CCT3	T-complex protein 1 subunit gamma OS=Homo sapiens GN=CCT3 PE=1 SV=4	64.5872	34	89	34	545	60.495	6.49	111.2	106.4	113.4	79.5	94	95.5	110.333	89.6667	1.23048	0.0198686
Q9H788		SH2D4A	SH2 domain-containing protein 4A OS=Homo sapiens GN=SH2D4A PE=1 SV=1	12.3348	4	4	4	454	52.694	8.06	108.8	105.4	116.8	83.6	88.2	97.2	110.333	89.6667	1.23048	0.0168123
P23528		CFL1	Cofilin-1 OS=Homo sapiens GN=CFL1 PE=1 SV=3	84.3373	18	83	13	166	18.491	8.09	106.3	108.5	116.2	78.9	96.6	93.6	110.333	89.7	1.23003	0.0297248
Q5VIR6		VPS53	Vacuolar protein sorting-associated protein 53 homolog OS=Homo sapiens GN=VPS53 PE=1 SV=1	13.877	6	8	6	699	79.602	6.02	110.6	109.1	111.3	88.6	87.5	93	110.333	89.7	1.23003	0.000331441
Q9UH65		SWAP70	Switch-associated protein 70 OS=Homo sapiens GN=SWAP70 PE=1 SV=1	14.188	5	6	5	585	68.954	5.87	111.4	107.6	111.9	88.3	90.4	90.4	110.3	89.7	1.22965	0.000174937
P63151		PPP2R2A	Serine/threonine-protein phosphatase 2A 55 kDa regulatory subunit B alpha isoform OS=Homo sapiens GN=PPP2R2A PE=1 SV=1	38.0313	11	19	7	447	51.659	6.2	105.8	110.4	114.6	83.7	86.1	99.3	110.267	89.7	1.22928	0.0198378
O75506		HSBP1	Heat shock factor-binding protein 1 OS=Homo sapiens GN=HSBP1 PE=1 SV=1	42.1053	2	3	2	76	8.538	4.36	103.2	116	111.6	99.5	78	91.7	110.267	89.7333	1.22883	0.0485626
B7ZLW0		LPP	LPP protein OS=Homo sapiens GN=LPP PE=2 SV=1	28.7582	8	10	8	612	65.732	7.37	108.2	110.2	112.4	83.4	88.4	97.5	110.267	89.7667	1.22837	0.00886971
M0QXZ5		ZNF428	Zinc finger protein 428 (Fragment) OS=Homo sapiens GN=ZNF428 PE=1 SV=1	7.79817	1	1	1	218	23.553	4.25	105.5	117.9	107.4	93.8	91	84.5	110.267	89.7667	1.22837	0.0123881
P61086		UBE2K	Ubiquitin-conjugating enzyme E2 K OS=Homo sapiens GN=UBE2K PE=1 SV=3	59.5	10	18	10	200	22.393	5.44	104.5	112.7	113.6	86.7	91.2	91.4	110.267	89.7667	1.22837	0.00332827
P61163		ACTR1A	Alpha-centractin OS=Homo sapiens GN=ACTR1A PE=1 SV=1	55.3191	15	36	8	376	42.587	6.64	111.7	109.3	109.7	82.2	91	96.1	110.233	89.7667	1.228	0.00771051
O95433		AHSA1	Activator of 90 kDa heat shock protein ATPase homolog 1 OS=Homo sapiens GN=AHSA1 PE=1 SV=1	48.2249	12	30	12	338	38.25	5.53	109.8	105.1	115.8	83.4	87.1	98.8	110.233	89.7667	1.228	0.0214231
Q15418		RPS6KA1	Ribosomal protein S6 kinase alpha-1 OS=Homo sapiens GN=RPS6KA1 PE=1 SV=2	32.6531	21	30	13	735	82.671	7.83	110.3	109.7	110.7	85.2	90.3	93.8	110.233	89.7667	1.228	0.00123818
P60983		GMFB	Glia maturation factor beta OS=Homo sapiens GN=GMFB PE=1 SV=2	34.507	5	6	5	142	16.702	5.29	102.1	113	115.6	81.6	89.4	98.3	110.233	89.7667	1.228	0.0322505
Q14558		PRPSAP1	Phosphoribosyl pyrophosphate synthase-associated protein 1 OS=Homo sapiens GN=PRPSAP1 PE=1 SV=2	37.6404	10	18	7	356	39.369	7.2	108.4	111.7	110.5	77.9	88.7	102.7	110.2	89.7667	1.22763	0.0477828
Q5TH30		NDRG3	NDRG family member 3, isoform CRA_c OS=Homo sapiens GN=NDRG3 PE=1 SV=1	12.1134	3	7	3	388	42.823	5.33	103.3	112.5	114.8	86.2	87.1	96	110.2	89.7667	1.22763	0.0122132
Q96KB5		PBK	Lymphokine-activated killer T-cell-originated protein kinase OS=Homo sapiens GN=PBK PE=1 SV=3	36.3354	8	13	8	322	36.062	5.12	108.5	104.5	117.7	82.5	87.1	99.8	110.233	89.8	1.22754	0.0344597
P46926		GNPDA1	Glucosamine-6-phosphate isomerase 1 OS=Homo sapiens GN=GNPDA1 PE=1 SV=1	57.0934	11	26	9	289	32.648	6.92	105.7	110.8	114.1	79.2	93.1	97.1	110.2	89.8	1.22717	0.0265596
P35606		COPB2	Coatomer subunit beta' OS=Homo sapiens GN=COPB2 PE=1 SV=2	56.5121	37	73	37	906	102.422	5.27	109.8	103.8	116.9	84	88.6	96.9	110.167	89.8333	1.22635	0.0190495
B1AKK2		DDAH1	Dimethylarginine dimethylaminohydrolase 1, isoform CRA_b OS=Homo sapiens GN=DDAH1 PE=2 SV=1	71.5789	13	19	12	285	31.102	5.81	106.1	111	113.4	81.2	91.4	96.9	110.167	89.8333	1.22635	0.016056
O00764		PDXK	Pyridoxal kinase OS=Homo sapiens GN=PDXK PE=1 SV=1	37.1795	9	19	9	312	35.08	6.13	104	117.3	109.2	89.5	82.7	97.3	110.167	89.8333	1.22635	0.0237512
Q15404		RSU1	Ras suppressor protein 1 OS=Homo sapiens GN=RSU1 PE=1 SV=3	37.1841	9	18	9	277	31.521	8.65	105.1	110.5	114.9	81.7	92	95.8	110.167	89.8333	1.22635	0.0160595
Q9NR45		NANS	Sialic acid synthase OS=Homo sapiens GN=NANS PE=1 SV=2	48.468	15	44	15	359	40.281	6.74	105.9	114.4	110.1	83.9	89.2	96.4	110.133	89.8333	1.22597	0.00973542
Q5T2E6		C10orf76	UPF0668 protein C10orf76 OS=Homo sapiens GN=C10orf76 PE=1 SV=1	3.48331	2	2	2	689	78.659	6.6	116.8	105.9	107.8	82.9	84	102.7	110.167	89.8667	1.22589	0.0488289
O75369		FLNB	Filamin-B OS=Homo sapiens GN=FLNB PE=1 SV=2	57.0331	107	217	98	2602	277.99	5.73	113.3	104.5	112.6	87.7	84.6	97.3	110.133	89.8667	1.22552	0.0130103
Q16881		TXNRD1	Thioredoxin reductase 1, cytoplasmic OS=Homo sapiens GN=TXNRD1 PE=1 SV=3	43.7596	18	31	17	649	70.862	7.39	105.1	108.6	116.7	79.8	90.7	99.1	110.133	89.8667	1.22552	0.0365715
Q9UHV9		PFDN2	Prefoldin subunit 2 OS=Homo sapiens GN=PFDN2 PE=1 SV=1	56.4935	7	17	7	154	16.638	6.58	105.8	111.5	113	84.1	92.3	93.3	110.1	89.9	1.22469	0.0051965
P27708		CAD	CAD protein OS=Homo sapiens GN=CAD PE=1 SV=3	43.7303	67	123	67	2225	242.829	6.46	111.4	104.7	114.1	78.6	90.9	100.2	110.067	89.9	1.22432	0.0422391
Q6PJI9		WDR59	GATOR complex protein WDR59 OS=Homo sapiens GN=WDR59 PE=1 SV=2	5.13347	3	3	3	974	109.724	7.91	104.7	117.4	108.1	94.4	78.6	96.7	110.067	89.9	1.22432	0.0420195
Q15274		QPRT	Nicotinate-nucleotide pyrophosphorylase [carboxylating] OS=Homo sapiens GN=QPRT PE=1 SV=3	38.0471	9	18	9	297	30.826	6.21	107.6	112	110.6	86.7	88.4	94.6	110.067	89.9	1.22432	0.00178823
Q9GZZ1		NAA50	N-alpha-acetyltransferase 50 OS=Homo sapiens GN=NAA50 PE=1 SV=1	44.9704	10	18	10	169	19.386	8.81	112.4	106.9	111	81.7	88.4	99.7	110.1	89.9333	1.22424	0.0215239
Q9Y5X3		SNX5	Sorting nexin-5 OS=Homo sapiens GN=SNX5 PE=1 SV=1	29.2079	10	14	10	404	46.787	6.76	110.2	112.8	107.2	84.5	87.9	97.4	110.067	89.9333	1.22387	0.00858411
P35052		GPC1	Glypican-1 OS=Homo sapiens GN=GPC1 PE=1 SV=2	11.828	5	6	5	558	61.641	7.3	112.1	114.4	103.7	96.7	79.9	93.2	110.067	89.9333	1.22387	0.0293624
O95396		MOCS3	Adenylyltransferase and sulfurtransferase MOCS3 OS=Homo sapiens GN=MOCS3 PE=1 SV=1	6.73913	2	2	2	460	49.638	6.21	114.2	112.7	103.2	91.5	86.4	91.9	110.033	89.9333	1.2235	0.00655849
A0A0S2Z4B3		RBMS1	RNA binding motif single stranded interacting protein 1 isoform 2 (Fragment) OS=Homo sapiens GN=RBMS1 PE=2 SV=1	5.22565	2	2	1	421	46.18	9.07	104.3	110.9	115	87.7	81.9	100.3	110.067	89.9667	1.22342	0.0325934
A4QPB0		IQGAP1	IQ motif containing GTPase activating protein 1 OS=Homo sapiens GN=IQGAP1 PE=1 SV=1	48.1593	62	127	60	1657	189.162	6.48	113	105.2	111.9	86.1	90.6	93.2	110.033	89.9667	1.22305	0.00330189
P05089		ARG1	Arginase-1 OS=Homo sapiens GN=ARG1 PE=1 SV=2	2.17391	1	1	1	322	34.713	7.21	113.6	107	109.5	96.6	83.5	89.8	110.033	89.9667	1.22305	0.00911356
Q53FA7		TP53I3	Quinone oxidoreductase PIG3 OS=Homo sapiens GN=TP53I3 PE=1 SV=2	43.6747	10	14	10	332	35.514	7.17	105.2	111.5	113.4	81.8	96.2	92	110.033	90	1.22259	0.0154263
A0A024RA52		PSMA2	Proteasome subunit alpha type OS=Homo sapiens GN=PSMA2 PE=1 SV=1	67.5214	15	36	15	234	25.882	7.43	114.5	106.9	108.6	87.9	87.8	94.3	110	90	1.22222	0.00315499
A0A0M4G3H8		AGL	Amylo-alpha-1, 6-glucosidase, 4-alpha-glucanotransferaseprovided OS=Homo sapiens GN=AGL PE=4 SV=1	27.3499	32	46	32	1532	174.707	6.8	110.2	107.4	112.4	85	87.4	97.6	110	90	1.22222	0.0083466
Q53HB3			Proteasome 26S ATPase subunit 1 variant (Fragment) OS=Homo sapiens PE=1 SV=1	58.1818	22	42	20	440	49.182	6.21	113.4	103.6	113	83.4	89.4	97.2	110	90	1.22222	0.0174478
A0A109NGN6			Proteasome subunit alpha type OS=Homo sapiens PE=2 SV=1	53.9419	9	34	9	241	26.394	4.79	106	111.2	112.8	81.7	90.7	97.6	110	90	1.22222	0.0165647
P25788		PSMA3	Proteasome subunit alpha type-3 OS=Homo sapiens GN=PSMA3 PE=1 SV=2	39.2157	11	26	11	255	28.415	5.33	109.8	111.7	108.5	84.1	89.7	96.2	110	90	1.22222	0.00522927
B2R5R5			cDNA, FLJ92583, highly similar to Homo sapiens glycogenin (GYG), mRNA OS=Homo sapiens PE=2 SV=1	21.7143	6	14	6	350	39.329	5.53	108.3	110	111.7	80.7	87	102.3	110	90	1.22222	0.0368367
P02792		FTL	Ferritin light chain OS=Homo sapiens GN=FTL PE=1 SV=2	23.4286	3	4	3	175	20.007	5.78	111.9	109.8	108.2	91.9	87.9	90.2	109.967	90	1.22185	0.000224821
Q13257		MAD2L1	Mitotic spindle assembly checkpoint protein MAD2A OS=Homo sapiens GN=MAD2L1 PE=1 SV=1	22.439	5	7	5	205	23.495	5.08	110.7	109	110.3	86.1	88.1	95.9	110	90.0333	1.22177	0.00275788
Q07817		BCL2L1	Bcl-2-like protein 1 OS=Homo sapiens GN=BCL2L1 PE=1 SV=1	8.15451	2	3	2	233	26.033	4.93	108.5	108.8	112.7	102.4	83.9	83.8	110	90.0333	1.22177	0.0343662
B0LPF3		GRB2	Growth factor receptor-bound protein 2 OS=Homo sapiens GN=GRB2 PE=2 SV=1	67.7419	13	23	13	217	25.19	6.32	108.2	107	114.7	89	88.6	92.5	109.967	90.0333	1.2214	0.00177857
P34932		HSPA4	Heat shock 70 kDa protein 4 OS=Homo sapiens GN=HSPA4 PE=1 SV=4	76.1905	54	146	50	840	94.271	5.19	109.5	103.6	116.8	79.9	92.6	97.7	109.967	90.0667	1.22095	0.0380441
P61160		ACTR2	Actin-related protein 2 OS=Homo sapiens GN=ACTR2 PE=1 SV=1	35.533	12	43	12	394	44.732	6.74	109.1	110	110.7	89.4	87.4	93.4	109.933	90.0667	1.22058	0.00040306
A8K3Y8			cDNA FLJ76141 OS=Homo sapiens PE=2 SV=1	29.2929	6	9	6	297	33.731	7.31	109.9	108.3	111.6	78.3	91.4	100.5	109.933	90.0667	1.22058	0.0380208
Q99460		PSMD1	26S proteasome non-ATPase regulatory subunit 1 OS=Homo sapiens GN=PSMD1 PE=1 SV=2	46.3799	32	54	32	953	105.769	5.39	110.6	105	114.2	84.3	87.1	98.9	109.933	90.1	1.22013	0.0190311
P62942		FKBP1A	Peptidyl-prolyl cis-trans isomerase FKBP1A OS=Homo sapiens GN=FKBP1A PE=1 SV=2	41.6667	4	13	4	108	11.943	8.16	110	107.6	112.2	86.4	93.5	90.4	109.933	90.1	1.22013	0.00125969
Q99700		ATXN2	Ataxin-2 OS=Homo sapiens GN=ATXN2 PE=1 SV=2	12.7951	12	12	11	1313	140.196	9.57	109.7	110.1	109.9	91.3	82.6	96.4	109.9	90.1	1.21976	0.00797052
Q6FI81		CIAPIN1	Anamorsin OS=Homo sapiens GN=CIAPIN1 PE=1 SV=2	23.0769	6	8	6	312	33.561	5.62	102.4	111.8	115.4	83.4	86.2	100.7	109.867	90.1	1.21939	0.0404155
O75884		RBBP9	Putative hydrolase RBBP9 OS=Homo sapiens GN=RBBP9 PE=1 SV=2	10.7527	1	2	1	186	20.986	6.2	100	114	115.6	85.7	93.7	90.9	109.867	90.1	1.21939	0.0226327
I3L0A0		TMEM189-UBE2V1	HCG2044781 OS=Homo sapiens GN=TMEM189-UBE2V1 PE=3 SV=1	23.7838	8	26	3	370	42.181	6.71	106.8	109.9	113	78.4	93.3	98.7	109.9	90.1333	1.2193	0.0354105
P52888		THOP1	Thimet oligopeptidase OS=Homo sapiens GN=THOP1 PE=1 SV=2	20.8999	13	17	13	689	78.789	6.05	107.5	108.9	113.2	86.8	89.3	94.3	109.867	90.1333	1.21893	0.00211784
Q92997		DVL3	Segment polarity protein dishevelled homolog DVL-3 OS=Homo sapiens GN=DVL3 PE=1 SV=2	1.67598	1	1	1	716	78.006	6.65	111.4	102.5	115.7	88.3	87.5	94.6	109.867	90.1333	1.21893	0.0117261
B0QZ40		COMMD6	COMM domain-containing protein 6 OS=Homo sapiens GN=COMMD6 PE=1 SV=1	9	1	1	1	100	11.644	9.61	106.2	119.9	103.4	91.3	81.8	97.3	109.833	90.1333	1.21857	0.0443997
Q14204		DYNC1H1	Cytoplasmic dynein 1 heavy chain 1 OS=Homo sapiens GN=DYNC1H1 PE=1 SV=5	40.6156	159	277	159	4646	532.072	6.4	111.3	104.3	113.8	80.7	91.2	98.6	109.8	90.1667	1.21774	0.0294825
P31153		MAT2A	S-adenosylmethionine synthase isoform type-2 OS=Homo sapiens GN=MAT2A PE=1 SV=1	40.2532	12	25	12	395	43.633	6.48	109.5	108.3	111.7	81.9	92.9	95.8	109.833	90.2	1.21766	0.0107042
Q16222		UAP1	UDP-N-acetylhexosamine pyrophosphorylase OS=Homo sapiens GN=UAP1 PE=1 SV=3	23.7548	10	11	10	522	58.732	6.33	111	105.8	112.5	84.6	87.3	98.7	109.767	90.2	1.21693	0.0148702
O00193		SMAP	Small acidic protein OS=Homo sapiens GN=SMAP PE=1 SV=1	33.3333	5	12	5	183	20.32	4.72	109.3	111	109	87.4	91.7	91.5	109.767	90.2	1.21693	0.000217298
P60520		GABARAPL2	Gamma-aminobutyric acid receptor-associated protein-like 2 OS=Homo sapiens GN=GABARAPL2 PE=1 SV=1	40.1709	5	7	5	117	13.658	8.1	104.5	111.7	113.1	86.1	91	93.6	109.767	90.2333	1.21648	0.00481909
Q6IAL9		PTTG1	PTTG1 protein OS=Homo sapiens GN=PTTG1 PE=2 SV=1	7.92079	1	2	1	202	22.01	6.6	109.4	106	113.8	83.2	84.2	103.3	109.733	90.2333	1.21611	0.0478995
B7Z2P6			cDNA FLJ55296, highly similar to Homo sapiens WD repeat domain 42A (WDR42A), mRNA OS=Homo sapiens PE=2 SV=1	2.66312	2	2	2	751	84.726	5.12	113	108	108.3	86	85.5	99.3	109.767	90.2667	1.21603	0.0153196
O00233		PSMD9	26S proteasome non-ATPase regulatory subunit 9 OS=Homo sapiens GN=PSMD9 PE=1 SV=3	38.1166	7	15	7	223	24.667	6.95	108.6	110.4	110.2	92.3	86.4	92.1	109.733	90.2667	1.21566	0.000643849
Q15785		TOMM34	Mitochondrial import receptor subunit TOM34 OS=Homo sapiens GN=TOMM34 PE=1 SV=2	53.3981	13	25	13	309	34.538	8.98	108.8	106.7	113.7	84.1	87.4	99.3	109.733	90.2667	1.21566	0.0183531
Q01469		FABP5	Fatty acid-binding protein, epidermal OS=Homo sapiens GN=FABP5 PE=1 SV=3	69.6296	12	29	12	135	15.155	7.01	101.3	112.3	115.5	82.5	93	95.3	109.7	90.2667	1.21529	0.0290492
Q5U043			S-(hydroxymethyl)glutathione dehydrogenase OS=Homo sapiens PE=2 SV=1	34.7594	12	23	12	374	39.664	7.49	105.6	107.6	115.9	80.7	96.1	94	109.7	90.2667	1.21529	0.0279619
P68366		TUBA4A	Tubulin alpha-4A chain OS=Homo sapiens GN=TUBA4A PE=1 SV=1	56.6964	24	233	5	448	49.892	5.06	109.1	104.1	115.9	81.6	88.8	100.5	109.7	90.3	1.21484	0.0402325
A8K6K7			Glycogen [starch] synthase OS=Homo sapiens PE=2 SV=1	10.3121	6	7	6	737	83.761	6.18	107	117.8	104.3	85.9	87.3	97.8	109.7	90.3333	1.21439	0.0255339
Q9NXR1		NDE1	Nuclear distribution protein nudE homolog 1 OS=Homo sapiens GN=NDE1 PE=1 SV=2	10.4046	3	3	3	346	38.785	5.27	108.6	116.2	104.3	89.9	84.4	96.7	109.7	90.3333	1.21439	0.0176571
A0A140VJG6		CYLN2	Cytoplasmic linker 2, isoform CRA_b OS=Homo sapiens GN=CYLN2 PE=2 SV=1	47.3231	37	57	34	1046	115.708	6.67	108.7	110.9	109.3	86.1	86.8	98	109.633	90.3	1.2141	0.00779694
Q71RC2		LARP4	La-related protein 4 OS=Homo sapiens GN=LARP4 PE=1 SV=3	11.8785	8	12	8	724	80.546	6.61	113.2	101.7	114.1	93.9	86.4	90.7	109.667	90.3333	1.21402	0.0131171
A0A140VK70			Testis secretory sperm-binding protein Li 197a OS=Homo sapiens PE=2 SV=1	59.1224	27	56	27	433	48.603	5.95	108.4	107.8	112.7	83.5	91.2	96.4	109.633	90.3667	1.21321	0.00894229
Q15691		MAPRE1	Microtubule-associated protein RP/EB family member 1 OS=Homo sapiens GN=MAPRE1 PE=1 SV=3	68.2836	17	43	17	268	29.98	5.14	110.6	104	114.3	80.9	89.9	100.3	109.633	90.3667	1.21321	0.0388661
Q53GE7			Tetratricopeptide repeat domain 1 variant (Fragment) OS=Homo sapiens PE=2 SV=1	34.2466	9	14	9	292	33.574	4.88	106.3	107.6	114.9	87.2	85.6	98.4	109.6	90.4	1.21239	0.0165236
Q8IYB7		DIS3L2	DIS3-like exonuclease 2 OS=Homo sapiens GN=DIS3L2 PE=1 SV=4	9.03955	5	5	5	885	99.216	6.1	108.9	105.3	114.5	83	85.7	102.5	109.567	90.4	1.21202	0.0451371
K7ERV3		TK1	Thymidine kinase OS=Homo sapiens GN=TK1 PE=1 SV=1	33.3333	7	11	7	267	28.576	8.56	108.4	105	115.3	81	95.3	94.9	109.567	90.4	1.21202	0.0266148
Q9H4A4		RNPEP	Aminopeptidase B OS=Homo sapiens GN=RNPEP PE=1 SV=2	24.6154	13	19	13	650	72.549	5.74	105.1	109.7	113.9	84.3	89.8	97.2	109.567	90.4333	1.21157	0.0133322
O60493		SNX3	Sorting nexin-3 OS=Homo sapiens GN=SNX3 PE=1 SV=3	53.0864	9	15	8	162	18.751	8.66	106.7	106.9	115.1	85.8	89.7	95.8	109.567	90.4333	1.21157	0.00887468
P42025		ACTR1B	Beta-centractin OS=Homo sapiens GN=ACTR1B PE=1 SV=1	35.3723	9	20	2	376	42.267	6.4	110.5	105	113.2	82.6	92.9	95.8	109.567	90.4333	1.21157	0.0149497
A0A024R6S1		DNAJA2	DnaJ (Hsp40) homolog, subfamily A, member 2, isoform CRA_a OS=Homo sapiens GN=DNAJA2 PE=3 SV=1	44.9029	20	53	20	412	45.717	6.48	111.8	106.2	110.6	89.3	89.8	92.3	109.533	90.4667	1.21076	0.000599532
P41227		NAA10	N-alpha-acetyltransferase 10 OS=Homo sapiens GN=NAA10 PE=1 SV=1	54.4681	10	15	10	235	26.442	5.64	112.2	105.6	110.8	81.3	91.6	98.5	109.533	90.4667	1.21076	0.024008
Q9BYB4		GNB1L	Guanine nucleotide-binding protein subunit beta-like protein 1 OS=Homo sapiens GN=GNB1L PE=1 SV=2	3.0581	1	1	1	327	35.595	7.97	118.6	107.9	102.1	83	89.9	98.5	109.533	90.4667	1.21076	0.0444575
B6ZGU6		NR3C1	Glucocorticoid receptor OS=Homo sapiens GN=NR3C1 PE=2 SV=1	10.6821	5	7	5	777	85.645	6.27	105.4	116.7	106.5	97.7	82.4	91.3	109.533	90.4667	1.21076	0.028883
A0A024RC00		CTPS2	CTP synthase OS=Homo sapiens GN=CTPS2 PE=3 SV=1	22.8669	9	13	6	586	65.636	6.9	106.9	112	109.6	83.8	85.3	102.3	109.5	90.4667	1.21039	0.0357415
E7EQR4		EZR	Ezrin OS=Homo sapiens GN=EZR PE=1 SV=3	59.3857	42	115	28	586	69.329	6.16	105.8	104.9	117.8	88.9	91.9	90.7	109.5	90.5	1.20994	0.0110565
A0A140VK07			Testicular secretory protein Li 7 OS=Homo sapiens PE=2 SV=1	43.8596	21	43	19	684	73.865	6.35	107.2	106.6	114.7	82.3	91.5	97.7	109.5	90.5	1.20994	0.0213922
Q9Y2S0		POLR1D	DNA-directed RNA polymerases I and III subunit RPAC2 OS=Homo sapiens GN=POLR1D PE=1 SV=1	31.5789	3	5	3	133	15.227	5.8	110.5	108.1	109.9	96	84.9	90.6	109.5	90.5	1.20994	0.00443857
A0A024R1C2		TOP3B	DNA topoisomerase OS=Homo sapiens GN=TOP3B PE=3 SV=1	3.13225	2	4	2	862	96.599	8.12	109.5	113.7	105.2	90.3	85	96.3	109.467	90.5333	1.20913	0.00975981
Q9HCN4		GPN1	GPN-loop GTPase 1 OS=Homo sapiens GN=GPN1 PE=1 SV=1	3.47594	1	1	1	374	41.714	4.92	101.7	113.3	113.3	87	84.3	100.3	109.433	90.5333	1.20876	0.0395189
Q5T4S7		UBR4	E3 ubiquitin-protein ligase UBR4 OS=Homo sapiens GN=UBR4 PE=1 SV=1	16.5348	60	87	60	5183	573.476	6.04	108.6	108	111.8	84.8	88.6	98.3	109.467	90.5667	1.20869	0.0107229
Q9H6S3		EPS8L2	Epidermal growth factor receptor kinase substrate 8-like protein 2 OS=Homo sapiens GN=EPS8L2 PE=1 SV=2	25.7343	10	14	10	715	80.57	6.84	104.5	108.1	115.8	83.3	95.7	92.8	109.467	90.6	1.20824	0.0197154
A0A024R2L1		WDR48	Testicular tissue protein Li 224 OS=Homo sapiens GN=WDR48 PE=2 SV=1	14.1802	6	8	6	677	76.162	7.03	106.7	111.7	109.8	87.9	84.1	99.7	109.4	90.5667	1.20795	0.0186195
Q96T58		SPEN	Msx2-interacting protein OS=Homo sapiens GN=SPEN PE=1 SV=1	1.25546	3	3	3	3664	402.004	7.64	107	114.7	106.5	99.7	79.4	92.6	109.4	90.5667	1.20795	0.0444869
V9HWJ1		HEL-S-64p	Glutathione synthetase OS=Homo sapiens GN=HEL-S-64p PE=2 SV=1	48.9451	18	33	18	474	52.352	5.92	104.2	109.8	114.2	82.2	89.9	99.7	109.4	90.6	1.20751	0.0321769
Q9Y570		PPME1	Protein phosphatase methylesterase 1 OS=Homo sapiens GN=PPME1 PE=1 SV=3	49.2228	15	28	15	386	42.288	5.97	105.8	104.9	117.5	80.6	92	99.2	109.4	90.6	1.20751	0.0499074
Q9BV20		MRI1	Methylthioribose-1-phosphate isomerase OS=Homo sapiens GN=MRI1 PE=1 SV=1	21.6802	7	9	7	369	39.125	6.3	105	116.4	106.7	84.6	87.1	100.2	109.367	90.6333	1.20669	0.0354636
A0A024QYY9		SPECC1	Spectrin domain with coiled-coils 1, isoform CRA_a OS=Homo sapiens GN=SPECC1 PE=4 SV=1	14.0449	11	15	10	1068	118.512	6.7	114.6	106	107.5	89.4	86.8	95.7	109.367	90.6333	1.20669	0.00746972
Q59FR8			Galectin (Fragment) OS=Homo sapiens PE=2 SV=1	11.2403	3	5	3	258	27.101	8.41	102.4	113.1	112.6	94.2	85	92.7	109.367	90.6333	1.20669	0.0141413
O75348		ATP6V1G1	V-type proton ATPase subunit G 1 OS=Homo sapiens GN=ATP6V1G1 PE=1 SV=3	43.2203	5	7	5	118	13.749	8.79	105.4	111	111.6	90.9	86.7	94.4	109.333	90.6667	1.20588	0.00329453
J9JIC5		C17orf75	Protein Njmu-R1 OS=Homo sapiens GN=C17orf75 PE=1 SV=1	6.31313	2	2	2	396	44.581	5.03	106.5	111	110.5	80.6	94.9	96.5	109.333	90.6667	1.20588	0.0236981
O00231		PSMD11	26S proteasome non-ATPase regulatory subunit 11 OS=Homo sapiens GN=PSMD11 PE=1 SV=3	58.2938	23	40	23	422	47.434	6.48	114.6	103.2	110.1	81.4	93.3	97.4	109.3	90.7	1.20507	0.0332401
Q6IBS0		TWF2	Twinfilin-2 OS=Homo sapiens GN=TWF2 PE=1 SV=2	48.7106	14	25	8	349	39.523	6.84	114	103.4	110.5	87.9	96.5	87.7	109.3	90.7	1.20507	0.0119914
O14757		CHEK1	Serine/threonine-protein kinase Chk1 OS=Homo sapiens GN=CHEK1 PE=1 SV=2	17.0168	6	8	6	476	54.399	8.25	110.2	106.7	111	85.4	89	97.7	109.3	90.7	1.20507	0.00870645
A0A087WUT6		EIF5B	Eukaryotic translation initiation factor 5B OS=Homo sapiens GN=EIF5B PE=1 SV=1	32.377	33	60	32	1220	138.597	5.58	109.5	105.9	112.5	84.7	92.3	95.2	109.3	90.7333	1.20463	0.00715911
Q93100		PHKB	Phosphorylase b kinase regulatory subunit beta OS=Homo sapiens GN=PHKB PE=1 SV=3	1.64684	2	2	2	1093	124.805	6.95	109.5	109.5	108.8	84.6	91	96.6	109.267	90.7333	1.20426	0.00594889
Q9NRZ7		AGPAT3	1-acyl-sn-glycerol-3-phosphate acyltransferase gamma OS=Homo sapiens GN=AGPAT3 PE=1 SV=1	2.39362	1	1	1	376	43.353	8.72	106.8	113.7	107.3	90.3	89.2	92.7	109.267	90.7333	1.20426	0.00163677
Q9UN37		VPS4A	Vacuolar protein sorting-associated protein 4A OS=Homo sapiens GN=VPS4A PE=1 SV=1	21.0526	7	10	6	437	48.867	7.8	106.5	107.2	114.1	86.3	94.2	91.7	109.267	90.7333	1.20426	0.00529489
Q9NP84		TNFRSF12A	Tumor necrosis factor receptor superfamily member 12A OS=Homo sapiens GN=TNFRSF12A PE=1 SV=1	15.5039	1	1	1	129	13.902	8.95	111.3	112.6	103.9	89	82.5	100.7	109.267	90.7333	1.20426	0.0361498
A8K4T8			Condensin complex subunit 2 OS=Homo sapiens PE=2 SV=1	23.6167	10	12	10	741	82.457	5.06	108.9	107.8	111.1	86.4	90.6	95.3	109.267	90.7667	1.20382	0.00253468
Q9GZP4		PITHD1	PITH domain-containing protein 1 OS=Homo sapiens GN=PITHD1 PE=1 SV=1	30.3318	4	6	4	211	24.163	5.74	106.1	111.7	109.9	86.9	88.7	96.7	109.233	90.7667	1.20345	0.00578072
Q14258		TRIM25	E3 ubiquitin/ISG15 ligase TRIM25 OS=Homo sapiens GN=TRIM25 PE=1 SV=2	55.5556	24	49	24	630	70.928	8.09	111.4	106.5	109.8	86.8	91.7	93.8	109.233	90.7667	1.20345	0.00186298
K7EMQ3		DNM2	Dynamin-2 (Fragment) OS=Homo sapiens GN=DNM2 PE=1 SV=2	53.2872	16	32	1	289	33.66	9.16	111.3	110.4	106	94.9	82.3	95.2	109.233	90.8	1.20301	0.01552
P52788		SMS	Spermine synthase OS=Homo sapiens GN=SMS PE=1 SV=2	50.8197	13	18	13	366	41.242	5.02	104.7	109.4	113.5	79.7	94.7	98	109.2	90.8	1.20264	0.040816
P54105		CLNS1A	Methylosome subunit pICln OS=Homo sapiens GN=CLNS1A PE=1 SV=1	26.5823	3	6	3	237	26.199	4.11	104.9	114.7	108	88.9	91.6	91.9	109.2	90.8	1.20264	0.00378386
P15104		GLUL	Glutamine synthetase OS=Homo sapiens GN=GLUL PE=1 SV=4	29.2225	8	10	8	373	42.037	6.89	104.7	116.6	106.3	83.1	91.6	97.7	109.2	90.8	1.20264	0.0310358
O94985		CLSTN1	Calsyntenin-1 OS=Homo sapiens GN=CLSTN1 PE=1 SV=1	7.95107	7	8	7	981	109.724	4.91	114.1	110.8	102.7	92.4	84.4	95.6	109.2	90.8	1.20264	0.0179383
A0A140VKA9			Testis secretory sperm-binding protein Li 236P OS=Homo sapiens PE=2 SV=1	22.541	4	8	4	244	25.773	7.37	107.2	107.3	113.1	88.6	91.4	92.5	109.2	90.8333	1.2022	0.00126726
Q99785			Putative uncharacterized protein (Fragment) OS=Homo sapiens PE=2 SV=1	8.69565	2	4	2	299	32.353	10.61	113.1	107.8	106.7	93.6	82.7	96.2	109.2	90.8333	1.2022	0.0160297
O43242		PSMD3	26S proteasome non-ATPase regulatory subunit 3 OS=Homo sapiens GN=PSMD3 PE=1 SV=2	40.824	20	39	20	534	60.939	8.44	111.9	106	109.6	84.1	93.1	95.3	109.167	90.8333	1.20183	0.00874952
A0A0S2Z5C9		FTSJ1	Putative tRNA (cytidine(32)/guanosine(34)-2'-O)-methyltransferase OS=Homo sapiens GN=FTSJ1 PE=2 SV=1	13.9466	3	3	3	337	36.911	6.3	106.7	112	108.8	87.4	87.4	97.7	109.167	90.8333	1.20183	0.00820993
Q9BUL8		PDCD10	Programmed cell death protein 10 OS=Homo sapiens GN=PDCD10 PE=1 SV=1	32.0755	6	10	6	212	24.686	8.19	108.2	106.1	113.1	83.4	94.4	94.7	109.133	90.8333	1.20147	0.0126578
Q6IAD8		SLC39A1	SLC39A1 protein OS=Homo sapiens GN=SLC39A1 PE=2 SV=1	10.1852	1	1	1	324	34.144	5.71	102.1	106.2	119.1	89.4	91.6	91.5	109.133	90.8333	1.20147	0.0240495
A8K4N4			cDNA FLJ77844, highly similar to Homo sapiens TNFAIP3 interacting protein 1, mRNA OS=Homo sapiens PE=2 SV=1	1.72956	1	1	1	636	71.775	6.57	106.5	110.4	110.5	83.4	90	99.1	109.133	90.8333	1.20147	0.0181107
P63172		DYNLT1	Dynein light chain Tctex-type 1 OS=Homo sapiens GN=DYNLT1 PE=1 SV=1	33.6283	2	4	2	113	12.444	5.08	116.6	105.9	105	81.9	91.2	99.5	109.167	90.8667	1.20139	0.0439598
Q96TA2		YME1L1	ATP-dependent zinc metalloprotease YME1L1 OS=Homo sapiens GN=YME1L1 PE=1 SV=2	33.2471	20	36	20	773	86.401	8.76	92.8	89.7	90.2	117.2	105.9	104.2	90.9	109.1	0.833181	0.0122302
Q7L5N7		LPCAT2	Lysophosphatidylcholine acyltransferase 2 OS=Homo sapiens GN=LPCAT2 PE=1 SV=1	16.5441	6	10	6	544	60.169	6.55	96.6	91.5	84.6	109.2	104.9	113.2	90.9	109.1	0.833181	0.0125482
Q9UGU0		TCF20	Transcription factor 20 OS=Homo sapiens GN=TCF20 PE=1 SV=3	2.34694	3	4	3	1960	211.641	9.04	90.7	94	88	104.9	105.1	117.3	90.9	109.1	0.833181	0.0150029
P61026		RAB10	Ras-related protein Rab-10 OS=Homo sapiens GN=RAB10 PE=1 SV=1	70	16	47	12	200	22.527	8.38	91.9	92.8	88	106.1	113.1	108.2	90.9	109.133	0.832926	0.00200581
Q8WUK0		PTPMT1	Phosphatidylglycerophosphatase and protein-tyrosine phosphatase 1 OS=Homo sapiens GN=PTPMT1 PE=1 SV=1	28.8557	5	8	5	201	22.829	9.77	92.2	92.9	87.5	121	102.6	103.7	90.8667	109.1	0.832875	0.0422525
Q9BSC4		NOL10	Nucleolar protein 10 OS=Homo sapiens GN=NOL10 PE=1 SV=1	32.7035	16	27	16	688	80.251	8.46	92.8	91.4	88.4	112.7	108	106.7	90.8667	109.133	0.832621	0.00122514
B2R7T5			cDNA, FLJ93595 OS=Homo sapiens PE=2 SV=1	25.5319	3	3	3	188	21.178	6.76	93.1	91.5	87.8	111	108	108.5	90.8	109.167	0.831756	0.000546337
J3KPT4		TRABD	TraB domain-containing protein OS=Homo sapiens GN=TRABD PE=1 SV=1	36.1478	9	12	9	379	42.665	8	88.1	96.1	88.2	112.5	108.8	106.3	90.8	109.2	0.831502	0.00455692
Q96I99		SUCLG2	Succinate--CoA ligase [GDP-forming] subunit beta, mitochondrial OS=Homo sapiens GN=SUCLG2 PE=1 SV=2	58.1019	24	55	24	432	46.481	6.39	89.3	96	87.1	114.6	111.2	101.9	90.8	109.233	0.831248	0.0165542
V9HWI3		HEL-S-130P	Cathepsin D (Lysosomal aspartyl peptidase), isoform CRA_a OS=Homo sapiens GN=HEL-S-130P PE=2 SV=1	47.3301	15	47	15	412	44.524	6.54	89.8	94.8	87.6	101.6	118	108.2	90.7333	109.267	0.830384	0.0237712
P27144		AK4	Adenylate kinase 4, mitochondrial OS=Homo sapiens GN=AK4 PE=1 SV=1	58.296	11	20	11	223	25.252	8.4	89.7	95.5	87	101.7	115.9	110.2	90.7333	109.267	0.830384	0.0184789
B2RAK1			Aminopeptidase OS=Homo sapiens PE=2 SV=1	15.5122	15	18	15	1025	117.27	5.73	90.9	91.4	89.9	109.7	110.5	107.7	90.7333	109.3	0.830131	3.91205e-05
Q5JYT7		KIAA1755	Uncharacterized protein KIAA1755 OS=Homo sapiens GN=KIAA1755 PE=2 SV=2	0.583333	1	2	1	1200	130.765	6.37	90.4	92.8	89	97	117.7	113.2	90.7333	109.3	0.830131	0.0437296
Q5HYM3		DKFZp686C0249	Oxysterol-binding protein OS=Homo sapiens GN=DKFZp686C0249 PE=2 SV=1	27.5281	18	30	18	890	101.234	7.06	92.4	90.2	89.5	103.1	114.7	110	90.7	109.267	0.830079	0.00594486
Q9NQT4		EXOSC5	Exosome complex component RRP46 OS=Homo sapiens GN=EXOSC5 PE=1 SV=1	54.0426	7	14	7	235	25.233	7.59	91.4	92	88.7	105.8	108.5	113.5	90.7	109.267	0.830079	0.00168535
Q9UBS0		RPS6KB2	Ribosomal protein S6 kinase beta-2 OS=Homo sapiens GN=RPS6KB2 PE=1 SV=2	3.73444	2	2	1	482	53.422	7.34	89.5	89.5	93.1	117	97.9	113	90.7	109.3	0.829826	0.0351102
P11387		TOP1	DNA topoisomerase 1 OS=Homo sapiens GN=TOP1 PE=1 SV=2	47.5817	36	88	36	765	90.669	9.31	93.1	89.5	89.5	115.3	109.8	102.9	90.7	109.333	0.829573	0.00789476
P78527		PRKDC	DNA-dependent protein kinase catalytic subunit OS=Homo sapiens GN=PRKDC PE=1 SV=3	40.3828	159	362	159	4128	468.788	7.12	93.9	88.5	89.6	99.2	119.1	109.6	90.6667	109.3	0.829521	0.0356323
B4DK83			Sodium/hydrogen exchanger OS=Homo sapiens PE=2 SV=1	6.20805	2	2	2	596	65.987	5.64	87.2	96.3	88.5	103.6	111.5	113	90.6667	109.367	0.829016	0.0100831
P62330		ARF6	ADP-ribosylation factor 6 OS=Homo sapiens GN=ARF6 PE=1 SV=2	44	5	10	5	175	20.069	8.95	93.2	92.7	86	97.1	115.4	115.5	90.6333	109.333	0.828963	0.0460082
F6TB26		TDRKH	Tudor and KH domain-containing protein OS=Homo sapiens GN=TDRKH PE=1 SV=1	19.5041	7	9	7	605	66.926	5.08	90.4	93.1	88.4	107.9	110.4	109.8	90.6333	109.367	0.828711	0.000273146
A8K5M7			cDNA FLJ76303, highly similar to Homo sapiens armadillo repeat containing, X-linked 2 (ARMCX2), mRNA OS=Homo sapiens PE=2 SV=1	12.5	4	5	4	632	65.693	8.78	86.7	91.5	93.6	99.8	108.2	120.1	90.6	109.367	0.828406	0.0395183
Q02880		TOP2B	DNA topoisomerase 2-beta OS=Homo sapiens GN=TOP2B PE=1 SV=3	35.6089	49	96	6	1626	183.152	8	90.9	91.1	89.8	112.2	106.6	109.4	90.6	109.4	0.828154	0.000351688
A0A024R1Q5		NAGA	N-acetylgalactosaminidase, alpha-, isoform CRA_a OS=Homo sapiens GN=NAGA PE=3 SV=1	13.8686	4	11	4	411	46.534	5.19	84.3	97.9	89.6	101	114.8	112.4	90.6	109.4	0.828154	0.0318395
Q96N66		MBOAT7	Lysophospholipid acyltransferase 7 OS=Homo sapiens GN=MBOAT7 PE=1 SV=2	16.3136	6	12	6	472	52.73	8.97	92.3	93.5	85.9	103.3	117	108	90.5667	109.433	0.827597	0.015497
Q96FQ6		S100A16	Protein S100-A16 OS=Homo sapiens GN=S100A16 PE=1 SV=1	57.2816	6	14	6	103	11.794	6.79	85.3	96.9	89.5	98.6	114.5	115.2	90.5667	109.433	0.827597	0.0419343
A0A024R6H1		SPTLC2	Serine palmitoyltransferase, long chain base subunit 2, isoform CRA_a OS=Homo sapiens GN=SPTLC2 PE=3 SV=1	35.2313	16	24	16	562	62.884	7.78	90.7	92.1	88.9	105.9	113	109.5	90.5667	109.467	0.827345	0.0010977
Q6LES2		ANXA4	Annexin (Fragment) OS=Homo sapiens GN=ANXA4 PE=2 SV=1	78.5047	31	109	30	321	36.062	6.13	86.6	92.5	92.5	113.3	116.4	98.6	90.5333	109.433	0.827292	0.031647
Q53F64			Heterogeneous nuclear ribonucleoprotein AB isoform a variant (Fragment) OS=Homo sapiens PE=2 SV=1	38.8554	18	73	17	332	35.973	7.42	88.7	93.6	89.3	121.5	106.3	100.5	90.5333	109.433	0.827292	0.0427784
Q12981		BNIP1	Vesicle transport protein SEC20 OS=Homo sapiens GN=BNIP1 PE=1 SV=3	38.5965	7	11	7	228	26.116	8.95	92.2	92.7	86.7	110.6	109.9	107.9	90.5333	109.467	0.82704	0.000815955
B3KWH9		ELOVL5	Elongation of very long chain fatty acids protein 5 OS=Homo sapiens GN=ELOVL5 PE=2 SV=1	4.34783	1	2	1	299	35.319	9.41	92.4	88.2	91	97.9	112.3	118.2	90.5333	109.467	0.82704	0.0370551
E9PIE4		MTCH2	Mitochondrial carrier homolog 2 (Fragment) OS=Homo sapiens GN=MTCH2 PE=1 SV=8	49.6183	9	22	1	262	28.531	7.61	99.8	92.3	79.5	106.2	106.3	116	90.5333	109.5	0.826788	0.048508
D6REA1		SIL1	Nucleotide exchange factor SIL1 OS=Homo sapiens GN=SIL1 PE=1 SV=1	18.1624	6	9	6	468	52.715	5.3	88.5	97.1	86	107.2	108	113.3	90.5333	109.5	0.826788	0.00802675
O75367		H2AFY	Core histone macro-H2A.1 OS=Homo sapiens GN=H2AFY PE=1 SV=4	55.3763	21	78	19	372	39.592	9.79	93	92.1	86.4	119.8	109	99.6	90.5	109.467	0.826736	0.0375259
Q9NX58		LYAR	Cell growth-regulating nucleolar protein OS=Homo sapiens GN=LYAR PE=1 SV=2	30.8707	8	18	8	379	43.588	9.54	91.8	92.9	86.8	104.3	114.7	109.5	90.5	109.5	0.826484	0.00582231
A8K0B9			rRNA adenine N(6)-methyltransferase OS=Homo sapiens PE=2 SV=1	25.7225	6	12	6	346	39.513	9.25	89.8	94.4	87.3	115.9	109.1	103.5	90.5	109.5	0.826484	0.0101495
P82650		MRPS22	28S ribosomal protein S22, mitochondrial OS=Homo sapiens GN=MRPS22 PE=1 SV=1	50	18	32	18	360	41.254	7.9	93.6	93	84.8	108.2	111.8	108.6	90.4667	109.533	0.825928	0.00337386
Q96D53		COQ8B	Atypical kinase COQ8B, mitochondrial OS=Homo sapiens GN=COQ8B PE=1 SV=2	22.4265	8	9	8	544	60.031	7.23	84.2	96.3	90.9	104.1	106.4	118.2	90.4667	109.567	0.825677	0.0269586
Q7Z6M4		MTERF4	Transcription termination factor 4, mitochondrial OS=Homo sapiens GN=MTERF4 PE=1 SV=3	9.18635	3	3	3	381	43.93	4.82	89.5	92	89.8	102.6	115.3	110.7	90.4333	109.533	0.825624	0.00731851
B3KTT0			cDNA FLJ38675 fis, clone IMR322000243, highly similar to Nucleoporin Nup43 OS=Homo sapiens PE=2 SV=1	27.1053	7	12	7	380	42.125	5.54	91.8	89.3	90.2	109.9	109.3	109.5	90.4333	109.567	0.825373	1.41736e-05
B3KTM8		MORF4L1	Mortality factor 4-like protein 1 OS=Homo sapiens GN=MORF4L1 PE=1 SV=1	10.6322	3	5	3	348	40.004	9.11	92.6	91.9	86.8	116.7	106.7	105.3	90.4333	109.567	0.825373	0.0089711
A6NHB5		ZMYM3	Zinc finger MYM-type protein 3 OS=Homo sapiens GN=ZMYM3 PE=1 SV=1	10.9329	13	15	12	1372	152.508	6.35	91.5	90.8	88.9	111.2	102	115.4	90.4	109.533	0.82532	0.00900547
A8K905			cDNA FLJ77615, highly similar to Homo sapiens nucleolar complex associated 3 homolog (S. cerevisiae) (NOC3L), mRNA OS=Homo sapiens PE=2 SV=1	22	13	21	13	800	92.491	9.1	93.2	88.6	89.5	113.1	110.8	104.9	90.4333	109.6	0.825122	0.00244307
Q9NXF1		TEX10	Testis-expressed protein 10 OS=Homo sapiens GN=TEX10 PE=1 SV=2	20.3445	12	25	12	929	105.608	9.36	93	90.9	87.3	105.2	115.8	107.7	90.4	109.567	0.825068	0.00602597
Q5T653		MRPL2	39S ribosomal protein L2, mitochondrial OS=Homo sapiens GN=MRPL2 PE=1 SV=2	25.5738	5	10	5	305	33.28	11.3	87.5	91.9	91.8	116.7	104	108	90.4	109.567	0.825068	0.00885166
Q15061		WDR43	WD repeat-containing protein 43 OS=Homo sapiens GN=WDR43 PE=1 SV=3	33.2349	17	30	17	677	74.843	5.57	93.4	88.2	89.6	108.9	111.7	108.2	90.4	109.6	0.824818	0.000524327
A0A024RD36		RPL7L1	Ribosomal protein L7-like 1, isoform CRA_b OS=Homo sapiens GN=RPL7L1 PE=4 SV=1	26.6667	7	11	7	255	29.651	10.52	96.6	86.2	88.4	110.3	113	105.5	90.4	109.6	0.824818	0.00756039
Q15543		TAF13	Transcription initiation factor TFIID subunit 13 OS=Homo sapiens GN=TAF13 PE=1 SV=1	8.87097	1	1	1	124	14.278	4.81	85.7	100.2	85.3	105	113.5	110.4	90.4	109.633	0.824567	0.0248876
M0QXF9		BCAT2	Branched-chain-amino-acid aminotransferase (Fragment) OS=Homo sapiens GN=BCAT2 PE=1 SV=1	34.1573	11	17	11	445	49.935	7.46	87.9	97.4	85.7	113.9	100.8	114.2	90.3333	109.633	0.823959	0.0275161
D7UNW5		GALNT6	Polypeptide N-acetylgalactosaminyltransferase OS=Homo sapiens GN=GALNT6 PE=2 SV=1	2.73312	1	1	1	622	71.123	8.18	86.3	95.1	89.6	114.7	101.5	112.9	90.3333	109.7	0.823458	0.0163895
Q9UKR5		C14orf1	Probable ergosterol biosynthetic protein 28 OS=Homo sapiens GN=C14orf1 PE=1 SV=1	30	4	10	4	140	15.854	9.83	93.7	94.8	82.4	118.5	109.8	100.8	90.3	109.7	0.823154	0.0399357
Q16795		NDUFA9	NADH dehydrogenase [ubiquinone] 1 alpha subcomplex subunit 9, mitochondrial OS=Homo sapiens GN=NDUFA9 PE=1 SV=2	41.6446	14	25	14	377	42.483	9.8	93	90.4	87.5	112.8	110.3	106.1	90.3	109.733	0.822904	0.00151918
B3KN09			cDNA FLJ13173 fis, clone NT2RP3003831, highly similar to Endonuclease G-like 1 (EC 3.1.30.-) OS=Homo sapiens PE=2 SV=1	17.9348	5	7	5	368	41.057	8.46	88.7	95.2	87	109.7	109.5	110	90.3	109.733	0.822904	0.00148308
A0A087WXF8		ZCCHC17	Nucleolar protein of 40 kDa OS=Homo sapiens GN=ZCCHC17 PE=1 SV=1	9.88593	2	2	2	263	29.556	9.64	88.6	94.4	87.9	98.7	117.9	112.6	90.3	109.733	0.822904	0.033088
Q9Y6A1		POMT1	Protein O-mannosyl-transferase 1 OS=Homo sapiens GN=POMT1 PE=1 SV=3	1.87416	1	1	1	747	84.826	8.4	93.4	89.1	88.3	102.1	109.1	118.1	90.2667	109.767	0.82235	0.0163412
Q9HCC0		MCCC2	Methylcrotonoyl-CoA carboxylase beta chain, mitochondrial OS=Homo sapiens GN=MCCC2 PE=1 SV=1	58.7922	26	68	26	563	61.294	7.68	89.9	92.2	88.6	114.6	109.1	105.6	90.2333	109.767	0.822047	0.00228912
Q15427		SF3B4	Splicing factor 3B subunit 4 OS=Homo sapiens GN=SF3B4 PE=1 SV=1	19.1038	4	7	4	424	44.357	8.56	92.7	92.1	85.9	109.2	114	106.1	90.2333	109.767	0.822047	0.00349283
Q96CU9		FOXRED1	FAD-dependent oxidoreductase domain-containing protein 1 OS=Homo sapiens GN=FOXRED1 PE=1 SV=2	31.893	13	20	13	486	53.778	7.78	89	91.2	90.4	113.9	108.9	106.6	90.2	109.8	0.821494	0.000954277
Q9BW92		TARS2	Threonine--tRNA ligase, mitochondrial OS=Homo sapiens GN=TARS2 PE=1 SV=1	28.6908	15	18	15	718	80.985	7.3	89.1	95.4	86.1	111.6	106.8	111	90.2	109.8	0.821494	0.00331351
A0A024R7C5		MRPL4	Mitochondrial ribosomal protein L4, isoform CRA_a OS=Homo sapiens GN=MRPL4 PE=3 SV=1	45.0161	8	14	8	311	34.897	9.72	87.9	95.9	86.8	119.4	106.4	103.7	90.2	109.833	0.821244	0.025203
Q9UNK0		STX8	Syntaxin-8 OS=Homo sapiens GN=STX8 PE=1 SV=2	33.8983	7	9	7	236	26.89	4.98	85	97.7	87.8	115.1	100.1	114.3	90.1667	109.833	0.820941	0.0339772
Q13838		DDX39B	Spliceosome RNA helicase DDX39B OS=Homo sapiens GN=DDX39B PE=1 SV=1	60.7477	23	74	11	428	48.96	5.67	84.8	94.7	91	101.4	117.8	110.4	90.1667	109.867	0.820692	0.0238366
P09661		SNRPA1	U2 small nuclear ribonucleoprotein A' OS=Homo sapiens GN=SNRPA1 PE=1 SV=2	44.3137	10	20	10	255	28.398	8.62	90.8	92.4	87.1	103.4	111.1	115.2	90.1	109.9	0.819836	0.00645863
O75911		DHRS3	Short-chain dehydrogenase/reductase 3 OS=Homo sapiens GN=DHRS3 PE=1 SV=2	38.7417	8	13	8	302	33.527	8.84	87.6	96.6	86.1	101.7	121.4	106.6	90.1	109.9	0.819836	0.0430155
Q9BRT2		UQCC2	Ubiquinol-cytochrome-c reductase complex assembly factor 2 OS=Homo sapiens GN=UQCC2 PE=1 SV=1	55.5556	6	9	6	126	14.865	7.37	91	92.7	86.6	119.9	107.9	101.9	90.1	109.9	0.819836	0.0240369
Q8NDX6		ZNF740	Zinc finger protein 740 OS=Homo sapiens GN=ZNF740 PE=1 SV=1	18.1347	2	2	2	193	21.843	9.19	101.1	86.7	82.5	106.7	115	108.1	90.1	109.933	0.819588	0.0327532
Q15031		LARS2	Probable leucine--tRNA ligase, mitochondrial OS=Homo sapiens GN=LARS2 PE=1 SV=2	20.7087	13	15	13	903	101.911	8.22	90.3	93.2	86.8	104.2	111.4	114.2	90.1	109.933	0.819588	0.00481403
P61225		RAP2B	Ras-related protein Rap-2b OS=Homo sapiens GN=RAP2B PE=1 SV=1	54.6448	8	11	4	183	20.491	4.81	92.1	94.8	83.4	113.8	111.5	104.5	90.1	109.933	0.819588	0.0110401
A0A140T8X7		PPT2	Lysosomal thioesterase PPT2 OS=Homo sapiens GN=PPT2 PE=1 SV=1	5.84416	1	2	1	308	34.938	6.33	92.6	89.3	88.3	99	121	109.7	90.0667	109.9	0.819533	0.0376873
B4E3B0			cDNA FLJ59821, highly similar to Homo sapiens N-acyl-phosphatidylethanolamine-hydrolyzing phospholipase D (NAPE-PLD), mRNA OS=Homo sapiens PE=2 SV=1	3.64807	1	1	1	466	53.559	8.05	86.2	99	85	105	107.8	117	90.0667	109.933	0.819284	0.0261153
A0A024R370		TMF1	TATA element modulatory factor 1, isoform CRA_a OS=Homo sapiens GN=TMF1 PE=4 SV=1	10.43	8	8	8	1093	122.767	4.92	89.7	89.8	90.6	105.4	113.8	110.6	90.0333	109.933	0.818981	0.0012773
Q5U091		NRAS	Neuroblastoma RAS viral (V-ras) oncogene homolog OS=Homo sapiens GN=NRAS PE=2 SV=1	66.6667	9	21	2	189	21.216	5.17	87.7	93.2	89.2	111.9	114	104	90.0333	109.967	0.818733	0.00449734
Q8WXV6		PLEC1	Plectin isoform 1a (Fragment) OS=Homo sapiens GN=PLEC1 PE=2 SV=1	35.1351	1	2	1	37	4.143	9.99	93.6	90.7	85.8	122.1	103.8	104	90.0333	109.967	0.818733	0.0370689
Q9H2D1		SLC25A32	Mitochondrial folate transporter/carrier OS=Homo sapiens GN=SLC25A32 PE=1 SV=2	16.1905	4	5	4	315	35.385	9.45	84	96.2	89.9	119.2	106.2	104.5	90.0333	109.967	0.818733	0.0267694
Q9Y6N1		COX11	Cytochrome c oxidase assembly protein COX11, mitochondrial OS=Homo sapiens GN=COX11 PE=1 SV=3	12.3188	2	4	2	276	31.41	9.06	88.4	95.1	86.6	111.5	109	109.5	90.0333	110	0.818485	0.00177454
Q9NPJ3		ACOT13	Acyl-coenzyme A thioesterase 13 OS=Homo sapiens GN=ACOT13 PE=1 SV=1	37.8571	4	9	4	140	14.951	9.14	86.3	98.8	84.9	115.6	110.5	103.8	90	109.967	0.81843	0.023277
Q99496		RNF2	E3 ubiquitin-protein ligase RING2 OS=Homo sapiens GN=RNF2 PE=1 SV=1	12.2024	3	5	2	336	37.632	6.84	85	93.6	91.4	102	115.3	112.6	90	109.967	0.81843	0.0142392
Q8TCS8		PNPT1	Polyribonucleotide nucleotidyltransferase 1, mitochondrial OS=Homo sapiens GN=PNPT1 PE=1 SV=2	52.8736	31	58	31	783	85.897	7.77	90.4	92.9	86.7	114.6	110.9	104.5	90	110	0.818182	0.00443248
P38117		ETFB	Electron transfer flavoprotein subunit beta OS=Homo sapiens GN=ETFB PE=1 SV=3	64.3137	18	47	18	255	27.826	8.1	90.2	94.3	85.5	121.7	108	100.3	90	110	0.818182	0.0415182
P10114		RAP2A	Ras-related protein Rap-2a OS=Homo sapiens GN=RAP2A PE=1 SV=1	40.9836	6	8	1	183	20.602	4.82	88	88.5	93.5	118.1	110.9	101	90	110	0.818182	0.0190501
Q96EH3		MALSU1	Mitochondrial assembly of ribosomal large subunit protein 1 OS=Homo sapiens GN=MALSU1 PE=1 SV=1	24.7863	4	7	4	234	26.153	5.49	87.2	98.4	84.4	109.3	112.8	108	90	110.033	0.817934	0.0113239
Q9NZE8		MRPL35	39S ribosomal protein L35, mitochondrial OS=Homo sapiens GN=MRPL35 PE=1 SV=3	9.04255	2	3	2	188	21.501	11.3	87.7	94.4	87.9	108.6	110.7	110.8	90	110.033	0.817934	0.000980419
Q9NQT5		EXOSC3	Exosome complex component RRP40 OS=Homo sapiens GN=EXOSC3 PE=1 SV=3	53.0909	7	14	7	275	29.553	8.1	93.1	87.9	88.9	100.9	117.5	111.7	89.9667	110.033	0.817631	0.0172378
A0A0A0MRK6		MTX1	Metaxin 1, isoform CRA_b OS=Homo sapiens GN=MTX1 PE=1 SV=1	14.1631	6	9	6	466	51.431	9.79	88.7	93.1	88	123.8	105	101.4	89.9333	110.067	0.817081	0.0475684
P11279		LAMP1	Lysosome-associated membrane glycoprotein 1 OS=Homo sapiens GN=LAMP1 PE=1 SV=3	18.4652	6	23	6	417	44.854	8.75	86.5	98.8	84.4	108.3	114.4	107.4	89.9	110.033	0.817025	0.0157817
Q92552		MRPS27	28S ribosomal protein S27, mitochondrial OS=Homo sapiens GN=MRPS27 PE=1 SV=3	44.2029	15	22	15	414	47.581	6.18	89.3	91.6	88.9	110.6	107.8	111.9	89.9333	110.1	0.816833	0.000165074
A8K588			cDNA FLJ76823, highly similar to Homo sapiens splicing factor, arginine/serine-rich 6 (SFRS6), mRNA OS=Homo sapiens PE=2 SV=1	33.4302	14	42	8	344	39.464	11.4	91.6	91.2	87	114	111.5	104.8	89.9333	110.1	0.816833	0.00293576
B7ZM99		MTHFD1L	MTHFD1L protein OS=Homo sapiens GN=MTHFD1L PE=1 SV=1	30.6435	24	51	24	979	105.823	8.06	90.2	91.1	88.4	113.5	109.3	107.4	89.9	110.067	0.816778	0.000512468
Q96BW9		TAMM41	Phosphatidate cytidylyltransferase, mitochondrial OS=Homo sapiens GN=TAMM41 PE=1 SV=2	20.354	6	12	6	452	51.034	7.94	86.8	95.6	87.4	114.1	111.2	105.1	89.9333	110.133	0.816586	0.00651768
A8K7U3			cDNA FLJ77788 OS=Homo sapiens PE=2 SV=1	3.6855	1	1	1	407	46.973	8.91	95.5	83.3	90.9	111.5	117	101.8	89.9	110.1	0.81653	0.0238208
A0A0A0MT83		IVD	Isovaleryl-CoA dehydrogenase, mitochondrial OS=Homo sapiens GN=IVD PE=1 SV=1	35.6808	13	18	13	426	46.621	8.05	90.1	94.8	84.8	115.6	109.4	105.3	89.9	110.1	0.81653	0.00830557
Q9NSE4		IARS2	Isoleucine--tRNA ligase, mitochondrial OS=Homo sapiens GN=IARS2 PE=1 SV=2	41.0079	33	67	33	1012	113.719	7.2	90	91.8	87.8	113.8	113.4	103.2	89.8667	110.133	0.815981	0.00518081
B3KMV8			cDNA FLJ12766 fis, clone NT2RP2001520, highly similar to Calcium-binding mitochondrial carrier protein Aralar1 OS=Homo sapiens PE=2 SV=1	34.8083	17	34	12	678	74.731	8.38	88	93.7	87.9	111.1	114.7	104.6	89.8667	110.133	0.815981	0.004526
P42126		ECI1	Enoyl-CoA delta isomerase 1, mitochondrial OS=Homo sapiens GN=ECI1 PE=1 SV=1	28.1457	7	20	7	302	32.795	8.54	88.6	95.6	85.4	112.5	116.3	101.6	89.8667	110.133	0.815981	0.0191415
Q9UNQ2		DIMT1	Probable dimethyladenosine transferase OS=Homo sapiens GN=DIMT1 PE=1 SV=1	43.77	12	19	12	313	35.214	9.99	95.4	87.3	86.9	106	111.8	112.6	89.8667	110.133	0.815981	0.00425291
Q03701		CEBPZ	CCAAT/enhancer-binding protein zeta OS=Homo sapiens GN=CEBPZ PE=1 SV=3	21.6319	17	26	17	1054	120.898	5.94	93.6	87.3	88.6	114	109.1	107.4	89.8333	110.167	0.815431	0.00180199
Q8NEJ9		NGDN	Neuroguidin OS=Homo sapiens GN=NGDN PE=1 SV=1	26.9841	7	8	7	315	35.872	9.57	90.7	91.5	87.3	111.7	105.7	113.1	89.8333	110.167	0.815431	0.00146295
A0A1A7UP97		GALNS	Galactosamine (N-acetyl)-6-sulfatase OS=Homo sapiens GN=GALNS PE=4 SV=1	11.3027	4	5	4	522	57.931	6.83	81.3	99.4	88.7	102	110.5	117.9	89.8	110.133	0.815375	0.0435227
Q8TB37		NUBPL	Iron-sulfur protein NUBPL OS=Homo sapiens GN=NUBPL PE=1 SV=3	22.884	5	7	5	319	34.061	9.04	88.3	96.5	84.5	110.7	107.9	112.2	89.7667	110.267	0.814087	0.00549032
P04083		ANXA1	Annexin A1 OS=Homo sapiens GN=ANXA1 PE=1 SV=2	76.5896	28	84	28	346	38.69	7.02	85.3	88.3	95.7	115.8	111.4	103.7	89.7667	110.3	0.813841	0.0119464
A5YM53		ITGAV	ITGAV protein OS=Homo sapiens GN=ITGAV PE=2 SV=1	41.4122	37	65	37	1048	116.032	5.74	91.3	91.6	86.3	116.1	111.2	103.5	89.7333	110.267	0.813785	0.00713041
B7Z6S9			Glucosylceramidase OS=Homo sapiens PE=2 SV=1	21.095	10	21	10	621	68.717	7.94	88.7	94.8	85.7	104.6	116.7	109.5	89.7333	110.267	0.813785	0.00967569
Q9BQP7		MGME1	Mitochondrial genome maintenance exonuclease 1 OS=Homo sapiens GN=MGME1 PE=1 SV=1	40.6977	11	18	11	344	39.396	7.68	85.9	96.3	86.9	107.6	112.1	111.2	89.7	110.3	0.813237	0.00455359
Q9BYD2		MRPL9	39S ribosomal protein L9, mitochondrial OS=Homo sapiens GN=MRPL9 PE=1 SV=2	37.4532	9	15	9	267	30.224	10.08	85.7	95.9	87.5	113.9	107.3	109.8	89.7	110.333	0.812991	0.00499574
Q3KQZ1		SLC25A35	Solute carrier family 25 member 35 OS=Homo sapiens GN=SLC25A35 PE=2 SV=1	12.3333	3	3	3	300	32.417	9.11	84.9	98.4	85.7	113.1	108.3	109.5	89.6667	110.3	0.812934	0.0109801
A0A024RA75		HIBADH	3-hydroxyisobutyrate dehydrogenase OS=Homo sapiens GN=HIBADH PE=3 SV=1	38.9881	9	17	9	336	35.306	8.13	89.5	94.8	84.7	121.6	107.9	101.5	89.6667	110.333	0.812689	0.0352572
Q03135		CAV1	Caveolin-1 OS=Homo sapiens GN=CAV1 PE=1 SV=4	56.1798	9	23	9	178	20.458	6.02	88.8	94.7	85.5	110.3	112.1	108.6	89.6667	110.333	0.812689	0.00198259
J3KNA0		OXA1L	Mitochondrial inner membrane protein OXA1L OS=Homo sapiens GN=OXA1L PE=1 SV=1	18.5859	9	16	9	495	55.234	9.69	89.6	91.2	88.2	114.3	110.6	106.1	89.6667	110.333	0.812689	0.0012124
A0A024RAH8		DDX18	RNA helicase OS=Homo sapiens GN=DDX18 PE=3 SV=1	54.9254	28	66	28	670	75.359	9.5	92.6	86.8	89.5	111.2	113.8	106.2	89.6333	110.4	0.811896	0.00173881
Q59GX2			Solute carrier family 2 (Facilitated glucose transporter), member 1 variant (Fragment) OS=Homo sapiens PE=2 SV=1	11.9923	6	8	6	517	56.981	9.47	97.3	86.8	84.8	112.7	107.6	110.9	89.6333	110.4	0.811896	0.00749627
B3KTA5			cDNA FLJ37943 fis, clone CTONG2008621, highly similar to Syntaxin-17 OS=Homo sapiens PE=2 SV=1	2.98013	1	1	1	302	33.353	6.57	80.6	92.2	96.1	105.9	105.7	119.6	89.6333	110.4	0.811896	0.0337566
A0A024R473		MRPL44	Mitochondrial ribosomal protein L44, isoform CRA_a OS=Homo sapiens GN=MRPL44 PE=4 SV=1	42.1687	11	22	11	332	37.512	8.4	90.8	92.6	85.4	116.3	108.8	106.1	89.6	110.4	0.811594	0.00511993
Q9H5Q4		TFB2M	Dimethyladenosine transferase 2, mitochondrial OS=Homo sapiens GN=TFB2M PE=1 SV=1	31.0606	13	22	13	396	45.32	9.19	91.5	88.7	88.6	107.4	114.6	109.2	89.6	110.4	0.811594	0.000918787
Q9H583		HEATR1	HEAT repeat-containing protein 1 OS=Homo sapiens GN=HEATR1 PE=1 SV=3	20.569	34	56	2	2144	242.215	6.54	87.2	89.1	92.4	108.2	112.5	110.6	89.5667	110.433	0.811047	0.000443916
Q7Z6K3		PTAR1	Protein prenyltransferase alpha subunit repeat-containing protein 1 OS=Homo sapiens GN=PTAR1 PE=1 SV=2	4.72637	1	1	1	402	46.376	6.99	97.8	82.3	88.6	99.8	117.9	113.6	89.5667	110.433	0.811047	0.0420045
P56937		HSD17B7	3-keto-steroid reductase OS=Homo sapiens GN=HSD17B7 PE=1 SV=1	20.8211	5	7	5	341	38.182	8.1	84.5	95.4	88.8	111	113.9	106.4	89.5667	110.433	0.811047	0.0056126
Q07666		KHDRBS1	KH domain-containing, RNA-binding, signal transduction-associated protein 1 OS=Homo sapiens GN=KHDRBS1 PE=1 SV=1	34.3115	16	36	13	443	48.197	8.66	91.8	89.7	87.2	111.5	114.4	105.5	89.5667	110.467	0.810803	0.00206524
E5KSX8			Mitochondrial transcription factor A OS=Homo sapiens PE=4 SV=1	32.1138	8	15	8	246	29.092	9.72	89.4	92.9	86.3	119.3	111.7	100.4	89.5333	110.467	0.810501	0.022726
Q9NVH6		TMLHE	Trimethyllysine dioxygenase, mitochondrial OS=Homo sapiens GN=TMLHE PE=1 SV=1	20.4276	6	8	6	421	49.486	7.72	86.4	94.5	87.6	118	112.2	101.2	89.5	110.467	0.810199	0.0193069
B5MDU6		LDAH	Lipid droplet-associated hydrolase OS=Homo sapiens GN=LDAH PE=1 SV=1	9.72973	3	4	3	370	42.641	6.93	84.1	94.4	90	121.3	106.6	103.5	89.5	110.467	0.810199	0.0284248
O75475		PSIP1	PC4 and SFRS1-interacting protein OS=Homo sapiens GN=PSIP1 PE=1 SV=1	53.3962	23	59	21	530	60.067	9.13	89.5	90.8	88.2	114.9	112.1	104.5	89.5	110.5	0.809955	0.00277732
Q9NX12			cDNA FLJ20496 fis, clone KAT08729 OS=Homo sapiens PE=2 SV=1	25.188	3	3	3	266	30.292	5.21	94.8	87.7	86	109.6	109.9	112	89.5	110.5	0.809955	0.00168816
E7EX18		MPV17	Protein Mpv17 OS=Homo sapiens GN=MPV17 PE=1 SV=1	4.18848	1	2	1	191	21.383	9.23	79	95.8	93.7	114.4	106.8	110.3	89.5	110.5	0.809955	0.021403
A0A024RDK4		INTS12	Integrator complex subunit 12, isoform CRA_a OS=Homo sapiens GN=INTS12 PE=4 SV=1	10.6061	2	3	2	462	48.777	9.69	88.5	93.6	86.3	108.1	110	113.4	89.4667	110.5	0.809653	0.0013847
O75691		UTP20	Small subunit processome component 20 homolog OS=Homo sapiens GN=UTP20 PE=1 SV=3	13.4291	29	37	29	2785	318.182	7.39	92	87.7	88.7	105.8	117.5	108.3	89.4667	110.533	0.809409	0.00511426
D4QEZ8		ACADS	Short-chain acyl-CoA dehydrogenase OS=Homo sapiens GN=ACADS PE=2 SV=1	41.5049	13	27	13	412	44.327	7.72	87.6	96.8	84	120	109.8	101.8	89.4667	110.533	0.809409	0.0316573
P01893		HLA-H	Putative HLA class I histocompatibility antigen, alpha chain H OS=Homo sapiens GN=HLA-H PE=5 SV=3	34.2541	8	11	1	362	40.866	6.3	90.4	93.2	84.7	114.5	108.9	108.3	89.4333	110.567	0.808863	0.00268099
P62314		SNRPD1	Small nuclear ribonucleoprotein Sm D1 OS=Homo sapiens GN=SNRPD1 PE=1 SV=1	54.6218	4	11	4	119	13.273	11.56	93	92.1	83.1	109.9	112.6	109.2	89.4	110.567	0.808562	0.00312665
B4DJ38			cDNA FLJ56092, highly similar to Pentatricopeptide repeat protein 1 OS=Homo sapiens PE=2 SV=1	18.1575	10	15	8	749	84.058	8.57	89.8	92	86.4	108.2	102.1	121.6	89.4	110.633	0.808075	0.0238475
Q9NPI1		BRD7	Bromodomain-containing protein 7 OS=Homo sapiens GN=BRD7 PE=1 SV=1	15.6682	6	7	6	651	74.092	6.39	87.3	92.5	88.3	103.8	111.4	116.6	89.3667	110.6	0.808017	0.00629278
E7EPT4		NDUFV2	NADH dehydrogenase [ubiquinone] flavoprotein 2, mitochondrial OS=Homo sapiens GN=NDUFV2 PE=1 SV=1	39.2857	9	17	9	252	27.889	8	89.4	93.8	84.9	104.5	114.6	112.7	89.3667	110.6	0.808017	0.00619219
B9EG64		CLK4	CDC-like kinase 4 OS=Homo sapiens GN=CLK4 PE=2 SV=1	6.86071	2	2	2	481	57.421	8.68	87.6	93.1	87.4	114.3	108.2	109.4	89.3667	110.633	0.807773	0.00128924
P12532		CKMT1A	Creatine kinase U-type, mitochondrial OS=Homo sapiens GN=CKMT1A PE=1 SV=1	44.1247	12	23	12	417	47.007	8.34	91.2	92.6	84.3	111	112.4	108.6	89.3667	110.667	0.80753	0.00159185
Q9BZE1		MRPL37	39S ribosomal protein L37, mitochondrial OS=Homo sapiens GN=MRPL37 PE=1 SV=2	51.5366	18	28	18	423	48.087	8.59	89.2	94.5	84.3	112.3	113.8	105.9	89.3333	110.667	0.807229	0.00501069
Q53GS9		USP39	U4/U6.U5 tri-snRNP-associated protein 2 OS=Homo sapiens GN=USP39 PE=1 SV=2	31.3274	14	24	14	565	65.34	8.91	92.3	87.6	88	101.1	118.5	112.5	89.3	110.7	0.806685	0.0158317
O95363		FARS2	Phenylalanine--tRNA ligase, mitochondrial OS=Homo sapiens GN=FARS2 PE=1 SV=1	11.9734	4	6	4	451	52.324	7.46	87	97.5	83.4	111.5	107.3	113.3	89.3	110.7	0.806685	0.00955875
A6XND5			Ribonuclease T2 OS=Homo sapiens PE=2 SV=1	8.14332	2	2	2	307	35.575	8.07	85.9	89.1	92.9	98.4	114.8	119	89.3	110.733	0.806442	0.0314852
Q08426		EHHADH	Peroxisomal bifunctional enzyme OS=Homo sapiens GN=EHHADH PE=1 SV=3	13.9696	7	8	7	723	79.445	9.14	83.2	99.8	84.8	108.6	104.3	119.2	89.2667	110.7	0.806384	0.0359381
A0A1B0GUZ7		EFR3A	Protein EFR3 homolog A OS=Homo sapiens GN=EFR3A PE=1 SV=1	4.00943	3	3	3	848	96.069	6.57	90.9	90.4	86.5	107.4	114.9	109.8	89.2667	110.7	0.806384	0.00120253
A0A0S2Z410		HSD17B10	Hydroxysteroid dehydrogenase 10 isoform 1 (Fragment) OS=Homo sapiens GN=HSD17B10 PE=2 SV=1	79.3103	17	77	17	261	26.906	7.78	86.9	97.2	83.7	118.5	111.1	102.6	89.2667	110.733	0.806141	0.0249708
D3U719		CTC1	Conserved telomere capping protein 1 OS=Homo sapiens GN=CTC1 PE=2 SV=1	1.47905	1	1	1	1217	134.555	7.88	87.3	87.2	93.3	116.4	98.9	116.9	89.2667	110.733	0.806141	0.0264576
D3DU01		TMEM49	Transmembrane protein 49, isoform CRA_b OS=Homo sapiens GN=TMEM49 PE=4 SV=1	8.83055	2	3	2	419	47.523	6.65	89	89.9	88.8	103.6	116.1	112.5	89.2333	110.733	0.80584	0.0044968
X6RAL5		SAP18	Histone deacetylase complex subunit SAP18 OS=Homo sapiens GN=SAP18 PE=1 SV=1	62.2093	10	15	10	172	19.514	9.8	90.6	92.1	85	114.2	107.1	111.1	89.2333	110.8	0.805355	0.00193873
Q8WUW2		AGPAT2	1-acyl-sn-glycerol-3-phosphate acyltransferase OS=Homo sapiens GN=AGPAT2 PE=2 SV=1	6.81004	2	2	2	279	31.007	9.01	93.5	93.6	80.5	102.4	112.8	117.2	89.2	110.8	0.805054	0.0249896
Q6ZXV5		TMTC3	Transmembrane and TPR repeat-containing protein 3 OS=Homo sapiens GN=TMTC3 PE=1 SV=2	10.929	8	11	7	915	103.942	8.87	87.7	92	87.9	103.9	116.3	112.3	89.2	110.833	0.804812	0.00523113
A0A024R292		FVT1	Follicular lymphoma variant translocation 1, isoform CRA_a OS=Homo sapiens GN=FVT1 PE=3 SV=1	15.3614	4	4	4	332	36.164	7.12	89.3	90	88.2	108.3	115	109.2	89.1667	110.833	0.804511	0.000559174
Q9HCG8		CWC22	Pre-mRNA-splicing factor CWC22 homolog OS=Homo sapiens GN=CWC22 PE=1 SV=3	0.991189	1	1	1	908	105.402	7.03	84.8	93.7	89	99.4	112.8	120.3	89.1667	110.833	0.804511	0.0308682
Q9NWR8		MCUB	Calcium uniporter regulatory subunit MCUb, mitochondrial OS=Homo sapiens GN=MCUB PE=1 SV=2	9.82143	3	5	3	336	39.057	9.16	87.4	94.6	85.4	115	111	106.6	89.1333	110.867	0.803969	0.00419574
Q01081		U2AF1	Splicing factor U2AF 35 kDa subunit OS=Homo sapiens GN=U2AF1 PE=1 SV=3	55.8333	11	38	11	240	27.854	8.81	88.3	94.1	85	112.6	114.6	105.5	89.1333	110.9	0.803727	0.00474912
I6L975		HSDL1	Hydroxysteroid dehydrogenase like 1 OS=Homo sapiens GN=HSDL1 PE=2 SV=1	39.3939	10	18	10	330	36.948	8.72	91.9	92	83.4	115.6	113	104.1	89.1	110.9	0.803427	0.00837064
Q9P086		MED11	Mediator of RNA polymerase II transcription subunit 11 OS=Homo sapiens GN=MED11 PE=1 SV=2	16.2393	1	1	1	117	13.121	5.96	103.2	82.7	81.3	105.8	113.6	113.4	89.0667	110.933	0.802885	0.0439343
Q9BRU9		UTP23	rRNA-processing protein UTP23 homolog OS=Homo sapiens GN=UTP23 PE=1 SV=2	11.6466	2	2	2	249	28.384	10.07	90.8	88.3	88.1	104.2	112.4	116.2	89.0667	110.933	0.802885	0.00388803
O75787		ATP6AP2	Renin receptor OS=Homo sapiens GN=ATP6AP2 PE=1 SV=2	28.5714	9	13	1	350	38.983	6.1	92.4	91.4	83.3	115.3	107.9	109.7	89.0333	110.967	0.802343	0.00383075
Q7KZN9		COX15	Cytochrome c oxidase assembly protein COX15 homolog OS=Homo sapiens GN=COX15 PE=1 SV=1	12.1951	4	5	4	410	46	9.82	85.5	96.6	85	107	117	109	89.0333	111	0.802102	0.0106967
P13473		LAMP2	Lysosome-associated membrane glycoprotein 2 OS=Homo sapiens GN=LAMP2 PE=1 SV=2	5.85366	3	7	3	410	44.932	5.63	87.5	91.7	87.8	111.8	111.1	110	89	110.967	0.802043	0.000110878
Q96DA6		DNAJC19	Mitochondrial import inner membrane translocase subunit TIM14 OS=Homo sapiens GN=DNAJC19 PE=1 SV=3	57.7586	7	9	7	116	12.491	10.1	89.2	94.3	83.5	117	113	103	89	111	0.801802	0.0133814
P30084		ECHS1	Enoyl-CoA hydratase, mitochondrial OS=Homo sapiens GN=ECHS1 PE=1 SV=4	71.3793	20	82	20	290	31.367	8.07	88.1	93.7	85.2	121.5	109.7	101.9	89	111.033	0.801561	0.0239558
O75071		EFCAB14	EF-hand calcium-binding domain-containing protein 14 OS=Homo sapiens GN=EFCAB14 PE=1 SV=1	2.62626	1	1	1	495	54.997	6.32	89.6	89.3	88.1	95.5	116.4	121.2	89	111.033	0.801561	0.0494072
B2RAF3			cDNA, FLJ94877, highly similar to Homo sapiens placental protein 6 (PL6), mRNA OS=Homo sapiens PE=2 SV=1	6.83761	2	3	2	351	38.201	8.16	89.8	90.7	86.4	103.1	108.1	121.9	88.9667	111.033	0.801261	0.0187319
Q9ULD0		OGDHL	2-oxoglutarate dehydrogenase-like, mitochondrial OS=Homo sapiens GN=OGDHL PE=1 SV=3	21.6832	18	23	10	1010	114.409	6.65	86.6	96.6	83.6	112.8	110.2	110.2	88.9333	111.067	0.80072	0.00532874
Q8TA92			Similar to AFG3 ATPase family gene 3-like 2 (Yeast) (Fragment) OS=Homo sapiens PE=2 SV=1	37.931	30	46	30	812	90.138	9.11	88	91.6	87.2	115.7	112.5	105.1	88.9333	111.1	0.80048	0.00291522
Q8N0U4		FAM185A	Protein FAM185A OS=Homo sapiens GN=FAM185A PE=2 SV=3	3.31633	1	1	1	392	42.275	7.97	82	101	83.7	114.5	106.6	112.1	88.9	111.067	0.80042	0.0270823
A8K5B0			cDNA FLJ75682, highly similar to Homo sapiens armadillo repeat containing, X-linked 3 (ARMCX3), transcript variant 1, mRNA OS=Homo sapiens PE=2 SV=1	35.0923	11	21	11	379	42.546	8.18	86.9	91.8	88	96.3	120.9	116.1	88.9	111.1	0.80018	0.0444264
Q9UK39		NOCT	Nocturnin OS=Homo sapiens GN=NOCT PE=2 SV=2	7.88863	2	2	2	431	48.165	7.23	89.9	90.7	86.1	116.1	105.2	112	88.9	111.1	0.80018	0.00310082
Q9NRG7		SDR39U1	Epimerase family protein SDR39U1 OS=Homo sapiens GN=SDR39U1 PE=1 SV=2	5.64263	2	2	2	319	34.726	9.77	84.3	93.1	89.3	119	103.2	111.2	88.9	111.133	0.79994	0.0131015
Q96FL9		GALNT14	Polypeptide N-acetylgalactosaminyltransferase 14 OS=Homo sapiens GN=GALNT14 PE=1 SV=1	10.3261	4	4	4	552	64.28	7.72	84	95	87.6	100.6	119.1	113.7	88.8667	111.133	0.79964	0.0250702
P51636		CAV2	Caveolin-2 OS=Homo sapiens GN=CAV2 PE=1 SV=2	17.284	2	4	2	162	18.279	5.27	81.6	101.4	83.6	108.2	105	120.3	88.8667	111.167	0.7994	0.0464924
A0A087WVA1		SELENOT	Selenoprotein T OS=Homo sapiens GN=SELENOT PE=1 SV=1	17.9487	3	4	3	195	22.329	8.78	93.3	91	82.2	110.7	113	109.8	88.8333	111.167	0.7991	0.00314128
A0A059RVX4		COX1	Cytochrome c oxidase subunit 1 OS=Homo sapiens GN=COX1 PE=3 SV=1	6.04288	1	1	1	513	56.858	6.84	101.6	83.6	81.3	120.1	109.6	103.8	88.8333	111.167	0.7991	0.0491649
O75446		SAP30	Histone deacetylase complex subunit SAP30 OS=Homo sapiens GN=SAP30 PE=1 SV=1	10.4545	2	2	2	220	23.292	9.17	87.3	93.3	85.9	100.1	113.1	120.4	88.8333	111.2	0.798861	0.0244683
Q9NQ29		LUC7L	Putative RNA-binding protein Luc7-like 1 OS=Homo sapiens GN=LUC7L PE=1 SV=1	23.9892	8	14	4	371	43.701	9.92	92.8	86.9	86.7	108.6	113.3	111.6	88.8	111.167	0.798801	0.000770535
Q16880		UGT8	2-hydroxyacylsphingosine 1-beta-galactosyltransferase OS=Homo sapiens GN=UGT8 PE=2 SV=2	7.57856	4	5	4	541	61.398	9.52	91.1	86.8	88.5	105.7	118.1	109.7	88.8	111.167	0.798801	0.00441796
Q9BWH2		FUNDC2	FUN14 domain-containing protein 2 OS=Homo sapiens GN=FUNDC2 PE=1 SV=2	17.9894	3	4	3	189	20.663	9.73	96.4	84.8	85.2	117.9	108.3	107.4	88.8	111.2	0.798561	0.011557
S4R3H4		ACIN1	Apoptotic chromatin condensation inducer in the nucleus OS=Homo sapiens GN=ACIN1 PE=1 SV=1	25.643	25	51	2	1283	145.355	6	91.4	87.5	87.4	123.6	106.3	103.8	88.7667	111.233	0.798022	0.0242135
Q96C01		FAM136A	Protein FAM136A OS=Homo sapiens GN=FAM136A PE=1 SV=1	73.1884	12	23	12	138	15.631	7.61	88.4	95.6	82.3	124.4	107.3	102	88.7667	111.233	0.798022	0.0445859
P23284		PPIB	Peptidyl-prolyl cis-trans isomerase B OS=Homo sapiens GN=PPIB PE=1 SV=2	51.3889	14	68	14	216	23.728	9.41	88.2	92.5	85.6	114.3	115.4	104	88.7667	111.233	0.798022	0.0056445
Q9NRX2		MRPL17	39S ribosomal protein L17, mitochondrial OS=Homo sapiens GN=MRPL17 PE=1 SV=1	50.2857	10	13	10	175	20.038	10.11	89.3	94.4	82.6	122.2	107.3	104.2	88.7667	111.233	0.798022	0.0261853
P38159		RBMX	RNA-binding motif protein, X chromosome OS=Homo sapiens GN=RBMX PE=1 SV=3	49.6164	23	84	7	391	42.306	10.05	92.4	86.8	87	125.7	109.3	98.8	88.7333	111.267	0.797484	0.0486697
B3KM21		FAM36A	Family with sequence similarity 36, member A, isoform CRA_a OS=Homo sapiens GN=FAM36A PE=2 SV=1	11.8644	1	2	1	118	13.283	8.76	85.3	94.9	86	118.3	111.8	103.8	88.7333	111.3	0.797245	0.0123259
Q5C9Z4		NOM1	Nucleolar MIF4G domain-containing protein 1 OS=Homo sapiens GN=NOM1 PE=1 SV=1	21.9767	13	16	13	860	96.198	8.1	92	86.3	87.8	109.9	110.8	113.2	88.7	111.3	0.796945	0.000329383
Q9BQ95		ECSIT	Evolutionarily conserved signaling intermediate in Toll pathway, mitochondrial OS=Homo sapiens GN=ECSIT PE=1 SV=1	31.0905	10	15	10	431	49.117	6.29	89.7	92.5	83.9	110.4	116	107.6	88.7	111.333	0.796707	0.00306302
B2R761			cDNA, FLJ93299, highly similar to Homo sapiens sterol carrier protein 2 (SCP2), mRNA OS=Homo sapiens PE=2 SV=1	58.5009	29	60	29	547	58.984	7.05	88	94.3	83.7	121	111.8	101.2	88.6667	111.333	0.796407	0.025139
Q6P4Q7		CNNM4	Metal transporter CNNM4 OS=Homo sapiens GN=CNNM4 PE=1 SV=3	6.83871	4	6	4	775	86.552	6.07	90.7	88.5	86.8	105.3	120.8	107.9	88.6667	111.333	0.796407	0.0100034
Q02252		ALDH6A1	Methylmalonate-semialdehyde dehydrogenase [acylating], mitochondrial OS=Homo sapiens GN=ALDH6A1 PE=1 SV=2	40.5607	17	26	17	535	57.803	8.5	86.3	95.7	83.9	117.5	113.5	103.1	88.6333	111.367	0.79587	0.0153729
B2RAU6			cDNA, FLJ95129, highly similar to Homo sapiens phosphatidylinositol glycan, class Q (PIGQ), transcript variant 2, mRNA OS=Homo sapiens PE=2 SV=1	3.09811	1	1	1	581	65.272	9.04	80	98.8	87.1	106	104.8	123.3	88.6333	111.367	0.79587	0.048646
G8JLH6		CD9	Tetraspanin (Fragment) OS=Homo sapiens GN=CD9 PE=1 SV=1	23.6842	5	21	5	228	25.391	6.52	91.9	90.5	83.4	113	120.1	101.1	88.6	111.4	0.795332	0.0205467
A0A024R6W0		GOT2	Aspartate aminotransferase OS=Homo sapiens GN=GOT2 PE=4 SV=1	72.093	30	153	5	430	47.445	9.01	88.2	91.2	86.4	112.2	114.1	107.9	88.6	111.4	0.795332	0.000588433
Q9P2N6		KANSL3	KAT8 regulatory NSL complex subunit 3 OS=Homo sapiens GN=KANSL3 PE=1 SV=2	2.21239	1	2	1	904	95.932	9.39	86.4	91.8	87.6	99.6	123.4	111.2	88.6	111.4	0.795332	0.0320408
Q8IYQ7		THNSL1	Threonine synthase-like 1 OS=Homo sapiens GN=THNSL1 PE=1 SV=2	16.2853	9	13	9	743	83.017	7.12	88	92.3	85.4	111.7	113.7	108.8	88.5667	111.4	0.795033	0.000754094
A0A024RD83		TTC19	Tetratricopeptide repeat domain 19, isoform CRA_a OS=Homo sapiens GN=TTC19 PE=4 SV=1	14.4737	5	6	5	380	42.43	5.77	84.9	98.5	82.3	109.9	113.2	111.2	88.5667	111.433	0.794795	0.0110623
E9PI68		SPCS2	Signal peptidase complex subunit 2 OS=Homo sapiens GN=SPCS2 PE=1 SV=1	35.7977	11	16	11	257	28.485	8.79	93.9	88.5	83.3	113.6	114	106.8	88.5667	111.467	0.794557	0.00400804
P05141		SLC25A5	ADP/ATP translocase 2 OS=Homo sapiens GN=SLC25A5 PE=1 SV=7	53.6913	20	111	7	298	32.831	9.69	86.9	94.1	84.6	121.7	108.3	104.4	88.5333	111.467	0.794258	0.0184325
Q8WY22		BRI3BP	BRI3-binding protein OS=Homo sapiens GN=BRI3BP PE=1 SV=1	17.1315	3	4	3	251	27.818	9.44	85.3	94.7	85.6	105.5	118.4	110.5	88.5333	111.467	0.794258	0.00917703
D6W5E5		OTX1	Orthodenticle homolog 1 (Drosophila), isoform CRA_a OS=Homo sapiens GN=OTX1 PE=4 SV=1	3.2345	1	1	1	371	39.151	9.16	86.3	88.7	90.5	114.5	105.4	114.6	88.5	111.5	0.793722	0.00218734
O75390		CS	Citrate synthase, mitochondrial OS=Homo sapiens GN=CS PE=1 SV=2	34.3348	13	54	8	466	51.68	8.32	88.3	91.8	85.3	120.8	110.1	103.6	88.4667	111.5	0.793423	0.0126292
A0A024R9E4		MAL2	Mal, T-cell differentiation protein 2, isoform CRA_a OS=Homo sapiens GN=MAL2 PE=4 SV=1	6.25	1	2	1	176	19.113	6.24	88.5	97.8	79	113.6	112.4	108.7	88.4333	111.567	0.79265	0.0146918
A0A0S2Z433		NDUFS4	NADH dehydrogenase (Ubiquinone) Fe-S protein 4, 18kDa (NADH-coenzyme Q reductase) (Fragment) OS=Homo sapiens GN=NDUFS4 PE=2 SV=1	19.4286	3	4	3	175	20.095	10.3	85.2	95.4	84.7	112	118.5	104.3	88.4333	111.6	0.792413	0.0126246
A0A087WYL7		MED6	Mediator of RNA polymerase II transcription subunit 6 OS=Homo sapiens GN=MED6 PE=1 SV=1	3.50195	1	1	1	257	29.663	8.69	99.8	83.8	81.7	99.9	115.6	119.3	88.4333	111.6	0.792413	0.0483795
A0A0S2Z4J1		HSD17B4	Hydroxysteroid (17-beta) dehydrogenase 4, isoform CRA_b (Fragment) OS=Homo sapiens GN=HSD17B4 PE=2 SV=1	60.3261	36	118	36	736	79.636	8.84	88.3	90.6	86.4	114.1	111.9	108.8	88.4333	111.6	0.792413	0.000292706
Q4G176		ACSF3	Acyl-CoA synthetase family member 3, mitochondrial OS=Homo sapiens GN=ACSF3 PE=1 SV=3	16.4931	6	7	6	576	64.089	8.37	87.7	92.3	85.2	106.2	117.9	110.7	88.4	111.6	0.792115	0.00436135
A0A0S2Z6V5		EFHA1	EF-hand domain family member A1 isoform 1 (Fragment) OS=Homo sapiens GN=EFHA1 PE=2 SV=1	28.341	7	13	7	434	49.634	9.09	88.1	91.4	85.6	110	113.8	111.1	88.3667	111.633	0.79158	0.000326774
Q9NU23		LYRM2	LYR motif-containing protein 2 OS=Homo sapiens GN=LYRM2 PE=1 SV=1	12.5	1	2	1	88	10.443	10.46	80	96.2	88.9	115	103.9	116.1	88.3667	111.667	0.791343	0.018711
Q9NS18		GLRX2	Glutaredoxin-2, mitochondrial OS=Homo sapiens GN=GLRX2 PE=1 SV=1	11.5854	1	1	1	164	18.04	9.11	90.8	83.5	90.8	100.7	115.4	118.9	88.3667	111.667	0.791343	0.0186175
P57721		PCBP3	Poly(rC)-binding protein 3 OS=Homo sapiens GN=PCBP3 PE=2 SV=2	19.6765	6	36	1	371	39.44	8.07	82.7	87.2	95.1	104.2	113.2	117.5	88.3333	111.633	0.791281	0.0120118
O14832		PHYH	Phytanoyl-CoA dioxygenase, peroxisomal OS=Homo sapiens GN=PHYH PE=1 SV=1	7.69231	3	3	3	338	38.514	8.47	82.7	95.9	86.4	122.7	102.5	109.7	88.3333	111.633	0.791281	0.0304357
Q99829		CPNE1	Copine-1 OS=Homo sapiens GN=CPNE1 PE=1 SV=1	31.4711	13	24	13	537	59.022	5.83	84	89.3	91.7	117.2	114	103.8	88.3333	111.667	0.791045	0.00732149
Q13405		MRPL49	39S ribosomal protein L49, mitochondrial OS=Homo sapiens GN=MRPL49 PE=1 SV=1	39.759	6	12	6	166	19.186	9.45	88.8	90.3	85.8	126.7	110.1	98.2	88.3	111.667	0.790746	0.0492199
A0A024QZF1		hCG_19665	HCG19665, isoform CRA_a OS=Homo sapiens GN=hCG_19665 PE=4 SV=1	25.2874	11	24	11	522	53.222	5.31	92	88.4	84.5	105.1	123.2	106.8	88.3	111.7	0.79051	0.0191644
B4DL54		CHURC1-FNTB	CHURC1-FNTB readthrough OS=Homo sapiens GN=CHURC1-FNTB PE=2 SV=1	1.91083	1	2	1	471	52.751	5.88	85.1	93.5	86.2	116.4	106.8	111.9	88.2667	111.7	0.790212	0.00359977
P82932		MRPS6	28S ribosomal protein S6, mitochondrial OS=Homo sapiens GN=MRPS6 PE=1 SV=3	47.2	7	11	7	125	14.218	9.26	87	94.2	83.6	113.5	113.3	108.4	88.2667	111.733	0.789976	0.00269206
B3KM97			cDNA FLJ10554 fis, clone NT2RP2002385, highly similar to Synaptic glycoprotein SC2 OS=Homo sapiens PE=2 SV=1	32.4675	13	22	13	308	36.03	9.5	89.9	89.8	85	109.3	118.3	107.6	88.2333	111.733	0.789678	0.00312548
P49916		LIG3	DNA ligase 3 OS=Homo sapiens GN=LIG3 PE=1 SV=2	23.1913	16	20	16	1009	112.835	9.01	87	91.8	85.8	113.1	109.2	113.1	88.2	111.8	0.788909	0.000464815
A8K761		NDUFB10	NADH dehydrogenase (Ubiquinone) 1 beta subcomplex, 10, 22kDa, isoform CRA_b OS=Homo sapiens GN=NDUFB10 PE=2 SV=1	51.7442	9	14	9	172	20.763	8.48	88.5	91.8	84.3	116.5	111	107.9	88.2	111.8	0.788909	0.00207316
Q9BUB7		TMEM70	Transmembrane protein 70, mitochondrial OS=Homo sapiens GN=TMEM70 PE=1 SV=2	21.5385	5	8	5	260	28.951	8.91	90.4	90.9	83.3	119.9	112.8	102.7	88.2	111.8	0.788909	0.0132243
Q9UMS0		NFU1	NFU1 iron-sulfur cluster scaffold homolog, mitochondrial OS=Homo sapiens GN=NFU1 PE=1 SV=2	30.315	7	14	7	254	28.444	5.07	86.1	94	84.4	118.9	113.2	103.4	88.1667	111.833	0.788376	0.0119023
Q9HC52		CBX8	Chromobox protein homolog 8 OS=Homo sapiens GN=CBX8 PE=1 SV=3	5.9126	2	2	2	389	43.369	9.91	93.3	87.7	83.5	110.3	118.8	106.4	88.1667	111.833	0.788376	0.00693913
P16298		PPP3CB	Serine/threonine-protein phosphatase 2B catalytic subunit beta isoform OS=Homo sapiens GN=PPP3CB PE=1 SV=2	8.58779	4	5	1	524	58.987	5.91	85.6	88.3	90.6	98.1	111.7	125.7	88.1667	111.833	0.788376	0.043129
A8K5V5			cDNA FLJ78652, highly similar to Homo sapiens PHD finger protein 12 (PHF12), transcript variant 1, mRNA OS=Homo sapiens PE=2 SV=1	2.19124	1	1	1	1004	109.657	7.74	88.1	90.8	85.6	111.8	113.5	110.2	88.1667	111.833	0.788376	0.000184254
O75521		ECI2	Enoyl-CoA delta isomerase 2, mitochondrial OS=Homo sapiens GN=ECI2 PE=1 SV=4	42.8934	12	25	12	394	43.557	9	85.7	91.3	87.4	114.2	114.3	107.2	88.1333	111.9	0.787608	0.00116992
Q02127		DHODH	Dihydroorotate dehydrogenase (quinone), mitochondrial OS=Homo sapiens GN=DHODH PE=1 SV=3	26.3291	7	8	7	395	42.841	9.67	88.5	89.7	86.1	112.7	113.7	109.3	88.1	111.9	0.78731	0.000151354
Q7Z4Y4		AK3	GTP:AMP phosphotransferase AK3, mitochondrial OS=Homo sapiens GN=AK3 PE=2 SV=1	66.5198	15	33	15	227	25.605	9.31	89.4	91.8	83.1	115.5	117.2	103.1	88.1	111.933	0.787076	0.00979444
A0A024RDB8		HPSE	Heparanase, isoform CRA_a OS=Homo sapiens GN=HPSE PE=4 SV=1	1.65746	1	1	1	543	61.138	9.29	87.6	92.1	84.6	114.2	103.7	117.9	88.1	111.933	0.787076	0.00755857
A0A024QZ78		AGMAT	Agmatine ureohydrolase (Agmatinase), isoform CRA_a OS=Homo sapiens GN=AGMAT PE=3 SV=1	13.3523	3	5	3	352	37.636	7.59	82.1	98.8	83.3	112.4	110.6	112.8	88.0667	111.933	0.786778	0.0116616
O00411		POLRMT	DNA-directed RNA polymerase, mitochondrial OS=Homo sapiens GN=POLRMT PE=1 SV=2	19.4309	16	17	4	1230	138.532	8.98	87.1	92.2	84.8	102.7	112	121.2	88.0333	111.967	0.786246	0.0142914
H3BLT4		BIRC5	Baculoviral IAP repeat-containing protein 5 OS=Homo sapiens GN=BIRC5 PE=1 SV=1	40	4	8	4	165	18.625	6.21	91.5	86.4	86.2	118.9	101.9	115.1	88.0333	111.967	0.786246	0.0116632
Q9Y375		NDUFAF1	Complex I intermediate-associated protein 30, mitochondrial OS=Homo sapiens GN=NDUFAF1 PE=1 SV=2	16.8196	4	5	4	327	37.74	7.64	90.7	90.8	82.6	105.1	110.2	120.6	88.0333	111.967	0.786246	0.0107538
B4DGM9		TOR1A	Torsin family 1, member A (Torsin A), isoform CRA_a OS=Homo sapiens GN=TOR1A PE=2 SV=1	20.6044	6	8	6	364	40.759	7.99	86.5	90.6	86.9	100.6	118.4	117	88	112	0.785714	0.0149195
Q92797		SYMPK	Symplekin OS=Homo sapiens GN=SYMPK PE=1 SV=2	22.9984	20	36	20	1274	141.059	6.13	87.1	90.3	86.6	105.3	118.1	112.7	88	112.033	0.785481	0.00347634
A6NDA2			cDNA, FLJ95224, Homo sapiens proline rich 3 (PRR3), mRNA OS=Homo sapiens PE=2 SV=2	5.92885	1	1	1	253	27.809	9.82	81	100.7	82.2	106.9	107.3	121.8	87.9667	112	0.785417	0.0404026
Q8TCT8		SPPL2A	Signal peptide peptidase-like 2A OS=Homo sapiens GN=SPPL2A PE=1 SV=2	4.03846	2	2	2	520	58.104	8.32	87.5	89.7	86.7	113.4	118.5	104.1	87.9667	112	0.785417	0.00506895
A0A024RBE8		SLC25A3	Solute carrier family 25 (Mitochondrial carrier phosphate carrier), member 3, isoform CRA_a OS=Homo sapiens GN=SLC25A3 PE=2 SV=1	51.8006	21	109	21	361	39.933	9.36	88.4	90.8	84.7	123.8	109.7	102.6	87.9667	112.033	0.785183	0.0205598
A0A140VKG2			Testis tissue sperm-binding protein Li 79P OS=Homo sapiens PE=2 SV=1	19.0164	8	11	7	610	69.994	4.69	86.6	91.7	85.6	106.3	116.5	113.3	87.9667	112.033	0.785183	0.00248443
Q6IBP4		LAPTM4A	LAPTM4A protein OS=Homo sapiens GN=LAPTM4A PE=2 SV=1	11.588	1	1	1	233	26.783	6.49	84.8	84.4	94.7	118.9	112.1	105.1	87.9667	112.033	0.785183	0.00993343
A0A087WU03		HNRNPDL	Heterogeneous nuclear ribonucleoprotein D-like OS=Homo sapiens GN=HNRNPDL PE=1 SV=1	31.5789	1	11	1	57	6.717	4.65	83.6	94.2	86.1	117.1	112.7	106.4	87.9667	112.067	0.784949	0.0056704
Q8WUD4		CCDC12	Coiled-coil domain-containing protein 12 OS=Homo sapiens GN=CCDC12 PE=1 SV=1	36.747	3	5	3	166	19.169	7.34	88.9	87.5	87.4	102.6	119.1	114.4	87.9333	112.033	0.784885	0.00812133
A0A024RE03		CLYBL	Citrate lyase beta like, isoform CRA_a OS=Homo sapiens GN=CLYBL PE=4 SV=1	15.2941	4	5	4	340	37.322	8.73	83.5	95	85.4	118.6	110.5	107.2	87.9667	112.1	0.784716	0.00797433
V9HW31		HEL-S-271	ATP synthase subunit beta OS=Homo sapiens GN=HEL-S-271 PE=1 SV=1	75.4253	28	207	19	529	56.525	5.4	86.1	91.1	86.6	121.8	112.3	102.1	87.9333	112.067	0.784652	0.0150223
O60287		URB1	Nucleolar pre-ribosomal-associated protein 1 OS=Homo sapiens GN=URB1 PE=1 SV=4	7.04535	10	10	10	2271	254.227	6.47	89.4	87.7	86.7	98.9	122.1	115.3	87.9333	112.1	0.784419	0.0251935
J3KQ12		BSCL2	HCG2020143, isoform CRA_b OS=Homo sapiens GN=BSCL2 PE=1 SV=1	1.93966	1	2	1	464	51.255	5.27	89.5	89.3	84.9	98.1	127.7	110.5	87.9	112.1	0.784121	0.0499391
Q9BY50		SEC11C	Signal peptidase complex catalytic subunit SEC11C OS=Homo sapiens GN=SEC11C PE=1 SV=3	14.5833	2	2	2	192	21.528	9.2	84.1	91.7	87.9	103.7	121.8	110.9	87.9	112.133	0.783888	0.0131458
Q96L91		EP400	E1A-binding protein p400 OS=Homo sapiens GN=EP400 PE=1 SV=4	4.14688	8	11	8	3159	343.276	9.19	90	89.1	84.5	103.8	114.3	118.3	87.8667	112.133	0.783591	0.00641915
Q96AA3		RFT1	Protein RFT1 homolog OS=Homo sapiens GN=RFT1 PE=1 SV=1	5.1756	3	4	3	541	60.296	8.85	85.7	93.5	84.4	114.2	109.9	112.3	87.8667	112.133	0.783591	0.00144136
D6RE79		MFSD10	Major facilitator superfamily domain-containing protein 10 OS=Homo sapiens GN=MFSD10 PE=1 SV=1	2.70833	1	2	1	480	50.399	9.69	86.6	91.4	85.6	116.4	112.4	107.7	87.8667	112.167	0.783358	0.00140665
O00217		NDUFS8	NADH dehydrogenase [ubiquinone] iron-sulfur protein 8, mitochondrial OS=Homo sapiens GN=NDUFS8 PE=1 SV=1	34.7619	7	18	7	210	23.69	6.34	83.7	95	84.8	102.2	119.6	114.6	87.8333	112.133	0.783294	0.0181931
Q8N465		D2HGDH	D-2-hydroxyglutarate dehydrogenase, mitochondrial OS=Homo sapiens GN=D2HGDH PE=1 SV=3	15.739	5	7	5	521	56.38	7.99	84.1	93.3	86.1	101.2	116.8	118.4	87.8333	112.133	0.783294	0.0168595
P61803		DAD1	Dolichyl-diphosphooligosaccharide--protein glycosyltransferase subunit DAD1 OS=Homo sapiens GN=DAD1 PE=1 SV=3	26.5487	3	10	3	113	12.489	7.08	90.1	91.6	81.8	114.3	108.9	113.2	87.8333	112.133	0.783294	0.00217559
O00116		AGPS	Alkyldihydroxyacetonephosphate synthase, peroxisomal OS=Homo sapiens GN=AGPS PE=1 SV=1	49.2401	24	55	24	658	72.866	7.34	87.4	88.7	87.4	109.6	117.1	109.8	87.8333	112.167	0.783061	0.000628883
Q99986		VRK1	Serine/threonine-protein kinase VRK1 OS=Homo sapiens GN=VRK1 PE=1 SV=1	50.7576	14	32	14	396	45.447	8.91	90.1	87.7	85.7	104.5	119.7	112.3	87.8333	112.167	0.783061	0.00598226
O15031		PLXNB2	Plexin-B2 OS=Homo sapiens GN=PLXNB2 PE=1 SV=3	21.8716	28	40	28	1838	204.997	6.24	85	92.3	86.1	112.7	112.4	111.4	87.8	112.167	0.782764	0.000453869
B7Z6Q5			Beta-galactosidase OS=Homo sapiens PE=2 SV=1	22.3448	12	21	12	725	81.752	7.94	90.8	88.6	84	102.8	122.6	111.3	87.8	112.233	0.782299	0.0158356
E9PF18		HADH	Hydroxyacyl-coenzyme A dehydrogenase, mitochondrial OS=Homo sapiens GN=HADH PE=1 SV=2	34.8718	13	24	13	390	42.097	9.26	86.1	93.2	83.9	124.6	112.7	99.5	87.7333	112.267	0.781473	0.0343105
F1CME6		HAVCR1	Hepatitis A virus cellular receptor 1a OS=Homo sapiens GN=HAVCR1 PE=2 SV=1	19.2201	5	7	5	359	38.68	6.92	90	87.5	85.6	112.3	109.1	115.6	87.7	112.333	0.780712	0.000407924
Q9H2J7		SLC6A15	Sodium-dependent neutral amino acid transporter B(0)AT2 OS=Homo sapiens GN=SLC6A15 PE=1 SV=1	3.0137	2	2	2	730	81.783	5.19	84.2	93.7	85.1	104.9	116.7	115.5	87.6667	112.367	0.780184	0.00686114
B4DKM0			cDNA FLJ51883, highly similar to Mitochondrial 39S ribosomal protein L3 OS=Homo sapiens PE=2 SV=1	29.3333	8	18	8	375	41.572	9.58	87.9	91.3	83.7	116.6	109.9	110.5	87.6333	112.333	0.780119	0.00129226
Q96HR3		MED30	Mediator of RNA polymerase II transcription subunit 30 OS=Homo sapiens GN=MED30 PE=1 SV=1	11.7978	2	2	2	178	20.264	8.27	86.7	93.8	82.4	97.8	123.4	115.9	87.6333	112.367	0.779887	0.0406482
A0A096LPI6			Uncharacterized protein (Fragment) OS=Homo sapiens PE=4 SV=2	58.4229	13	37	10	279	30.467	7.87	85.8	94.6	82.5	121.4	116.9	98.9	87.6333	112.4	0.779656	0.0332278
A8K899			cDNA FLJ77724, highly similar to Homo sapiens transcriptional adaptor 3 (NGG1 homolog, yeast)-like (TADA3L), transcript variant 1, mRNA OS=Homo sapiens PE=2 SV=1	6.94444	2	2	2	432	48.853	6.23	90	82	90.8	98.4	123.8	115	87.6	112.4	0.779359	0.0356662
B4DEG4			cDNA FLJ60435, highly similar to Heterogeneous nuclear ribonucleoprotein M OS=Homo sapiens PE=2 SV=1	67.2131	24	89	9	366	39.161	9.14	90.8	86.3	85.5	108.6	117.4	111.4	87.5333	112.467	0.778305	0.00125862
Q9NYL4		FKBP11	Peptidyl-prolyl cis-trans isomerase FKBP11 OS=Homo sapiens GN=FKBP11 PE=1 SV=1	23.3831	5	11	5	201	22.166	9.39	82.8	96.9	82.9	116.8	113.2	107.4	87.5333	112.467	0.778305	0.0100621
P09110		ACAA1	3-ketoacyl-CoA thiolase, peroxisomal OS=Homo sapiens GN=ACAA1 PE=1 SV=2	28.7736	8	17	8	424	44.264	8.44	89.3	91.6	81.7	108	115.6	113.8	87.5333	112.467	0.778305	0.00270721
A0A024RBY9		HCCS	Cytochrome c heme lyase OS=Homo sapiens GN=HCCS PE=3 SV=1	51.1194	12	24	12	268	30.582	6.68	87.3	88.4	86.9	115	112.9	109.6	87.5333	112.5	0.778074	0.000107099
O60830		TIMM17B	Mitochondrial import inner membrane translocase subunit Tim17-B OS=Homo sapiens GN=TIMM17B PE=1 SV=1	26.1628	2	5	2	172	18.261	9.03	84.2	93	85.4	125.6	106.7	105.2	87.5333	112.5	0.778074	0.0247386
Q53H12		AGK	Acylglycerol kinase, mitochondrial OS=Homo sapiens GN=AGK PE=1 SV=2	49.0521	16	41	16	422	47.107	8.09	87.9	86.5	88.1	118.5	112.8	106.1	87.5	112.467	0.778008	0.00231411
P30048		PRDX3	Thioredoxin-dependent peroxide reductase, mitochondrial OS=Homo sapiens GN=PRDX3 PE=1 SV=3	55.8594	13	87	13	256	27.675	7.78	87.7	92.8	82	126.9	111.1	99.5	87.5	112.5	0.777778	0.0427976
Q7Z2W9		MRPL21	39S ribosomal protein L21, mitochondrial OS=Homo sapiens GN=MRPL21 PE=1 SV=2	48.2927	7	10	7	205	22.8	9.89	84.1	95	83.4	120.6	111.7	105.2	87.5	112.5	0.777778	0.0127888
P82933		MRPS9	28S ribosomal protein S9, mitochondrial OS=Homo sapiens GN=MRPS9 PE=1 SV=2	48.4848	19	33	19	396	45.806	9.51	88.2	89.1	85.2	114.3	113.8	109.5	87.5	112.533	0.777547	0.000202363
Q96BR5		COA7	Cytochrome c oxidase assembly factor 7 OS=Homo sapiens GN=COA7 PE=1 SV=2	45.8874	8	13	8	231	25.692	6.02	85.7	96.5	80.3	115.3	116.2	106.1	87.5	112.533	0.777547	0.0121426
Q8IUH3		RBM45	RNA-binding protein 45 OS=Homo sapiens GN=RBM45 PE=1 SV=1	4.83193	2	2	2	476	53.469	7.17	86.2	90.4	85.8	116.3	109.3	111.9	87.4667	112.5	0.777481	0.00057441
Q96HY6		DDRGK1	DDRGK domain-containing protein 1 OS=Homo sapiens GN=DDRGK1 PE=1 SV=2	37.2611	7	12	7	314	35.589	5.12	88.4	93.8	80.2	98.5	120.7	118.3	87.4667	112.5	0.777481	0.0361386
Q86UT6		NLRX1	NLR family member X1 OS=Homo sapiens GN=NLRX1 PE=1 SV=1	14.359	9	9	9	975	107.548	7.37	88.6	91.7	81.9	111.4	115.1	111.2	87.4	112.567	0.776429	0.001343
Q86WA6		BPHL	Valacyclovir hydrolase OS=Homo sapiens GN=BPHL PE=1 SV=1	51.2027	11	19	11	291	32.522	9.14	87.7	92.1	82.4	116.4	117.4	104	87.4	112.6	0.776199	0.0080374
Q4JHB7		FOXL2	Transcription factor FOXL2 mutant 1 OS=Homo sapiens GN=FOXL2 PE=2 SV=1	7.51295	1	1	1	386	39.458	9.16	80.8	92.2	89.2	103.5	112.1	122.2	87.4	112.6	0.776199	0.0169154
Q99623		PHB2	Prohibitin-2 OS=Homo sapiens GN=PHB2 PE=1 SV=2	78.2609	23	81	23	299	33.276	9.83	87.4	90.2	84.6	117.3	113	107.6	87.4	112.633	0.775969	0.00146343
O00400		SLC33A1	Acetyl-coenzyme A transporter 1 OS=Homo sapiens GN=SLC33A1 PE=1 SV=1	7.28597	3	3	3	549	60.87	7.33	87.5	91.9	82.7	107.3	120.7	109.9	87.3667	112.633	0.775673	0.00665419
Q49A26		GLYR1	Putative oxidoreductase GLYR1 OS=Homo sapiens GN=GLYR1 PE=1 SV=3	35.0814	12	18	12	553	60.518	9.17	88.2	87.9	85.9	116.2	112	109.8	87.3333	112.667	0.775148	0.00022872
Q7Z4X2			Neuronal protein OS=Homo sapiens PE=2 SV=1	33.5443	4	10	4	158	17.931	5.43	88	90.5	83.5	111.9	116.2	109.9	87.3333	112.667	0.775148	0.000788563
V9HW63		HEL-S-97n	Epididymis secretory sperm binding protein Li 97n OS=Homo sapiens GN=HEL-S-97n PE=2 SV=1	64.9446	14	57	11	271	30.521	6.29	90.1	85.8	86	98.7	121.9	117.5	87.3	112.7	0.774623	0.0248292
O43567		RNF13	E3 ubiquitin-protein ligase RNF13 OS=Homo sapiens GN=RNF13 PE=1 SV=1	6.29921	1	2	1	381	42.787	4.98	86.8	87.6	87.4	109.9	114.6	113.6	87.2667	112.7	0.774327	6.19569e-05
Q14011		CIRBP	Cold-inducible RNA-binding protein OS=Homo sapiens GN=CIRBP PE=1 SV=1	38.3721	6	21	6	172	18.637	9.51	84.4	95.2	82.2	111.8	116.3	110.2	87.2667	112.767	0.773869	0.00445387
Q9C0D9		SELENOI	Ethanolaminephosphotransferase 1 OS=Homo sapiens GN=SELENOI PE=1 SV=3	4.53401	2	6	2	397	45.2	6.6	88.7	87.7	85.3	109	117.3	112.1	87.2333	112.8	0.773345	0.000620714
Q9BVI4		NOC4L	Nucleolar complex protein 4 homolog OS=Homo sapiens GN=NOC4L PE=1 SV=1	30.0388	9	12	9	516	58.431	7.49	97	82.2	82.4	105.1	118.6	114.6	87.2	112.767	0.773278	0.0155992
Q9BYD1		MRPL13	39S ribosomal protein L13, mitochondrial OS=Homo sapiens GN=MRPL13 PE=1 SV=1	52.2472	9	15	9	178	20.679	9.16	89.7	89.5	82.4	114.6	115.7	108	87.2	112.767	0.773278	0.00167002
A5D8W8		GGT7	Gamma-glutamyltransferase 7 OS=Homo sapiens GN=GGT7 PE=2 SV=1	1.96375	1	1	1	662	70.401	5.14	85.5	95.7	80.4	112.8	120.6	104.9	87.2	112.767	0.773278	0.0160761
Q7L592		NDUFAF7	Protein arginine methyltransferase NDUFAF7, mitochondrial OS=Homo sapiens GN=NDUFAF7 PE=1 SV=1	4.98866	2	3	2	441	49.206	8.34	86.8	89.3	85.5	107	116.5	114.8	87.2	112.767	0.773278	0.00122324
Q12962		TAF10	Transcription initiation factor TFIID subunit 10 OS=Homo sapiens GN=TAF10 PE=1 SV=1	40.367	4	6	4	218	21.698	6.57	83.2	99	79.4	105.9	112.6	119.9	87.2	112.8	0.77305	0.0240573
Q9UHG3		PCYOX1	Prenylcysteine oxidase 1 OS=Homo sapiens GN=PCYOX1 PE=1 SV=3	40.396	15	36	15	505	56.604	6.18	87.7	88.7	85.1	107	119.5	112	87.1667	112.833	0.772526	0.00247486
Q3ZAQ7		VMA21	Vacuolar ATPase assembly integral membrane protein VMA21 OS=Homo sapiens GN=VMA21 PE=1 SV=1	11.8812	1	5	1	101	11.347	7.24	88.3	92.7	80.5	116.6	110.1	111.9	87.1667	112.867	0.772298	0.00318627
A0A0K2GN21		BCKDHB	BCKDHB protein OS=Homo sapiens GN=BCKDHB PE=4 SV=1	18.6224	5	8	5	392	43.094	6.61	83.1	92.4	85.9	112	115.3	111.2	87.1333	112.833	0.77223	0.00105509
A0A024R5Z7		ANXA2	Annexin OS=Homo sapiens GN=ANXA2 PE=3 SV=1	85.5457	39	250	27	339	38.58	7.75	84.7	91.1	85.6	115	118.2	105.4	87.1333	112.867	0.772002	0.00403759
A0A0S2Z4Z6		SRRM1	Serine/arginine repetitive matrix 1 isoform 2 (Fragment) OS=Homo sapiens GN=SRRM1 PE=2 SV=1	10.8932	7	13	7	918	103.919	11.84	89.8	85	86.6	103.6	124.4	110.6	87.1333	112.867	0.772002	0.0148122
B2RD09			cDNA, FLJ96406, highly similar to Homo sapiens NOL1/NOP2/Sun domain family, member 5 (NSUN5), transcript variant 1, mRNA OS=Homo sapiens PE=2 SV=1	53.6481	19	29	18	466	50.363	9.03	88.5	87.5	85.3	100.8	123	114.9	87.1	112.9	0.771479	0.0170149
O15091		KIAA0391	Mitochondrial ribonuclease P protein 3 OS=Homo sapiens GN=KIAA0391 PE=1 SV=2	24.5283	10	12	10	583	67.272	8.78	87.3	90.9	83.1	102.1	115.6	121	87.1	112.9	0.771479	0.013048
P30530		AXL	Tyrosine-protein kinase receptor UFO OS=Homo sapiens GN=AXL PE=1 SV=3	11.2975	6	9	6	894	98.273	5.43	84.5	89.9	86.8	114.2	111	113.6	87.0667	112.933	0.770956	0.000150883
O60635		TSPAN1	Tetraspanin-1 OS=Homo sapiens GN=TSPAN1 PE=1 SV=2	7.46888	2	3	2	241	26.283	5.25	84.5	93	83.7	118.5	112.2	108.2	87.0667	112.967	0.770729	0.0035852
Q9H845		ACAD9	Acyl-CoA dehydrogenase family member 9, mitochondrial OS=Homo sapiens GN=ACAD9 PE=1 SV=1	38.3253	19	28	19	621	68.717	7.96	87.9	88.4	84.8	117.3	114	107.7	87.0333	113	0.770206	0.00102177
Q9BUE6		ISCA1	Iron-sulfur cluster assembly 1 homolog, mitochondrial OS=Homo sapiens GN=ISCA1 PE=1 SV=1	20.155	2	2	2	129	14.17	9.07	90.6	92.9	77.5	119	112.2	107.9	87	113.033	0.769684	0.0108092
O75489		NDUFS3	NADH dehydrogenase [ubiquinone] iron-sulfur protein 3, mitochondrial OS=Homo sapiens GN=NDUFS3 PE=1 SV=1	46.9697	12	26	12	264	30.223	7.5	87.9	91.4	81.6	114.6	115.7	108.8	86.9667	113.033	0.76939	0.00188672
A0A024R5U8		C15orf15	Chromosome 15 open reading frame 15, isoform CRA_a OS=Homo sapiens GN=C15orf15 PE=3 SV=1	16.5644	2	6	2	163	19.608	9.98	87.5	90.9	82.5	98.3	118.7	122.1	86.9667	113.033	0.76939	0.0290373
Q8N5M1		ATPAF2	ATP synthase mitochondrial F1 complex assembly factor 2 OS=Homo sapiens GN=ATPAF2 PE=1 SV=1	39.7924	9	12	9	289	32.752	7.09	88.8	89.6	82.5	100	118.4	120.9	86.9667	113.1	0.768936	0.0198796
A0A024RD03		MRPS10	Mitochondrial ribosomal protein S10, isoform CRA_a OS=Homo sapiens GN=MRPS10 PE=4 SV=1	25.8706	4	7	4	201	22.985	8	86.4	94.5	79.9	122.9	111.4	104.9	86.9333	113.067	0.768868	0.0179471
O00567		NOP56	Nucleolar protein 56 OS=Homo sapiens GN=NOP56 PE=1 SV=4	61.2795	31	70	31	594	66.009	9.19	87.7	88.1	84.9	107.3	123	108.8	86.9	113.033	0.7688	0.00687764
Q7L3T8		PARS2	Probable proline--tRNA ligase, mitochondrial OS=Homo sapiens GN=PARS2 PE=1 SV=1	16	5	5	5	475	53.228	8.1	89.1	89	82.6	114.4	111.1	113.7	86.9	113.067	0.768573	0.000384505
J3KPF3		SLC3A2	4F2 cell-surface antigen heavy chain OS=Homo sapiens GN=SLC3A2 PE=1 SV=1	49.6038	26	88	26	631	68.059	5.05	87.7	88.3	84.6	107.8	117.5	114.1	86.8667	113.133	0.767826	0.00101707
Q9GZT3		SLIRP	SRA stem-loop-interacting RNA-binding protein, mitochondrial OS=Homo sapiens GN=SLIRP PE=1 SV=1	78.8991	9	23	9	109	12.341	10.24	84.5	94.2	81.9	111.2	116.9	111.3	86.8667	113.133	0.767826	0.00330415
Q92506		HSD17B8	Estradiol 17-beta-dehydrogenase 8 OS=Homo sapiens GN=HSD17B8 PE=1 SV=2	25.6705	5	11	5	261	26.957	6.54	82.3	98.8	79.5	114.3	112.1	113.1	86.8667	113.167	0.767599	0.0122168
A0A024QYX0		EBP	Emopamil binding protein OS=Homo sapiens GN=EBP PE=2 SV=1	16.5217	3	12	3	230	26.336	7.9	94.3	85.8	80.5	126.4	115.4	97.7	86.8667	113.167	0.767599	0.047091
J3QTA6		CHCHD6	MICOS complex subunit OS=Homo sapiens GN=CHCHD6 PE=1 SV=1	27.3438	5	6	5	256	28.8	9.44	86.1	90.4	84	113.6	107.8	118.2	86.8333	113.2	0.767079	0.00175392
Q8TBP6		SLC25A40	Solute carrier family 25 member 40 OS=Homo sapiens GN=SLC25A40 PE=1 SV=1	17.4556	5	8	5	338	38.1	9.35	83	96	81.4	117.2	111.3	111.1	86.8	113.2	0.766784	0.00633738
A0A024R3N2		NFRKB	Nuclear factor related to kappaB binding protein, isoform CRA_a OS=Homo sapiens GN=NFRKB PE=4 SV=1	2.26112	1	1	1	1371	147.295	9.06	79.8	97.4	83.1	112.6	120.6	106.3	86.7667	113.167	0.766716	0.0178409
Q9NPG3		UBN1	Ubinuclein-1 OS=Homo sapiens GN=UBN1 PE=1 SV=2	1.41093	1	1	1	1134	121.446	9.33	85.7	90.1	84.6	106.2	127	106.5	86.8	113.233	0.766559	0.0202903
P30837		ALDH1B1	Aldehyde dehydrogenase X, mitochondrial OS=Homo sapiens GN=ALDH1B1 PE=1 SV=3	42.94	20	41	17	517	57.17	6.8	88.7	87.1	84.5	117.1	115.4	107.2	86.7667	113.233	0.766264	0.00129957
A0A0J9YXJ0		CELF2	CUGBP Elav-like family member 2 OS=Homo sapiens GN=CELF2 PE=1 SV=1	5.81614	3	4	1	533	57.085	8.94	85	89.7	85.4	102.7	118.5	118.7	86.7	113.3	0.765225	0.00847445
Q6IAX1		FDFT1	FDFT1 protein OS=Homo sapiens GN=FDFT1 PE=2 SV=1	35.4916	12	20	12	417	48.084	6.54	92	78.8	89.2	116.9	114.6	108.5	86.6667	113.333	0.764706	0.00488491
Q53F11			tRNA isopentenyltransferase 1 variant (Fragment) OS=Homo sapiens PE=2 SV=1	7.28051	2	2	2	467	52.695	8.03	95.2	78.5	86.3	113.6	113.3	113.1	86.6667	113.333	0.764706	0.0052416
A4D1W8		UCC1	Ependymin related protein 1 (Zebrafish), isoform CRA_b OS=Homo sapiens GN=UCC1 PE=4 SV=1	15.407	5	8	5	344	38.126	9.58	87.7	88.9	83.3	95.9	127.5	116.7	86.6333	113.367	0.764187	0.0470819
Q8N183		NDUFAF2	Mimitin, mitochondrial OS=Homo sapiens GN=NDUFAF2 PE=1 SV=1	63.9053	10	16	10	169	19.844	8.97	91.5	86.1	82.3	116	117.2	106.9	86.6333	113.367	0.764187	0.00314287
O75486		SUPT3H	Transcription initiation protein SPT3 homolog OS=Homo sapiens GN=SUPT3H PE=1 SV=2	3.00752	1	2	1	399	44.334	8.48	85	93.9	81	117.8	114.3	108	86.6333	113.367	0.764187	0.00497878
P05165		PCCA	Propionyl-CoA carboxylase alpha chain, mitochondrial OS=Homo sapiens GN=PCCA PE=1 SV=4	2.88462	1	1	1	728	80.008	7.52	83.2	83.3	93.3	105.5	113.4	121.2	86.6	113.367	0.763893	0.00897595
P54725		RAD23A	UV excision repair protein RAD23 homolog A OS=Homo sapiens GN=RAD23A PE=1 SV=1	11.8457	4	6	2	363	39.585	4.58	87.3	85.1	87.3	104.3	118.4	117.7	86.5667	113.467	0.762926	0.00442267
P15529		CD46	Membrane cofactor protein OS=Homo sapiens GN=CD46 PE=1 SV=3	2.29592	1	1	1	392	43.719	6.74	87.5	91.5	80.7	105.3	116.2	118.9	86.5667	113.467	0.762926	0.00671632
Q8N4T8		CBR4	Carbonyl reductase family member 4 OS=Homo sapiens GN=CBR4 PE=1 SV=3	25.7384	3	6	3	237	25.285	9.33	83.6	95.7	80.3	124.6	111.9	103.9	86.5333	113.467	0.762632	0.0242445
P51648		ALDH3A2	Fatty aldehyde dehydrogenase OS=Homo sapiens GN=ALDH3A2 PE=1 SV=1	43.0928	18	54	18	485	54.813	7.88	88	87.8	83.7	118	118.5	104	86.5	113.5	0.762115	0.00550781
O43688		PLPP2	Phospholipid phosphatase 2 OS=Homo sapiens GN=PLPP2 PE=1 SV=1	8.68056	2	2	2	288	32.553	8.35	85.4	89.2	84.9	112.6	115.2	112.7	86.5	113.5	0.762115	7.26624e-05
P45973		CBX5	Chromobox protein homolog 5 OS=Homo sapiens GN=CBX5 PE=1 SV=1	53.4031	9	27	8	191	22.211	5.86	85.2	88.1	86.1	117.4	111.5	111.6	86.4667	113.5	0.761821	0.000222061
O96011		PEX11B	Peroxisomal membrane protein 11B OS=Homo sapiens GN=PEX11B PE=1 SV=1	16.9884	4	6	4	259	28.413	9.85	84.2	90.9	84.3	117.3	115.8	107.5	86.4667	113.533	0.761597	0.00199059
P49406		MRPL19	39S ribosomal protein L19, mitochondrial OS=Homo sapiens GN=MRPL19 PE=1 SV=2	33.2192	10	15	10	292	33.514	9.5	88.2	88.4	82.8	118.5	109.2	113	86.4667	113.567	0.761374	0.00114891
B4DPG9			cDNA FLJ59630, highly similar to Growth hormone-inducible transmembrane protein OS=Homo sapiens PE=2 SV=1	14.9425	5	7	5	348	37.511	9.89	87.7	88.9	82.7	116.6	114.7	109.4	86.4333	113.567	0.76108	0.000699565
A0A024RDM4		MRP63	Mitochondrial ribosomal protein 63, isoform CRA_a OS=Homo sapiens GN=MRP63 PE=4 SV=1	19.6078	2	7	2	102	12.259	11.44	85.9	93	80.3	126.9	113.1	100.8	86.4	113.6	0.760563	0.0315749
Q6MZS5		DKFZp686A13234	Putative uncharacterized protein DKFZp686A13234 (Fragment) OS=Homo sapiens GN=DKFZp686A13234 PE=2 SV=1	45.8401	25	82	1	613	68.317	8.91	94.4	82.3	82.3	109.5	123.7	107.8	86.3333	113.667	0.759531	0.0133272
A0A024R6W2		NUDT21	Nudix (Nucleoside diphosphate linked moiety X)-type motif 21, isoform CRA_a OS=Homo sapiens GN=NUDT21 PE=4 SV=1	42.2907	11	32	11	227	26.211	8.82	87.7	86	85.3	100.2	124.8	116	86.3333	113.667	0.759531	0.0194424
Q4VC31		CCDC58	Coiled-coil domain-containing protein 58 OS=Homo sapiens GN=CCDC58 PE=1 SV=1	64.5833	7	14	7	144	16.609	7.81	83.1	95.2	80.7	123.2	109.3	108.6	86.3333	113.7	0.759308	0.0138493
O15551		CLDN3	Claudin-3 OS=Homo sapiens GN=CLDN3 PE=1 SV=1	6.36364	1	1	1	220	23.303	8.05	89.9	90.1	79	115.5	122.5	103.1	86.3333	113.7	0.759308	0.0154538
G3XAN8		TIMM8B	Mitochondrial import inner membrane translocase subunit Tim8 B OS=Homo sapiens GN=TIMM8B PE=1 SV=1	29.5918	3	5	3	98	11.148	8.1	86.2	92.9	79.8	128.9	106.6	105.5	86.3	113.667	0.759238	0.0324073
P62851		RPS25	40S ribosomal protein S25 OS=Homo sapiens GN=RPS25 PE=1 SV=1	29.6	5	21	5	125	13.734	10.11	88.3	81.1	89.5	103.1	119.2	118.7	86.3	113.667	0.759238	0.0097477
Q9BXK5		BCL2L13	Bcl-2-like protein 13 OS=Homo sapiens GN=BCL2L13 PE=1 SV=1	41.0309	11	18	7	485	52.691	4.44	86.5	88.3	84.1	113.9	119.8	107.4	86.3	113.7	0.759015	0.00192656
Q8IZR3			Thymidine kinase OS=Homo sapiens PE=2 SV=1	17.2638	3	4	3	307	35.417	9.61	81.1	94.2	83.6	101.5	112.7	126.9	86.3	113.7	0.759015	0.0307389
O43933		PEX1	Peroxisome biogenesis factor 1 OS=Homo sapiens GN=PEX1 PE=1 SV=1	1.40296	2	2	2	1283	142.778	6.33	88.5	92.4	78	98.3	115.9	127	86.3	113.733	0.758792	0.0432712
Q96GS4		BORCS6	BLOC-1-related complex subunit 6 OS=Homo sapiens GN=BORCS6 PE=1 SV=2	14.2857	3	3	3	357	37.204	5.76	90.5	86.8	81.5	96.9	116.5	127.8	86.2667	113.733	0.758499	0.0431166
B3KM95			Phosphatidate cytidylyltransferase OS=Homo sapiens PE=2 SV=1	8.53933	2	2	2	445	51.326	7.09	85.9	93.2	79.6	100.2	128.9	112.1	86.2333	113.733	0.758206	0.0404495
A0A140VK72			Testis secretory sperm-binding protein Li 199a OS=Homo sapiens PE=2 SV=1	16.1359	6	9	6	471	51.895	5.76	84.4	89.9	84.3	97.7	120.9	122.8	86.2	113.8	0.757469	0.0289945
A0A087WT44		HMOX2	Heme oxygenase 2 OS=Homo sapiens GN=HMOX2 PE=1 SV=1	39.1892	13	31	1	370	41.643	5.44	78.9	102.7	76.9	106.6	120.9	114	86.1667	113.833	0.756955	0.0404075
Q8WVI0		SMIM4	Small integral membrane protein 4 OS=Homo sapiens GN=SMIM4 PE=1 SV=2	15.7143	1	1	1	70	8.691	10.87	86	92.9	79.6	111.2	109.9	120.5	86.1667	113.867	0.756733	0.00552815
H0UI06		COX7A2	Cytochrome c oxidase subunit 7A2, mitochondrial OS=Homo sapiens GN=COX7A2 PE=1 SV=1	21.7391	3	12	3	115	12.836	9.13	80.8	96.8	80.7	121.5	113.2	106.9	86.1	113.867	0.756148	0.015198
Q15120		PDK3	[Pyruvate dehydrogenase (acetyl-transferring)] kinase isozyme 3, mitochondrial OS=Homo sapiens GN=PDK3 PE=1 SV=1	8.12808	3	4	3	406	46.909	8.37	88.4	87.9	82	118.8	100.7	122.1	86.1	113.867	0.756148	0.0162887
Q9P1F3		ABRACL	Costars family protein ABRACL OS=Homo sapiens GN=ABRACL PE=1 SV=1	70.3704	4	7	4	81	9.051	6.29	83	76.6	98.7	99.2	124	118.5	86.1	113.9	0.755926	0.0495684
Q9UNZ5		C19orf53	Leydig cell tumor 10 kDa protein homolog OS=Homo sapiens GN=C19orf53 PE=1 SV=1	25.2525	3	4	3	99	10.57	11.55	92.8	85.7	79.8	109.3	109.7	122.7	86.1	113.9	0.755926	0.00862706
Q5T5X7		BEND3	BEN domain-containing protein 3 OS=Homo sapiens GN=BEND3 PE=1 SV=1	3.98551	2	2	2	828	94.415	5.43	90	85.1	83.1	100.7	123.2	117.8	86.0667	113.9	0.755634	0.0171214
A0A024RAF7		ECE1	Endothelin converting enzyme 1, isoform CRA_b OS=Homo sapiens GN=ECE1 PE=4 SV=1	46.1039	31	68	31	770	87.108	5.88	86.8	88.8	82.6	106.1	119	116.7	86.0667	113.933	0.755413	0.00310896
Q8NFV4		ABHD11	Protein ABHD11 OS=Homo sapiens GN=ABHD11 PE=1 SV=1	48.8889	13	22	13	315	34.668	9.48	85.1	90	83	107.3	126.3	108.2	86.0333	113.933	0.75512	0.0129036
B4DF93			Mitochondrial GTPase 1 OS=Homo sapiens PE=2 SV=1	21.9081	5	5	5	283	31.643	8.91	88.2	89.7	80.2	114.3	112	115.6	86.0333	113.967	0.754899	0.000872539
Q9NVI7		ATAD3A	ATPase family AAA domain-containing protein 3A OS=Homo sapiens GN=ATAD3A PE=1 SV=2	44.795	28	66	11	634	71.325	8.98	88.7	84	85.3	106.2	123.6	112.2	86	114	0.754386	0.00612356
A8MXV4		NUDT19	Nucleoside diphosphate-linked moiety X motif 19 OS=Homo sapiens GN=NUDT19 PE=1 SV=1	28.2667	6	9	6	375	42.207	7.64	84.5	88.3	85.1	111.1	116.2	114.8	85.9667	114.033	0.753873	0.000128705
Q6I9V5		SLC25A6	SLC25A6 protein OS=Homo sapiens GN=SLC25A6 PE=2 SV=1	62.4161	20	100	3	298	32.845	9.74	85.2	89.3	83.2	114.4	117.6	110.4	85.9	114.133	0.752629	0.000507338
Q8IY26		PLPP6	Phospholipid phosphatase 6 OS=Homo sapiens GN=PLPP6 PE=1 SV=3	13.8983	2	3	2	295	32.173	9.99	86.4	89.4	81.7	121	107.7	113.8	85.8333	114.167	0.751825	0.00311798
B2RE40			cDNA, FLJ96911, highly similar to Homo sapiens nucleosomal binding protein 1 (NSBP1), mRNA OS=Homo sapiens PE=2 SV=1	28.3688	9	27	9	282	31.505	4.59	84.4	90.5	82.6	106.8	120.4	115.4	85.8333	114.2	0.751605	0.00361149
Q13084		MRPL28	39S ribosomal protein L28, mitochondrial OS=Homo sapiens GN=MRPL28 PE=1 SV=4	41.4062	9	12	9	256	30.138	8.29	81.8	93.3	82.4	115	111.6	116	85.8333	114.2	0.751605	0.00202475
V9HWH9		HEL-S-43	Protein S100 OS=Homo sapiens GN=HEL-S-43 PE=2 SV=1	56.1905	7	30	7	105	11.733	7.12	80.9	90	86.5	110.8	124.5	107.2	85.8	114.167	0.751533	0.00859311
D3DSQ1		ASAH1	N-acylsphingosine amidohydrolase (Acid ceramidase) 1, isoform CRA_c OS=Homo sapiens GN=ASAH1 PE=4 SV=1	16.3004	7	10	7	546	60.644	8.81	84.9	88.4	84	100.6	123.1	118.9	85.7667	114.2	0.751022	0.0155926
Q8N4V1		MMGT1	Membrane magnesium transporter 1 OS=Homo sapiens GN=MMGT1 PE=1 SV=1	25.1908	2	5	2	131	14.677	9.16	87.2	93.1	77	118.3	107.3	117	85.7667	114.2	0.751022	0.00824942
O00481		BTN3A1	Butyrophilin subfamily 3 member A1 OS=Homo sapiens GN=BTN3A1 PE=1 SV=3	2.72904	1	1	1	513	57.641	8.03	93	87.6	76.7	109.8	102.3	130.6	85.7667	114.233	0.750802	0.0429749
P51991		HNRNPA3	Heterogeneous nuclear ribonucleoprotein A3 OS=Homo sapiens GN=HNRNPA3 PE=1 SV=2	56.3492	27	112	3	378	39.571	9.01	86.7	87.1	83.4	124.8	114.5	103.5	85.7333	114.267	0.750292	0.0103579
A8K7H4			Origin recognition complex subunit 4 OS=Homo sapiens PE=2 SV=1	11.4679	4	4	4	436	50.361	7.96	86.3	82.7	88.2	97.8	121.6	123.4	85.7333	114.267	0.750292	0.0274173
P51398		DAP3	28S ribosomal protein S29, mitochondrial OS=Homo sapiens GN=DAP3 PE=1 SV=1	42.7136	16	31	16	398	45.538	8.88	85.3	88.3	83.6	108	119.8	115	85.7333	114.267	0.750292	0.00150829
Q96EU7		C1GALT1C1	C1GALT1-specific chaperone 1 OS=Homo sapiens GN=C1GALT1C1 PE=1 SV=1	6.28931	2	2	2	318	36.358	6.84	92	88.5	76.7	104.2	114.6	124.1	85.7333	114.3	0.750073	0.0179701
E5KNY5		LRPPRC	Leucine-rich PPR-motif containing OS=Homo sapiens GN=LRPPRC PE=4 SV=1	61.1191	81	283	81	1394	157.805	6.13	88.3	84	84.8	108.9	123.9	110.1	85.7	114.3	0.749781	0.00459009
Q75QN2		INTS8	Integrator complex subunit 8 OS=Homo sapiens GN=INTS8 PE=1 SV=1	3.21608	2	2	2	995	113.016	7.05	88.1	85.2	83.7	101.8	122.3	118.9	85.6667	114.333	0.749271	0.0114351
Q14197		MRPL58	Peptidyl-tRNA hydrolase ICT1, mitochondrial OS=Homo sapiens GN=MRPL58 PE=1 SV=1	31.068	6	11	6	206	23.615	10.07	84.5	91.1	81.3	114.7	117.4	110.9	85.6333	114.333	0.74898	0.0011364
Q9GZP1		NRSN2	Neurensin-2 OS=Homo sapiens GN=NRSN2 PE=2 SV=1	12.7451	1	1	1	204	21.969	4.83	75	92.6	89.2	97.9	126.3	119	85.6	114.4	0.748252	0.0460296
A0A024RBS2		RPLP0	60S acidic ribosomal protein P0 OS=Homo sapiens GN=RPLP0 PE=3 SV=1	66.2461	18	65	18	317	34.252	5.97	87	80	89.8	107	115.8	120.4	85.6	114.4	0.748252	0.00416663
Q9H2U2		PPA2	Inorganic pyrophosphatase 2, mitochondrial OS=Homo sapiens GN=PPA2 PE=1 SV=2	44.6108	12	33	3	334	37.896	7.39	84	89.9	82.6	118.4	119.9	105.3	85.5	114.533	0.746508	0.00486673
Q86Y79		PTRH1	Probable peptidyl-tRNA hydrolase OS=Homo sapiens GN=PTRH1 PE=1 SV=1	11.6822	1	1	1	214	22.922	10.56	84.2	92.4	79.9	123.6	114.6	105.4	85.5	114.533	0.746508	0.0105644
Q59EP1			Annexin (Fragment) OS=Homo sapiens PE=2 SV=1	38.2353	19	47	19	510	54.858	7.27	83.3	86.5	86.6	107.1	119.8	116.7	85.4667	114.533	0.746217	0.00185787
A0A024R1V6		PCGF2	Polycomb group ring finger 2, isoform CRA_b OS=Homo sapiens GN=PCGF2 PE=1 SV=1	7.84884	1	2	1	344	37.764	7.96	86.9	84.7	84.8	111.7	117.2	114.7	85.4667	114.533	0.746217	7.59623e-05
P99999		CYCS	Cytochrome c OS=Homo sapiens GN=CYCS PE=1 SV=2	61.9048	8	23	8	105	11.741	9.57	84.1	87.2	84.9	125.3	113.8	104.7	85.4	114.6	0.745201	0.00839558
Q53GR7			Solute carrier family 25, member 13 (Citrin) variant (Fragment) OS=Homo sapiens PE=2 SV=1	45.3333	22	54	17	675	74.07	8.38	84.5	86.5	85.1	116.9	114.9	112.1	85.3667	114.633	0.744693	4.2093e-05
P62745		RHOB	Rho-related GTP-binding protein RhoB OS=Homo sapiens GN=RHOB PE=1 SV=1	40.8163	4	12	2	196	22.109	5.24	88	84.3	83.8	124.7	107.7	111.5	85.3667	114.633	0.744693	0.0053203
A0A024R2F8		CHCHD4	Coiled-coil-helix-coiled-coil-helix domain containing 4, isoform CRA_b OS=Homo sapiens GN=CHCHD4 PE=4 SV=1	35.4839	4	5	4	155	17.374	4.39	94.4	83.6	78.1	109.7	126.1	108.1	85.3667	114.633	0.744693	0.0173831
Q549C5		MST065	HCG2010808, isoform CRA_a OS=Homo sapiens GN=MST065 PE=1 SV=1	48.5915	5	18	5	142	15.512	4.34	82.6	93.1	80	124.4	105.4	114.5	85.2333	114.767	0.742666	0.0121757
Q9H857		NT5DC2	5'-nucleotidase domain-containing protein 2 OS=Homo sapiens GN=NT5DC2 PE=1 SV=1	20.5769	8	10	8	520	60.68	6.77	86.4	86.2	83.1	124	111.3	109	85.2333	114.767	0.742666	0.00349931
Q8N983		MRPL43	39S ribosomal protein L43, mitochondrial OS=Homo sapiens GN=MRPL43 PE=1 SV=1	30.6977	6	9	2	215	23.416	8.65	85.3	91.3	79	124.4	113.5	106.5	85.2	114.8	0.74216	0.00933711
Q9NX18		SDHAF2	Succinate dehydrogenase assembly factor 2, mitochondrial OS=Homo sapiens GN=SDHAF2 PE=1 SV=1	34.9398	6	11	6	166	19.587	6.8	88.6	85.7	81.3	121.2	116	107.3	85.2	114.833	0.741945	0.00293146
P26232		CTNNA2	Catenin alpha-2 OS=Homo sapiens GN=CTNNA2 PE=1 SV=5	13.2214	10	17	1	953	105.247	5.71	83.2	80.8	91.4	103.3	125.4	115.9	85.1333	114.867	0.741149	0.0142291
P48047		ATP5O	ATP synthase subunit O, mitochondrial OS=Homo sapiens GN=ATP5O PE=1 SV=1	53.5211	9	31	9	213	23.263	9.96	85.1	87.7	82.6	118.5	121	105.1	85.1333	114.867	0.741149	0.00447269
O75063		FAM20B	Glycosaminoglycan xylosylkinase OS=Homo sapiens GN=FAM20B PE=1 SV=1	2.20049	1	1	1	409	46.403	6.87	96.8	81.7	76.8	117.7	119.5	107.5	85.1	114.9	0.740644	0.0136228
Q9BVX2		TMEM106C	Transmembrane protein 106C OS=Homo sapiens GN=TMEM106C PE=1 SV=1	6.8	1	2	1	250	27.857	6.77	81.6	81.9	91.7	100.4	113.5	130.9	85.0667	114.933	0.740139	0.0340169
Q49B96		COX19	Cytochrome c oxidase assembly protein COX19 OS=Homo sapiens GN=COX19 PE=1 SV=1	24.4444	2	3	2	90	10.387	8.72	80.2	94.4	80.6	120.9	115.9	108.1	85.0667	114.967	0.739925	0.00745409
B4DFE9			cDNA FLJ59619, highly similar to Epoxide hydrolase 2 (EC 3.3.2.3) OS=Homo sapiens PE=2 SV=1	4.02098	1	1	1	572	64.689	6.54	93.2	88.2	73.6	103	119.6	122.4	85	115	0.73913	0.0236989
A0A024RA97		PQLC2	PQ loop repeat containing 2, isoform CRA_c OS=Homo sapiens GN=PQLC2 PE=4 SV=1	4.46735	1	1	1	291	31.927	8.05	78.5	95.8	80.6	107.6	116.6	120.9	84.9667	115.033	0.738626	0.0109985
B2R932			cDNA, FLJ94187, highly similar to Homo sapiens CD99 antigen (CD99), mRNA OS=Homo sapiens PE=2 SV=1	9.72973	1	1	1	185	18.935	4.82	79.1	92	83.8	113.1	119.1	112.9	84.9667	115.033	0.738626	0.00216914
A0A0C4DFU2		SOD2	Superoxide dismutase OS=Homo sapiens GN=SOD2 PE=1 SV=1	44.5946	11	82	11	222	24.735	8.25	89.8	80.3	84.7	98.2	133.9	113.1	84.9333	115.067	0.738123	0.0481446
Q96DV4		MRPL38	39S ribosomal protein L38, mitochondrial OS=Homo sapiens GN=MRPL38 PE=1 SV=2	32.1053	10	14	10	380	44.568	7.53	87.3	86.3	81.2	117.7	118.5	109.1	84.9333	115.1	0.737909	0.00105466
A0A0S2Z559		RAF1	V-raf-1 murine leukemia viral oncogene-like protein 1 isoform 2 (Fragment) OS=Homo sapiens GN=RAF1 PE=2 SV=1	4.79042	2	3	1	668	75.347	9.39	70.3	86.7	97.8	105.9	117.8	121.6	84.9333	115.1	0.737909	0.0313802
A0A087WUW9		ARL15	ADP-ribosylation factor-like protein 15 OS=Homo sapiens GN=ARL15 PE=1 SV=1	18.1373	2	2	2	204	22.862	5.63	90.2	82.8	81.6	110	118.6	116.8	84.8667	115.133	0.737116	0.00128463
Q0IIN1		KRT77	Keratin 77 OS=Homo sapiens GN=KRT77 PE=1 SV=1	8.3045	6	16	2	578	61.764	5.85	81.7	95.4	77.4	129.4	107.1	109	84.8333	115.167	0.736614	0.0277117
V5LDF1		HLA-A	MHC class I antigen (Fragment) OS=Homo sapiens GN=HLA-A PE=4 SV=1	23.6111	1	2	1	72	8.522	6.04	78.4	93	83.1	108.2	120.7	116.6	84.8333	115.167	0.736614	0.00585363
F8W914		RTN4	Reticulon OS=Homo sapiens GN=RTN4 PE=1 SV=1	43.1884	9	52	1	345	37.121	4.77	84.9	83	86.5	120.5	118	107.1	84.8	115.2	0.736111	0.00199706
Q9UFN0		NIPSNAP3A	Protein NipSnap homolog 3A OS=Homo sapiens GN=NIPSNAP3A PE=1 SV=2	30.7692	6	9	6	247	28.449	9.16	81	90.8	82.5	119.6	116.7	109.5	84.7667	115.267	0.735396	0.00204663
B4DUQ1			cDNA FLJ54552, highly similar to Heterogeneous nuclear ribonucleoprotein K OS=Homo sapiens PE=2 SV=1	67.1982	32	181	4	439	48.48	5.92	88.9	81.1	84.2	106.3	128.6	110.9	84.7333	115.267	0.735107	0.0130435
Q96DB5		RMDN1	Regulator of microtubule dynamics protein 1 OS=Homo sapiens GN=RMDN1 PE=1 SV=1	45.8599	14	24	8	314	35.785	8.5	83.7	91.5	78.8	119.4	123.5	103.2	84.6667	115.367	0.733892	0.0131166
E5E079		COX2	Cytochrome c oxidase subunit 2 OS=Homo sapiens GN=COX2 PE=3 SV=1	30.837	7	45	1	227	25.543	4.89	83.5	96.2	74.2	128.7	117	100.4	84.6333	115.367	0.733603	0.0417006
A0A024RDQ7		MTIF3	Mitochondrial translational initiation factor 3, isoform CRA_a OS=Homo sapiens GN=MTIF3 PE=4 SV=1	7.55396	1	1	1	278	31.672	9.69	74.7	101.5	77.7	122.6	116.2	107.4	84.6333	115.4	0.733391	0.0322746
A0A024R074		SYBL1	Synaptobrevin-like 1, isoform CRA_b OS=Homo sapiens GN=SYBL1 PE=3 SV=1	28.4615	5	10	5	260	30.197	8.37	85.3	86.4	82	105.6	123.5	117.2	84.5667	115.433	0.732602	0.00465406
Q9BYC9		MRPL20	39S ribosomal protein L20, mitochondrial OS=Homo sapiens GN=MRPL20 PE=1 SV=1	40.9396	6	12	6	149	17.432	10.86	85.5	87.1	81.1	113.2	120.5	112.6	84.5667	115.433	0.732602	0.00057787
P15291		B4GALT1	Beta-1,4-galactosyltransferase 1 OS=Homo sapiens GN=B4GALT1 PE=1 SV=5	22.1106	5	8	4	398	43.892	8.65	81	88.6	83.8	96.4	128.3	121.9	84.4667	115.533	0.731102	0.0359115
A0A024R8L7		ACOX1	Acyl-coenzyme A oxidase OS=Homo sapiens GN=ACOX1 PE=3 SV=1	27.2727	12	20	12	660	74.638	7.62	83.5	86.8	83	116.9	118.6	111.2	84.4333	115.567	0.730603	0.000252672
O00506		STK25	Serine/threonine-protein kinase 25 OS=Homo sapiens GN=STK25 PE=1 SV=1	18.3099	6	15	1	426	48.082	6.74	81.7	84.7	86.8	102	112.5	132.4	84.4	115.633	0.729893	0.0259035
P17096		HMGA1	High mobility group protein HMG-I/HMG-Y OS=Homo sapiens GN=HMGA1 PE=1 SV=3	51.4019	6	17	2	107	11.669	10.32	86.3	85.3	81.4	133.8	113.2	100	84.3333	115.667	0.729107	0.0345216
Q8NBK3		SUMF1	Sulfatase-modifying factor 1 OS=Homo sapiens GN=SUMF1 PE=1 SV=3	9.09091	2	3	2	374	40.531	6.65	79.9	89.3	83.8	106.6	122.3	118.1	84.3333	115.667	0.729107	0.00446919
Q9BXW7		HDHD5	Haloacid dehalogenase-like hydrolase domain-containing 5 OS=Homo sapiens GN=HDHD5 PE=1 SV=1	32.1513	9	15	9	423	46.292	8.13	80.9	91.8	80.2	99.1	131.4	116.6	84.3	115.7	0.728608	0.0355057
Q9Y6X3		MAU2	MAU2 chromatid cohesion factor homolog OS=Homo sapiens GN=MAU2 PE=1 SV=2	1.14192	1	1	1	613	69.037	7.25	101.5	77.7	73.6	105.8	118	123.5	84.2667	115.767	0.727901	0.0360896
A8K2Q6			Peptidyl-prolyl cis-trans isomerase OS=Homo sapiens PE=2 SV=1	9.90566	2	3	2	212	22.703	8.4	87.2	89.5	75.9	105.3	129.7	112.4	84.2	115.8	0.727116	0.0195633
P30626		SRI	Sorcin OS=Homo sapiens GN=SRI PE=1 SV=1	66.6667	12	36	12	198	21.662	5.59	81.1	86.4	85.1	107.6	131.5	108.4	84.2	115.833	0.726906	0.016741
A0A075B710		TRAJ39	T-cell receptor alpha joining 39 (Fragment) OS=Homo sapiens GN=TRAJ39 PE=4 SV=1	76.1905	1	1	1	21	2.201	11	92.3	87.1	73.2	105	119.5	123	84.2	115.833	0.726906	0.0162687
Q9NUN5		LMBRD1	Probable lysosomal cobalamin transporter OS=Homo sapiens GN=LMBRD1 PE=1 SV=1	3.33333	1	3	1	540	61.349	7.77	81.2	91.4	79.9	111.1	120.7	115.7	84.1667	115.833	0.726619	0.00228136
A0A087WSV0		BCL2L12	Bcl-2-like protein 12 OS=Homo sapiens GN=BCL2L12 PE=1 SV=1	15.2	3	4	3	250	26.891	5.72	83	89.9	79.5	100.2	124.8	122.6	84.1333	115.867	0.726122	0.0197162
A0A024R136		RACGAP1	Rac GTPase activating protein 1, isoform CRA_a OS=Homo sapiens GN=RACGAP1 PE=4 SV=1	32.5949	13	21	11	632	70.982	8.88	89.6	80.3	82.5	101	124.2	122.4	84.1333	115.867	0.726122	0.016327
O60337		MARCH6	E3 ubiquitin-protein ligase MARCH6 OS=Homo sapiens GN=MARCH6 PE=1 SV=2	1.31868	1	1	1	910	102.478	6.28	82.2	79.6	90.5	96.5	124.4	126.8	84.1	115.9	0.725626	0.0362964
O15260		SURF4	Surfeit locus protein 4 OS=Homo sapiens GN=SURF4 PE=1 SV=3	27.5093	6	22	6	269	30.374	7.78	83.7	85.3	83.3	102.2	122.1	123.4	84.1	115.9	0.725626	0.00990259
B4DZB1			cDNA FLJ59645, highly similar to 116 kDa U5 small nuclear ribonucleoprotein component OS=Homo sapiens PE=2 SV=1	58.9382	45	114	1	923	103.756	5.38	76.8	96.4	79.1	112.2	116.4	119.1	84.1	115.9	0.725626	0.00810321
Q7Z7K0		CMC1	COX assembly mitochondrial protein homolog OS=Homo sapiens GN=CMC1 PE=1 SV=1	48.1132	5	7	5	106	12.481	8.63	78.3	94.5	79.2	106	133.1	108.9	84	116	0.724138	0.0336216
A0A024R0C0		CEPT1	Choline/ethanolamine phosphotransferase 1, isoform CRA_b OS=Homo sapiens GN=CEPT1 PE=3 SV=1	4.80769	2	3	2	416	46.523	8.21	80.5	89.9	81.6	103.6	131.8	112.7	84	116.033	0.72393	0.0221495
Q9NWS8		RMND1	Required for meiotic nuclear division protein 1 homolog OS=Homo sapiens GN=RMND1 PE=1 SV=2	10.245	4	5	4	449	51.571	8.69	85.1	87.6	79.2	120.8	114.4	112.8	83.9667	116	0.723851	0.000781714
Q13310		PABPC4	Polyadenylate-binding protein 4 OS=Homo sapiens GN=PABPC4 PE=1 SV=1	50.9317	29	71	1	644	70.738	9.26	88.4	82.2	81.2	101	127.8	119.3	83.9333	116.033	0.723355	0.017476
D9HTE9		SLC25A1	Plasma membrane citrate carrier OS=Homo sapiens GN=SLC25A1 PE=2 SV=1	34.5912	11	27	11	318	35.03	9.99	83.3	86.1	82.4	114.9	120.1	113.3	83.9333	116.1	0.72294	0.000161034
A0A024R9H2		HRSP12	Heat-responsive protein 12, isoform CRA_a OS=Homo sapiens GN=HRSP12 PE=4 SV=1	58.3942	6	9	6	137	14.485	8.68	83.4	88.7	79.5	102.6	125.1	120.6	83.8667	116.1	0.722366	0.0119499
Q8NE86		MCU	Calcium uniporter protein, mitochondrial OS=Homo sapiens GN=MCU PE=1 SV=1	25.9259	8	13	8	351	39.842	8.65	85.6	86.8	79.2	120.2	121.7	106.5	83.8667	116.133	0.722158	0.00389035
Q9UDW1		UQCR10	Cytochrome b-c1 complex subunit 9 OS=Homo sapiens GN=UQCR10 PE=1 SV=3	39.6825	2	5	2	63	7.304	9.47	87	88.7	75.9	111	122.2	115.2	83.8667	116.133	0.722158	0.00337048
Q9UBV8		PEF1	Peflin OS=Homo sapiens GN=PEF1 PE=1 SV=1	4.57746	1	2	1	284	30.361	6.54	82.1	82.7	86.7	112.9	117.6	118	83.8333	116.167	0.721664	0.000120974
Q9UNA4		POLI	DNA polymerase iota OS=Homo sapiens GN=POLI PE=1 SV=3	1.89189	1	1	1	740	82.954	6.07	72.3	91.2	88	105	134.9	108.7	83.8333	116.2	0.721457	0.0431436
A0A1S5UZH5		TXN	Mitochondrial thioredoxin OS=Homo sapiens GN=TXN PE=2 SV=1	33.1707	4	10	4	205	22.781	8.47	80.7	90.8	79.8	131.7	118.3	98.8	83.7667	116.267	0.72047	0.0331537
P49789		FHIT	Bis(5'-adenosyl)-triphosphatase OS=Homo sapiens GN=FHIT PE=1 SV=3	12.2449	1	2	1	147	16.848	7.08	85.3	81.8	84	109.2	114.5	125.1	83.7	116.267	0.719897	0.00243416
Q59GY0			Apolipoprotein B mRNA editing enzyme, catalytic polypeptide-like 3C variant (Fragment) OS=Homo sapiens PE=2 SV=1	42.4528	6	10	5	212	25.179	8.57	82.8	81.6	86.6	109.4	122.7	116.9	83.6667	116.333	0.719198	0.00138778
P04066		FUCA1	Tissue alpha-L-fucosidase OS=Homo sapiens GN=FUCA1 PE=1 SV=4	12.4464	4	7	4	466	53.655	6.84	82.3	91.1	77.3	102.4	122	124.8	83.5667	116.4	0.717927	0.0155549
E3Q1J2		HLA-B	MHC class I antigen (Fragment) OS=Homo sapiens GN=HLA-B PE=3 SV=1	57.5092	13	21	2	273	31.559	5.97	78.1	89.4	83.1	120.5	116.4	112.5	83.5333	116.467	0.71723	0.00118973
Q53GL6		RALY	RNA binding protein (Autoantigenic, hnRNP-associated with lethal yellow) long isoform variant (Fragment) OS=Homo sapiens GN=RALY PE=1 SV=1	67.4267	18	49	2	307	32.531	9.17	86.3	92.6	71.5	109.9	116.3	123.4	83.4667	116.533	0.716247	0.010931
O43692		PI15	Peptidase inhibitor 15 OS=Homo sapiens GN=PI15 PE=1 SV=1	7.36434	1	1	1	258	29.046	8.03	86.2	94.9	69.2	107.8	121.5	120.3	83.4333	116.533	0.715961	0.0192145
Q86X69			PON2 protein OS=Homo sapiens PE=2 SV=1	50.2283	6	18	2	219	24.596	6.21	87.8	82.8	79.5	107.2	131.4	111.3	83.3667	116.633	0.714776	0.0133283
Q8N6L1		KRTCAP2	Keratinocyte-associated protein 2 OS=Homo sapiens GN=KRTCAP2 PE=1 SV=2	12.5	1	2	1	136	14.669	9.61	85.2	88.4	76.2	98.9	128.6	122.7	83.2667	116.733	0.713307	0.0267749
Q69YL0		NCBP2-AS2	Uncharacterized protein NCBP2-AS2 OS=Homo sapiens GN=NCBP2-AS2 PE=1 SV=1	8.08081	1	1	1	99	10.884	12	79.2	92.2	78.4	109.8	104.3	136.1	83.2667	116.733	0.713307	0.0361021
C0M122		HLA-Cw	MHC class I antigen (Fragment) OS=Homo sapiens GN=HLA-Cw PE=3 SV=1	52.4862	8	11	1	181	20.873	6.09	84.2	85.7	79.9	120.4	123.4	106.4	83.2667	116.733	0.713307	0.00373594
Q86WC4		OSTM1	Osteopetrosis-associated transmembrane protein 1 OS=Homo sapiens GN=OSTM1 PE=1 SV=1	4.49102	1	1	1	334	37.233	6.01	83.9	100.4	65.5	110.4	119.4	120.5	83.2667	116.767	0.713103	0.0339299
Q13825		AUH	Methylglutaconyl-CoA hydratase, mitochondrial OS=Homo sapiens GN=AUH PE=1 SV=1	15.0442	4	7	4	339	35.586	9.48	81.5	87.3	80.9	114.4	126.7	109.3	83.2333	116.8	0.712614	0.00377778
Q8IXM3		MRPL41	39S ribosomal protein L41, mitochondrial OS=Homo sapiens GN=MRPL41 PE=1 SV=1	64.9635	7	16	7	137	15.373	9.57	88.2	83.7	77.7	127	118	105.3	83.2	116.767	0.712532	0.00863833
Q12974		PTP4A2	Protein tyrosine phosphatase type IVA 2 OS=Homo sapiens GN=PTP4A2 PE=1 SV=1	22.1557	3	3	3	167	19.115	8.37	84.3	82.8	82.5	101.3	123.5	125.5	83.2	116.767	0.712532	0.0124734
B4DDB6		HNRPA3	Heterogeneous nuclear ribonucleoprotein A3, isoform CRA_a OS=Homo sapiens GN=HNRPA3 PE=2 SV=1	54.7753	25	104	1	356	37.006	8.31	76.2	86.9	86.5	105.8	124.6	120	83.2	116.8	0.712329	0.00723342
E9PQ56		PUF60	Poly(U)-binding-splicing factor PUF60 (Fragment) OS=Homo sapiens GN=PUF60 PE=1 SV=8	70.4969	15	40	1	322	34.407	8.59	80.6	86.2	82.5	104.3	126.1	120.3	83.1	116.9	0.710864	0.00734573
P41247		PNPLA4	Patatin-like phospholipase domain-containing protein 4 OS=Homo sapiens GN=PNPLA4 PE=2 SV=3	6.71937	1	1	1	253	27.963	9.11	78.2	89.5	81.6	128.7	110.9	111.2	83.1	116.933	0.710661	0.00750105
Q6P587		FAHD1	Acylpyruvase FAHD1, mitochondrial OS=Homo sapiens GN=FAHD1 PE=1 SV=2	23.2143	4	12	4	224	24.827	7.39	86.7	83.4	79	113.5	126.2	111.2	83.0333	116.967	0.709889	0.00278753
Q9BTT4		MED10	Mediator of RNA polymerase II transcription subunit 10 OS=Homo sapiens GN=MED10 PE=1 SV=1	44.4444	5	5	5	135	15.678	6.19	86	83.8	79.1	97	127.8	126.3	82.9667	117.033	0.708915	0.0291076
Q8IXM2		BAP18	Chromatin complexes subunit BAP18 OS=Homo sapiens GN=BAP18 PE=1 SV=1	46.5116	5	7	5	172	17.889	7.33	81.9	86.7	80.1	106.1	125	120.2	82.9	117.1	0.707942	0.00469356
F4NBW3		HLA-B	MHC class I antigen (Fragment) OS=Homo sapiens GN=HLA-B PE=3 SV=1	32.7381	8	13	1	336	38.023	6.86	75.5	96.2	77	134.1	114.5	102.7	82.9	117.1	0.707942	0.0391718
O75394		MRPL33	39S ribosomal protein L33, mitochondrial OS=Homo sapiens GN=MRPL33 PE=1 SV=1	38.4615	2	8	2	65	7.614	10.8	83.8	88.8	76.1	129.3	114.6	107.5	82.9	117.133	0.70774	0.00986417
A0A024R5C4		RTN3	Reticulon OS=Homo sapiens GN=RTN3 PE=4 SV=1	26.2712	3	5	3	236	25.593	8.51	87.7	81.7	79.2	105.2	131.8	114.5	82.8667	117.167	0.707255	0.0138375
L0R6Q1		SLC35A4	SLC35A4 upstream open reading frame protein OS=Homo sapiens GN=SLC35A4 PE=3 SV=1	63.1068	6	14	6	103	11.126	8.1	86.5	83.5	78.3	116	124.6	111	82.7667	117.2	0.7062	0.00175702
Q9P032		NDUFAF4	NADH dehydrogenase [ubiquinone] 1 alpha subcomplex assembly factor 4 OS=Homo sapiens GN=NDUFAF4 PE=1 SV=1	22.8571	3	5	3	175	20.254	8.82	79.6	88.5	80.2	119.1	120	112.6	82.7667	117.233	0.705999	0.000738304
A8MT69		CENPX	Centromere protein X OS=Homo sapiens GN=CENPX PE=1 SV=1	11.1111	1	1	1	81	8.954	5.9	75.4	92.6	80.3	111.5	115.2	125	82.7667	117.233	0.705999	0.00611418
Q96AQ6		PBXIP1	Pre-B-cell leukemia transcription factor-interacting protein 1 OS=Homo sapiens GN=PBXIP1 PE=1 SV=1	20.5198	8	12	8	731	80.594	5.33	80.7	89.9	77.5	103.8	117.4	130.6	82.7	117.267	0.70523	0.0157694
P35659		DEK	Protein DEK OS=Homo sapiens GN=DEK PE=1 SV=1	24.5333	11	29	11	375	42.648	8.56	82.7	84	81.4	107	133.1	111.9	82.7	117.333	0.70483	0.0125926
Q9BQT8		SLC25A21	Mitochondrial 2-oxodicarboxylate carrier OS=Homo sapiens GN=SLC25A21 PE=1 SV=1	20.4013	4	5	4	299	33.282	9.51	76.5	91.5	80	104.6	128.4	119	82.6667	117.333	0.704545	0.013797
Q9Y2Z9		COQ6	Ubiquinone biosynthesis monooxygenase COQ6, mitochondrial OS=Homo sapiens GN=COQ6 PE=1 SV=2	2.13675	2	2	2	468	50.838	7.3	85.8	87.8	74.3	109.1	128.2	114.8	82.6333	117.367	0.704061	0.00790249
Q9BQ04		RBM4B	RNA-binding protein 4B OS=Homo sapiens GN=RBM4B PE=1 SV=1	35.0975	13	21	1	359	40.124	6.74	76.3	87.5	84	108.2	125.6	118.4	82.6	117.4	0.703578	0.00448923
Q13641		TPBG	Trophoblast glycoprotein OS=Homo sapiens GN=TPBG PE=1 SV=1	5.95238	2	2	2	420	46.003	6.83	84.1	87.1	76.4	105.3	126.6	120.5	82.5333	117.467	0.702611	0.00788741
Q07021		C1QBP	Complement component 1 Q subcomponent-binding protein, mitochondrial OS=Homo sapiens GN=C1QBP PE=1 SV=1	42.9078	10	81	10	282	31.343	4.84	80	87.6	79.8	116.7	124.5	111.4	82.4667	117.533	0.701645	0.00157644
A0A0J9YWM6		ALDH7A1	Alpha-aminoadipic semialdehyde dehydrogenase (Fragment) OS=Homo sapiens GN=ALDH7A1 PE=1 SV=1	82.9268	3	12	1	41	4.64	4.72	78.4	86.4	82.3	128.3	118.7	105.9	82.3667	117.633	0.700198	0.00688288
O43861		ATP9B	Probable phospholipid-transporting ATPase IIB OS=Homo sapiens GN=ATP9B PE=2 SV=4	1.6565	2	2	1	1147	129.22	7.61	90	69.1	88	131.9	109.9	111.1	82.3667	117.633	0.700198	0.0225196
Q8N5G0		SMIM20	Small integral membrane protein 20 OS=Homo sapiens GN=SMIM20 PE=1 SV=3	32.8358	2	5	2	67	7.697	9.86	81.2	86	79.8	119.7	114.5	118.8	82.3333	117.667	0.699717	0.000138644
B2R995			Malic enzyme OS=Homo sapiens PE=2 SV=1	8.9404	3	3	2	604	67.072	7.84	86.2	84.4	76.4	104.2	124.2	124.7	82.3333	117.7	0.699519	0.00875057
P15954		COX7C	Cytochrome c oxidase subunit 7C, mitochondrial OS=Homo sapiens GN=COX7C PE=1 SV=1	28.5714	2	10	2	63	7.241	10.27	81.8	79.7	85.5	108.8	129.9	114.4	82.3333	117.7	0.699519	0.00564537
G5D8J3		COX2	Cytochrome c oxidase subunit 2 OS=Homo sapiens GN=COX2 PE=3 SV=1	30.837	8	48	2	227	25.543	4.89	72.4	79.6	94.8	109	130.4	113.8	82.2667	117.733	0.698754	0.018572
O75431		MTX2	Metaxin-2 OS=Homo sapiens GN=MTX2 PE=1 SV=1	44.1065	9	14	9	263	29.744	6.29	82.5	86.2	78	108.5	126.5	118.3	82.2333	117.767	0.698273	0.00341206
Q13454		TUSC3	Tumor suppressor candidate 3 OS=Homo sapiens GN=TUSC3 PE=1 SV=1	7.75862	3	5	3	348	39.65	9.91	83.6	83	80.1	102.2	123.6	127.5	82.2333	117.767	0.698273	0.0110218
P62760		VSNL1	Visinin-like protein 1 OS=Homo sapiens GN=VSNL1 PE=1 SV=2	8.90052	2	2	1	191	22.128	5.15	83	88	75.7	98.3	129.8	125.2	82.2333	117.767	0.698273	0.0272901
Q9BRX8		FAM213A	Redox-regulatory protein FAM213A OS=Homo sapiens GN=FAM213A PE=1 SV=3	42.7948	10	19	10	229	25.747	8.84	81.9	85.8	78.8	106.5	126.7	120.3	82.1667	117.833	0.697313	0.00478462
Q5TEU4		NDUFAF5	Arginine-hydroxylase NDUFAF5, mitochondrial OS=Homo sapiens GN=NDUFAF5 PE=1 SV=1	3.47826	1	2	1	345	38.894	6.57	88.3	85.7	72.5	103.6	127.8	122.2	82.1667	117.867	0.697115	0.0153831
S4R2Z7		MRPL42	39S ribosomal protein L42, mitochondrial OS=Homo sapiens GN=MRPL42 PE=1 SV=1	9.67742	1	2	1	155	17.884	8.19	86	81.8	78.4	113.1	119	121.6	82.0667	117.9	0.69607	0.000427717
F4ZW62			NF45 OS=Homo sapiens PE=1 SV=1	61.7949	21	120	21	390	43.035	5.26	84.5	80.4	81.3	111.7	127.6	114.6	82.0667	117.967	0.695677	0.00206062
Q8N2U0		TMEM256	Transmembrane protein 256 OS=Homo sapiens GN=TMEM256 PE=3 SV=1	31.8584	2	4	2	113	11.734	8.94	93	76.3	76.8	108.7	134.1	111	82.0333	117.933	0.695591	0.0214565
P20073		ANXA7	Annexin A7 OS=Homo sapiens GN=ANXA7 PE=1 SV=3	31.3525	16	31	16	488	52.706	5.68	79.2	80.6	86	116.2	125.3	112.7	81.9333	118.067	0.693958	0.00108734
A0A024R745		NDUFA5	NADH dehydrogenase (Ubiquinone) 1 alpha subcomplex, 5, 13kDa, isoform CRA_b OS=Homo sapiens GN=NDUFA5 PE=4 SV=1	67.2414	7	14	7	116	13.45	5.99	80.2	88.1	77.4	128.4	122.6	103.4	81.9	118.133	0.693284	0.0115503
Q0P5W4		RCE1	RCE1 protein (Fragment) OS=Homo sapiens GN=RCE1 PE=2 SV=1	8.20669	2	2	2	329	35.327	9.19	88.6	76.9	80	95.7	130.5	128.3	81.8333	118.167	0.692525	0.0368046
J3KRZ5		SHMT1	Serine hydroxymethyltransferase, cytosolic (Fragment) OS=Homo sapiens GN=SHMT1 PE=1 SV=1	42.515	6	11	1	167	18.564	6.38	79.2	90.2	76	102	115.1	137.5	81.8	118.2	0.692047	0.031559
A8K0D4			cDNA FLJ78693, highly similar to Homo sapiens TAF6-like RNA polymerase II, p300/CBP-associated factor (PCAF)-associated factor, 65kDa (TAF6L), mRNA OS=Homo sapiens PE=2 SV=1	3.37621	2	2	2	622	67.7	9.06	77.8	87.3	80.2	101	115.1	138.7	81.7667	118.267	0.691375	0.0325077
A0A0A0MQS6		CDH23	Cadherin-23 OS=Homo sapiens GN=CDH23 PE=1 SV=2	0.654957	1	3	1	3359	369.651	4.67	84.6	78.4	82.3	115.2	120.7	118.9	81.7667	118.267	0.691375	0.00011411
A0A024RBN6		COX6A1	Cytochrome c oxidase subunit 6A, mitochondrial OS=Homo sapiens GN=COX6A1 PE=3 SV=1	30.9211	2	8	1	152	16.776	10.83	80	88	77.1	130.3	115.4	109.2	81.7	118.3	0.690617	0.00658356
O75182		SIN3B	Paired amphipathic helix protein Sin3b OS=Homo sapiens GN=SIN3B PE=1 SV=2	1.37694	1	1	1	1162	132.983	6.93	81.9	82.4	80.7	114	127.1	113.9	81.6667	118.333	0.690141	0.00114536
Q1HDL3		HBEBP2BPA	HBeAg-binding protein 2 binding protein A OS=Homo sapiens GN=HBEBP2BPA PE=1 SV=1	11.3712	3	5	3	299	31.985	7.62	71.6	93.1	80	107	124.4	123.9	81.5667	118.433	0.688714	0.0121595
B4E2A6			cDNA FLJ55508, highly similar to Sad1/unc-84-like protein 2 OS=Homo sapiens PE=2 SV=1	34.3085	15	19	1	752	83.913	6.84	89.2	80.7	74.7	113.4	115.5	126.5	81.5333	118.467	0.688239	0.00321447
V9HWE0		HEL-S-7	Annexin OS=Homo sapiens GN=HEL-S-7 PE=2 SV=1	80	28	123	27	320	35.914	5.05	76.9	84.3	83.3	112.9	132	110.5	81.5	118.467	0.687957	0.00677186
P30536		TSPO	Translocator protein OS=Homo sapiens GN=TSPO PE=1 SV=3	9.46746	2	4	2	169	18.816	9.36	79.1	89.2	75.9	121.3	125.4	109	81.4	118.567	0.686534	0.00425544
P58557		YBEY	Putative ribonuclease OS=Homo sapiens GN=YBEY PE=1 SV=2	16.1677	2	3	2	167	19.286	7.55	74.3	87.4	82.5	97	133.5	125.4	81.4	118.633	0.686148	0.0335277
Q969Z3		MARC2	Mitochondrial amidoxime reducing component 2 OS=Homo sapiens GN=MARC2 PE=1 SV=1	6.56716	2	2	1	335	37.999	9.16	77.8	84.5	81.7	117.5	137.6	101	81.3333	118.7	0.685201	0.0255154
P02686		MBP	Myelin basic protein OS=Homo sapiens GN=MBP PE=1 SV=3	9.86842	1	1	1	304	33.097	9.79	71	93.8	78.8	98.9	118.4	139.1	81.2	118.8	0.683502	0.0484808
Q15029		EFTUD2	116 kDa U5 small nuclear ribonucleoprotein component OS=Homo sapiens GN=EFTUD2 PE=1 SV=1	58.642	46	116	2	972	109.366	5	87.9	74.6	81	111	129	116.6	81.1667	118.867	0.682838	0.00454391
Q96D05		C10orf35	Uncharacterized protein C10orf35 OS=Homo sapiens GN=C10orf35 PE=1 SV=1	22.314	2	2	2	121	13.23	11.58	80.3	87.2	75.8	120.6	115.1	120.9	81.1	118.867	0.682277	0.000583646
H0Y368		DPM1	Dolichol-phosphate mannosyltransferase subunit 1 (Fragment) OS=Homo sapiens GN=DPM1 PE=1 SV=1	32.8814	8	14	8	295	33.307	9.14	80.6	87.5	75.1	104.2	133.4	119.1	81.0667	118.9	0.681805	0.014498
P36956		SREBF1	Sterol regulatory element-binding protein 1 OS=Homo sapiens GN=SREBF1 PE=1 SV=2	4.62075	3	3	3	1147	121.599	8.13	91.2	78	73.9	110.8	122.2	123.8	81.0333	118.933	0.681334	0.00463977
P37235		HPCAL1	Hippocalcin-like protein 1 OS=Homo sapiens GN=HPCAL1 PE=1 SV=3	64.2487	12	24	12	193	22.299	5.35	80.4	84.3	78.3	95.4	134.8	126.9	81	119.033	0.680482	0.0352832
O95639		CPSF4	Cleavage and polyadenylation specificity factor subunit 4 OS=Homo sapiens GN=CPSF4 PE=1 SV=1	26.7658	5	8	5	269	30.235	8.31	81.3	82.7	78.6	100.5	133.3	123.6	80.8667	119.133	0.678791	0.0174857
Q14442		PIGH	Phosphatidylinositol N-acetylglucosaminyltransferase subunit H OS=Homo sapiens GN=PIGH PE=1 SV=1	4.78723	1	1	1	188	21.067	6.73	80	82.6	80	104.2	138.3	114.9	80.8667	119.133	0.678791	0.0193269
Q9BSM1		PCGF1	Polycomb group RING finger protein 1 OS=Homo sapiens GN=PCGF1 PE=1 SV=2	13.8996	2	2	2	259	30.327	8.91	79	81.4	82	114.6	112.2	130.8	80.8	119.2	0.677852	0.0028991
P26368		U2AF2	Splicing factor U2AF 65 kDa subunit OS=Homo sapiens GN=U2AF2 PE=1 SV=4	49.2632	15	50	15	475	53.467	9.09	81.1	81.4	79.3	103	132.5	122.7	80.6	119.4	0.675042	0.0111581
P52815		MRPL12	39S ribosomal protein L12, mitochondrial OS=Homo sapiens GN=MRPL12 PE=1 SV=2	39.899	6	16	6	198	21.335	8.87	81.8	79.9	79.9	120.6	129.1	108.7	80.5333	119.467	0.674107	0.00281942
Q6P9B9		INTS5	Integrator complex subunit 5 OS=Homo sapiens GN=INTS5 PE=1 SV=1	2.06084	2	2	2	1019	107.927	7.05	92.8	70.8	77.6	115.6	131.7	111.4	80.4	119.567	0.672428	0.012029
A0A140TA86		C19orf70	MICOS complex subunit MIC13 OS=Homo sapiens GN=C19orf70 PE=1 SV=1	57.8571	4	8	4	140	15.426	9.03	76.1	83.4	81.1	104.2	132.3	122.9	80.2	119.8	0.669449	0.00973616
Q13948		CUX1	Protein CASP OS=Homo sapiens GN=CUX1 PE=1 SV=2	22.2714	13	18	2	678	77.408	5.44	86.1	75.4	77.4	114.9	124.8	121.4	79.6333	120.367	0.66159	0.000746688
Q5JPH6		EARS2	Probable glutamate--tRNA ligase, mitochondrial OS=Homo sapiens GN=EARS2 PE=1 SV=2	23.327	9	11	9	523	58.652	8.76	78.6	84	76.3	112.2	121.8	127.1	79.6333	120.367	0.66159	0.00116319
P62805		HIST1H4A	Histone H4 OS=Homo sapiens GN=HIST1H4A PE=1 SV=2	54.3689	11	218	11	103	11.36	11.36	77.8	83.7	77	136.1	127.3	98.1	79.5	120.5	0.659751	0.0246469
O43808		SLC25A17	Peroxisomal membrane protein PMP34 OS=Homo sapiens GN=SLC25A17 PE=1 SV=1	7.16612	2	2	2	307	34.545	10.08	77.6	82.3	78.4	102	133.3	126.5	79.4333	120.6	0.658651	0.012833
Q8TBF4		ZCRB1	Zinc finger CCHC-type and RNA-binding motif-containing protein 1 OS=Homo sapiens GN=ZCRB1 PE=1 SV=2	8.29493	1	1	1	217	24.576	8.53	85.3	80.3	72.6	112.9	122.9	126	79.4	120.6	0.658375	0.00159576
Q6FII1		LOC51064	Glutathione S-transferase kappa OS=Homo sapiens GN=LOC51064 PE=2 SV=1	43.3628	8	23	8	226	25.48	8.41	77	85.3	75.7	115.2	133.9	112.9	79.3333	120.667	0.657459	0.00479198
B9VP24		HSPD1	60 kDa chaperonin (Fragment) OS=Homo sapiens GN=HSPD1 PE=4 SV=1	15.1351	3	9	1	185	19.766	7.93	82.9	80.7	74.4	131.4	123.1	107.6	79.3333	120.7	0.657277	0.00508603
Q8WV92		MITD1	MIT domain-containing protein 1 OS=Homo sapiens GN=MITD1 PE=1 SV=1	16.4659	3	4	3	249	29.296	8	76.5	80.5	80.5	107.4	128.2	126.8	79.1667	120.8	0.655353	0.00368991
Q96AB3		ISOC2	Isochorismatase domain-containing protein 2 OS=Homo sapiens GN=ISOC2 PE=1 SV=1	52.1951	6	13	6	205	22.323	7.77	74.9	83.1	78.7	125.3	124.5	113.5	78.9	121.1	0.651528	0.000710525
Q8N5M9		JAGN1	Protein jagunal homolog 1 OS=Homo sapiens GN=JAGN1 PE=1 SV=1	13.6612	3	5	3	183	21.111	9.73	75.1	89.7	71.8	112.8	130.3	120.3	78.8667	121.133	0.651073	0.00483067
A8K7J6			cDNA FLJ76418, highly similar to Homo sapiens mitochondrial ribosomal protein L52 (MRPL52), transcript variant 1, mRNA OS=Homo sapiens PE=1 SV=1	42.2764	3	3	3	123	13.669	10.26	76.3	83.8	76.2	108.6	128.3	126.9	78.7667	121.267	0.649533	0.00339067
Q71DI3		HIST2H3A	Histone H3.2 OS=Homo sapiens GN=HIST2H3A PE=1 SV=3	55.8824	8	54	1	136	15.379	11.27	62.8	103	70	118.1	111.3	134.7	78.6	121.367	0.647624	0.0394299
Q8N697		SLC15A4	Solute carrier family 15 member 4 OS=Homo sapiens GN=SLC15A4 PE=1 SV=1	4.85269	2	3	2	577	61.993	9	79.8	81	74.5	94.9	134.8	135	78.4333	121.567	0.645188	0.0329232
Q92570		NR4A3	Nuclear receptor subfamily 4 group A member 3 OS=Homo sapiens GN=NR4A3 PE=1 SV=3	1.27796	1	1	1	626	68.186	7.81	80.5	81.9	72.6	98.9	148.2	117.9	78.3333	121.667	0.643836	0.0415971
A0A0S2Z377		ANXA6	Annexin (Fragment) OS=Homo sapiens GN=ANXA6 PE=2 SV=1	73.0135	51	142	2	667	75.229	5.67	72.3	79	83.6	93.7	146.1	125.3	78.3	121.7	0.643385	0.0495563
Q86WW8		COA5	Cytochrome c oxidase assembly factor 5 OS=Homo sapiens GN=COA5 PE=1 SV=1	44.5946	2	2	2	74	8.37	8.68	82.7	79.1	72.2	129	122.9	114	78	121.967	0.639519	0.00118194
Q9UGM6		WARS2	Tryptophan--tRNA ligase, mitochondrial OS=Homo sapiens GN=WARS2 PE=1 SV=1	12.2222	2	2	2	360	40.121	9.28	92.3	75.1	66.6	109.9	132.8	123.2	78	121.967	0.639519	0.0119681
Q9ULF5		SLC39A10	Zinc transporter ZIP10 OS=Homo sapiens GN=SLC39A10 PE=1 SV=2	3.00842	3	3	3	831	94.073	6.76	86.9	76.5	70.4	111.6	128.1	126.6	77.9333	122.1	0.638275	0.00346739
A0A1U9X845			NRM OS=Homo sapiens PE=4 SV=1	10.3053	2	2	2	262	29.36	8.63	77.2	79.5	77	104.1	126.8	135.5	77.9	122.133	0.637828	0.00924943
Q96AG4		LRRC59	Leucine-rich repeat-containing protein 59 OS=Homo sapiens GN=LRRC59 PE=1 SV=1	52.443	15	50	15	307	34.909	9.57	79.3	78.8	75.5	114.8	134.3	117.4	77.8667	122.167	0.637381	0.00206437
L0R5C5		RAG2	Alternative protein RAG2 OS=Homo sapiens GN=RAG2 PE=4 SV=1	16.6667	1	2	1	90	10.248	11.39	67	78.8	87.6	117.9	132.3	116.4	77.8	122.2	0.636661	0.00477001
Q6ZMG9		CERS6	Ceramide synthase 6 OS=Homo sapiens GN=CERS6 PE=1 SV=1	1.82292	1	2	1	384	44.861	7.65	77.8	77.8	77.7	99.8	133.1	133.8	77.7667	122.233	0.636215	0.0166264
Q9NRP4		SDHAF3	Succinate dehydrogenase assembly factor 3, mitochondrial OS=Homo sapiens GN=SDHAF3 PE=1 SV=1	28.8	2	2	2	125	14.642	9.07	80.2	80.4	72.7	122.3	122.6	121.9	77.7667	122.267	0.636041	6.25295e-05
Q9BW72		HIGD2A	HIG1 domain family member 2A, mitochondrial OS=Homo sapiens GN=HIGD2A PE=1 SV=1	27.3585	1	3	1	106	11.521	10.2	79	82.2	72	118	132.7	116.1	77.7333	122.267	0.635769	0.0018131
B2R4Q7			Mitochondrial pyruvate carrier OS=Homo sapiens PE=2 SV=1	30.7087	3	6	3	127	14.296	10.43	79.3	74	79.8	126.5	132.2	108.2	77.7	122.3	0.635323	0.00395997
B2RBF5			cDNA, FLJ95483, highly similar to Homo sapiens chitobiase, di-N-acetyl- (CTBS), mRNA OS=Homo sapiens PE=2 SV=1	3.8961	1	1	1	385	43.766	6.64	78.2	80.8	73	107	151.2	109.8	77.3333	122.667	0.630435	0.0351036
Q9Y221		NIP7	60S ribosome subunit biogenesis protein NIP7 homolog OS=Homo sapiens GN=NIP7 PE=1 SV=1	76.1111	9	23	9	180	20.449	8.51	80.6	75	76.1	104.6	136	127.7	77.2333	122.767	0.629107	0.00885034
Q5BJF2		TMEM97	Transmembrane protein 97 OS=Homo sapiens GN=TMEM97 PE=1 SV=1	14.2045	2	3	2	176	20.834	9.38	68.8	97.7	65.1	103.7	121	143.7	77.2	122.8	0.628664	0.0423324
P56282		POLE2	DNA polymerase epsilon subunit 2 OS=Homo sapiens GN=POLE2 PE=1 SV=2	6.07211	2	2	2	527	59.499	6.35	78	76.6	77	98.8	138.8	130.8	77.2	122.8	0.628664	0.0203082
P24390		KDELR1	ER lumen protein-retaining receptor 1 OS=Homo sapiens GN=KDELR1 PE=1 SV=1	8.96226	1	1	1	212	24.526	8.62	81	77.5	72.7	116.1	133.5	119.3	77.0667	122.967	0.626728	0.00143766
Q96MG7		NSMCE3	Non-structural maintenance of chromosomes element 3 homolog OS=Homo sapiens GN=NSMCE3 PE=1 SV=1	3.61842	1	1	1	304	34.287	9.28	79.2	76.2	75.5	108.1	151.1	109.9	76.9667	123.033	0.625576	0.0307963
F5H872		MED21	Mediator of RNA polymerase II transcription subunit 21 OS=Homo sapiens GN=MED21 PE=1 SV=1	27.044	2	3	2	159	17.268	4.53	75.6	82.9	72.1	97.6	152.2	119.7	76.8667	123.167	0.624087	0.0457975
A0A024R5U4		C15orf48	Chromosome 15 open reading frame 48, isoform CRA_a OS=Homo sapiens GN=C15orf48 PE=4 SV=1	22.8916	1	4	1	83	9.611	9.47	77.6	80.5	72.4	125.6	127.8	116	76.8333	123.133	0.623985	0.000432933
P55789		GFER	FAD-linked sulfhydryl oxidase ALR OS=Homo sapiens GN=GFER PE=1 SV=2	5.85366	1	1	1	205	23.434	7.62	75	83.6	71.8	138.2	121.3	110.2	76.8	123.233	0.623208	0.00636308
P24311		COX7B	Cytochrome c oxidase subunit 7B, mitochondrial OS=Homo sapiens GN=COX7B PE=1 SV=2	8.75	1	2	1	80	9.155	10.27	76.4	81.4	72.2	133.3	121.2	115.7	76.6667	123.4	0.621286	0.00132164
Q8NI60		COQ8A	Atypical kinase COQ8A, mitochondrial OS=Homo sapiens GN=COQ8A PE=1 SV=1	2.47295	1	1	1	647	71.904	6.99	81	85.8	63.1	100.3	131.5	138.3	76.6333	123.367	0.621183	0.0262981
O14561		NDUFAB1	Acyl carrier protein, mitochondrial OS=Homo sapiens GN=NDUFAB1 PE=1 SV=3	23.7179	5	20	5	156	17.406	4.93	75.6	83.7	70.2	127.5	133.3	109.8	76.5	123.533	0.619266	0.00434429
Q4U2R6		MRPL51	39S ribosomal protein L51, mitochondrial OS=Homo sapiens GN=MRPL51 PE=1 SV=1	13.2812	1	2	1	128	15.085	11.27	73.5	81.3	74.5	129.5	127.6	113.6	76.4333	123.567	0.618559	0.00107625
Q9Y4F1		FARP1	FERM, RhoGEF and pleckstrin domain-containing protein 1 OS=Homo sapiens GN=FARP1 PE=1 SV=1	1.24402	1	1	1	1045	118.559	8.15	77.5	80.1	70.5	107.7	139.1	125.1	76.0333	123.967	0.613337	0.00731791
Q9BUR5		APOO	MICOS complex subunit MIC26 OS=Homo sapiens GN=APOO PE=1 SV=1	31.8182	5	7	5	198	22.271	9.13	78.5	78	71.5	101.1	147.5	123.4	76	124	0.612903	0.0241656
A0A024R6U7		GPR56	G protein-coupled receptor 56 isoform 1 OS=Homo sapiens GN=GPR56 PE=2 SV=1	7.35931	3	3	3	693	77.688	8.48	76.9	78.3	71.7	131.2	125.2	116.7	75.6333	124.367	0.608148	0.000472886
A0A024RBI7		GLTP	Glycolipid transfer protein, isoform CRA_a OS=Homo sapiens GN=GLTP PE=4 SV=1	7.17703	1	1	1	209	23.834	7.39	71.6	81	73.7	143.8	123	106.9	75.4333	124.567	0.605566	0.0112923
B4DRE5			cDNA FLJ55391 OS=Homo sapiens PE=2 SV=1	7.38462	1	1	1	325	35.256	6.84	69.8	88.3	67.9	110.1	133.7	130.1	75.3333	124.633	0.60444	0.00735453
P57088		TMEM33	Transmembrane protein 33 OS=Homo sapiens GN=TMEM33 PE=1 SV=2	42.1053	9	22	9	247	27.96	9.7	76.6	74.8	74.4	95.2	138.9	140.2	75.2667	124.767	0.603259	0.0287343
Q99595		TIMM17A	Mitochondrial import inner membrane translocase subunit Tim17-A OS=Homo sapiens GN=TIMM17A PE=1 SV=1	26.3158	2	2	2	171	18.012	7.87	79.5	63.1	81.2	117.4	131.1	127.7	74.6	125.4	0.594896	0.00200847
A0A024RDJ3		NOLA1	H/ACA ribonucleoprotein complex subunit OS=Homo sapiens GN=NOLA1 PE=3 SV=1	31.3364	6	11	6	217	22.334	10.92	75.7	73.7	74.1	125.1	128.6	122.9	74.5	125.533	0.593468	8.58496e-06
A0A0S2Z3H3		SLC25A4	Solute carrier family 25 member 4 isoform 1 (Fragment) OS=Homo sapiens GN=SLC25A4 PE=2 SV=1	57.7181	18	80	4	298	33.043	9.76	76.2	75.4	71.4	96	148.5	132.6	74.3333	125.7	0.591355	0.0302212
Q9H6E4		CCDC134	Coiled-coil domain-containing protein 134 OS=Homo sapiens GN=CCDC134 PE=1 SV=1	24.4541	4	7	4	229	26.544	8.85	74.1	76	72.4	89.1	147.9	140.5	74.1667	125.833	0.589404	0.0493209
P62304		SNRPE	Small nuclear ribonucleoprotein E OS=Homo sapiens GN=SNRPE PE=1 SV=1	69.5652	5	8	5	92	10.797	9.44	73.6	76.5	70.3	108.2	134.8	136.5	73.4667	126.5	0.580764	0.00474132
O75340		PDCD6	Programmed cell death protein 6 OS=Homo sapiens GN=PDCD6 PE=1 SV=1	49.2147	7	19	7	191	21.855	5.4	71.6	74.7	73.5	110	140.1	130.1	73.2667	126.733	0.578117	0.00385936
K7EKJ9		ILF3	Interleukin enhancer-binding factor 3 (Fragment) OS=Homo sapiens GN=ILF3 PE=1 SV=1	57.4803	13	43	1	254	28.301	5.44	99.6	63.1	56	101.4	143.3	136.7	72.9	127.133	0.573414	0.0444614
D3DP46		SPCS3	Signal peptidase complex subunit 3 homolog (S. cerevisiae), isoform CRA_a OS=Homo sapiens GN=SPCS3 PE=4 SV=1	22.7778	5	10	5	180	20.3	8.97	71.4	76.8	70.3	94.3	151.9	135.3	72.8333	127.167	0.572739	0.0344324
Q9BQQ3		GORASP1	Golgi reassembly-stacking protein 1 OS=Homo sapiens GN=GORASP1 PE=1 SV=3	4.77273	1	3	1	440	46.454	4.5	62.7	70.3	84.8	115.2	139.1	128	72.6	127.433	0.56971	0.0044239
F8W7C6		RPL10	60S ribosomal protein L10 OS=Homo sapiens GN=RPL10 PE=1 SV=2	59.5092	12	35	1	163	18.553	9.95	68.6	82.3	66.2	103.5	133.9	145.5	72.3667	127.633	0.566989	0.0148892
Q02978		SLC25A11	Mitochondrial 2-oxoglutarate/malate carrier protein OS=Homo sapiens GN=SLC25A11 PE=1 SV=3	55.414	15	31	15	314	34.04	9.91	73.7	75	68.2	100.5	149	133.7	72.3	127.733	0.566023	0.0185866
U3KQB3		CSNK1G1	Casein kinase I isoform gamma-1 OS=Homo sapiens GN=CSNK1G1 PE=1 SV=1	7.78947	4	4	1	475	54.447	8.75	72	64.7	77.5	116.9	132.8	136.2	71.4	128.633	0.555066	0.00122442
Q6FG99		RPLP1	RPLP1 protein OS=Homo sapiens GN=RPLP1 PE=2 SV=1	87.7193	4	18	2	114	11.561	4.37	71.5	69.5	72.8	93.2	157.8	135.2	71.2667	128.733	0.553599	0.0386898
Q96BZ9		TBC1D20	TBC1 domain family member 20 OS=Homo sapiens GN=TBC1D20 PE=1 SV=1	1.73697	1	1	1	403	45.826	6.86	75.4	72.1	65	96.7	143.7	147.1	70.8333	129.167	0.548387	0.0243467
Q9H0X4		FAM234A	Protein FAM234A OS=Homo sapiens GN=FAM234A PE=1 SV=1	1.63043	1	1	1	552	59.622	6.28	78.5	70.8	60.6	104.5	147.2	138.4	69.9667	130.033	0.538067	0.0127762
Q9UHA4		LAMTOR3	Ragulator complex protein LAMTOR3 OS=Homo sapiens GN=LAMTOR3 PE=1 SV=1	30.6452	2	4	2	124	13.614	7.34	65.8	80.4	63.1	118.1	141.3	131.2	69.7667	130.2	0.535842	0.00216154
A0A024R816		TTYH3	Protein tweety homolog OS=Homo sapiens GN=TTYH3 PE=3 SV=1	2.67686	1	2	1	523	57.508	5.39	79.7	66.8	62.7	143.1	120.7	127	69.7333	130.267	0.535312	0.00197377
H3BNI4		ATP6V0C	V-type proton ATPase proteolipid subunit OS=Homo sapiens GN=ATP6V0C PE=1 SV=1	8.92857	1	1	1	112	11.595	8.57	67.8	70.1	68.3	87.8	154.4	151.6	68.7333	131.267	0.523616	0.0452935
Q6N075		MFSD5	Molybdate-anion transporter OS=Homo sapiens GN=MFSD5 PE=1 SV=2	3.33333	1	1	1	450	49.732	7.8	67.2	75.9	63	104	132.4	157.6	68.7	131.333	0.523096	0.0171177
O14681		EI24	Etoposide-induced protein 2.4 homolog OS=Homo sapiens GN=EI24 PE=1 SV=4	5.58824	2	2	2	340	38.94	9.72	65.6	74.4	65	115.9	153.2	125.8	68.3333	131.633	0.519119	0.00541694
Q8IVE3		PLEKHH2	Pleckstrin homology domain-containing family H member 2 OS=Homo sapiens GN=PLEKHH2 PE=1 SV=2	0.736772	1	1	1	1493	168.124	7.56	70.1	69.6	63.8	109.6	152.7	134.2	67.8333	132.167	0.513241	0.00704505
V9J4S4		ND5	NADH-ubiquinone oxidoreductase chain 5 OS=Homo sapiens GN=ND5 PE=3 SV=1	5.97015	2	3	1	603	67.021	9.03	62.8	74.9	65.2	94.1	132.7	170.4	67.6333	132.4	0.510826	0.0441265
U6FVB0		CD74-Ntrk1	Tyrosine-protein kinase receptor OS=Homo sapiens GN=CD74-Ntrk1 fusion gene PE=2 SV=1	11.3238	6	10	1	627	70.29	8.13	71.4	66.6	64.8	98.6	149.4	149.1	67.6	132.367	0.510703	0.0189363
H9E7F4		ND1	NADH-ubiquinone oxidoreductase chain 1 OS=Homo sapiens GN=ND1 PE=3 SV=1	6.28931	1	2	1	318	35.591	6.55	63.8	69	67.1	91.9	150	158.3	66.6333	133.4	0.4995	0.0332794
Q96LW7		CARD19	Caspase recruitment domain-containing protein 19 OS=Homo sapiens GN=CARD19 PE=1 SV=1	4.38596	1	1	1	228	25.573	9.2	70.5	65.6	62.5	126.4	147.1	127.9	66.2	133.8	0.494768	0.000664466
P84243		H3F3A	Histone H3.3 OS=Homo sapiens GN=H3F3A PE=1 SV=2	48.5294	6	48	1	136	15.319	11.27	52.9	71.9	72.6	143.4	143.9	115.3	65.8	134.2	0.490313	0.00393781
H9S5Y2		COX2	Cytochrome c oxidase subunit 2 OS=Homo sapiens GN=COX2 PE=3 SV=1	30.837	7	33	1	227	25.545	4.82	67.9	76.5	53	111.9	145.8	145	65.8	134.233	0.490191	0.00642769
Q9BUW7		C9orf16	UPF0184 protein C9orf16 OS=Homo sapiens GN=C9orf16 PE=1 SV=1	14.4578	1	2	1	83	9.048	4.22	66.1	66.3	58.6	117.5	171.7	119.8	63.6667	136.333	0.466993	0.015286
P68431		HIST1H3A	Histone H3.1 OS=Homo sapiens GN=HIST1H3A PE=1 SV=2	55.8824	8	57	1	136	15.394	11.12	57.5	68.2	64.7	141.5	133.6	134.5	63.4667	136.533	0.464844	5.38526e-05
A0A024R608		RPLP1	Ribosomal protein, large, P1, isoform CRA_a OS=Homo sapiens GN=RPLP1 PE=3 SV=1	89.4737	4	25	2	114	11.507	4.32	62.2	60.1	63.1	85.6	174.8	154.2	61.8	138.2	0.447178	0.047255
A0A024R5H0		BANF1	Barrier to autointegration factor 1, isoform CRA_a OS=Homo sapiens GN=BANF1 PE=4 SV=1	62.9213	6	10	6	89	10.052	6.09	60.9	63.6	58.6	108.3	169.8	138.8	61.0333	138.967	0.439194	0.0119193
Q8N353		TMEM106B	TMEM106B protein (Fragment) OS=Homo sapiens GN=TMEM106B PE=2 SV=1	10.828	3	4	3	314	35.115	8.22	59.9	63.1	56.2	85.7	181.7	153.5	59.7333	140.3	0.425754	0.0477697
Q6P1A2		LPCAT3	Lysophospholipid acyltransferase 5 OS=Homo sapiens GN=LPCAT3 PE=1 SV=1	5.95483	1	2	1	487	55.998	8.69	57.7	60.6	56.3	109.7	177	138.7	58.2	141.8	0.410437	0.0128431
G3V556		C14orf2	Chromosome 14 open reading frame 2 OS=Homo sapiens GN=C14orf2 PE=1 SV=1	19.1919	2	3	2	99	11.274	9.16	58.9	56.3	57.2	98.2	182.5	147	57.4667	142.567	0.403086	0.0253321
Q8IVP5		FUNDC1	FUN14 domain-containing protein 1 OS=Homo sapiens GN=FUNDC1 PE=1 SV=1	10.9677	1	2	1	155	17.167	8.62	57.8	53.6	60.2	98.1	175.5	154.8	57.2	142.8	0.40056	0.02107
Q5D862		FLG2	Filaggrin-2 OS=Homo sapiens GN=FLG2 PE=1 SV=1	0.460059	1	1	1	2391	247.928	8.31	49.2	53.5	48.1	188.8	178.3	82.1	50.2667	149.733	0.335708	0.0429781
Q6IPH7		RPL14	RPL14 protein OS=Homo sapiens GN=RPL14 PE=1 SV=1	40.4545	10	54	1	220	23.772	10.93	139.5	126.5	139.9	118.8	37.5	37.7	135.3	64.6667	2.09227	0.0616023
Q9P021		CRIPT	Cysteine-rich PDZ-binding protein OS=Homo sapiens GN=CRIPT PE=1 SV=1	16.8317	1	1	1	101	11.209	9.47	126.9	199.1	79.9	69.8	65	59.3	135.3	64.7	2.09119	0.11236
A0A126LAV7		U12	G-protein coupled receptor OS=Homo sapiens GN=U12 PE=4 SV=1	2.59366	1	1	1	347	39.729	9.67	41.9	223.9	138.1	74.7	53.7	67.7	134.633	65.3667	2.05966	0.260768
Q8WXK3		ASB13	Ankyrin repeat and SOCS box protein 13 OS=Homo sapiens GN=ASB13 PE=1 SV=2	4.67626	1	1	1	278	29.988	6.81	132	125.4	126.1	126.9	44.8	44.8	127.833	72.1667	1.77136	0.112445
D3YTI2		ACP1	Low molecular weight phosphotyrosine protein phosphatase OS=Homo sapiens GN=ACP1 PE=1 SV=1	41.1765	2	3	1	85	9.445	8.35	95.2	173.5	108	70.7	77.7	74.9	125.567	74.4333	1.68697	0.10351
Q6NT76		HMBOX1	Homeobox-containing protein 1 OS=Homo sapiens GN=HMBOX1 PE=1 SV=1	3.80952	1	2	1	420	47.249	6.06	72.3	165.1	136.7	69.8	69.1	87	124.7	75.3	1.65604	0.153236
A2RTX5		TARSL2	Probable threonine--tRNA ligase 2, cytoplasmic OS=Homo sapiens GN=TARSL2 PE=1 SV=1	6.48379	4	7	1	802	92.586	6.05	102.2	125.6	140.5	122.4	67.5	41.9	122.767	77.2667	1.58887	0.157845
B3KPL2		PHF15	PHD finger protein 15, isoform CRA_a OS=Homo sapiens GN=PHF15 PE=2 SV=1	1.29412	1	1	1	850	93.554	5.6	147.1	104.6	114.4	101.6	61	71.3	122.033	77.9667	1.5652	0.0675884
Q53HW7			Sulfide dehydrogenase like (Fragment) OS=Homo sapiens PE=2 SV=1	55.3333	24	48	1	450	49.918	9.04	126.7	121.5	115.1	141.3	50.9	44.5	121.1	78.9	1.53485	0.250564
H7C0S8			Uncharacterized protein (Fragment) OS=Homo sapiens PE=4 SV=2	12.3779	3	3	2	307	34.525	6.37	83.3	157.2	122.7	83	75.3	78.5	121.067	78.9333	1.53378	0.121156
A8K6R0			cDNA FLJ75726, highly similar to Homo sapiens basic leucine zipper nuclear factor 1 (JEM-1) (BLZF1), mRNA OS=Homo sapiens PE=2 SV=1	3.25	1	1	1	400	44.852	8.54	129.2	113.1	118.6	107	59.7	72.4	120.3	79.7	1.50941	0.0527488
P61927		RPL37	60S ribosomal protein L37 OS=Homo sapiens GN=RPL37 PE=1 SV=2	24.7423	4	8	4	97	11.071	11.74	110.5	119.2	125.9	106.2	63.6	74.6	118.533	81.4667	1.45499	0.0518599
X5D9D2		TSC1	Tuberous sclerosis 1 isoform A (Fragment) OS=Homo sapiens GN=TSC1 PE=2 SV=1	1.37457	1	1	1	1164	129.685	6.47	170.2	99.7	85	75	73.9	96.3	118.3	81.7333	1.44739	0.251273
E9PLN8			Uncharacterized protein (Fragment) OS=Homo sapiens PE=4 SV=1	7.83133	1	2	1	166	17.934	8.62	84	192.7	78	90.2	77.9	77.3	118.233	81.8	1.4454	0.3864
A0A024RC47		ZNF24	Zinc finger protein 24 (KOX 17), isoform CRA_b OS=Homo sapiens GN=ZNF24 PE=4 SV=1	9.23913	2	2	2	368	42.102	6.21	79.9	154.4	119.3	84.4	67.1	94.9	117.867	82.1333	1.43506	0.195144
B4DYW5			cDNA FLJ61484 OS=Homo sapiens PE=2 SV=1	1.43541	1	1	1	1463	161.632	5.44	116	143.2	94.1	87.1	82.7	77	117.767	82.2667	1.43152	0.0705669
Q8NAF0		ZNF579	Zinc finger protein 579 OS=Homo sapiens GN=ZNF579 PE=1 SV=2	2.84698	1	1	1	562	60.471	8.69	95.6	171.5	84	81.3	66	101.5	117.033	82.9333	1.41117	0.3092
H0Y6Y0		BMT2	Probable methyltransferase BMT2 homolog (Fragment) OS=Homo sapiens GN=BMT2 PE=1 SV=1	3.61757	1	1	1	387	44.647	6.21	132.6	125.8	92.6	72.1	100.9	75.9	117	82.9667	1.4102	0.090269
Q9BS40		LXN	Latexin OS=Homo sapiens GN=LXN PE=1 SV=2	8.10811	1	1	1	222	25.734	5.78	136.1	106.8	107.8	104.7	59.2	85.4	116.9	83.1	1.40674	0.106979
A8K4M5			cDNA FLJ76043, highly similar to Homo sapiens cyclin T1 (CCNT1), mRNA OS=Homo sapiens PE=2 SV=1	4.40771	3	4	3	726	80.535	8.69	98.9	141.8	109	87.4	73.1	89.8	116.567	83.4333	1.39712	0.0765198
P49459		UBE2A	Ubiquitin-conjugating enzyme E2 A OS=Homo sapiens GN=UBE2A PE=1 SV=2	43.4211	3	8	3	152	17.305	5.15	97.7	122	129.9	98.5	74.7	77.2	116.533	83.4667	1.39617	0.0545528
F8VU56		PTPRB	Receptor-type tyrosine-protein phosphatase beta OS=Homo sapiens GN=PTPRB PE=1 SV=1	0.799248	1	1	1	2127	239.415	7.74	110	129.6	109.7	125.9	64.5	60.4	116.433	83.6	1.39274	0.212941
D6RDG3		BTF3	Transcription factor BTF3 (Fragment) OS=Homo sapiens GN=BTF3 PE=1 SV=3	46.789	4	16	1	109	11.795	5.9	113.3	101	134.8	99.4	71.5	79.9	116.367	83.6	1.39195	0.0636841
Q9H116		GZF1	GDNF-inducible zinc finger protein 1 OS=Homo sapiens GN=GZF1 PE=1 SV=1	1.68776	1	1	1	711	80.441	7.87	91.1	145.3	112.6	86.6	71.7	92.8	116.333	83.7	1.38988	0.126594
Q08AJ9		HIST1H2AB	Histone H2A OS=Homo sapiens GN=HIST1H2AB PE=2 SV=1	46.1538	7	75	1	130	14.127	11.05	108.1	127.1	112.5	148.2	52	52.1	115.9	84.1	1.37812	0.384044
E9PR17		CD59	CD59 glycoprotein OS=Homo sapiens GN=CD59 PE=1 SV=1	18.4615	2	6	2	130	14.519	7.77	104.8	140.8	101.5	91.5	75.7	85.8	115.7	84.3333	1.37194	0.0794173
Q5JSZ5		PRRC2B	Protein PRRC2B OS=Homo sapiens GN=PRRC2B PE=1 SV=2	0.583221	1	1	1	2229	242.817	8.34	126.8	99.3	120.9	69.2	90.1	93.8	115.667	84.3667	1.371	0.0507975
P51617		IRAK1	Interleukin-1 receptor-associated kinase 1 OS=Homo sapiens GN=IRAK1 PE=1 SV=2	1.68539	1	1	1	712	76.489	6.62	128.4	123.3	94.8	70.8	71.4	111.4	115.5	84.5333	1.36632	0.143021
Q96FX8		PERP	p53 apoptosis effector related to PMP-22 OS=Homo sapiens GN=PERP PE=2 SV=1	12.9534	1	1	1	193	21.372	7.03	97.1	128.5	120.7	84	70.4	99.4	115.433	84.6	1.36446	0.0709662
Q8NCC5		SLC37A3	Sugar phosphate exchanger 3 OS=Homo sapiens GN=SLC37A3 PE=2 SV=2	1.417	1	1	1	494	54.451	5.66	147.1	98.9	99.5	95.7	91.1	67.7	115.167	84.8333	1.35756	0.170341
Q5U0B9			Stem cell growth factor; lymphocyte secreted C-type lectin OS=Homo sapiens PE=2 SV=1	3.71517	1	1	1	323	35.573	5.16	101.8	159.1	83.9	76.8	73.9	104.5	114.933	85.0667	1.3511	0.292972
Q13201		MMRN1	Multimerin-1 OS=Homo sapiens GN=MMRN1 PE=1 SV=3	2.03583	1	1	1	1228	138.023	7.93	111.8	102.5	130.3	67.9	108.7	78.8	114.867	85.1333	1.34926	0.112798
P14174		MIF	Macrophage migration inhibitory factor OS=Homo sapiens GN=MIF PE=1 SV=4	42.6087	5	29	5	115	12.468	7.88	100.2	127.4	116.8	77.7	73.7	104.2	114.8	85.2	1.34742	0.0757084
A0A0G2JPQ3		HLA-G	HLA class I histocompatibility antigen, alpha chain G OS=Homo sapiens GN=HLA-G PE=1 SV=1	13.7026	3	5	1	343	38.843	5.99	132.8	102.2	109.3	93.9	88.2	73.5	114.767	85.2	1.34703	0.0556828
Q96CW5		TUBGCP3	Gamma-tubulin complex component 3 OS=Homo sapiens GN=TUBGCP3 PE=1 SV=2	8.37927	5	5	5	907	103.506	8.12	102.5	144.6	97.3	74.9	86.4	94.4	114.8	85.2333	1.34689	0.138491
H9E7B8		COX2	Cytochrome c oxidase subunit 2 (Fragment) OS=Homo sapiens GN=COX2 PE=3 SV=1	31.8182	7	40	1	220	24.837	4.73	74.2	162.3	107.8	89.5	77.3	88.9	114.767	85.2333	1.3465	0.319032
Q92845		KIFAP3	Kinesin-associated protein 3 OS=Homo sapiens GN=KIFAP3 PE=1 SV=2	2.52525	1	1	1	792	91.146	5.08	110.4	124.1	109.5	59.2	92.8	104	114.667	85.3333	1.34375	0.108916
H0YBZ2		CD74	HLA class II histocompatibility antigen gamma chain (Fragment) OS=Homo sapiens GN=CD74 PE=1 SV=1	23.4177	6	10	1	316	35.066	7.72	105.2	130.2	108	109.1	69.2	78.3	114.467	85.5333	1.33827	0.115483
Q16825		PTPN21	Tyrosine-protein phosphatase non-receptor type 21 OS=Homo sapiens GN=PTPN21 PE=1 SV=2	0.596252	1	1	1	1174	133.197	7.9	128.8	108.4	104.7	101.6	72.3	84.2	113.967	86.0333	1.32468	0.0694002
C9JUM1		ACTB	Actin, cytoplasmic 1 (Fragment) OS=Homo sapiens GN=ACTB PE=1 SV=1	98.9899	9	80	1	99	10.972	5.74	86.3	148.6	106.4	68.1	79.3	111.3	113.767	86.2333	1.31929	0.287518
P06454		PTMA	Prothymosin alpha OS=Homo sapiens GN=PTMA PE=1 SV=2	26.1261	2	6	2	111	12.196	3.78	99.2	135.1	105.9	77.3	87.7	94.9	113.4	86.6333	1.30896	0.0922944
A2RUK8		C8orf49	C8orf49 protein OS=Homo sapiens GN=C8orf49 PE=2 SV=1	5.65217	1	1	1	230	25.527	9.55	123.7	101.5	114.5	74.4	105.6	80.4	113.233	86.8	1.30453	0.0835329
V5YQU3		FGFR2-BICC1	FGFR2-BICC1 fusion kinase protein OS=Homo sapiens GN=FGFR2-BICC1 PE=2 SV=1	2.22363	3	6	2	1574	172.56	8.07	104.6	132.9	102.1	75.3	83.7	101.4	113.2	86.8	1.30415	0.10262
B3KUL5			Oxysterol-binding protein OS=Homo sapiens PE=2 SV=1	1.70157	1	1	1	764	83.89	8.31	103.5	140.4	95.4	85.8	95.4	79.5	113.1	86.9	1.3015	0.147174
A0A087WVC6		PTPRJ	Receptor-type tyrosine-protein phosphatase eta OS=Homo sapiens GN=PTPRJ PE=1 SV=1	1.49031	2	2	2	1342	146.467	5.62	105.1	136.7	97	95.6	80.6	85	112.933	87.0667	1.29709	0.115504
Q8IWV8		UBR2	E3 ubiquitin-protein ligase UBR2 OS=Homo sapiens GN=UBR2 PE=1 SV=1	0.740741	1	1	1	1755	200.408	6.24	90.2	126.6	121.8	80.3	87.1	93.9	112.867	87.1	1.29583	0.0997482
Q96C90		PPP1R14B	Protein phosphatase 1 regulatory subunit 14B OS=Homo sapiens GN=PPP1R14B PE=1 SV=3	34.6939	2	2	2	147	15.901	4.86	93.2	115.9	129.1	97.7	88.9	75.1	112.733	87.2333	1.29232	0.108399
P52943		CRIP2	Cysteine-rich protein 2 OS=Homo sapiens GN=CRIP2 PE=1 SV=1	15.3846	1	1	1	208	22.478	8.72	97.8	133.2	107.1	80.1	90.6	91.1	112.7	87.2667	1.29144	0.0853843
Q7Z2Z2		EFL1	Elongation factor-like GTPase 1 OS=Homo sapiens GN=EFL1 PE=1 SV=2	7.58929	6	6	6	1120	125.35	5.91	135.8	98.7	103.4	78.9	84.2	99	112.633	87.3667	1.2892	0.126467
A0A0U1RRH7		HIST1H3D	Histone H2A OS=Homo sapiens GN=HIST1H3D PE=3 SV=1	35.2941	8	92	2	170	18.541	11.52	110.2	117.1	110.5	185.5	37	39.7	112.6	87.4	1.28833	0.634883
F8W1E5		RACGAP1	Rac GTPase-activating protein 1 (Fragment) OS=Homo sapiens GN=RACGAP1 PE=1 SV=1	27.7419	3	5	1	155	16.925	8.72	125.5	104.1	108.2	100.9	75.9	85.4	112.6	87.4	1.28833	0.0619261
Q16577		PTI-1	Elongation factor 1-alpha 1 OS=Homo sapiens GN=PTI-1 PE=2 SV=1	37.6884	15	86	2	398	42.797	8.34	117.7	95	124.8	79.6	88.1	94.6	112.5	87.4333	1.28669	0.0659597
A0A087WZ62			Mannosyltransferase OS=Homo sapiens PE=3 SV=1	4.14692	2	2	2	844	95.86	8.34	97.4	136.2	103.7	110.7	63.9	88	112.433	87.5333	1.28446	0.240617
P62244		RPS15A	40S ribosomal protein S15a OS=Homo sapiens GN=RPS15A PE=1 SV=2	78.4615	12	42	5	130	14.83	10.13	112	108.5	116.8	109.8	76.3	76.6	112.433	87.5667	1.28397	0.0940896
Q02447		SP3	Transcription factor Sp3 OS=Homo sapiens GN=SP3 PE=1 SV=3	2.1767	1	1	1	781	81.876	5.26	109.5	112.1	115.2	114.4	68.9	79.8	112.267	87.7	1.28012	0.149975
V9GYT7		PSIP1	PC4 and SFRS1-interacting protein (Fragment) OS=Homo sapiens GN=PSIP1 PE=1 SV=1	38.4615	2	4	1	65	7.783	7.52	105.8	121.6	109.4	105	56.5	101.6	112.267	87.7	1.28012	0.207277
P0C221		CCDC175	Coiled-coil domain-containing protein 175 OS=Homo sapiens GN=CCDC175 PE=4 SV=2	1.63934	1	1	1	793	93.567	6.71	98.3	118.7	119.8	76.9	118.4	67.9	112.267	87.7333	1.27964	0.223594
A0A024RCZ8		KLC4	Kinesin light chain 4, isoform CRA_a OS=Homo sapiens GN=KLC4 PE=4 SV=1	5.16963	3	3	1	619	68.598	6.18	114.6	104.2	117.9	75.6	83.8	103.9	112.233	87.7667	1.27877	0.0592715
P16989		YBX3	Y-box-binding protein 3 OS=Homo sapiens GN=YBX3 PE=1 SV=4	55.914	11	39	2	372	40.066	9.77	91.6	148.4	96.7	91.6	76.5	95.2	112.233	87.7667	1.27877	0.26785
Q9UKL3		CASP8AP2	CASP8-associated protein 2 OS=Homo sapiens GN=CASP8AP2 PE=1 SV=1	0.353179	1	1	1	1982	222.52	6.58	118.9	103.4	114.3	68.8	110.7	83.8	112.2	87.7667	1.27839	0.135376
B2R7T6			cDNA, FLJ93596, highly similar to Homo sapiens sulfide quinone reductase-like (yeast) (SQRDL), mRNA OS=Homo sapiens PE=2 SV=1	55.3333	24	49	1	450	49.857	9.06	111.9	116.9	107.7	149.4	48.4	65.7	112.167	87.8333	1.27704	0.480311
O43504		LAMTOR5	Ragulator complex protein LAMTOR5 OS=Homo sapiens GN=LAMTOR5 PE=1 SV=1	96.7033	6	14	6	91	9.608	4.87	111.2	120.1	105	107.2	80	76.5	112.1	87.9	1.27531	0.0854384
Q99571		P2RX4	P2X purinoceptor 4 OS=Homo sapiens GN=P2RX4 PE=1 SV=2	3.35052	1	1	1	388	43.341	7.99	100.4	114	121.3	116.7	74.3	73.2	111.9	88.0667	1.27063	0.200697
A4D1P6		WDR91	WD repeat-containing protein 91 OS=Homo sapiens GN=WDR91 PE=1 SV=2	8.166	4	4	1	747	83.292	6.58	206.6	67.3	61.7	79.3	83.9	101.1	111.867	88.1	1.26977	0.645507
Q6P1N1		PPM2C	PPM2C protein (Fragment) OS=Homo sapiens GN=PPM2C PE=2 SV=1	12.5413	4	6	4	606	68.42	7.9	160.5	91.2	83.8	90.3	83.3	91	111.833	88.2	1.26795	0.390238
A0A0C4ZLW1		CDK5RAP2	CDK5RAP2 protein OS=Homo sapiens GN=CDK5RAP2 PE=2 SV=1	1.69044	2	4	2	1893	214.919	5.58	143.4	101.4	89.9	84.7	86.1	94.5	111.567	88.4333	1.26159	0.234589
Q9Y4A1			Talin-related protein (Fragment) OS=Homo sapiens PE=2 SV=1	11.7949	3	8	1	195	20.157	4.81	109	94.7	131	64.6	97.2	103.5	111.567	88.4333	1.26159	0.222321
Q71SF7			Endocrine transmitter regulatory protein OS=Homo sapiens PE=2 SV=1	2.97177	1	2	1	673	76.204	9.07	99.1	128.5	106.8	92.2	86	87.3	111.467	88.5	1.25951	0.0632211
Q15819		UBE2V2	Ubiquitin-conjugating enzyme E2 variant 2 OS=Homo sapiens GN=UBE2V2 PE=1 SV=4	55.8621	7	18	2	145	16.352	8.09	96.5	129.2	108.8	89.6	79	97	111.5	88.5333	1.25941	0.102221
Q52LW3		ARHGAP29	Rho GTPase-activating protein 29 OS=Homo sapiens GN=ARHGAP29 PE=1 SV=2	6.18557	7	9	7	1261	141.974	6.74	129.2	102.4	102.9	81.7	85.6	98.3	111.5	88.5333	1.25941	0.0868762
B4E2P4			cDNA FLJ58474, highly similar to Xaa-Pro aminopeptidase 1 (EC 3.4.11.9) OS=Homo sapiens PE=2 SV=1	27.7273	8	8	1	440	49.564	6.3	106.7	112.9	114.6	78.8	79.3	107.7	111.4	88.6	1.25734	0.0815698
O14569		CYB561D2	Cytochrome b561 domain-containing protein 2 OS=Homo sapiens GN=CYB561D2 PE=1 SV=1	5.40541	1	1	1	222	23.958	9.89	111.8	117.9	104.4	98.8	73.6	93.4	111.367	88.6	1.25696	0.0570948
Q8TEY7		USP33	Ubiquitin carboxyl-terminal hydrolase 33 OS=Homo sapiens GN=USP33 PE=1 SV=2	1.38004	1	1	1	942	106.659	6.02	168.3	84	81.7	77.3	85.6	103.1	111.333	88.6667	1.25564	0.484962
Q9NSI2		FAM207A	Protein FAM207A OS=Homo sapiens GN=FAM207A PE=1 SV=2	13.4783	3	4	3	230	25.441	11.08	87	158.1	88.7	88	87.8	90.2	111.267	88.6667	1.25489	0.389461
Q6ZSP3			Phospholipid-transporting ATPase OS=Homo sapiens PE=2 SV=1	0.589226	1	1	1	1188	133.485	8.12	98	127.5	108.2	106.1	75.4	84.7	111.233	88.7333	1.25357	0.147392
Q15181		PPA1	Inorganic pyrophosphatase OS=Homo sapiens GN=PPA1 PE=1 SV=2	72.6644	17	40	16	289	32.639	5.86	107.3	110.2	116	74	92.8	99.6	111.167	88.8	1.25188	0.0502819
A0A0S2Z4W2		GAN	Giant axonal neuropathy (Gigaxonin) (Fragment) OS=Homo sapiens GN=GAN PE=2 SV=1	2.34506	1	1	1	597	67.595	5.85	113	99.2	121.2	81.8	82.5	102.2	111.133	88.8333	1.25103	0.0738823
A8K732			cDNA FLJ78771, highly similar to Homo sapiens discs, large homolog 7 (Drosophila), mRNA OS=Homo sapiens PE=2 SV=1	1.18203	1	2	1	846	95.072	9	110.4	113.7	109.1	82.5	79.3	105.2	111.067	89	1.24794	0.0558435
B7Z1P2		FBXO44	F-box only protein 44 OS=Homo sapiens GN=FBXO44 PE=1 SV=1	5.46875	1	1	1	256	28.866	8.41	112.8	113.4	106.6	92.8	68.3	106.1	110.933	89.0667	1.24551	0.124631
P62273		RPS29	40S ribosomal protein S29 OS=Homo sapiens GN=RPS29 PE=1 SV=2	48.2143	3	14	3	56	6.672	10.13	103.1	112.9	116.3	102.4	76.8	88.5	110.767	89.2333	1.24131	0.0622216
A0A140VKG5		KIF2B	Kinesin-like protein OS=Homo sapiens GN=KIF2B PE=2 SV=1	2.526	2	5	2	673	76.206	8.65	133.8	94.3	104.1	102.9	81.7	83.2	110.733	89.2667	1.24048	0.192188
Q9UBI1		COMMD3	COMM domain-containing protein 3 OS=Homo sapiens GN=COMMD3 PE=1 SV=1	31.7949	5	5	5	195	22.137	5.99	120.4	113.2	98.5	84.2	85.7	98.1	110.7	89.3333	1.23918	0.0520517
Q9NR19		ACSS2	Acetyl-coenzyme A synthetase, cytoplasmic OS=Homo sapiens GN=ACSS2 PE=1 SV=1	1.85449	1	1	1	701	78.529	6.46	114.5	98.8	118.7	84.2	76.4	107.4	110.667	89.3333	1.23881	0.127145
Q9Y217		MTMR6	Myotubularin-related protein 6 OS=Homo sapiens GN=MTMR6 PE=1 SV=3	1.93237	1	1	1	621	71.922	7.66	96.6	118.6	116.7	88.1	77.9	102	110.633	89.3333	1.23843	0.0981831
P06241		FYN	Tyrosine-protein kinase Fyn OS=Homo sapiens GN=FYN PE=1 SV=3	9.68343	6	12	1	537	60.723	6.67	116.5	100	115.2	72.3	101.7	94.3	110.567	89.4333	1.2363	0.109367
A0A024R870		LRSAM1	Leucine rich repeat and sterile alpha motif containing 1, isoform CRA_a OS=Homo sapiens GN=LRSAM1 PE=4 SV=1	7.46888	3	3	3	723	83.541	5.94	99.3	121.2	111.1	88.8	78.1	101.4	110.533	89.4333	1.23593	0.0844694
A0A024R9J7		DCC1	Defective in sister chromatid cohesion homolog 1 (S. cerevisiae), isoform CRA_a OS=Homo sapiens GN=DCC1 PE=4 SV=1	1.63636	1	1	1	550	61.689	8.19	123.7	103.9	104	84.9	86.4	97.1	110.533	89.4667	1.23547	0.050646
Q15742		NAB2	NGFI-A-binding protein 2 OS=Homo sapiens GN=NAB2 PE=1 SV=1	4.7619	2	2	2	525	56.559	6.96	109.5	114.3	107.7	112.4	77.4	78.7	110.5	89.5	1.23464	0.145125
P23511		NFYA	Nuclear transcription factor Y subunit alpha OS=Homo sapiens GN=NFYA PE=1 SV=2	5.4755	1	1	1	347	36.854	8.94	141.7	107.9	81.7	88.1	84.8	95.8	110.433	89.5667	1.23297	0.303057
A0A0A0MQR1		MAP4K5	Mitogen-activated protein kinase kinase kinase kinase OS=Homo sapiens GN=MAP4K5 PE=1 SV=1	5.08274	4	4	4	846	94.963	7.83	114.4	108.3	108.4	82.5	80.2	106.2	110.367	89.6333	1.23131	0.0724002
Q9Y4X5		ARIH1	E3 ubiquitin-protein ligase ARIH1 OS=Homo sapiens GN=ARIH1 PE=1 SV=2	4.12926	2	2	2	557	64.076	5.08	104.1	122.9	104.1	82.1	76.7	110.2	110.367	89.6667	1.23086	0.163071
Q96L92		SNX27	Sorting nexin-27 OS=Homo sapiens GN=SNX27 PE=1 SV=2	9.98152	3	4	3	541	61.226	6.49	107.4	122.7	100.9	86.5	83.3	99.3	110.333	89.7	1.23003	0.0635347
B4DGD9			cDNA FLJ61112, highly similar to BTB/POZ domain-containing protein KCTD15 OS=Homo sapiens PE=2 SV=1	2.78746	1	1	1	287	32.351	7.14	109.2	118.5	103.3	96.7	77.4	95	110.333	89.7	1.23003	0.053108
Q6FHV6		ENO2	ENO2 protein OS=Homo sapiens GN=ENO2 PE=1 SV=1	17.5115	4	38	1	434	47.239	5.03	100.1	119.6	111.1	80.8	85.7	102.7	110.267	89.7333	1.22883	0.0779214
Q6FIE5		PHP14	PHP14 protein OS=Homo sapiens GN=PHP14 PE=2 SV=1	20.8	3	3	3	125	13.784	6.07	142.9	100.7	87	83.6	84	101.8	110.2	89.8	1.22717	0.31709
A8K6K2			cDNA FLJ75877, highly similar to Homo sapiens 5'-nucleotidase, cytosolic II (NT5C2), mRNA OS=Homo sapiens PE=2 SV=1	4.63458	2	2	2	561	64.918	6.14	110.7	107	112.8	72.9	92.2	104.4	110.167	89.8333	1.22635	0.0946984
B4DLR3			cDNA FLJ54020, highly similar to Heterogeneous nuclear ribonucleoprotein U OS=Homo sapiens PE=2 SV=1	48.3418	44	172	1	784	86.806	6.43	114.3	114.5	101.6	126	59.8	83.8	110.133	89.8667	1.22552	0.364214
Q8N9M5		TMEM102	Transmembrane protein 102 OS=Homo sapiens GN=TMEM102 PE=1 SV=1	6.10236	2	2	2	508	54.141	5.91	93.3	120.5	116.6	90.1	80.7	98.8	110.133	89.8667	1.22552	0.111888
X5DNM4		GLO1	Lactoylglutathione lyase (Fragment) OS=Homo sapiens GN=GLO1 PE=2 SV=1	84.7826	13	34	1	184	20.764	5.31	117.1	104.2	109.1	77.2	84.8	107.7	110.133	89.9	1.22506	0.110663
O43294		TGFB1I1	Transforming growth factor beta-1-induced transcript 1 protein OS=Homo sapiens GN=TGFB1I1 PE=1 SV=2	3.47072	1	1	1	461	49.782	7.03	103.3	93.9	133	56.4	97.3	116.1	110.067	89.9333	1.22387	0.396041
Q96Q89		KIF20B	Kinesin-like protein KIF20B OS=Homo sapiens GN=KIF20B PE=1 SV=3	1.92308	2	2	2	1820	210.5	5.67	149	93.7	87.5	93.4	85.1	91.3	110.067	89.9333	1.22387	0.364711
Q15057		ACAP2	Arf-GAP with coiled-coil, ANK repeat and PH domain-containing protein 2 OS=Homo sapiens GN=ACAP2 PE=1 SV=3	1.02828	1	1	1	778	87.973	6.8	111.7	106.4	112	79.4	82	108.6	110.033	90	1.22259	0.102783
O60506		SYNCRIP	Heterogeneous nuclear ribonucleoprotein Q OS=Homo sapiens GN=SYNCRIP PE=1 SV=2	65.9711	36	132	1	623	69.56	8.59	122.1	100.7	107.2	108.2	81.8	80	110	90	1.22222	0.145924
Q96DM3		C18orf8	Uncharacterized protein C18orf8 OS=Homo sapiens GN=C18orf8 PE=1 SV=2	7.00152	3	3	3	657	74.927	7.83	105.9	114	110.1	88	78.3	103.7	110	90	1.22222	0.0615231
Q96CT7		CCDC124	Coiled-coil domain-containing protein 124 OS=Homo sapiens GN=CCDC124 PE=1 SV=1	34.0807	9	12	9	223	25.82	9.54	99.4	128.2	102.3	88.9	86	95.1	109.967	90	1.22185	0.104491
Q5H9Q6		DKFZp781N0678	Inosine-5'-monophosphate dehydrogenase OS=Homo sapiens GN=DKFZp781N0678 PE=2 SV=1	23.7062	12	19	10	599	64.496	8.03	108.9	107	113.6	79.4	87.5	103.6	109.833	90.1667	1.21811	0.0560547
P09769		FGR	Tyrosine-protein kinase Fgr OS=Homo sapiens GN=FGR PE=1 SV=2	3.40265	2	5	1	529	59.441	5.59	99.1	113.9	116.5	90.8	77.9	101.8	109.833	90.1667	1.21811	0.0885953
Q149M6		EXPH5	Exophilin 5 OS=Homo sapiens GN=EXPH5 PE=2 SV=1	0.351936	1	3	1	1989	222.284	7.75	106.4	109.7	113.3	82	81.9	106.6	109.8	90.1667	1.21774	0.0809465
P15531		NME1	Nucleoside diphosphate kinase A OS=Homo sapiens GN=NME1 PE=1 SV=1	57.8947	9	25	1	152	17.138	6.19	128.7	96.9	103.8	92.1	93.4	85.2	109.8	90.2333	1.21685	0.12167
Q9BRP4		PAAF1	Proteasomal ATPase-associated factor 1 OS=Homo sapiens GN=PAAF1 PE=1 SV=2	6.12245	2	2	2	392	42.163	6.32	105.9	114.1	109.2	84.3	79.4	107	109.733	90.2333	1.21611	0.0917722
X6REB3		TCF3	Transcription factor E2-alpha OS=Homo sapiens GN=TCF3 PE=1 SV=2	1.91458	1	1	1	679	70.032	6.73	117.5	97.1	114.6	88.5	82.1	100.2	109.733	90.2667	1.21566	0.0786075
A1L0V1		ACTN1	ACTN1 protein (Fragment) OS=Homo sapiens GN=ACTN1 PE=2 SV=1	67.3139	18	78	1	309	35.389	5.15	104.5	101.8	122.9	80	89.7	101.2	109.733	90.3	1.21521	0.0976806
B4DTW9			cDNA FLJ57043, highly similar to Protein EMSY OS=Homo sapiens PE=2 SV=1	13.0952	1	1	1	168	19.087	9.67	87.1	115.7	126.3	58.7	97.1	115.2	109.7	90.3333	1.21439	0.395357
A8K2A8			cDNA FLJ77274, highly similar to Homo sapiens importin 13 (IPO13), mRNA OS=Homo sapiens PE=2 SV=1	1.14226	1	1	1	963	108.112	5.24	110.4	115.5	103.1	116.4	77.7	76.9	109.667	90.3333	1.21402	0.22603
V9HWA6		HEL32	Epididymis luminal protein 32 OS=Homo sapiens GN=HEL32 PE=2 SV=1	72.1212	14	38	13	165	18.493	7.85	106.5	107.3	115.2	76.9	101.4	92.8	109.667	90.3667	1.21357	0.0661837
Q86WV7		CCDC43	CCDC43 protein OS=Homo sapiens GN=CCDC43 PE=1 SV=1	4.84581	1	1	1	227	25.548	4.92	106.9	113.7	108.2	92.9	74.2	104.1	109.6	90.4	1.21239	0.0989555
B2RBE5			cDNA, FLJ95468, highly similar to Homo sapiens transcriptional coactivator tubedown-100 (TBDN100),transcript variant 1, mRNA OS=Homo sapiens PE=2 SV=1	33.7182	23	43	23	866	101.236	7.42	109.2	103.1	116.4	80.1	86.3	104.8	109.567	90.4	1.21202	0.083503
J3KS54		FLII	Protein flightless-1 homolog OS=Homo sapiens GN=FLII PE=1 SV=1	38.1429	16	31	1	700	78.038	6.32	94.2	123.8	110.7	95	81.7	94.5	109.567	90.4	1.21202	0.116748
Q969T7		NT5C3B	7-methylguanosine phosphate-specific 5'-nucleotidase OS=Homo sapiens GN=NT5C3B PE=1 SV=4	9	1	2	1	300	34.367	6.38	105.7	118.5	104.5	66	108.7	96.6	109.567	90.4333	1.21157	0.228594
A0A0A8K8C2		URLC7	Chromosome 11 open reading frame 71 OS=Homo sapiens GN=URLC7 PE=2 SV=1	6.50407	1	1	1	123	13.241	11.74	112.3	115.9	100.5	101.8	75	94.5	109.567	90.4333	1.21157	0.107499
Q9H4B6		SAV1	Protein salvador homolog 1 OS=Homo sapiens GN=SAV1 PE=1 SV=2	4.17755	1	1	1	383	44.606	9.09	119.1	91.6	117.9	92	91.8	87.5	109.533	90.4333	1.21121	0.103582
P61970		NUTF2	Nuclear transport factor 2 OS=Homo sapiens GN=NUTF2 PE=1 SV=1	51.1811	4	19	4	127	14.469	5.38	98.5	116.8	113.3	81.5	94.1	95.8	109.533	90.4667	1.21076	0.0570244
M0QZR4		ARHGEF1	Rho guanine nucleotide exchange factor 1 OS=Homo sapiens GN=ARHGEF1 PE=1 SV=1	12.7066	9	9	9	968	108.257	6.15	105.3	113.2	110.1	81	87.1	103.4	109.533	90.5	1.21031	0.0545369
A0A140VK94		RANBP1	RAN binding protein 1, isoform CRA_g OS=Homo sapiens GN=RANBP1 PE=2 SV=1	59.7015	8	34	8	201	23.296	5.29	102.9	108.9	116.7	78.1	96	97.4	109.5	90.5	1.20994	0.0618354
A8K9X5			cDNA FLJ76472, highly similar to Homo sapiens Fas (TNFRSF6) associated factor 1 (FAF1), transcript variant 1, mRNA OS=Homo sapiens PE=2 SV=1	18	8	9	8	650	73.874	4.88	105.7	112.3	110.5	78	88.3	105.2	109.5	90.5	1.20994	0.080633
Q3I5F7		ACOT6	Putative acyl-coenzyme A thioesterase 6 OS=Homo sapiens GN=ACOT6 PE=1 SV=1	3.38164	1	1	1	207	22.976	8.63	102.4	131.3	94.6	72.4	105.7	93.5	109.433	90.5333	1.20876	0.270848
Q6PCE3		PGM2L1	Glucose 1,6-bisphosphate synthase OS=Homo sapiens GN=PGM2L1 PE=1 SV=3	2.89389	2	2	2	622	70.396	7.15	103.4	114.4	110.3	81.7	83.6	106.5	109.367	90.6	1.20714	0.0942726
Q05DJ2		MTAP	Purine nucleoside phosphorylase OS=Homo sapiens GN=MTAP PE=2 SV=1	45.0413	8	17	1	242	26.773	6.84	99.9	119.6	108.7	70.3	95	106.6	109.4	90.6333	1.20706	0.196619
Q9UJX6		ANAPC2	Anaphase-promoting complex subunit 2 OS=Homo sapiens GN=ANAPC2 PE=1 SV=1	2.6764	2	2	2	822	93.769	5.22	111	102.9	114.2	96.9	76	99	109.367	90.6333	1.20669	0.0811492
P55201		BRPF1	Peregrin OS=Homo sapiens GN=BRPF1 PE=1 SV=2	1.56507	2	2	2	1214	137.412	7.93	104.8	117.7	105.6	96.1	75.7	100.1	109.367	90.6333	1.20669	0.095767
P06733		ENO1	Alpha-enolase OS=Homo sapiens GN=ENO1 PE=1 SV=2	77.8802	34	311	25	434	47.139	7.39	102.8	107	118.2	71.2	101	99.7	109.333	90.6333	1.20633	0.157084
A0A140VJK1			Testicular tissue protein Li 75 OS=Homo sapiens PE=2 SV=1	48.3582	14	34	14	335	37.408	5.39	109.5	101.5	117	75.2	95.4	101.4	109.333	90.6667	1.20588	0.109565
Q5R3I4		TTC38	Tetratricopeptide repeat protein 38 OS=Homo sapiens GN=TTC38 PE=1 SV=1	3.41151	1	1	1	469	52.753	5.99	106.9	110.1	111	75.5	83.6	112.9	109.333	90.6667	1.20588	0.177715
Q9Y2B0		CNPY2	Protein canopy homolog 2 OS=Homo sapiens GN=CNPY2 PE=1 SV=1	74.1758	13	27	13	182	20.639	4.92	106	118.4	103.5	103.4	85.6	83.1	109.3	90.7	1.20507	0.0775839
P01023		A2M	Alpha-2-macroglobulin OS=Homo sapiens GN=A2M PE=1 SV=3	2.91723	4	4	4	1474	163.188	6.46	120.3	101.4	106.2	101.5	80.6	90	109.3	90.7	1.20507	0.0882132
B4DE15		SLC35A2	UDP-galactose translocator OS=Homo sapiens GN=SLC35A2 PE=1 SV=1	10.3448	2	3	2	406	42.2	9.86	114.2	103.8	109.9	81	89.4	101.7	109.3	90.7	1.20507	0.0505603
B4DWB5			cDNA FLJ53931, highly similar to Bifunctional 3'-phosphoadenosine5'-phosphosulfate synthetase 2 OS=Homo sapiens PE=2 SV=1	2.75081	1	1	1	618	69.988	7.33	108	111.7	108.2	78.5	88.6	105	109.3	90.7	1.20507	0.0759739
O94804		STK10	Serine/threonine-protein kinase 10 OS=Homo sapiens GN=STK10 PE=1 SV=1	2.99587	2	3	1	968	112.065	6.95	101.7	107.2	119	88	82.7	101.5	109.3	90.7333	1.20463	0.0703399
L0R849		EDARADD	Alternative protein EDARADD OS=Homo sapiens GN=EDARADD PE=3 SV=1	13.9175	8	40	2	388	42.315	5.92	98.6	109.6	119.5	82.3	87.9	102.1	109.233	90.7667	1.20345	0.0937819
P14550		AKR1A1	Alcohol dehydrogenase [NADP(+)] OS=Homo sapiens GN=AKR1A1 PE=1 SV=3	42.4615	9	25	8	325	36.55	6.79	102.2	112.4	113	79.6	97.9	94.9	109.2	90.8	1.20264	0.0507614
Q5VWN6		FAM208B	Protein FAM208B OS=Homo sapiens GN=FAM208B PE=1 SV=1	0.946502	2	2	2	2430	268.675	5.9	109.9	97.4	120.3	88.3	78.5	105.6	109.2	90.8	1.20264	0.149294
Q8NEC7		GSTCD	Glutathione S-transferase C-terminal domain-containing protein OS=Homo sapiens GN=GSTCD PE=1 SV=2	2.8436	1	1	1	633	71.033	7.78	106	108.8	112.8	80.9	80.9	110.7	109.2	90.8333	1.2022	0.14395
A6NHX0		CASTOR2	Cytosolic arginine sensor for mTORC1 subunit 2 OS=Homo sapiens GN=CASTOR2 PE=1 SV=3	12.1581	3	5	3	329	36.034	5.16	114	103	110.5	75.5	97.4	99.6	109.167	90.8333	1.20183	0.0930852
Q6NW29		RWDD4	RWD domain-containing protein 4 OS=Homo sapiens GN=RWDD4 PE=1 SV=3	10.1064	2	2	2	188	21.238	5.31	102.4	110.4	114.5	88	80	104.7	109.1	90.9	1.20022	0.087873
Q3KQU3		MAP7D1	MAP7 domain-containing protein 1 OS=Homo sapiens GN=MAP7D1 PE=1 SV=1	2.85375	2	3	2	841	92.764	10.11	84.6	132.9	109.8	97.2	80.3	95.2	109.1	90.9	1.20022	0.289851
J3QQ67		RPL18	60S ribosomal protein L18 (Fragment) OS=Homo sapiens GN=RPL18 PE=1 SV=1	42.1053	8	45	8	190	21.825	11.72	106.7	111.5	109.1	104	82.3	86.4	109.1	90.9	1.20022	0.0554038
P50991		CCT4	T-complex protein 1 subunit delta OS=Homo sapiens GN=CCT4 PE=1 SV=4	75.1391	36	109	35	539	57.888	7.83	106.8	107.7	112.8	80.5	92.7	99.6	109.1	90.9333	1.19978	0.0367433
Q9Y6G9		DYNC1LI1	Cytoplasmic dynein 1 light intermediate chain 1 OS=Homo sapiens GN=DYNC1LI1 PE=1 SV=3	34.9904	11	16	10	523	56.544	6.42	113.4	102.7	111.1	80.2	95	97.6	109.067	90.9333	1.19941	0.0454996
Q15386		UBE3C	Ubiquitin-protein ligase E3C OS=Homo sapiens GN=UBE3C PE=1 SV=3	16.8975	13	16	13	1083	123.844	6.71	108	106	113.2	78.8	88.6	105.4	109.067	90.9333	1.19941	0.0876069
P63146		UBE2B	Ubiquitin-conjugating enzyme E2 B OS=Homo sapiens GN=UBE2B PE=1 SV=1	11.1842	1	2	1	152	17.302	5.01	107.7	104.8	114.7	87	89.2	96.6	109.067	90.9333	1.19941	0.011787
F2YHL6		APOBEC3G	Apolipoprotein B mRNA editing enzyme cytidine deaminase OS=Homo sapiens GN=APOBEC3G PE=2 SV=1	4.42708	2	2	1	384	46.377	8	98.9	119.3	109	107.9	84.2	80.7	109.067	90.9333	1.19941	0.155458
Q3MIH3		UBA52	Ubiquitin A-52 residue ribosomal protein fusion product 1 OS=Homo sapiens GN=UBA52 PE=2 SV=1	46.0938	9	78	1	128	14.719	9.83	102.4	107.5	117.2	104.9	83.2	84.7	109.033	90.9333	1.19905	0.0928332
Q9BQA1		WDR77	Methylosome protein 50 OS=Homo sapiens GN=WDR77 PE=1 SV=1	33.9181	9	17	9	342	36.701	5.17	107.9	108.6	110.6	85.9	88.7	98.2	109.033	90.9333	1.19905	0.00895879
B2R7T8			cDNA, FLJ93598, highly similar to Homo sapiens capping protein (actin filament) muscle Z-line, beta (CAPZB), mRNA OS=Homo sapiens PE=2 SV=1	64.3382	19	51	18	272	30.637	6	109.1	108.3	109.7	89.4	85.2	98.2	109.033	90.9333	1.19905	0.00931372
P61457		PCBD1	Pterin-4-alpha-carbinolamine dehydratase OS=Homo sapiens GN=PCBD1 PE=1 SV=2	79.8077	9	21	8	104	11.992	6.8	104.8	113.9	108.5	85.2	88.9	98.8	109.067	90.9667	1.19897	0.020178
Q7RTP0		NIPA1	Magnesium transporter NIPA1 OS=Homo sapiens GN=NIPA1 PE=1 SV=1	11.5502	2	2	2	329	34.539	8.37	102.6	120	104.5	104.1	73.5	95.3	109.033	90.9667	1.19861	0.164572
Q15542		TAF5	Transcription initiation factor TFIID subunit 5 OS=Homo sapiens GN=TAF5 PE=1 SV=3	3.125	2	2	2	800	86.776	5.64	108.7	112.7	105.7	110.7	95.9	66.3	109.033	90.9667	1.19861	0.243193
H0YNJ6		GMPR2	GMP reductase OS=Homo sapiens GN=GMPR2 PE=1 SV=1	20.8431	5	6	5	427	46.908	8.51	111.1	104.3	111.6	89.8	88.7	94.4	109	90.9667	1.19824	0.00354065
B9A6K8		TBC1D9B	TBC1 domain family, member 9B OS=Homo sapiens GN=TBC1D9B PE=2 SV=1	2.56	2	2	2	1250	140.409	5.24	110.2	104.1	112.7	86	92.3	94.6	109	90.9667	1.19824	0.00761616
Q9NYU1		UGGT2	UDP-glucose:glycoprotein glucosyltransferase 2 OS=Homo sapiens GN=UGGT2 PE=1 SV=4	4.74934	5	5	4	1516	174.624	6.89	114	110.2	102.8	85.2	93.3	94.4	109	90.9667	1.19824	0.0147015
Q8WU90		ZC3H15	Zinc finger CCCH domain-containing protein 15 OS=Homo sapiens GN=ZC3H15 PE=1 SV=1	24.6479	9	12	9	426	48.573	5.31	111.3	103.2	112.5	93.1	86	93.9	109	91	1.1978	0.00949271
Q9UHP3		USP25	Ubiquitin carboxyl-terminal hydrolase 25 OS=Homo sapiens GN=USP25 PE=1 SV=4	4.07583	3	5	3	1055	122.142	5.34	107.9	110.4	108.7	87.3	84.7	101	109	91	1.1978	0.0243868
Q6QNY5		GNE	UDP-N-acetylglucosamine-2-epimerase / N-acetylmannosamine kinase OS=Homo sapiens GN=GNE PE=2 SV=1	17.7285	10	11	10	722	79.323	6.86	104.7	108.4	113.8	83.5	92	97.6	108.967	91.0333	1.197	0.0212534
Q14103		HNRNPD	Heterogeneous nuclear ribonucleoprotein D0 OS=Homo sapiens GN=HNRNPD PE=1 SV=1	47.0423	19	74	2	355	38.41	7.81	108.7	113.2	105	137.3	65.4	70.4	108.967	91.0333	1.197	0.484415
W4VSQ9		TRIP10	Cdc42-interacting protein 4 OS=Homo sapiens GN=TRIP10 PE=1 SV=1	40.4722	17	22	17	593	67.689	6.15	105.6	113.8	107.5	85.7	90.7	96.7	108.967	91.0333	1.197	0.0112606
Q03169		TNFAIP2	Tumor necrosis factor alpha-induced protein 2 OS=Homo sapiens GN=TNFAIP2 PE=2 SV=2	6.72783	3	4	3	654	72.616	6.46	108.8	115.1	103	89	90.1	94	108.967	91.0333	1.197	0.00925282
P61024		CKS1B	Cyclin-dependent kinases regulatory subunit 1 OS=Homo sapiens GN=CKS1B PE=1 SV=1	65.8228	3	5	3	79	9.654	8.94	105.5	109.8	111.6	83.6	83.1	106.4	108.967	91.0333	1.197	0.085584
Q7Z7E8		UBE2Q1	Ubiquitin-conjugating enzyme E2 Q1 OS=Homo sapiens GN=UBE2Q1 PE=1 SV=1	6.3981	3	3	3	422	46.098	5.1	109	109.2	108.7	84	86.2	102.9	108.967	91.0333	1.197	0.0397685
A0A024R9G4		FAM49B	Family with sequence similarity 49, member B, isoform CRA_a OS=Homo sapiens GN=FAM49B PE=4 SV=1	45.3704	12	26	12	324	36.725	6.06	102.8	114.2	109.8	89.1	90.3	93.7	108.933	91.0333	1.19663	0.00759319
P30153		PPP2R1A	Serine/threonine-protein phosphatase 2A 65 kDa regulatory subunit A alpha isoform OS=Homo sapiens GN=PPP2R1A PE=1 SV=4	57.5552	27	54	21	589	65.267	5.11	108.4	105.9	112.5	85	96	92.1	108.933	91.0333	1.19663	0.00882551
A0A024RAF1		BIN1	Bridging integrator 1, isoform CRA_k OS=Homo sapiens GN=BIN1 PE=4 SV=1	19.5616	7	13	7	593	64.659	5.06	105.5	110.6	110.7	85.5	87.2	100.5	108.933	91.0667	1.19619	0.0239572
Q14114		LRP8	Low-density lipoprotein receptor-related protein 8 OS=Homo sapiens GN=LRP8 PE=1 SV=4	1.76532	1	1	1	963	105.565	5.05	106	107.3	113.5	91.6	87.8	93.8	108.933	91.0667	1.19619	0.00353487
Q9Y2S6		TMA7	Translation machinery-associated protein 7 OS=Homo sapiens GN=TMA7 PE=1 SV=1	29.6875	2	6	2	64	7.062	9.99	103.3	111.9	111.6	93.5	86.7	93	108.933	91.0667	1.19619	0.00744916
Q7KZI7		MARK2	Serine/threonine-protein kinase MARK2 OS=Homo sapiens GN=MARK2 PE=1 SV=2	14.8477	8	8	6	788	87.856	9.72	116	106	104.7	92.2	85.5	95.5	108.9	91.0667	1.19583	0.0182214
Q96BN8		OTULIN	Ubiquitin thioesterase otulin OS=Homo sapiens GN=OTULIN PE=1 SV=3	13.6364	3	4	3	352	40.237	5.47	101.5	111.3	114	85.9	91.3	96.1	108.933	91.1	1.19576	0.0206475
Q9Y2A7		NCKAP1	Nck-associated protein 1 OS=Homo sapiens GN=NCKAP1 PE=1 SV=1	23.3156	20	31	20	1128	128.707	6.62	107.6	107.4	111.8	87.6	91.7	94	108.933	91.1	1.19576	0.00163885
Q9BPU6		DPYSL5	Dihydropyrimidinase-related protein 5 OS=Homo sapiens GN=DPYSL5 PE=1 SV=1	5.49645	2	3	2	564	61.382	7.2	95.2	118.3	113.2	83.7	94.5	95.1	108.9	91.1	1.19539	0.0880365
Q0MQR4		PARG	Poly (ADP-ribose) glycohydrolase OS=Homo sapiens GN=PARG PE=2 SV=1	1.7418	1	1	1	976	110.901	6.55	106.6	118.7	101.4	85.9	92.4	95	108.9	91.1	1.19539	0.0372421
V9HW90		HEL-75	Epididymis luminal protein 75 OS=Homo sapiens GN=HEL-75 PE=2 SV=1	56.8966	21	51	21	522	56.221	8.5	102.9	113.1	110.6	87.1	92.8	93.5	108.867	91.1333	1.19459	0.0085153
Q6FGS1		TPD52L2	TPD52L2 protein OS=Homo sapiens GN=TPD52L2 PE=1 SV=1	76.2136	16	41	16	206	22.224	5.36	113.4	103.4	109.8	86.6	96.5	90.3	108.867	91.1333	1.19459	0.0124999
P32019		INPP5B	Type II inositol 1,4,5-trisphosphate 5-phosphatase OS=Homo sapiens GN=INPP5B PE=1 SV=4	2.31621	2	2	2	993	112.78	5.57	104.5	118.5	103.5	85	86.5	101.9	108.833	91.1333	1.19422	0.0711911
A8K7N0			cDNA FLJ75556, highly similar to Homo sapiens ribosomal protein L14, mRNA OS=Homo sapiens PE=2 SV=1	48.1651	11	54	2	218	23.631	10.84	108.3	106	112.3	108.8	86.6	78.1	108.867	91.1667	1.19415	0.130828
Q96SB4		SRPK1	SRSF protein kinase 1 OS=Homo sapiens GN=SRPK1 PE=1 SV=2	15.8779	8	9	5	655	74.278	6.16	107.9	106.6	112.1	95.8	84.6	93.1	108.867	91.1667	1.19415	0.00926245
Q96GZ6		SLC41A3	Solute carrier family 41 member 3 OS=Homo sapiens GN=SLC41A3 PE=1 SV=2	3.5503	1	1	1	507	54.731	7.83	106.6	117.8	102.2	93.8	81.3	98.4	108.867	91.1667	1.19415	0.0623918
Q68EM7		ARHGAP17	Rho GTPase-activating protein 17 OS=Homo sapiens GN=ARHGAP17 PE=1 SV=1	8.74007	6	8	6	881	95.377	7.62	110.9	107.2	108.4	83.4	91.3	98.8	108.833	91.1667	1.19378	0.0181586
P43034		PAFAH1B1	Platelet-activating factor acetylhydrolase IB subunit alpha OS=Homo sapiens GN=PAFAH1B1 PE=1 SV=2	41.4634	14	38	13	410	46.608	7.37	107.9	108.1	110.4	85	89.7	98.8	108.8	91.1667	1.19342	0.0129471
Q13442		PDAP1	28 kDa heat- and acid-stable phosphoprotein OS=Homo sapiens GN=PDAP1 PE=1 SV=1	32.5967	6	18	6	181	20.618	8.87	105.9	106.9	113.7	89.2	89.6	94.8	108.833	91.2	1.19335	0.00440747
O95989		NUDT3	Diphosphoinositol polyphosphate phosphohydrolase 1 OS=Homo sapiens GN=NUDT3 PE=1 SV=1	25.5814	3	5	3	172	19.459	6.34	97	122.6	106.9	92.3	86.5	94.8	108.833	91.2	1.19335	0.0879509
P43686		PSMC4	26S proteasome regulatory subunit 6B OS=Homo sapiens GN=PSMC4 PE=1 SV=2	55.0239	18	36	17	418	47.337	5.21	108.6	105.2	112.6	79.9	94.7	99	108.8	91.2	1.19298	0.0462217
Q8IZP0		ABI1	Abl interactor 1 OS=Homo sapiens GN=ABI1 PE=1 SV=4	18.8976	8	13	5	508	55.047	7.06	106.6	110.9	108.9	87.5	91.8	94.3	108.8	91.2	1.19298	0.00167919
O43156		TTI1	TELO2-interacting protein 1 homolog OS=Homo sapiens GN=TTI1 PE=1 SV=3	2.0202	2	2	2	1089	121.992	5.97	110.1	101.1	115.2	81	82.3	110.3	108.8	91.2	1.19298	0.166107
D3DUL8		KIAA1609	KIAA1609 protein, isoform CRA_a OS=Homo sapiens GN=KIAA1609 PE=4 SV=1	38.8158	10	20	1	456	51	6.33	102.8	111.9	111.6	93.9	82.6	97.1	108.767	91.2	1.19262	0.0297935
B7Z695			cDNA FLJ52742, highly similar to Periphilin-1 OS=Homo sapiens PE=2 SV=1	21.5159	8	9	2	409	46.703	8.54	122.8	104.4	99.1	100.8	84.2	88.6	108.767	91.2	1.19262	0.114535
Q9UGJ0		PRKAG2	5'-AMP-activated protein kinase subunit gamma-2 OS=Homo sapiens GN=PRKAG2 PE=1 SV=1	5.79965	3	4	1	569	63.027	9.35	116.8	102.4	107.2	91.2	98.5	84	108.8	91.2333	1.19255	0.0419371
Q96G03		PGM2	Phosphoglucomutase-2 OS=Homo sapiens GN=PGM2 PE=1 SV=4	18.4641	8	12	8	612	68.24	6.73	105.8	108	112.5	82	93.4	98.3	108.767	91.2333	1.19218	0.0282596
B2R4C1			cDNA, FLJ92036, highly similar to Homo sapiens ribosomal protein L31 (RPL31), mRNA OS=Homo sapiens PE=2 SV=1	47.2	8	28	8	125	14.486	10.54	107.9	110.7	107.6	99.8	84.5	89.4	108.733	91.2333	1.19182	0.0192714
E5RG91		VPS37A	Vacuolar protein sorting-associated protein 37A OS=Homo sapiens GN=VPS37A PE=1 SV=1	8.20189	1	1	1	317	35.025	7.83	104.8	126.3	95.1	136.3	55.8	81.6	108.733	91.2333	1.19182	0.52964
B7ZC38		SH3GLB2	Endophilin-B2 OS=Homo sapiens GN=SH3GLB2 PE=1 SV=1	36.75	12	20	11	400	44.334	5.82	107.3	104.9	114.1	86.8	93.6	93.4	108.767	91.2667	1.19175	0.0078529
Q9H6Z4		RANBP3	Ran-binding protein 3 OS=Homo sapiens GN=RANBP3 PE=1 SV=1	22.0459	10	14	10	567	60.173	4.78	108.2	107.9	110.2	87	88.2	98.6	108.767	91.2667	1.19175	0.00956922
Q6NT89		TRNP1	TMF-regulated nuclear protein 1 OS=Homo sapiens GN=TRNP1 PE=2 SV=2	3.52423	1	1	1	227	23.467	11.43	107	106.3	112.9	89.2	86.4	98.2	108.733	91.2667	1.19138	0.0133722
Q9H000		MKRN2	Probable E3 ubiquitin-protein ligase makorin-2 OS=Homo sapiens GN=MKRN2 PE=1 SV=2	1.92308	1	1	1	416	46.909	7.61	112.1	96.8	117.2	84.7	84.3	104.8	108.7	91.2667	1.19102	0.128851
Q8TEQ0		SNX29	Sorting nexin-29 OS=Homo sapiens GN=SNX29 PE=1 SV=3	1.23001	1	1	1	813	91.197	6.21	107	104.8	114.4	86.8	93.5	93.6	108.733	91.3	1.19095	0.00899915
A0A0S2Z4R1		YARS	Tyrosine--tRNA ligase (Fragment) OS=Homo sapiens GN=YARS PE=2 SV=1	62.8788	33	46	33	528	59.106	7.05	105.5	109.4	111.2	80.9	96	97	108.7	91.3	1.19058	0.0335588
Q96LD4		TRIM47	Tripartite motif-containing protein 47 OS=Homo sapiens GN=TRIM47 PE=1 SV=2	10.0313	5	5	5	638	69.488	6.44	109.7	109.9	106.5	93.4	95.1	85.4	108.7	91.3	1.19058	0.0054711
P51965		UBE2E1	Ubiquitin-conjugating enzyme E2 E1 OS=Homo sapiens GN=UBE2E1 PE=1 SV=1	12.9534	2	3	2	193	21.391	8.53	107.6	108.2	110.3	86.2	93.1	94.6	108.7	91.3	1.19058	0.00303676
Q9H814		PHAX	Phosphorylated adapter RNA export protein OS=Homo sapiens GN=PHAX PE=1 SV=1	14.7208	4	4	4	394	44.375	5.4	107	107.3	111.8	87.3	88.6	98	108.7	91.3	1.19058	0.00938852
P32189		GK	Glycerol kinase OS=Homo sapiens GN=GK PE=1 SV=3	4.65116	2	2	2	559	61.205	6.54	116.3	108.2	101.6	91.6	93.1	89.2	108.7	91.3	1.19058	0.016754
Q9UPY3		DICER1	Endoribonuclease Dicer OS=Homo sapiens GN=DICER1 PE=1 SV=3	0.468262	1	1	1	1922	218.542	5.68	102.4	117.3	106.4	88.5	87.7	97.7	108.7	91.3	1.19058	0.0338373
A0A024R5J6		CHCHD8	Coiled-coil-helix-coiled-coil-helix domain containing 8, isoform CRA_a OS=Homo sapiens GN=CHCHD8 PE=4 SV=1	70.1149	4	6	4	87	10.128	6.04	101	124.3	100.7	123.6	73.6	76.7	108.667	91.3	1.19022	0.388432
O75052		NOS1AP	Carboxyl-terminal PDZ ligand of neuronal nitric oxide synthase protein OS=Homo sapiens GN=NOS1AP PE=1 SV=3	2.7668	1	1	1	506	56.115	6.3	109.4	112.6	104.1	89.4	74.3	110.3	108.7	91.3333	1.19015	0.18078
A0A024RB89		OBFC2B	Oligonucleotide/oligosaccharide-binding fold containing 2B, isoform CRA_b OS=Homo sapiens GN=OBFC2B PE=4 SV=1	3.31754	1	1	1	211	22.324	9.06	112.9	102.7	110.4	100.9	86.8	86.3	108.667	91.3333	1.18978	0.0380722
Q59EH3			Acid phosphatase 1 isoform c variant (Fragment) OS=Homo sapiens PE=2 SV=1	66.6667	11	26	10	165	18.686	7.88	98.9	118.5	108.6	88.8	87.8	97.5	108.667	91.3667	1.18935	0.0549191
A0A024R9Y7		MAGED2	Melanoma antigen family D, 2, isoform CRA_a OS=Homo sapiens GN=MAGED2 PE=4 SV=1	42.9043	23	48	20	606	64.914	9.32	108.7	102.6	114.7	86.1	92.6	95.4	108.667	91.3667	1.18935	0.017706
P53602		MVD	Diphosphomevalonate decarboxylase OS=Homo sapiens GN=MVD PE=1 SV=1	40	9	13	9	400	43.377	7.23	101.9	110.5	113.6	86.8	85.8	101.5	108.667	91.3667	1.18935	0.0484969
A0A024RAM4		MAP1B	Microtubule-associated protein 1B, isoform CRA_b OS=Homo sapiens GN=MAP1B PE=4 SV=1	0.405186	1	1	1	2468	270.454	4.81	109.8	103	113.2	86.4	87.8	99.9	108.667	91.3667	1.18935	0.0297245
Q5U0F4		EIF3S2	Eukaryotic translation initiation factor 3 subunit I OS=Homo sapiens GN=EIF3S2 PE=2 SV=1	64	14	42	14	325	36.479	5.64	106.9	105.9	113.1	84.2	88.9	101	108.633	91.3667	1.18898	0.0346281
Q6IPJ9		LAD1	Ladinin-1 OS=Homo sapiens GN=LAD1 PE=2 SV=1	36.9439	13	26	13	517	57.068	9.6	109.1	105.4	111.4	89.3	88.9	95.9	108.633	91.3667	1.18898	0.00381742
Q5T9B7		AK1	Adenylate kinase isoenzyme 1 OS=Homo sapiens GN=AK1 PE=1 SV=1	36.1905	5	8	5	210	23.396	8.6	100.9	110.1	114.8	80.3	93.3	100.5	108.6	91.3667	1.18862	0.0744328
B2RAM2			cDNA, FLJ94999, highly similar to Homo sapiens calpain 7 (CAPN7), mRNA OS=Homo sapiens PE=2 SV=1	2.09102	1	1	1	813	92.566	7.65	106.1	106.6	113	99.3	86.9	87.9	108.567	91.3667	1.18825	0.0195083
A0A024R8A2		GAPVD1	GTPase activating protein and VPS9 domains 1, isoform CRA_d OS=Homo sapiens GN=GAPVD1 PE=4 SV=1	13.6516	14	15	14	1487	166.064	5.21	105	110.4	110.4	85.9	85.3	103	108.6	91.4	1.18818	0.0472919
Q92890		UFD1	Ubiquitin recognition factor in ER-associated degradation protein 1 OS=Homo sapiens GN=UFD1 PE=1 SV=3	45.9283	10	15	10	307	34.478	6.7	109.2	106.8	109.8	88.3	92	93.9	108.6	91.4	1.18818	0.000796079
A0A024RBL2		SDSL	Serine dehydratase-like, isoform CRA_a OS=Homo sapiens GN=SDSL PE=4 SV=1	10.9422	3	3	3	329	34.652	6.89	103.6	112.6	109.6	92.6	86.6	95	108.6	91.4	1.18818	0.00912436
P49841		GSK3B	Glycogen synthase kinase-3 beta OS=Homo sapiens GN=GSK3B PE=1 SV=2	32.1429	9	13	6	420	46.715	8.78	104.5	115.2	106.2	86.5	88.6	99.2	108.633	91.4333	1.18812	0.0287504
Q15645		TRIP13	Pachytene checkpoint protein 2 homolog OS=Homo sapiens GN=TRIP13 PE=1 SV=2	20.8333	7	13	7	432	48.52	6.09	107	104.2	114.6	79.7	94.5	100.1	108.6	91.4333	1.18775	0.0658839
P84101		SERF2	Small EDRK-rich factor 2 OS=Homo sapiens GN=SERF2 PE=1 SV=1	32.2034	3	4	3	59	6.896	10.45	104.4	117.1	104.1	89.7	84.9	99.7	108.533	91.4333	1.18702	0.0489268
P48059		LIMS1	LIM and senescent cell antigen-like-containing domain protein 1 OS=Homo sapiens GN=LIMS1 PE=1 SV=4	45.5385	11	15	11	325	37.226	8.05	105.3	112.5	107.8	89	90.1	95.3	108.533	91.4667	1.18659	0.00400469
Q2NKX8		ERCC6L	DNA excision repair protein ERCC-6-like OS=Homo sapiens GN=ERCC6L PE=1 SV=1	5.92	4	6	4	1250	141.015	5.31	111.8	105.2	108.6	86.6	84.1	103.7	108.533	91.4667	1.18659	0.0571504
O14618		CCS	Copper chaperone for superoxide dismutase OS=Homo sapiens GN=CCS PE=1 SV=1	5.10949	1	1	1	274	29.022	5.58	84.8	121.3	119.5	90.8	81.8	101.8	108.533	91.4667	1.18659	0.265997
B2RB38			cDNA, FLJ95288, highly similar to Homo sapiens feline leukemia virus subgroup C cellular receptor (FLVCR), mRNA OS=Homo sapiens PE=2 SV=1	4.68468	1	1	1	555	59.88	5.97	112.5	113.1	100	96.3	90.2	88	108.533	91.5	1.18616	0.0260913
Q9C0C2		TNKS1BP1	182 kDa tankyrase-1-binding protein OS=Homo sapiens GN=TNKS1BP1 PE=1 SV=4	23.771	24	30	24	1729	181.685	4.86	106.9	111.1	107.5	87.7	86.9	99.9	108.5	91.5	1.18579	0.0181732
A0A024R5L0		PRCP	Prolylcarboxypeptidase (Angiotensinase C), isoform CRA_a OS=Homo sapiens GN=PRCP PE=4 SV=1	27.2177	11	16	11	496	55.764	7.21	105.9	117.4	102.2	100.3	90.2	84	108.5	91.5	1.18579	0.0615002
A8K005			cDNA FLJ77896, highly similar to Homo sapiens Ras homolog enriched in brain (RHEB), mRNA OS=Homo sapiens PE=2 SV=1	50	9	15	9	184	20.453	5.92	104.8	109.2	111.5	87.1	90.8	96.6	108.5	91.5	1.18579	0.0074294
Q6DKJ4		NXN	Nucleoredoxin OS=Homo sapiens GN=NXN PE=1 SV=2	13.1034	3	4	3	435	48.362	4.97	105.3	113.3	106.8	86.1	91	97.4	108.467	91.5	1.18543	0.014284
H0YAV1		RRM2B	Ribonucleoside-diphosphate reductase subunit M2 B (Fragment) OS=Homo sapiens GN=RRM2B PE=1 SV=1	6.37255	2	2	1	408	47.047	7.55	97.1	113.4	114.8	106.1	73.3	95.2	108.433	91.5333	1.18463	0.205596
P21399		ACO1	Cytoplasmic aconitate hydratase OS=Homo sapiens GN=ACO1 PE=1 SV=3	37.6828	24	38	24	889	98.337	6.68	108.8	104.3	112.3	85	91.6	98.1	108.467	91.5667	1.18456	0.0189194
A0A024R912		UCK2	Uridine-cytidine kinase OS=Homo sapiens GN=UCK2 PE=3 SV=1	36.7816	7	10	7	261	29.281	6.7	106.9	106.4	112	83.2	90	101.5	108.433	91.5667	1.1842	0.040153
B2R8N1			cDNA, FLJ93976, highly similar to Homo sapiens COP9 homolog (COP9), mRNA OS=Homo sapiens PE=2 SV=1	36.3636	5	10	5	209	23.183	5.38	103	106.8	115.5	84.8	90	99.9	108.433	91.5667	1.1842	0.0431245
H3BM74		NUB1	NEDD8 ultimate buster 1 OS=Homo sapiens GN=NUB1 PE=1 SV=1	12.989	6	7	6	639	73.296	6.57	106.4	108.1	110.8	88.2	88.4	98.1	108.433	91.5667	1.1842	0.0086091
Q9H5X1		FAM96A	MIP18 family protein FAM96A OS=Homo sapiens GN=FAM96A PE=1 SV=1	5.625	1	1	1	160	18.343	4.88	104.6	113.3	107.4	81.6	97.2	95.9	108.433	91.5667	1.1842	0.0398289
B3KQT6			cDNA PSEC0169 fis, clone PLACE1011360, highly similar to Tetraspanin-13 OS=Homo sapiens PE=2 SV=1	3.92157	1	1	1	204	22.072	7.93	103.2	126.5	95.6	96.6	90	88.2	108.433	91.6	1.18377	0.155715
B5ME97		SEPT10	Septin 10, isoform CRA_c OS=Homo sapiens GN=SEPT10 PE=1 SV=2	18.5662	8	13	7	544	62.905	6.83	110	106.9	108.3	85	88.2	101.6	108.4	91.6	1.18341	0.0312598
B2RAQ8			cDNA, FLJ95058, highly similar to Homo sapiens carnitine palmitoyltransferase 1A (liver) (CPT1A),nuclear gene encoding mitochondrial protein, mRNA OS=Homo sapiens PE=2 SV=1	10.3493	6	7	6	773	88.283	8.59	111.6	108.9	104.7	88.1	88.3	98.4	108.4	91.6	1.18341	0.0131118
P53985		SLC16A1	Monocarboxylate transporter 1 OS=Homo sapiens GN=SLC16A1 PE=1 SV=3	11.2	4	5	4	500	53.909	8.66	108.1	111.1	106	108.9	79.9	86	108.4	91.6	1.18341	0.133749
Q96IJ6		GMPPA	Mannose-1-phosphate guanyltransferase alpha OS=Homo sapiens GN=GMPPA PE=1 SV=1	14.5238	5	7	5	420	46.262	7.21	110.6	106.7	107.9	90.3	89.8	94.8	108.4	91.6333	1.18298	0.00103351
Q9BYG5		PARD6B	Partitioning defective 6 homolog beta OS=Homo sapiens GN=PARD6B PE=1 SV=1	25	7	12	7	372	41.157	5.58	109.3	110.7	105.2	95.8	89.2	89.9	108.4	91.6333	1.18298	0.00326273
Q9UK76		JPT1	Jupiter microtubule associated homolog 1 OS=Homo sapiens GN=JPT1 PE=1 SV=3	64.9351	6	13	6	154	16.005	5.6	104.3	108.3	112.5	79.3	97.1	98.5	108.367	91.6333	1.18261	0.0647661
V9HWA9		HEL-S-62p	Epididymis secretory sperm binding protein Li 62p OS=Homo sapiens GN=HEL-S-62p PE=2 SV=1	1.20265	1	2	1	1663	187.03	6.4	107.9	104.3	112.9	91.3	74.8	108.8	108.367	91.6333	1.18261	0.173845
Q9BYN0		SRXN1	Sulfiredoxin-1 OS=Homo sapiens GN=SRXN1 PE=1 SV=2	27.0073	3	3	3	137	14.25	8.19	104.9	112.1	108.1	91.1	83.9	99.9	108.367	91.6333	1.18261	0.0299877
G5E9A6		USP11	Ubiquitin carboxyl-terminal hydrolase 11 OS=Homo sapiens GN=USP11 PE=1 SV=1	27.0652	19	34	19	920	104.965	5.33	110.8	108.3	105.9	87.7	90.1	97.1	108.333	91.6333	1.18225	0.00611331
Q9BY41		HDAC8	Histone deacetylase 8 OS=Homo sapiens GN=HDAC8 PE=1 SV=2	5.03979	1	1	1	377	41.731	5.63	104.4	117	103.6	91.6	96.2	87.1	108.333	91.6333	1.18225	0.030155
Q14790		CASP8	Caspase-8 OS=Homo sapiens GN=CASP8 PE=1 SV=1	29.4363	8	11	8	479	55.356	5.1	105.3	107	112.8	83	93.6	98.4	108.367	91.6667	1.18218	0.0303724
O76071		CIAO1	Probable cytosolic iron-sulfur protein assembly protein CIAO1 OS=Homo sapiens GN=CIAO1 PE=1 SV=1	37.7581	9	12	9	339	37.816	4.97	105	110.9	109.2	87.5	89.4	98.1	108.367	91.6667	1.18218	0.0107548
B4E0Y9		STK26	Serine/threonine-protein kinase 26 OS=Homo sapiens GN=STK26 PE=1 SV=1	45.4338	15	28	8	438	49.153	5.68	104.1	106.4	114.5	82.7	94.8	97.5	108.333	91.6667	1.18182	0.0395429
Q9H773		DCTPP1	dCTP pyrophosphatase 1 OS=Homo sapiens GN=DCTPP1 PE=1 SV=1	49.4118	8	11	8	170	18.669	5.03	105.1	111.6	108.3	84	87.9	103.1	108.333	91.6667	1.18182	0.0528347
H7BXH9		METTL21A	Protein N-lysine methyltransferase METTL21A OS=Homo sapiens GN=METTL21A PE=1 SV=1	6.35593	1	1	1	236	26.6	6.68	99.3	118.6	107.1	81.2	94	99.8	108.333	91.6667	1.18182	0.100964
Q08209		PPP3CA	Serine/threonine-protein phosphatase 2B catalytic subunit alpha isoform OS=Homo sapiens GN=PPP3CA PE=1 SV=1	8.63724	4	5	1	521	58.65	5.86	103.7	118.1	103.2	89.2	85	100.8	108.333	91.6667	1.18182	0.070275
H0YAC6		LRBA	Lipopolysaccharide-responsive and beige-like anchor protein (Fragment) OS=Homo sapiens GN=LRBA PE=1 SV=1	16.8106	18	20	1	1505	166.807	5.64	107.1	104.7	113.1	94.2	89.4	91.4	108.3	91.6667	1.18145	0.00434939
Q12872		SFSWAP	Splicing factor, suppressor of white-apricot homolog OS=Homo sapiens GN=SFSWAP PE=1 SV=3	4.10095	3	3	3	951	104.758	8.05	109.4	108	107.5	93	85.1	96.9	108.3	91.6667	1.18145	0.0091104
Q9NQ88		TIGAR	Fructose-2,6-bisphosphatase TIGAR OS=Homo sapiens GN=TIGAR PE=1 SV=1	51.4815	9	15	9	270	30.043	7.69	103	107.2	114.8	80.4	89.7	105	108.333	91.7	1.18139	0.104862
O95271		TNKS	Tankyrase-1 OS=Homo sapiens GN=TNKS PE=1 SV=2	0.602864	1	1	1	1327	141.95	7.05	54.1	202.8	68	79.2	73.3	122.6	108.3	91.7	1.18103	0.756103
Q4LE38		IKBKAP	IKBKAP variant protein (Fragment) OS=Homo sapiens GN=IKBKAP variant protein PE=2 SV=1	22.3547	20	30	20	1342	151.36	6	107.2	105.7	112	80.9	93.3	100.9	108.3	91.7	1.18103	0.0536614
P00492		HPRT1	Hypoxanthine-guanine phosphoribosyltransferase OS=Homo sapiens GN=HPRT1 PE=1 SV=2	68.3486	11	25	10	218	24.564	6.68	100.8	110.6	113.5	77.2	98.6	99.3	108.3	91.7	1.18103	0.113177
Q1HBJ4		MAPK1	Mitogen-activated protein kinase OS=Homo sapiens GN=MAPK1 PE=3 SV=1	43.0556	14	22	14	360	41.363	6.98	109.1	108.3	107.5	83.4	89.8	101.9	108.3	91.7	1.18103	0.038056
D6RCM8		TNFAIP8	Tumor necrosis factor alpha-induced protein 8 OS=Homo sapiens GN=TNFAIP8 PE=1 SV=1	10	1	1	1	200	23.242	9.1	90.6	107.4	126.9	86.3	81.5	107.3	108.3	91.7	1.18103	0.275223
V9HW53		HEL-S-277	DDAH2 OS=Homo sapiens GN=HEL-S-277 PE=1 SV=1	8.42105	2	2	1	285	29.625	6.01	112.1	104.4	108.4	95.5	93.5	86.1	108.3	91.7	1.18103	0.0101566
J9R021		eIF3a	Eukaryotic translation initiation factor 3 subunit A OS=Homo sapiens GN=eIF3a PE=2 SV=1	45.5137	59	108	59	1382	166.381	6.79	110.2	103.3	111.4	85	91.6	98.6	108.3	91.7333	1.1806	0.023816
Q14764		MVP	Major vault protein OS=Homo sapiens GN=MVP PE=1 SV=4	38.1859	24	36	24	893	99.266	5.48	110.1	105.2	109.5	86.9	91.8	96.5	108.267	91.7333	1.18023	0.00646228
A0A0C4DFY5		GPRC5C	G-protein-coupled receptor family C group 5 member C OS=Homo sapiens GN=GPRC5C PE=1 SV=1	16.2551	5	7	5	486	52.9	8.94	109.5	107.9	107.4	98.5	81.6	95.1	108.267	91.7333	1.18023	0.0335433
A0A024R4R3		CNOT3	CCR4-NOT transcription complex, subunit 3, isoform CRA_a OS=Homo sapiens GN=CNOT3 PE=4 SV=1	1.72643	1	2	1	753	81.822	6.2	106.7	108.1	109.9	93.8	82.8	98.6	108.233	91.7333	1.17987	0.0257955
Q9Y4B5		MTCL1	Microtubule cross-linking factor 1 OS=Homo sapiens GN=MTCL1 PE=1 SV=5	7.03412	10	11	10	1905	209.397	6.43	107.8	109.7	107.2	95.1	85.7	94.4	108.233	91.7333	1.17987	0.00610611
A0A024R5C6		NAT11	N-acetyltransferase 11, isoform CRA_a OS=Homo sapiens GN=NAT11 PE=4 SV=1	16.0338	3	5	3	237	27.176	7.39	112.2	107.5	105.1	94.3	90.5	90.5	108.267	91.7667	1.1798	0.00249335
Q06124		PTPN11	Tyrosine-protein phosphatase non-receptor type 11 OS=Homo sapiens GN=PTPN11 PE=1 SV=2	28.4757	14	19	14	597	68.393	7.3	106.4	109	109.3	88	89.1	98.2	108.233	91.7667	1.17944	0.00804687
Q9HD23		MRS2	Magnesium transporter MRS2 homolog, mitochondrial OS=Homo sapiens GN=MRS2 PE=1 SV=1	9.02935	3	5	3	443	50.285	6.87	106.2	109.3	109.2	96.9	89.4	89	108.233	91.7667	1.17944	0.00398089
P08729		KRT7	Keratin, type II cytoskeletal 7 OS=Homo sapiens GN=KRT7 PE=1 SV=5	62.4733	34	86	28	469	51.354	5.48	107.1	113.1	104.4	109.2	81.7	84.5	108.2	91.8	1.17865	0.146129
Q32MZ4		LRRFIP1	Leucine-rich repeat flightless-interacting protein 1 OS=Homo sapiens GN=LRRFIP1 PE=1 SV=2	31.4356	20	36	19	808	89.199	4.65	108.2	105.9	110.5	84.3	93.7	97.4	108.2	91.8	1.17865	0.0163807
A0A140VJZ4			Ubiquitin carboxyl-terminal hydrolase OS=Homo sapiens PE=2 SV=1	40.4348	8	13	8	230	26.166	4.92	106.5	105	113.1	84.2	94.4	96.8	108.2	91.8	1.17865	0.0233875
Q7Z417		NUFIP2	Nuclear fragile X mental retardation-interacting protein 2 OS=Homo sapiens GN=NUFIP2 PE=1 SV=1	28.2014	13	22	13	695	76.075	8.7	108.9	105.9	109.7	90.5	89.6	95.3	108.167	91.8	1.17829	0.00149859
Q15628		TRADD	Tumor necrosis factor receptor type 1-associated DEATH domain protein OS=Homo sapiens GN=TRADD PE=1 SV=2	4.48718	1	2	1	312	34.226	6.27	102.8	114.4	107.3	100	84.7	90.7	108.167	91.8	1.17829	0.0428317
Q9H2P9		DPH5	Diphthine methyl ester synthase OS=Homo sapiens GN=DPH5 PE=1 SV=2	18.2456	4	5	4	285	31.631	5.31	107.5	105.4	111.7	89	90.4	96.1	108.2	91.8333	1.17822	0.00457887
B4DZK0			Cysteine protease OS=Homo sapiens PE=2 SV=1	10.5882	3	4	3	510	57.284	8.53	123.5	97.6	103.5	88	90	97.5	108.2	91.8333	1.17822	0.121665
A0A1W2PNX8		UNC45A	Protein unc-45 homolog A OS=Homo sapiens GN=UNC45A PE=1 SV=1	25.8303	20	27	20	1084	118.319	6.71	107.9	106.3	110.3	86.3	90.8	98.4	108.167	91.8333	1.17786	0.011748
Q9ULC4		MCTS1	Malignant T-cell-amplified sequence 1 OS=Homo sapiens GN=MCTS1 PE=1 SV=1	59.6685	9	25	9	181	20.542	8.82	107.1	107.3	110.1	85.6	92.9	97	108.167	91.8333	1.17786	0.00927534
Q9UI14		RABAC1	Prenylated Rab acceptor protein 1 OS=Homo sapiens GN=RABAC1 PE=1 SV=1	14.5946	3	6	3	185	20.635	7.34	111	108	105.5	98.7	87.3	89.5	108.167	91.8333	1.17786	0.0130814
Q09428		ABCC8	ATP-binding cassette sub-family C member 8 OS=Homo sapiens GN=ABCC8 PE=1 SV=6	0.56926	1	1	1	1581	176.879	7.81	111.9	108.6	104	107.5	86.8	81.2	108.167	91.8333	1.17786	0.121117
Q8TC04		KRT23	Keratin 23 (Histone deacetylase inducible) OS=Homo sapiens GN=KRT23 PE=2 SV=1	2.1327	1	1	1	422	48.147	6.54	123.2	93.9	107.3	170.3	60.3	44.9	108.133	91.8333	1.1775	0.707123
V9HW62		HEL-S-74	Lactoylglutathione lyase OS=Homo sapiens GN=HEL-S-74 PE=2 SV=1	84.7826	13	32	1	184	20.706	5.47	114.4	102.2	107.8	82.4	89.1	104.1	108.133	91.8667	1.17707	0.0903952
P19623		SRM	Spermidine synthase OS=Homo sapiens GN=SRM PE=1 SV=1	38.0795	9	13	9	302	33.803	5.49	106.2	106.7	111.5	77.9	92.7	105	108.133	91.8667	1.17707	0.11225
E7EVH7			Uncharacterized protein OS=Homo sapiens PE=4 SV=1	18.1694	15	16	11	732	83.642	7.31	106.1	107.2	111.1	83.1	89.1	103.4	108.133	91.8667	1.17707	0.0588166
A0A1C7CYX9		DPYSL2	Dihydropyrimidinase-related protein 2 OS=Homo sapiens GN=DPYSL2 PE=1 SV=1	49.0399	23	46	11	677	73.457	6.35	106	104.7	113.7	81.7	94.3	99.7	108.133	91.9	1.17664	0.05447
Q04864		REL	Proto-oncogene c-Rel OS=Homo sapiens GN=REL PE=1 SV=1	11.9548	6	6	5	619	68.476	5.86	103.1	114	107.3	83.3	85.8	106.6	108.133	91.9	1.17664	0.11357
P53618		COPB1	Coatomer subunit beta OS=Homo sapiens GN=COPB1 PE=1 SV=3	47.5341	34	76	34	953	107.074	6.05	108.1	101.2	115.1	81.2	92.4	102.1	108.133	91.9	1.17664	0.0887164
A8K4Z6			cDNA FLJ76180 OS=Homo sapiens PE=2 SV=1	1.61551	1	1	1	619	70.478	9.83	108	112.6	103.8	117.6	78.2	79.9	108.133	91.9	1.17664	0.283271
Q99497		PARK7	Protein DJ-1 OS=Homo sapiens GN=PARK7 PE=1 SV=2	86.2434	17	56	17	189	19.878	6.79	103.7	111.2	109.3	83.8	95.4	96.4	108.067	91.8667	1.17634	0.0248874
Q86UX6		STK32C	Serine/threonine-protein kinase 32C OS=Homo sapiens GN=STK32C PE=1 SV=1	6.3786	2	2	2	486	54.96	6.61	108.1	111	105.2	83	82	110.7	108.1	91.9	1.17628	0.165142
A0A024R782		BPGM	Phosphoglycerate mutase OS=Homo sapiens GN=BPGM PE=2 SV=1	12.3552	2	3	2	259	29.987	6.54	99.5	115.1	109.7	88.2	90.9	96.6	108.1	91.9	1.17628	0.0357054
Q96AT9		RPE	Ribulose-phosphate 3-epimerase OS=Homo sapiens GN=RPE PE=1 SV=1	17.5439	2	3	2	228	24.911	5.58	101.8	112.1	110.3	79.6	93.3	102.8	108.067	91.9	1.17592	0.0956581
A0A024R823		WIPI2	WD repeat domain, phosphoinositide interacting 2, isoform CRA_c OS=Homo sapiens GN=WIPI2 PE=4 SV=1	2.20264	1	1	1	454	49.377	6.46	111.2	109.4	103.6	82.6	88.7	104.4	108.067	91.9	1.17592	0.0787166
Q13131		PRKAA1	5'-AMP-activated protein kinase catalytic subunit alpha-1 OS=Homo sapiens GN=PRKAA1 PE=1 SV=4	29.517	14	17	14	559	63.969	8.12	107.9	107	109.4	89.2	92.6	94	108.1	91.9333	1.17585	0.000524118
A0A1W1GSK9		ERCC4	DNA repair endonuclease XPF OS=Homo sapiens GN=ERCC4 PE=2 SV=1	4.36681	3	3	3	916	104.42	6.93	109.5	106.3	108.5	92.4	81.1	102.3	108.1	91.9333	1.17585	0.059492
E5RFR7		TPD52	Tumor protein D52 OS=Homo sapiens GN=TPD52 PE=1 SV=1	35.1351	5	9	2	111	12.381	4.68	104.3	115	104.9	87.3	93.6	94.9	108.067	91.9333	1.17549	0.0182948
Q96JH7		VCPIP1	Deubiquitinating protein VCIP135 OS=Homo sapiens GN=VCPIP1 PE=1 SV=2	2.37316	2	2	2	1222	134.236	7.2	93.4	110	120.8	77.5	83.7	114.6	108.067	91.9333	1.17549	0.312427
Q8N0V3		RBFA	Putative ribosome-binding factor A, mitochondrial OS=Homo sapiens GN=RBFA PE=1 SV=3	9.32945	3	4	3	343	38.335	7.85	107.7	112.3	104.2	100.2	89.7	86	108.067	91.9667	1.17506	0.0295185
O75496		GMNN	Geminin OS=Homo sapiens GN=GMNN PE=1 SV=1	6.2201	1	1	1	209	23.551	4.96	113.8	93.6	116.8	81.9	91.2	102.8	108.067	91.9667	1.17506	0.164221
B0YJ88		RDX	Radixin OS=Homo sapiens GN=RDX PE=2 SV=1	51.6295	33	92	18	583	68.521	6.37	106.5	106.6	111	90.2	93.2	92.5	108.033	91.9667	1.1747	0.000761976
Q96HN2		AHCYL2	Adenosylhomocysteinase 3 OS=Homo sapiens GN=AHCYL2 PE=1 SV=1	20.6219	13	23	2	611	66.678	7.36	102.9	111.2	110	93.1	85.8	97	108.033	91.9667	1.1747	0.0184183
Q05DB4		HEBP2	HEBP2 protein (Fragment) OS=Homo sapiens GN=HEBP2 PE=2 SV=1	36.9159	6	7	6	214	24.014	5.38	100.2	111.5	112.4	89	91	95.9	108.033	91.9667	1.1747	0.0221939
Q15555		MAPRE2	Microtubule-associated protein RP/EB family member 2 OS=Homo sapiens GN=MAPRE2 PE=1 SV=1	6.11621	1	1	1	327	37.008	5.57	102.4	104.3	117.3	92	86.5	97.4	108	91.9667	1.17434	0.0467668
A0A024R637		TBC1D4	TBC1 domain family, member 4, isoform CRA_b OS=Homo sapiens GN=TBC1D4 PE=4 SV=1	3.92912	4	4	4	1298	146.457	7.01	103.4	108	112.7	87.2	93.3	95.5	108.033	92	1.17428	0.0118314
Q9BV40		VAMP8	Vesicle-associated membrane protein 8 OS=Homo sapiens GN=VAMP8 PE=1 SV=1	41	4	9	4	100	11.431	7.34	105.5	115.5	103.1	108	86.5	81.5	108.033	92	1.17428	0.14847
Q8WVJ2		NUDCD2	NudC domain-containing protein 2 OS=Homo sapiens GN=NUDCD2 PE=1 SV=1	57.9618	6	11	6	157	17.665	5.07	106.8	110.7	106.6	78.4	89.2	108.5	108.033	92.0333	1.17385	0.146774
P29373		CRABP2	Cellular retinoic acid-binding protein 2 OS=Homo sapiens GN=CRABP2 PE=1 SV=2	43.4783	5	6	5	138	15.683	5.4	108.2	106.1	109.7	86.6	92.8	96.7	108	92.0333	1.17349	0.00690226
O75436		VPS26A	Vacuolar protein sorting-associated protein 26A OS=Homo sapiens GN=VPS26A PE=1 SV=2	47.7064	12	22	12	327	38.146	6.57	109.7	107	107.3	90.4	88	97.7	108	92.0333	1.17349	0.00628316
Q5W0V3		FAM160B1	Protein FAM160B1 OS=Homo sapiens GN=FAM160B1 PE=1 SV=1	1.17647	1	1	1	765	86.503	5.29	113.4	98.2	112.4	81.6	88.6	105.9	108	92.0333	1.17349	0.14147
E9PL57		NEDD8-MDP1	NEDD8-MDP1 readthrough (Fragment) OS=Homo sapiens GN=NEDD8-MDP1 PE=4 SV=1	20.5882	4	8	4	170	19.524	7.43	100.4	113.2	110.3	87.8	89.8	98.5	107.967	92.0333	1.17313	0.0349575
A0A140VJM4		KCTD12	Potassium channel tetramerisation domain containing 12 OS=Homo sapiens GN=KCTD12 PE=2 SV=1	13.2308	3	6	3	325	35.679	5.64	104.1	112.3	107.4	85.2	89.8	101.1	107.933	92.0333	1.17276	0.0397294
O60936		NOL3	Nucleolar protein 3 OS=Homo sapiens GN=NOL3 PE=1 SV=2	26.9231	4	7	4	208	22.616	4.18	99.6	113.2	111.1	78.9	91.3	106	107.967	92.0667	1.1727	0.148563
P23921		RRM1	Ribonucleoside-diphosphate reductase large subunit OS=Homo sapiens GN=RRM1 PE=1 SV=1	29.4192	19	22	19	792	90.013	7.15	103	110.6	110.2	83.3	90.9	102	107.933	92.0667	1.17234	0.0563875
Q96NR7		WWC2-AS2	Putative uncharacterized protein WWC2-AS2 OS=Homo sapiens GN=WWC2-AS2 PE=5 SV=1	9	1	1	1	200	21.342	12.28	110.4	110.6	102.8	98.6	89.8	87.8	107.933	92.0667	1.17234	0.0193931
P27540		ARNT	Aryl hydrocarbon receptor nuclear translocator OS=Homo sapiens GN=ARNT PE=1 SV=1	2.28137	1	1	1	789	86.582	6.54	108.9	107.3	107.6	85.7	98.4	92.1	107.933	92.0667	1.17234	0.0127511
B5ME19		EIF3CL	Eukaryotic translation initiation factor 3 subunit C-like protein OS=Homo sapiens GN=EIF3CL PE=3 SV=1	27.2429	24	51	24	914	105.407	5.64	109.3	104.3	110.2	85.2	89.6	101.5	107.933	92.1	1.17191	0.038285
Q9Y3D8		AK6	Adenylate kinase isoenzyme 6 OS=Homo sapiens GN=AK6 PE=1 SV=1	29.6512	4	5	4	172	20.049	4.58	106.6	106	111.2	78.9	96.7	100.7	107.933	92.1	1.17191	0.0833837
A0A1B0GTU4		PXN	Paxillin OS=Homo sapiens GN=PXN PE=1 SV=1	11.1008	7	9	7	1081	115.832	5.64	102.7	110.9	110	85.2	92.2	98.8	107.867	92.0667	1.17161	0.0283976
O14524		NEMP1	Nuclear envelope integral membrane protein 1 OS=Homo sapiens GN=NEMP1 PE=1 SV=2	3.6036	2	2	2	444	50.607	6.93	104.3	120.7	98.7	104.7	75.5	96.1	107.9	92.1	1.17155	0.220491
B2RCM2			cDNA, FLJ96156, highly similar to Homo sapiens leucyl-tRNA synthetase (LARS), mRNA OS=Homo sapiens PE=2 SV=1	43.7075	44	94	44	1176	134.352	7.2	109.2	105.3	109.2	85	93.3	98	107.9	92.1	1.17155	0.0170507
A0A0A0MTN0		CUL2	Cullin-2 OS=Homo sapiens GN=CUL2 PE=1 SV=1	32.5858	20	27	20	758	88.448	6.93	106.4	106.5	110.8	92.2	89.1	95	107.9	92.1	1.17155	0.00212166
Q0Z7K3		COX2	Cytochrome c oxidase subunit 2 OS=Homo sapiens GN=COX2 PE=3 SV=1	22.0264	5	17	1	227	25.625	4.75	97	123.6	103.1	103.3	74.2	98.8	107.9	92.1	1.17155	0.261802
Q14320		FAM50A	Protein FAM50A OS=Homo sapiens GN=FAM50A PE=1 SV=2	28.0236	9	14	9	339	40.216	6.83	111.8	103.6	108.3	86.1	92	98.2	107.9	92.1	1.17155	0.02012
A0A0S2Z5D8		WDR41	WD repeat domain 41 isoform 2 (Fragment) OS=Homo sapiens GN=WDR41 PE=2 SV=1	4.9569	2	2	2	464	52.274	5.69	103.1	118.4	102	95.3	81.5	99.5	107.833	92.1	1.17083	0.106805
Q9H3K6		BOLA2	BolA-like protein 2 OS=Homo sapiens GN=BOLA2 PE=1 SV=1	69.7674	5	13	5	86	10.11	6.52	99.3	115.3	109	86.8	92.3	97.3	107.867	92.1333	1.17077	0.0472155
V9HW48		HEL-S-115	SH3 domain-binding glutamic acid-rich-like protein OS=Homo sapiens GN=HEL-S-115 PE=2 SV=1	90.3509	9	16	9	114	12.766	5.25	101.8	110.7	111.1	82.4	99.6	94.4	107.867	92.1333	1.17077	0.0567648
Q5T6V5		C9orf64	UPF0553 protein C9orf64 OS=Homo sapiens GN=C9orf64 PE=1 SV=1	29.3255	9	12	9	341	39.004	5.88	99.2	114.4	110	79.7	101.1	95.6	107.867	92.1333	1.17077	0.115419
Q8WW12		PCNP	PEST proteolytic signal-containing nuclear protein OS=Homo sapiens GN=PCNP PE=1 SV=2	34.8315	5	6	5	178	18.913	7.49	106.3	110.9	106.4	89.1	94.8	92.5	107.867	92.1333	1.17077	0.00218436
Q9UJ68		MSRA	Mitochondrial peptide methionine sulfoxide reductase OS=Homo sapiens GN=MSRA PE=1 SV=1	21.2766	3	3	3	235	26.116	8.09	106.6	116.1	100.9	94.4	86.8	95.2	107.867	92.1333	1.17077	0.0384742
Q9Y3D0		FAM96B	Mitotic spindle-associated MMXD complex subunit MIP18 OS=Homo sapiens GN=FAM96B PE=1 SV=1	44.1718	4	9	4	163	17.652	5.19	105.2	112.5	105.8	83.3	89.8	103.3	107.833	92.1333	1.17041	0.0684188
Q9Y5Y5		PEX16	Peroxisomal membrane protein PEX16 OS=Homo sapiens GN=PEX16 PE=1 SV=2	5.65476	2	2	2	336	38.605	9.85	84.4	132.3	106.8	102.8	79.3	94.3	107.833	92.1333	1.17041	0.366974
P49321		NASP	Nuclear autoantigenic sperm protein OS=Homo sapiens GN=NASP PE=1 SV=2	50.5076	27	75	27	788	85.186	4.3	110.4	107	106.2	86.8	94.6	95.1	107.867	92.1667	1.17034	0.00621677
Q53EW4			Myotubularin-related protein 9 variant (Fragment) OS=Homo sapiens PE=2 SV=1	3.46084	2	2	2	549	63.449	6.39	120.6	101.1	101.9	79	89.5	108	107.867	92.1667	1.17034	0.212837
Q15075		EEA1	Early endosome antigen 1 OS=Homo sapiens GN=EEA1 PE=1 SV=2	11.6938	14	16	14	1411	162.367	5.68	105	109	109.5	89.3	86.5	100.7	107.833	92.1667	1.16998	0.0265819
A0A024RCR2		GNL1	GNL1 OS=Homo sapiens GN=GNL1 PE=4 SV=1	18.6161	10	14	10	607	68.619	5.8	102.8	110.2	110.5	87.4	91.3	97.8	107.833	92.1667	1.16998	0.0164845
A0A024R201		PSMD13	Proteasome (Prosome, macropain) 26S subunit, non-ATPase, 13, isoform CRA_a OS=Homo sapiens GN=PSMD13 PE=4 SV=1	43.0851	16	27	16	376	42.891	5.81	108.8	106.4	108.2	86.3	92	98.2	107.8	92.1667	1.16962	0.0112246
H7BY58		PCMT1	Protein-L-isoaspartate O-methyltransferase OS=Homo sapiens GN=PCMT1 PE=1 SV=1	52.4476	11	25	11	286	30.339	6.73	103.4	109.5	110.5	89.5	93.3	93.7	107.8	92.1667	1.16962	0.0038048
Q969S9		GFM2	Ribosome-releasing factor 2, mitochondrial OS=Homo sapiens GN=GFM2 PE=1 SV=1	14.8909	8	13	8	779	86.546	6.51	110.5	108.2	104.6	97.6	90.6	88.4	107.767	92.2	1.16884	0.008827
Q9Y3E0		GOLT1B	Vesicle transport protein GOT1B OS=Homo sapiens GN=GOLT1B PE=1 SV=1	15.942	3	6	3	138	15.415	10.36	106.8	111.3	105.3	116	80.2	80.5	107.8	92.2333	1.16877	0.264977
A0A024R0E2		CSDE1	Cold shock domain containing E1, RNA-binding, isoform CRA_a OS=Homo sapiens GN=CSDE1 PE=4 SV=1	46.3659	32	64	32	798	88.829	6.25	111.2	97.8	114.4	83.2	89.9	103.6	107.8	92.2333	1.16877	0.118985
A0A024R0W3		SLC38A2	Solute carrier family 38, member 2, isoform CRA_b OS=Homo sapiens GN=SLC38A2 PE=4 SV=1	9.09091	2	5	2	506	55.99	8	116.1	98.2	109	96.5	89.7	90.5	107.767	92.2333	1.16841	0.0508745
P55039		DRG2	Developmentally-regulated GTP-binding protein 2 OS=Homo sapiens GN=DRG2 PE=1 SV=1	13.7363	3	4	3	364	40.72	8.88	103.9	109.9	109.5	81.8	94.8	100.1	107.767	92.2333	1.16841	0.0545689
Q9GZN8		C20orf27	UPF0687 protein C20orf27 OS=Homo sapiens GN=C20orf27 PE=1 SV=3	46.5517	5	11	5	174	19.279	6.84	118.8	100.5	104	91.8	91.5	93.4	107.767	92.2333	1.16841	0.0511398
Q16775		HAGH	Hydroxyacylglutathione hydrolase, mitochondrial OS=Homo sapiens GN=HAGH PE=1 SV=2	7.79221	2	2	2	308	33.784	8.12	110.1	104.6	108.6	93.5	89.4	93.8	107.767	92.2333	1.16841	0.00201575
A0A087X2H1		HECTD1	E3 ubiquitin-protein ligase HECTD1 OS=Homo sapiens GN=HECTD1 PE=1 SV=1	8.91354	19	19	19	2614	289.451	5.43	107.2	104.8	111.3	83.9	93.4	99.5	107.767	92.2667	1.16799	0.0344915
P06132		UROD	Uroporphyrinogen decarboxylase OS=Homo sapiens GN=UROD PE=1 SV=2	42.2343	9	15	9	367	40.761	6.14	103.5	112.1	107.6	82.5	94.1	100.3	107.733	92.3	1.16721	0.0557353
B4DX01			cDNA FLJ59092 OS=Homo sapiens PE=2 SV=1	44.5255	12	28	12	274	30.501	5.95	102.1	108.6	112.4	79.7	101.1	96.1	107.7	92.3	1.16685	0.0968546
P25786		PSMA1	Proteasome subunit alpha type-1 OS=Homo sapiens GN=PSMA1 PE=1 SV=1	58.5551	15	35	15	263	29.537	6.61	111.6	104.3	107.2	85	93.4	98.5	107.7	92.3	1.16685	0.0261949
Q9Y5A9		YTHDF2	YTH domain-containing family protein 2 OS=Homo sapiens GN=YTHDF2 PE=1 SV=2	16.2349	7	11	6	579	62.296	8.79	111.3	104.6	107.2	91	85.4	100.5	107.7	92.3	1.16685	0.033045
Q9BQE4		SELENOS	Selenoprotein S OS=Homo sapiens GN=SELENOS PE=1 SV=3	25.9259	4	4	4	189	21.151	9.7	111.5	112.1	99.5	93.6	89	94.3	107.7	92.3	1.16685	0.0253933
Q96B33		CLDN23	Claudin-23 OS=Homo sapiens GN=CLDN23 PE=2 SV=2	7.53425	1	1	1	292	31.894	7.56	79.4	127.4	116.3	90.7	88.5	97.7	107.7	92.3	1.16685	0.356007
A8K333			cDNA FLJ75639, highly similar to Homo sapiens stromal membrane-associated protein 1, mRNA OS=Homo sapiens PE=2 SV=1	2.56959	1	1	1	467	50.412	8.75	105.2	109.2	108.7	75.8	98.1	103	107.7	92.3	1.16685	0.142981
Q8IV53		DENND1C	DENN domain-containing protein 1C OS=Homo sapiens GN=DENND1C PE=1 SV=1	2.12235	1	1	1	801	87.01	5.67	110.6	105.6	106.9	73.3	106.9	96.7	107.7	92.3	1.16685	0.200493
Q8NEZ2		VPS37A	Vacuolar protein sorting-associated protein 37A OS=Homo sapiens GN=VPS37A PE=1 SV=1	5.28967	1	1	1	397	44.287	5.57	93.3	137.7	92.1	76.1	107.8	93	107.7	92.3	1.16685	0.430437
A0A0S2Z5E9		CWF19L1	CWF19-like 1 cell cycle control isoform 1 (Fragment) OS=Homo sapiens GN=CWF19L1 PE=2 SV=1	28.8104	12	16	12	538	60.581	7.24	96.3	131.1	95.6	82.8	97.9	96.2	107.667	92.3	1.16649	0.291394
B4DRY1			cDNA FLJ54428, highly similar to SLIT and NTRK-like protein 1 OS=Homo sapiens PE=2 SV=1	1.43678	1	3	1	696	77.651	6.61	90.6	129	103.4	85.2	87	104.7	107.667	92.3	1.16649	0.299083
A0A0S2Z5I7		SBDS	Shwachman-Bodian-Diamond syndrome isoform 1 (Fragment) OS=Homo sapiens GN=SBDS PE=2 SV=1	68.4	18	34	18	250	28.745	8.75	100.9	109.9	112.3	78.3	96.9	101.8	107.7	92.3333	1.16643	0.125553
Q96EK6		GNPNAT1	Glucosamine 6-phosphate N-acetyltransferase OS=Homo sapiens GN=GNPNAT1 PE=1 SV=1	63.0435	8	16	8	184	20.736	7.99	100.5	109.9	112.7	85	95.5	96.5	107.7	92.3333	1.16643	0.0419853
P21359		NF1	Neurofibromin OS=Homo sapiens GN=NF1 PE=1 SV=2	0.774921	2	2	2	2839	319.168	7.39	99.9	116.7	106.5	90.3	93.3	93.4	107.7	92.3333	1.16643	0.0369817
Q8N7R7		CCNYL1	Cyclin-Y-like protein 1 OS=Homo sapiens GN=CCNYL1 PE=1 SV=2	4.73538	2	3	1	359	40.679	6.07	101.1	115.7	106.3	100.7	80.8	95.5	107.7	92.3333	1.16643	0.104148
V9HW80		HEL-S-70	Epididymis luminal protein 220 OS=Homo sapiens GN=HEL-S-70 PE=2 SV=1	66.2531	51	174	51	806	89.266	5.26	106.2	103.5	113.3	87.3	92.4	97.3	107.667	92.3333	1.16606	0.0202516
Q9Y295		DRG1	Developmentally-regulated GTP-binding protein 1 OS=Homo sapiens GN=DRG1 PE=1 SV=1	47.4114	14	30	14	367	40.517	8.9	108.6	102.3	112.1	88.8	91.9	96.3	107.667	92.3333	1.16606	0.0130537
P48147		PREP	Prolyl endopeptidase OS=Homo sapiens GN=PREP PE=1 SV=2	35.6338	18	25	18	710	80.648	5.86	103.6	107.9	111.5	76.6	97.6	102.8	107.667	92.3333	1.16606	0.139401
Q13136		PPFIA1	Liprin-alpha-1 OS=Homo sapiens GN=PPFIA1 PE=1 SV=1	8.81864	7	9	7	1202	135.695	6.29	103.3	117.9	101.8	93.2	88.6	95.2	107.667	92.3333	1.16606	0.0492691
E9KL37		OFD1	Epididymis tissue sperm binding protein Li 5a OS=Homo sapiens GN=OFD1 PE=2 SV=1	4.94071	4	4	4	1012	116.599	6.1	114.7	107	101.3	88.4	84.8	103.8	107.667	92.3333	1.16606	0.093702
A0A0S2Z3W7		ITPA	Nucleotide diphosphatase (Fragment) OS=Homo sapiens GN=ITPA PE=2 SV=1	10.8247	2	2	2	194	21.432	5.66	113.2	105.7	104.1	88	94.8	94.2	107.667	92.3333	1.16606	0.0124375
O75179		ANKRD17	Ankyrin repeat domain-containing protein 17 OS=Homo sapiens GN=ANKRD17 PE=1 SV=3	10.68	19	25	9	2603	274.088	6.52	109.6	106	107.3	90	89.8	97.2	107.633	92.3333	1.1657	0.00447961
A0A0K0L4Y0		PNPLA2	Patatin-like phospholipase domain-containing protein 2 OS=Homo sapiens GN=PNPLA2 PE=2 SV=1	17.4603	6	10	6	504	55.324	7.25	112.4	104.2	106.4	88.5	95	93.6	107.667	92.3667	1.16564	0.00827154
H0Y8C2		RPL22L1	60S ribosomal protein L22-like 1 (Fragment) OS=Homo sapiens GN=RPL22L1 PE=1 SV=1	30.9859	3	3	2	142	16.89	9.25	103.2	117.1	102.6	92.5	86.9	97.7	107.633	92.3667	1.16528	0.0545382
Q9BPY3		FAM118B	Protein FAM118B OS=Homo sapiens GN=FAM118B PE=1 SV=1	1.9943	1	1	1	351	39.474	5.99	105.7	106.4	110.8	100.1	90.1	86.9	107.633	92.3667	1.16528	0.0235082
O95757		HSPA4L	Heat shock 70 kDa protein 4L OS=Homo sapiens GN=HSPA4L PE=1 SV=3	42.789	27	47	23	839	94.453	5.88	105.8	104.8	112.2	81.4	92.8	102.9	107.6	92.3667	1.16492	0.0831172
A0A0G2JH68		DIAPH1	Protein diaphanous homolog 1 OS=Homo sapiens GN=DIAPH1 PE=1 SV=1	26.1792	23	33	23	1272	141.269	5.39	105.2	106.4	111.3	82	92.2	103	107.633	92.4	1.16486	0.0742455
B7Z992			cDNA FLJ53698, highly similar to Gelsolin OS=Homo sapiens PE=2 SV=1	29.0909	15	25	15	715	78.783	6.11	103.9	107.4	111.6	91.4	90.9	94.9	107.633	92.4	1.16486	0.00398443
B4DVR4			cDNA FLJ60912, highly similar to Vinexin OS=Homo sapiens PE=2 SV=1	23.6364	7	8	7	385	42.303	8.98	107.2	108.2	107.5	92.5	92.8	91.9	107.633	92.4	1.16486	2.7612e-06
A8K3S2			cDNA FLJ75663, highly similar to Homo sapiens zinc finger protein 403 (ZNF403), mRNA OS=Homo sapiens PE=2 SV=1	1.86514	1	1	1	697	79.034	6.49	110	112	100.8	77	101	99.2	107.6	92.4	1.1645	0.146549
P55786		NPEPPS	Puromycin-sensitive aminopeptidase OS=Homo sapiens GN=NPEPPS PE=1 SV=2	43.5256	31	58	31	919	103.211	5.72	111.2	101.5	110.1	83.2	97.3	96.7	107.6	92.4	1.1645	0.0514756
Q53GT4			Dipeptidylpeptidase III isoform 1 variant (Fragment) OS=Homo sapiens PE=2 SV=1	32.2931	14	23	1	737	82.514	5.12	106	114.1	102.6	86.1	94.9	96.2	107.567	92.4	1.16414	0.0311988
B3KS98		EIF3S3	Eukaryotic translation initiation factor 3 subunit H OS=Homo sapiens GN=EIF3S3 PE=1 SV=1	51.9126	13	34	13	366	41.555	7.33	114.2	101.5	107.1	84.9	92.5	99.9	107.6	92.4333	1.16408	0.055776
P30520		ADSS	Adenylosuccinate synthetase isozyme 2 OS=Homo sapiens GN=ADSS PE=1 SV=3	33.9912	12	18	12	456	50.066	6.55	106.3	102.6	113.8	86.4	89.3	101.6	107.567	92.4333	1.16372	0.0568615
E5KBQ3		TRAF2	TRAF2 OS=Homo sapiens GN=TRAF2 PE=2 SV=1	10.1796	5	6	5	501	55.752	7.43	102.9	109.4	110.4	85.6	91.3	100.4	107.567	92.4333	1.16372	0.0368411
V9HWC7		HEL-S-128m	Epididymis secretory sperm binding protein Li 128m OS=Homo sapiens GN=HEL-S-128m PE=2 SV=1	76.7857	18	50	18	224	25.019	6.38	101.3	108.3	113.1	75.2	99.3	102.8	107.567	92.4333	1.16372	0.180035
Q9UI26		IPO11	Importin-11 OS=Homo sapiens GN=IPO11 PE=1 SV=1	4	3	3	3	975	112.463	5.25	87.6	133.6	101.5	76.7	92.9	107.7	107.567	92.4333	1.16372	0.405725
F8WCF6		ARPC4-TTLL3	Actin-related protein 2/3 complex subunit 4 OS=Homo sapiens GN=ARPC4-TTLL3 PE=3 SV=1	46.9613	8	22	8	181	21.045	8.76	104.7	114.7	103.2	85.8	87.9	103.6	107.533	92.4333	1.16336	0.0865047
A0A087X0H9		RBM26	RNA-binding protein 26 OS=Homo sapiens GN=RBM26 PE=1 SV=1	9.31615	8	9	3	1009	113.725	9.16	107.8	108.4	106.4	92.5	92.5	92.4	107.533	92.4667	1.16294	1.42967e-05
Q5JTD0		TJAP1	Tight junction-associated protein 1 OS=Homo sapiens GN=TJAP1 PE=1 SV=1	11.8492	6	6	6	557	61.783	5.97	97.6	113.8	111.2	85.1	81.2	111.1	107.533	92.4667	1.16294	0.229855
Q53FE8			cDNA FLJ36526 fis, clone TRACH2003347, highly similar to NSFL1 cofactor p47 (Fragment) OS=Homo sapiens PE=2 SV=1	46.7568	15	24	15	370	40.547	5.14	110.3	102.9	109.3	91.4	93.4	92.6	107.5	92.4667	1.16258	0.00326236
Q96J01		THOC3	THO complex subunit 3 OS=Homo sapiens GN=THOC3 PE=1 SV=1	47.5783	12	20	12	351	38.747	6.09	109.8	103.7	109	92.9	92.7	91.9	107.5	92.5	1.16216	0.00150153
A9QQ22		WASH	Actin nucleation promoting factor (Fragment) OS=Homo sapiens GN=WASH PE=4 SV=1	11.2195	3	4	3	410	43.796	5.58	103.6	108.9	110	80.8	96.4	100.3	107.5	92.5	1.16216	0.0751759
M0R0P8		MYO9B	Unconventional myosin-IXb OS=Homo sapiens GN=MYO9B PE=1 SV=1	3.94066	5	5	5	2157	243.248	8.78	121.4	98	103.1	93.7	87.5	96.3	107.5	92.5	1.16216	0.118546
A9QUT7		HLA-A	MHC class I antigen (Fragment) OS=Homo sapiens GN=HLA-A PE=3 SV=1	49.8168	12	19	1	273	31.479	6.09	102.8	149.8	69.9	109.8	90.9	76.8	107.5	92.5	1.16216	0.581972
Q9H8Y5		ANKZF1	Ankyrin repeat and zinc finger domain-containing protein 1 OS=Homo sapiens GN=ANKZF1 PE=1 SV=1	4.26997	2	2	2	726	80.877	8.41	100.3	114.2	108	90.6	87.2	99.7	107.5	92.5	1.16216	0.0521914
A6XGL0		YJEFN3	YjeF N-terminal domain-containing protein 3 OS=Homo sapiens GN=YJEFN3 PE=1 SV=1	5.68562	1	1	1	299	32.565	6.09	119.7	103.3	99.5	107.3	88.6	81.6	107.5	92.5	1.16216	0.202902
Q59EK3			Adaptor-related protein complex 1, mu 1 subunit variant (Fragment) OS=Homo sapiens PE=2 SV=1	42.4893	15	30	15	466	53.23	8.88	106.4	111.8	104.2	89.6	90.6	97.3	107.467	92.5	1.1618	0.0106198
H0UI66		ZNF217	Zinc finger protein 217, isoform CRA_b OS=Homo sapiens GN=ZNF217 PE=4 SV=1	1.03676	1	1	1	1061	116.375	8.28	105.3	107.3	109.8	86.7	90.9	99.9	107.467	92.5	1.1618	0.0218564
A0A024R0F6		TRIM33	Tripartite motif-containing 33, isoform CRA_a OS=Homo sapiens GN=TRIM33 PE=4 SV=1	8.07453	7	9	6	1127	122.444	6.67	102.1	119.3	101.1	89.7	88.3	99.6	107.5	92.5333	1.16174	0.0957401
A8K1U9			cDNA FLJ76762, highly similar to Homo sapiens suppressor of zeste 12 homolog (Drosophila) (SUZ12), mRNA OS=Homo sapiens PE=2 SV=1	12.8552	6	6	6	739	82.964	8.81	104.9	112.2	105.4	99	85.7	92.9	107.5	92.5333	1.16174	0.0293683
Q9Y4E6		WDR7	WD repeat-containing protein 7 OS=Homo sapiens GN=WDR7 PE=1 SV=2	0.872483	1	1	1	1490	163.705	6.92	111.9	101.6	108.9	113.6	87.1	76.9	107.467	92.5333	1.16138	0.258851
O00178		GTPBP1	GTP-binding protein 1 OS=Homo sapiens GN=GTPBP1 PE=1 SV=3	10.9118	6	9	6	669	72.408	8.34	102.5	109.7	110.1	86.8	90.2	100.6	107.433	92.5333	1.16102	0.0367565
O75712		GJB3	Gap junction beta-3 protein OS=Homo sapiens GN=GJB3 PE=1 SV=1	4.07407	1	1	1	270	30.798	8.59	106.5	119	96.9	85.7	80.8	111.2	107.467	92.5667	1.16097	0.260931
A0A024R4E5		HDLBP	High density lipoprotein binding protein (Vigilin), isoform CRA_a OS=Homo sapiens GN=HDLBP PE=1 SV=1	48.4227	46	96	46	1268	141.352	6.87	107.7	102.8	111.8	93.5	89	95.2	107.433	92.5667	1.1606	0.00960768
B2R6D4			Phosphomannomutase OS=Homo sapiens PE=2 SV=1	25.6098	5	6	5	246	28.036	6.77	100.8	109.5	112	80.8	92.7	104.2	107.433	92.5667	1.1606	0.120658
Q96ED9		HOOK2	Protein Hook homolog 2 OS=Homo sapiens GN=HOOK2 PE=1 SV=3	6.67594	2	2	2	719	83.155	5.47	93.3	125.2	103.8	88.1	83.9	105.7	107.433	92.5667	1.1606	0.266389
A0A024R1A4		UBE2L3	Ubiquitin-conjugating enzyme E2L 3, isoform CRA_a OS=Homo sapiens GN=UBE2L3 PE=3 SV=1	75.974	12	32	12	154	17.85	8.51	99.2	109.9	113.2	83.7	95.9	98.1	107.433	92.5667	1.1606	0.0731987
Q6NX51		EXOC4	Exocyst complex component 4 OS=Homo sapiens GN=EXOC4 PE=2 SV=1	12.115	8	10	8	974	110.429	6.49	109.8	106.7	105.7	85.9	89.3	102.5	107.4	92.5667	1.16024	0.0465581
B2R6Z3			cDNA, FLJ93192, highly similar to Homo sapiens serine/threonine kinase 6 (STK6), mRNA OS=Homo sapiens PE=2 SV=1	7.69231	2	2	2	403	45.757	9.39	114.8	93.3	114.2	95.2	81.5	101.1	107.433	92.6	1.16019	0.180202
Q6ZMI0		PPP1R21	Protein phosphatase 1 regulatory subunit 21 OS=Homo sapiens GN=PPP1R21 PE=1 SV=1	15.1282	6	8	6	780	88.26	6.84	108.1	106.8	107.4	85.4	88.1	104.3	107.433	92.6	1.16019	0.0661755
A0A087WVQ9		EEF1A1	Elongation factor 1-alpha 1 OS=Homo sapiens GN=EEF1A1 PE=1 SV=1	71.4286	27	259	8	441	47.853	9.03	105.1	97.2	119.8	75.3	100.9	101.5	107.367	92.5667	1.15988	0.245412
Q92572		AP3S1	AP-3 complex subunit sigma-1 OS=Homo sapiens GN=AP3S1 PE=1 SV=1	34.715	5	8	5	193	21.718	5.39	108.4	108.6	105.2	83.9	93.3	100.6	107.4	92.6	1.15983	0.0405225
B4E299			cDNA FLJ54574, highly similar to Staphylococcal nuclease domain-containing protein 1 OS=Homo sapiens PE=2 SV=1	62.2047	52	162	22	889	99.616	7.06	108.2	103.3	110.7	91.4	90	96.4	107.4	92.6	1.15983	0.00709384
P46734		MAP2K3	Dual specificity mitogen-activated protein kinase kinase 3 OS=Homo sapiens GN=MAP2K3 PE=1 SV=2	35.7349	10	14	10	347	39.293	7.43	105.3	108.9	108	82.8	91.5	103.5	107.4	92.6	1.15983	0.0721983
O43278		SPINT1	Kunitz-type protease inhibitor 1 OS=Homo sapiens GN=SPINT1 PE=1 SV=2	1.89036	1	1	1	529	58.36	6.29	110.1	116.4	95.7	95.5	90.3	92	107.4	92.6	1.15983	0.0790492
O00154		ACOT7	Cytosolic acyl coenzyme A thioester hydrolase OS=Homo sapiens GN=ACOT7 PE=1 SV=3	49.4737	15	33	15	380	41.769	8.54	105.6	108.9	107.6	90.4	91	96.5	107.367	92.6333	1.15905	0.0024378
Q6UW78		UQCC3	Ubiquinol-cytochrome-c reductase complex assembly factor 3 OS=Homo sapiens GN=UQCC3 PE=1 SV=2	38.7097	2	3	2	93	10.074	9.41	104.9	108.5	108.7	95.8	85.9	96.2	107.367	92.6333	1.15905	0.014774
A0A0S2PZM4		JMJD6	Bifunctional arginine demethylase and lysyl-hydroxylase JMJD6 OS=Homo sapiens GN=JMJD6 PE=4 SV=1	7.97101	2	2	2	414	47.57	8.73	111.5	102.1	108.4	86.1	89.5	102.3	107.333	92.6333	1.15869	0.0600642
P38606		ATP6V1A	V-type proton ATPase catalytic subunit A OS=Homo sapiens GN=ATP6V1A PE=1 SV=2	46.6775	21	38	21	617	68.26	5.52	109.6	105.9	106.6	85.7	92.1	100.2	107.367	92.6667	1.15863	0.0277261
Q9H0C8		ILKAP	Integrin-linked kinase-associated serine/threonine phosphatase 2C OS=Homo sapiens GN=ILKAP PE=1 SV=1	39.5408	12	18	12	392	42.88	7.09	108.9	105.9	107.2	89.2	92.6	96.2	107.333	92.6667	1.15827	0.0026293
B8ZZC8		METTL5	Methyltransferase-like protein 5 OS=Homo sapiens GN=METTL5 PE=1 SV=1	4.5082	1	1	1	244	27.755	8.22	104.2	104.4	113.3	82	96.7	99.3	107.3	92.6667	1.15791	0.0765293
Q8N2Y8		RUSC2	Iporin OS=Homo sapiens GN=RUSC2 PE=1 SV=3	1.31926	1	1	1	1516	161.125	6.62	87	110.8	124.1	76.6	91.8	109.6	107.3	92.6667	1.15791	0.368384
Q9UIC8		LCMT1	Leucine carboxyl methyltransferase 1 OS=Homo sapiens GN=LCMT1 PE=1 SV=2	16.4671	5	5	5	334	38.354	6.04	98.5	113.2	110.3	88.6	90.3	99.2	107.333	92.7	1.15786	0.0583233
Q53ET9			Ariadne homolog 2 variant (Fragment) OS=Homo sapiens PE=2 SV=1	5.67951	2	2	2	493	57.763	5.63	106.9	104.4	110.7	96.1	87.4	94.6	107.333	92.7	1.15786	0.0108048
B7Z213			cDNA FLJ50130, highly similar to Heterogeneous nuclear ribonucleoprotein Q OS=Homo sapiens PE=2 SV=1	37.8906	9	29	2	256	28.561	9.17	105	105	111.9	97.7	92.5	87.9	107.3	92.7	1.1575	0.0160915
X5D945		HRAS	Harvey rat sarcoma viral oncoprotein isoform A (Fragment) OS=Homo sapiens GN=HRAS PE=2 SV=1	65.6085	9	18	1	189	21.285	5.31	99.6	126.7	95.6	107	82.2	88.9	107.3	92.7	1.1575	0.299515
A0A024RA85		CDC2L5	Cell division cycle 2-like 5 (Cholinesterase-related cell division controller), isoform CRA_a OS=Homo sapiens GN=CDC2L5 PE=4 SV=1	2.77778	3	6	1	1512	164.823	9.69	104.9	122	94.9	86.5	93.1	98.5	107.267	92.7	1.15714	0.167064
P13639		EEF2	Elongation factor 2 OS=Homo sapiens GN=EEF2 PE=1 SV=4	63.0536	53	222	52	858	95.277	6.83	105.1	98.9	117.9	75.6	100.6	102	107.3	92.7333	1.15708	0.227924
E1NZA1		PRIC295	Peroxisome proliferator activated receptor interacting complex protein OS=Homo sapiens GN=PRIC295 PE=2 SV=1	29.8016	64	103	64	2671	292.558	7.43	106.9	102.8	112.2	79.7	97.2	101.3	107.3	92.7333	1.15708	0.11166
Q8N543		OGFOD1	Prolyl 3-hydroxylase OGFOD1 OS=Homo sapiens GN=OGFOD1 PE=1 SV=1	28.0443	12	16	12	542	63.206	5.11	112.5	102	107.4	84.8	92.5	100.9	107.3	92.7333	1.15708	0.05852
P49770		EIF2B2	Translation initiation factor eIF-2B subunit beta OS=Homo sapiens GN=EIF2B2 PE=1 SV=3	25.3561	7	11	7	351	38.965	6.16	99	113.6	109.2	90.5	89.1	98.6	107.267	92.7333	1.15672	0.0501697
B5BTZ7		PPP2R5E	Serine/threonine-protein phosphatase 2A 56 kDa regulatory subunit epsilon isoform OS=Homo sapiens GN=PPP2R5E PE=2 SV=1	14.9893	5	6	4	467	54.635	7.17	107.5	107.3	107	85.2	87.1	105.9	107.267	92.7333	1.15672	0.0927104
Q5H9N4		DKFZp686L20222	Putative uncharacterized protein DKFZp686L20222 OS=Homo sapiens GN=DKFZp686L20222 PE=3 SV=1	52.8053	15	33	13	303	34.756	8.95	110.4	99.7	111.6	85.7	95.2	97.3	107.233	92.7333	1.15636	0.0493954
Q13501		SQSTM1	Sequestosome-1 OS=Homo sapiens GN=SQSTM1 PE=1 SV=1	43.8636	9	15	9	440	47.657	5.22	110.9	105.2	105.6	101.9	83.2	93.1	107.233	92.7333	1.15636	0.0638752
Q96T51		RUFY1	RUN and FYVE domain-containing protein 1 OS=Homo sapiens GN=RUFY1 PE=1 SV=2	9.60452	5	5	5	708	79.767	5.74	106.4	111.5	103.9	83	94	101.3	107.267	92.7667	1.15631	0.0658358
H7BXF5		SAP130	Histone deacetylase complex subunit SAP130 OS=Homo sapiens GN=SAP130 PE=1 SV=1	2.08333	2	2	2	1056	111.217	9.91	111.5	108.1	102.1	99.5	89.1	89.7	107.233	92.7667	1.15595	0.0292068
P18077		RPL35A	60S ribosomal protein L35a OS=Homo sapiens GN=RPL35A PE=1 SV=2	55.4545	12	36	12	110	12.53	11.06	104.7	109.8	107.1	103.7	86.1	88.6	107.2	92.8	1.15517	0.064659
Q9H008		LHPP	Phospholysine phosphohistidine inorganic pyrophosphate phosphatase OS=Homo sapiens GN=LHPP PE=1 SV=2	7.77778	1	1	1	270	29.147	6.15	98.5	111.3	111.8	73.4	112.9	92.1	107.2	92.8	1.15517	0.303613
P40123		CAP2	Adenylyl cyclase-associated protein 2 OS=Homo sapiens GN=CAP2 PE=1 SV=1	9.01468	4	4	4	477	52.791	6.37	102.5	109.3	109.7	84.7	94.7	99	107.167	92.8	1.15481	0.0411495
Q9BVC5		C2orf49	Ashwin OS=Homo sapiens GN=C2orf49 PE=1 SV=1	15.0862	2	2	2	232	25.843	9.74	103.9	108.5	109.1	94.1	87.3	97	107.167	92.8	1.15481	0.0122588
Q8N1S5		SLC39A11	Zinc transporter ZIP11 OS=Homo sapiens GN=SLC39A11 PE=2 SV=3	13.4503	4	4	4	342	35.373	5.6	100.6	117.2	103.7	104.4	79.2	94.8	107.167	92.8	1.15481	0.183252
Q9NSC5		HOMER3	Homer protein homolog 3 OS=Homo sapiens GN=HOMER3 PE=1 SV=2	13.2964	3	3	1	361	39.812	5.45	117.7	104.3	99.6	94.7	87.2	96.6	107.2	92.8333	1.15476	0.0792249
O75443		TECTA	Alpha-tectorin OS=Homo sapiens GN=TECTA PE=1 SV=3	0.556845	1	1	1	2155	239.37	5.4	115.5	93.5	112.6	105.4	94.5	78.6	107.2	92.8333	1.15476	0.239322
A0A024QZE9		FLJ20643	Uncharacterized protein OS=Homo sapiens GN=FLJ20643 PE=4 SV=1	32.4138	6	9	6	290	32.41	5.07	105.1	106.8	109.6	84.2	93	101.3	107.167	92.8333	1.1544	0.0485217
R9QDW3		STAT2	Signal transducer and activator of transcription OS=Homo sapiens GN=STAT2 PE=3 SV=1	1.52761	1	1	1	851	97.836	5.45	104.8	110.1	106.6	85	97.3	96.2	107.167	92.8333	1.1544	0.0274944
Q13085		ACACA	Acetyl-CoA carboxylase 1 OS=Homo sapiens GN=ACACA PE=1 SV=2	21.0997	35	52	35	2346	265.385	6.37	105.9	107.7	107.8	88.5	90.9	99.1	107.133	92.8333	1.15404	0.0119125
P22059		OSBP	Oxysterol-binding protein 1 OS=Homo sapiens GN=OSBP PE=1 SV=1	32.5898	20	31	20	807	89.365	7.3	106.9	104.8	109.7	89.2	89.1	100.2	107.133	92.8333	1.15404	0.0223055
B4DZH6			Histone deacetylase OS=Homo sapiens PE=2 SV=1	4.88202	4	6	4	1229	132.696	5.36	119.4	109.8	92.3	91.1	84.8	102.7	107.167	92.8667	1.15398	0.207048
A0A024R6N2		CDC42BPB	CDC42 binding protein kinase beta (DMPK-like), isoform CRA_a OS=Homo sapiens GN=CDC42BPB PE=3 SV=1	13.5009	19	27	7	1711	194.193	6.37	105.6	110.7	105.1	89.6	91.9	97.1	107.133	92.8667	1.15363	0.00745907
Q9Y6I3		EPN1	Epsin-1 OS=Homo sapiens GN=EPN1 PE=1 SV=2	7.98611	2	3	2	576	60.256	4.83	121	99.1	101.3	93.9	82.4	102.3	107.133	92.8667	1.15363	0.189711
Q86TB9		PATL1	Protein PAT1 homolog 1 OS=Homo sapiens GN=PATL1 PE=1 SV=2	11.8182	6	7	6	770	86.796	6.67	109.8	100.6	111	85.7	92.8	100.1	107.133	92.8667	1.15363	0.0545065
Q7Z2E3		APTX	Aprataxin OS=Homo sapiens GN=APTX PE=1 SV=2	9.55056	3	5	3	356	40.714	9.17	107.9	109.1	104.4	104.5	84.3	89.8	107.133	92.8667	1.15363	0.0825743
P78345		RPP38	Ribonuclease P protein subunit p38 OS=Homo sapiens GN=RPP38 PE=1 SV=2	14.841	5	6	5	283	31.815	9.92	103.1	110.6	107.7	94.2	88.8	95.6	107.133	92.8667	1.15363	0.00904833
Q9GZP8		IMUP	Immortalization up-regulated protein OS=Homo sapiens GN=IMUP PE=1 SV=1	33.0189	2	3	2	106	10.891	9.73	111.3	105.9	104.2	84.4	91.9	102.3	107.133	92.8667	1.15363	0.063891
B5BTZ6		STAT3	Signal transducer and activator of transcription OS=Homo sapiens GN=STAT3 PE=2 SV=1	44.7334	24	42	1	769	87.943	6.2	116.5	102.6	102.2	90.8	91.6	96.2	107.1	92.8667	1.15327	0.0463767
P05161		ISG15	Ubiquitin-like protein ISG15 OS=Homo sapiens GN=ISG15 PE=1 SV=5	27.2727	4	7	4	165	17.876	7.44	102.4	106.7	112.2	87.8	95.1	95.7	107.1	92.8667	1.15327	0.0201385
Q96TA1		FAM129B	Niban-like protein 1 OS=Homo sapiens GN=FAM129B PE=1 SV=3	24.933	11	14	11	746	84.085	6.19	106.1	102	113.2	78.9	98.3	101.4	107.1	92.8667	1.15327	0.140675
Q12986		NFX1	Transcriptional repressor NF-X1 OS=Homo sapiens GN=NFX1 PE=1 SV=2	2.23214	2	2	2	1120	124.312	8.24	105.3	117.3	98.7	89.3	81.2	108.1	107.1	92.8667	1.15327	0.214245
Q9UK22		FBXO2	F-box only protein 2 OS=Homo sapiens GN=FBXO2 PE=1 SV=2	28.0405	6	9	6	296	33.307	4.37	103.9	110.1	107.4	84.4	99.3	95	107.133	92.9	1.15321	0.0407692
P17275		JUNB	Transcription factor jun-B OS=Homo sapiens GN=JUNB PE=1 SV=1	7.20461	1	1	1	347	35.857	9.22	115.5	94.7	111.2	103.8	92	82.9	107.133	92.9	1.15321	0.179648
O00487		PSMD14	26S proteasome non-ATPase regulatory subunit 14 OS=Homo sapiens GN=PSMD14 PE=1 SV=1	47.4194	10	22	10	310	34.555	6.52	109.7	103.8	107.8	84.6	93.8	100.3	107.1	92.9	1.15285	0.0435578
A0A087WT12		GPX4	Glutathione peroxidase OS=Homo sapiens GN=GPX4 PE=1 SV=1	35.6223	7	16	7	233	26.931	10.07	107.5	105.5	108.3	86.3	95.6	96.8	107.1	92.9	1.15285	0.0142508
A0A024R683		ATP6V1D	ATPase, H+ transporting, lysosomal 34kDa, V1 subunit D, isoform CRA_a OS=Homo sapiens GN=ATP6V1D PE=4 SV=1	40.8907	7	7	7	247	28.245	9.36	102.3	120.1	98.9	98.7	87	93	107.1	92.9	1.15285	0.127079
Q09666		AHNAK	Neuroblast differentiation-associated protein AHNAK OS=Homo sapiens GN=AHNAK PE=1 SV=2	78.2852	302	820	301	5890	628.699	6.15	109.5	101.9	109.9	99.9	89.2	89.6	107.1	92.9	1.15285	0.0312407
B3KM48			cDNA FLJ10286 fis, clone HEMBB1001384, highly similar to COP9 signalosome complex subunit 4 OS=Homo sapiens PE=2 SV=1	52.9557	15	27	15	406	46.226	5.83	106.8	106.2	108.2	93.3	88.4	97	107.067	92.9	1.15249	0.00521258
P78330		PSPH	Phosphoserine phosphatase OS=Homo sapiens GN=PSPH PE=1 SV=2	44.4444	5	6	5	225	24.992	5.69	98.2	112.8	110.3	80.8	92.1	105.9	107.1	92.9333	1.15244	0.172635
J3KNE7		TPD52L1	Tumor protein D53 OS=Homo sapiens GN=TPD52L1 PE=1 SV=1	30.622	4	5	4	209	22.985	6.01	106.9	103	111.4	87.8	93.1	97.9	107.1	92.9333	1.15244	0.0202346
O95359		TACC2	Transforming acidic coiled-coil-containing protein 2 OS=Homo sapiens GN=TACC2 PE=1 SV=3	1.1194	3	4	2	2948	309.237	4.79	114.4	102.2	104.7	93.8	98.9	86.1	107.1	92.9333	1.15244	0.0545186
A0A1U9X8E2			Proteasome subunit beta type OS=Homo sapiens PE=3 SV=1	33.79	5	6	5	219	23.23	5.02	100.1	120.3	100.9	83.7	93	102.1	107.1	92.9333	1.15244	0.16993
P46779		RPL28	60S ribosomal protein L28 OS=Homo sapiens GN=RPL28 PE=1 SV=3	64.2336	14	45	14	137	15.738	12.02	105.9	107.8	107.6	101.4	90.2	87.2	107.1	92.9333	1.15244	0.0314615
Q8N1G4		LRRC47	Leucine-rich repeat-containing protein 47 OS=Homo sapiens GN=LRRC47 PE=1 SV=1	26.072	13	21	13	583	63.434	8.28	107.2	104.1	109.9	83.6	98.8	96.4	107.067	92.9333	1.15208	0.0476842
Q9NRW1		RAB6B	Ras-related protein Rab-6B OS=Homo sapiens GN=RAB6B PE=1 SV=1	39.4231	10	28	3	208	23.447	5.53	103	111.3	106.9	99.1	82.7	97	107.067	92.9333	1.15208	0.0677026
Q9H4A5		GOLPH3L	Golgi phosphoprotein 3-like OS=Homo sapiens GN=GOLPH3L PE=1 SV=1	15.4386	3	4	1	285	32.747	5.83	108.9	100.5	111.8	91.4	90.9	96.5	107.067	92.9333	1.15208	0.0210466
A0A087X211		KIAA1524	Protein CIP2A OS=Homo sapiens GN=KIAA1524 PE=1 SV=1	2.98013	2	2	2	906	102.218	6.23	112.3	99.6	109.3	81.7	87.9	109.2	107.067	92.9333	1.15208	0.198008
B3KMB1			Structural maintenance of chromosomes protein OS=Homo sapiens PE=2 SV=1	29.6575	29	42	29	1197	135.517	8.43	109.8	101.2	110.2	86.2	91.5	101.2	107.067	92.9667	1.15167	0.0558551
Q13616		CUL1	Cullin-1 OS=Homo sapiens GN=CUL1 PE=1 SV=2	28.866	19	34	19	776	89.622	8	108.8	102.9	109.4	88.6	92.6	97.7	107.033	92.9667	1.15131	0.0137337
Q96PU4		UHRF2	E3 ubiquitin-protein ligase UHRF2 OS=Homo sapiens GN=UHRF2 PE=1 SV=1	3.49127	3	4	2	802	89.928	8.21	114	103.9	103.2	92.7	99.7	86.5	107.033	92.9667	1.15131	0.0528953
P26045		PTPN3	Tyrosine-protein phosphatase non-receptor type 3 OS=Homo sapiens GN=PTPN3 PE=1 SV=2	1.31435	1	1	1	913	103.924	7.03	99.8	118.8	102.5	91.9	84.8	102.2	107.033	92.9667	1.15131	0.145395
P33316		DUT	Deoxyuridine 5'-triphosphate nucleotidohydrolase, mitochondrial OS=Homo sapiens GN=DUT PE=1 SV=4	42.4603	8	22	8	252	26.547	9.36	107.9	108.3	104.8	86.7	94.5	97.7	107	92.9667	1.15095	0.0152353
O15511		ARPC5	Actin-related protein 2/3 complex subunit 5 OS=Homo sapiens GN=ARPC5 PE=1 SV=3	62.2517	6	15	5	151	16.31	5.67	104.7	109.6	106.7	93.3	87.1	98.5	107	92.9667	1.15095	0.0173929
Q8N726		CDKN2A	Tumor suppressor ARF OS=Homo sapiens GN=CDKN2A PE=1 SV=2	33.3333	4	4	2	132	13.895	12.41	108	109.6	103.5	102.1	90.5	86.4	107.033	93	1.1509	0.0496959
Q00839		HNRNPU	Heterogeneous nuclear ribonucleoprotein U OS=Homo sapiens GN=HNRNPU PE=1 SV=6	46.9091	44	172	1	825	90.528	6	113.7	109.2	98.1	129.6	67.7	81.7	107	93	1.15054	0.508498
A0A024R0X0		AP1GBP1	AP1 gamma subunit binding protein 1, isoform CRA_d OS=Homo sapiens GN=AP1GBP1 PE=4 SV=1	3.72907	3	3	3	1314	140.552	5.03	99.1	112.4	109.5	83.5	85.5	110	107	93	1.15054	0.211734
Q5T0F9		CC2D1B	Coiled-coil and C2 domain-containing protein 1B OS=Homo sapiens GN=CC2D1B PE=1 SV=1	1.1655	1	1	1	858	94.166	5.26	98.2	111.3	111.5	98.7	85.1	95.2	107	93	1.15054	0.0799218
Q8TF74		WIPF2	WAS/WASL-interacting protein family member 2 OS=Homo sapiens GN=WIPF2 PE=1 SV=1	4.09091	1	2	1	440	46.26	10.93	99.1	119.1	102.8	82.9	89	107.1	107	93	1.15054	0.215184
Q8N8N7		PTGR2	Prostaglandin reductase 2 OS=Homo sapiens GN=PTGR2 PE=1 SV=1	2.849	1	1	1	351	38.474	5.41	103.1	113.7	104.2	100	85.5	93.5	107	93	1.15054	0.0598005
O75116		ROCK2	Rho-associated protein kinase 2 OS=Homo sapiens GN=ROCK2 PE=1 SV=4	2.88184	4	4	3	1388	160.799	6.02	118.8	105.6	96.5	90.7	83.8	104.6	106.967	93.0333	1.14977	0.192763
Q96GY3		LIN37	Protein lin-37 homolog OS=Homo sapiens GN=LIN37 PE=1 SV=1	7.31707	1	1	1	246	28.365	8.7	107.2	103.5	110.2	88.8	74.5	115.8	106.967	93.0333	1.14977	0.319316
O95817		BAG3	BAG family molecular chaperone regulator 3 OS=Homo sapiens GN=BAG3 PE=1 SV=3	34.2609	11	14	11	575	61.557	6.95	106.5	104.8	109.6	97.2	83.9	98.1	106.967	93.0667	1.14936	0.0443276
A0A024RDG1		VDP	Vesicle docking protein p115, isoform CRA_a OS=Homo sapiens GN=VDP PE=4 SV=1	29.3139	23	39	23	962	107.828	4.91	106.4	104.5	109.9	87.9	93.1	98.2	106.933	93.0667	1.149	0.0146435
Q86UE8		TLK2	Serine/threonine-protein kinase tousled-like 2 OS=Homo sapiens GN=TLK2 PE=1 SV=2	5.44041	4	5	2	772	87.606	8.41	116.4	100.5	103.9	89.2	84.8	105.2	106.933	93.0667	1.149	0.152482
E7ESA6		PTK2	Focal adhesion kinase 1 OS=Homo sapiens GN=PTK2 PE=1 SV=1	11.4051	8	9	7	1096	124.003	6.62	100.8	113.8	106.2	88.4	89.2	101.6	106.933	93.0667	1.149	0.0717258
A0A024RDE8		PDLIM5	PDZ and LIM domain 5, isoform CRA_c OS=Homo sapiens GN=PDLIM5 PE=4 SV=1	7.38255	2	3	2	596	63.935	8.21	98.6	115.1	107.1	93.4	91.8	94	106.933	93.0667	1.149	0.0448531
A0A024RDQ9		SLC7A1	Solute carrier family 7 (Cationic amino acid transporter, y+ system), member 1, isoform CRA_a OS=Homo sapiens GN=SLC7A1 PE=4 SV=1	3.33863	2	2	2	629	67.594	5.43	102.8	124.3	93.7	105.7	80.4	93.1	106.933	93.0667	1.149	0.299628
P33552		CKS2	Cyclin-dependent kinases regulatory subunit 2 OS=Homo sapiens GN=CKS2 PE=1 SV=1	24.0506	2	4	2	79	9.854	8.46	114.9	99.1	106.8	89	88.7	101.6	106.933	93.1	1.14859	0.0907549
Q9P265		DIP2B	Disco-interacting protein 2 homolog B OS=Homo sapiens GN=DIP2B PE=1 SV=3	7.48731	9	11	9	1576	171.382	8.09	104.6	109.3	106.9	86.3	89.4	103.6	106.933	93.1	1.14859	0.0655627
V9HWD9		HEL107	Epididymis luminal protein 107 OS=Homo sapiens GN=HEL107 PE=2 SV=1	71.9101	38	139	38	623	67.835	7.66	107.6	105.5	107.7	84.3	96.7	98.3	106.933	93.1	1.14859	0.0367003
B2R5U3		EHD1	EH-domain containing 1, isoform CRA_b OS=Homo sapiens GN=EHD1 PE=2 SV=1	51.3109	19	34	18	534	60.589	6.83	103.4	110.1	107.3	86	97.4	95.9	106.933	93.1	1.14859	0.027305
A2A3R6		RPS6	40S ribosomal protein S6 OS=Homo sapiens GN=RPS6 PE=2 SV=1	51.004	18	55	18	249	28.663	10.84	106.9	103.1	110.7	103.5	88	87.8	106.9	93.1	1.14823	0.0708257
Q9UJC3		HOOK1	Protein Hook homolog 1 OS=Homo sapiens GN=HOOK1 PE=1 SV=2	6.45604	4	5	4	728	84.595	5.15	105.4	112.1	103.2	83.7	91.3	104.3	106.9	93.1	1.14823	0.104088
O00429		DNM1L	Dynamin-1-like protein OS=Homo sapiens GN=DNM1L PE=1 SV=2	43.6141	25	38	2	736	81.826	6.81	100.8	106.6	113.2	88.9	94.1	96.3	106.867	93.1	1.14787	0.0305764
Q9UHB9		SRP68	Signal recognition particle subunit SRP68 OS=Homo sapiens GN=SRP68 PE=1 SV=2	45.7735	27	59	27	627	70.686	8.56	103.9	105.2	111.6	91.4	91.7	96.3	106.9	93.1333	1.14782	0.00855998
P10644		PRKAR1A	cAMP-dependent protein kinase type I-alpha regulatory subunit OS=Homo sapiens GN=PRKAR1A PE=1 SV=1	26.5092	10	14	10	381	42.955	5.35	108.7	103.2	108.8	94.5	86.6	98.3	106.9	93.1333	1.14782	0.0244551
D3DSW3		PROSC	Proline synthetase co-transcribed homolog (Bacterial), isoform CRA_b OS=Homo sapiens GN=PROSC PE=3 SV=1	30	8	18	8	310	34.02	8.43	101.7	108.3	110.6	88	94.1	97.3	106.867	93.1333	1.14746	0.022765
P61081		UBE2M	NEDD8-conjugating enzyme Ubc12 OS=Homo sapiens GN=UBE2M PE=1 SV=1	35.5191	6	12	6	183	20.887	7.69	102.1	111.2	107.3	92.9	93.5	93	106.867	93.1333	1.14746	0.00652816
Q96EM0		L3HYPDH	Trans-3-hydroxy-L-proline dehydratase OS=Homo sapiens GN=L3HYPDH PE=1 SV=2	4.80226	1	2	1	354	38.113	6.68	105.6	107.5	107.5	83.9	95.1	100.4	106.867	93.1333	1.14746	0.0488083
Q9NR31		SAR1A	GTP-binding protein SAR1a OS=Homo sapiens GN=SAR1A PE=1 SV=1	66.6667	12	45	8	198	22.353	6.68	102	107.8	110.7	90.3	89.3	99.8	106.833	93.1333	1.1471	0.0312838
A0A024RBV2		AACS	Acetoacetyl-CoA synthetase, isoform CRA_b OS=Homo sapiens GN=AACS PE=4 SV=1	10.5655	6	7	6	672	75.096	6.24	102.3	103.8	114.4	87.9	93	98.5	106.833	93.1333	1.1471	0.0486045
Q9H0K6		PUS7L	Pseudouridylate synthase 7 homolog-like protein OS=Homo sapiens GN=PUS7L PE=1 SV=1	1.99715	1	1	1	701	80.649	7.56	104.8	113.8	102	97	80	102.5	106.867	93.1667	1.14705	0.14783
P62310		LSM3	U6 snRNA-associated Sm-like protein LSm3 OS=Homo sapiens GN=LSM3 PE=1 SV=2	32.3529	2	3	2	102	11.838	4.7	111.1	107.8	101.7	89.7	95.9	93.9	106.867	93.1667	1.14705	0.0143064
B3KWK2			Lipase maturation factor OS=Homo sapiens PE=2 SV=1	2	1	2	1	350	40.124	9.09	120.1	104.3	96.2	103.2	90.4	85.9	106.867	93.1667	1.14705	0.191403
P34896		SHMT1	Serine hydroxymethyltransferase, cytosolic OS=Homo sapiens GN=SHMT1 PE=1 SV=1	32.2981	12	29	6	483	53.049	7.71	100.4	110.4	109.7	90.1	90.1	99.3	106.833	93.1667	1.14669	0.0372219
Q9UNE7		STUB1	E3 ubiquitin-protein ligase CHIP OS=Homo sapiens GN=STUB1 PE=1 SV=2	43.5644	12	17	12	303	34.834	5.87	103.9	110.7	105.9	93	88.3	98.2	106.833	93.1667	1.14669	0.0174605
B2RBI2			cDNA, FLJ95525, highly similar to Homo sapiens synapse associated protein 1, SAP47 homolog (Drosophila) (SYAP1), mRNA OS=Homo sapiens PE=2 SV=1	50.8523	9	26	9	352	39.881	4.53	106.9	101.1	112.5	93.1	91.7	94.7	106.833	93.1667	1.14669	0.0159204
B4DN80			Peptidyl-prolyl cis-trans isomerase OS=Homo sapiens PE=2 SV=1	22.695	4	12	4	282	33.014	9.26	100.7	110.2	109.6	92.9	94.5	92.1	106.833	93.1667	1.14669	0.0122867
Q8IZ81		ELMOD2	ELMO domain-containing protein 2 OS=Homo sapiens GN=ELMOD2 PE=1 SV=1	13.6519	4	5	4	293	34.938	8.05	110	105.5	105	108.1	85.6	85.8	106.833	93.1667	1.14669	0.147921
B3KMQ6			cDNA FLJ12172 fis, clone MAMMA1000684, highly similar to Opioid growth factor receptor OS=Homo sapiens PE=2 SV=1	10.4874	5	6	5	677	73.324	4.84	109.3	107	104.2	87.5	84.7	107.3	106.833	93.1667	1.14669	0.133062
A8K486			Peptidyl-prolyl cis-trans isomerase OS=Homo sapiens PE=2 SV=1	75.7576	14	168	14	165	18.002	6.9	101.9	106.9	111.6	83.5	100.1	95.9	106.8	93.1667	1.14633	0.0755729
A0A024R2W3		PRKAR2A	Protein kinase cAMP-dependent regulatory type II alpha isoform 2 OS=Homo sapiens GN=PRKAR2A PE=2 SV=1	53.9604	19	32	17	404	45.49	5.07	108.3	106.9	105.2	94.9	89.7	94.9	106.8	93.1667	1.14633	0.00220792
B3KR33			cDNA FLJ33589 fis, clone BRAMY2012536, highly similar to Homo sapiens asparaginase like 1 (ASRGL1), mRNA OS=Homo sapiens PE=2 SV=1	43.8312	8	9	8	308	32.076	6.1	100.3	109.6	110.5	88.1	90.9	100.5	106.8	93.1667	1.14633	0.0518183
Q9H444		CHMP4B	Charged multivesicular body protein 4b OS=Homo sapiens GN=CHMP4B PE=1 SV=1	33.9286	7	15	7	224	24.935	4.82	101.6	110.7	108.1	91.5	90.6	97.4	106.8	93.1667	1.14633	0.0167208
P55210		CASP7	Caspase-7 OS=Homo sapiens GN=CASP7 PE=1 SV=1	7.92079	2	2	2	303	34.255	6.07	102.7	108.7	109	86.6	91.2	101.7	106.8	93.1667	1.14633	0.050195
P46736		BRCC3	Lys-63-specific deubiquitinase BRCC36 OS=Homo sapiens GN=BRCC3 PE=1 SV=2	13.6076	3	4	3	316	36.049	5.92	112.4	103.8	104.3	85.9	95.6	98.1	106.833	93.2	1.14628	0.0426999
B4DPV7			cDNA FLJ54534, highly similar to Homo sapiens cysteinyl-tRNA synthetase (CARS), transcript variant 3, mRNA OS=Homo sapiens PE=2 SV=1	21.8789	14	17	14	809	91.96	7.08	101	111.1	108.3	78.7	91.9	109	106.8	93.2	1.14592	0.216379
Q5VW38		GPR107	Protein GPR107 OS=Homo sapiens GN=GPR107 PE=1 SV=1	4.5	2	2	2	600	66.948	7.24	105.3	120.9	94.2	92	88.7	98.9	106.8	93.2	1.14592	0.17692
H3BPA8		PLEKHG4	Puratrophin-1 (Fragment) OS=Homo sapiens GN=PLEKHG4 PE=1 SV=1	20.7547	1	1	1	106	11.287	4.67	51.5	158	110.9	90	69.3	120.3	106.8	93.2	1.14592	0.71108
P84098		RPL19	60S ribosomal protein L19 OS=Homo sapiens GN=RPL19 PE=1 SV=1	31.6327	9	48	9	196	23.451	11.47	108.8	103	108.5	97.1	89.7	92.8	106.767	93.2	1.14557	0.00897136
Q9NSV4		DIAPH3	Protein diaphanous homolog 3 OS=Homo sapiens GN=DIAPH3 PE=1 SV=4	4.02347	4	4	3	1193	136.839	7.03	115.1	101.9	103.3	81.9	99.1	98.6	106.767	93.2	1.14557	0.125973
Q5T200		ZC3H13	Zinc finger CCCH domain-containing protein 13 OS=Homo sapiens GN=ZC3H13 PE=1 SV=1	3.05755	4	4	4	1668	196.519	9.42	100.7	118.8	100.9	97.8	87.7	94.2	106.8	93.2333	1.14551	0.112428
Q59EA2			Coronin (Fragment) OS=Homo sapiens PE=2 SV=1	51.8962	24	51	24	501	56.334	8.19	107.9	106.1	106.3	107.5	82.7	89.5	106.767	93.2333	1.14516	0.142247
V9HW91		HEL-S-8a	Epididymis secretory sperm binding protein Li 8a OS=Homo sapiens GN=HEL-S-8a PE=2 SV=1	51.4493	12	18	12	276	30.589	7.21	105.7	107.3	107.3	89.2	90.5	100	106.767	93.2333	1.14516	0.0171361
Q9UNL2		SSR3	Translocon-associated protein subunit gamma OS=Homo sapiens GN=SSR3 PE=1 SV=1	11.8919	2	5	2	185	21.067	9.61	106	109.8	104.5	113.4	83.8	82.5	106.767	93.2333	1.14516	0.255754
P30043		BLVRB	Flavin reductase (NADPH) OS=Homo sapiens GN=BLVRB PE=1 SV=3	35.4369	5	8	5	206	22.105	7.65	98.6	113.9	107.8	75.4	100.9	103.4	106.767	93.2333	1.14516	0.246984
Q9BW61		DDA1	DET1- and DDB1-associated protein 1 OS=Homo sapiens GN=DDA1 PE=1 SV=1	11.7647	1	2	1	102	11.828	8.68	111.2	102.3	106.8	95.3	79.8	104.7	106.767	93.2667	1.14475	0.154462
Q9BRX9		WDR83	WD repeat domain-containing protein 83 OS=Homo sapiens GN=WDR83 PE=1 SV=1	4.7619	1	1	1	315	34.321	5.58	107.7	103.1	109.5	86.6	92.7	100.5	106.767	93.2667	1.14475	0.038668
R4GMR5		PSMD8	26S proteasome non-ATPase regulatory subunit 8 OS=Homo sapiens GN=PSMD8 PE=1 SV=1	52.9617	10	48	10	287	32.531	7.31	107.7	105.4	107.1	82.5	93.8	103.5	106.733	93.2667	1.14439	0.0921258
B2RDN3		NUBP2	Cytosolic Fe-S cluster assembly factor NUBP2 OS=Homo sapiens GN=NUBP2 PE=2 SV=1	25.0923	3	7	3	271	28.865	5.83	102.3	106.8	111.1	80.8	96.4	102.6	106.733	93.2667	1.14439	0.125316
J3KPD3		RBM7	RNA binding motif protein 7, isoform CRA_c OS=Homo sapiens GN=RBM7 PE=1 SV=1	12.7341	3	3	3	267	30.572	9.57	106.2	110.2	103.8	96.9	92.3	90.6	106.733	93.2667	1.14439	0.00707748
Q9H1C4		UNC93B1	Protein unc-93 homolog B1 OS=Homo sapiens GN=UNC93B1 PE=1 SV=2	2.01005	1	1	1	597	66.588	6.96	108.8	107.8	103.6	104.5	77.7	97.6	106.733	93.2667	1.14439	0.175487
V9HWE9		HEL-S-22	Epididymis secretory protein Li 22 OS=Homo sapiens GN=HEL-S-22 PE=2 SV=1	70	14	105	14	210	23.341	5.64	100.3	109.7	110.2	77.4	99.1	103.3	106.733	93.2667	1.14439	0.194386
Q8WW01		TSEN15	tRNA-splicing endonuclease subunit Sen15 OS=Homo sapiens GN=TSEN15 PE=1 SV=1	9.35673	1	1	1	171	18.629	4.58	111.3	110.7	98.2	90.4	99.6	89.8	106.733	93.2667	1.14439	0.0645421
Q8WZ73		RFFL	E3 ubiquitin-protein ligase rififylin OS=Homo sapiens GN=RFFL PE=1 SV=1	7.43802	1	1	1	363	40.487	5.48	90.3	114.6	115.3	93.5	91.9	94.4	106.733	93.2667	1.14439	0.178014
A0A024R718		PBEF1	Pre-B-cell colony enhancing factor 1, isoform CRA_a OS=Homo sapiens GN=PBEF1 PE=4 SV=1	56.4155	20	41	20	491	55.487	7.15	102.5	104.3	113.3	79	97.2	103.6	106.7	93.2667	1.14403	0.172179
Q13451		FKBP5	Peptidyl-prolyl cis-trans isomerase FKBP5 OS=Homo sapiens GN=FKBP5 PE=1 SV=2	21.8818	7	9	7	457	51.18	5.9	108.4	105.8	106	90.1	92	97.8	106.733	93.3	1.14398	0.00548319
P62979		RPS27A	Ubiquitin-40S ribosomal protein S27a OS=Homo sapiens GN=RPS27A PE=1 SV=2	52.5641	11	90	3	156	17.953	9.64	105.9	106.9	107.3	101.7	87.7	90.5	106.7	93.3	1.14362	0.0355869
Q5HYL6		DKFZp686E1899	Putative uncharacterized protein DKFZp686E1899 OS=Homo sapiens GN=DKFZp686E1899 PE=2 SV=1	53.4091	14	19	12	352	39.53	5.19	102.8	107.9	109.4	88.3	90.6	101	106.7	93.3	1.14362	0.0378843
Q7Z422		SZRD1	SUZ domain-containing protein 1 OS=Homo sapiens GN=SZRD1 PE=1 SV=1	21.7105	2	2	2	152	16.987	8.95	100.9	107.5	111.7	93.8	86.8	99.3	106.7	93.3	1.14362	0.0489949
P35680		HNF1B	Hepatocyte nuclear factor 1-beta OS=Homo sapiens GN=HNF1B PE=1 SV=1	2.51346	1	1	1	557	61.285	7.77	116.3	104.2	99.6	121	68.7	90.2	106.7	93.3	1.14362	0.448734
O60701		UGDH	UDP-glucose 6-dehydrogenase OS=Homo sapiens GN=UGDH PE=1 SV=1	70.6478	24	46	24	494	54.989	7.12	105.6	105.8	108.7	81.2	98.4	100.3	106.7	93.3	1.14362	0.0951222
Q9BQS8		FYCO1	FYVE and coiled-coil domain-containing protein 1 OS=Homo sapiens GN=FYCO1 PE=1 SV=3	12.5169	11	14	11	1478	166.879	4.92	106.2	106.3	107.5	91.5	94.7	93.7	106.667	93.3	1.14327	0.000206021
B3KT93			Polyadenylate-binding protein OS=Homo sapiens PE=2 SV=1	47.956	33	110	10	636	70.571	9.52	105.9	98.7	115.4	95.2	90.9	93.8	106.667	93.3	1.14327	0.0555853
Q9NWH9		SLTM	SAFB-like transcription modulator OS=Homo sapiens GN=SLTM PE=1 SV=2	11.412	10	13	10	1034	117.079	7.87	108.8	104.8	106.4	101.2	87.4	91.4	106.667	93.3333	1.14286	0.0352123
B3KML1			cDNA FLJ11308 fis, clone PLACE1010074, highly similar to Sorting nexin-2 OS=Homo sapiens PE=2 SV=1	31.0212	14	19	12	519	58.436	5.06	106.4	104.7	108.9	88.8	94.5	96.7	106.667	93.3333	1.14286	0.00733783
Q8WVY7		UBLCP1	Ubiquitin-like domain-containing CTD phosphatase 1 OS=Homo sapiens GN=UBLCP1 PE=1 SV=2	12.5786	3	4	3	318	36.781	6.46	103.5	111.4	105.1	84.4	92.8	102.8	106.667	93.3333	1.14286	0.0844758
O15066		KIF3B	Kinesin-like protein KIF3B OS=Homo sapiens GN=KIF3B PE=1 SV=1	5.08701	3	3	2	747	85.073	7.69	101.7	104.2	114.1	85.6	94.3	100.1	106.667	93.3333	1.14286	0.078194
A8K3X2		TARBP2	RISC-loading complex subunit TARBP2 OS=Homo sapiens GN=TARBP2 PE=2 SV=1	8.19672	3	3	3	366	38.989	6.54	105.9	103.6	110.5	96.8	82	101.2	106.667	93.3333	1.14286	0.096073
Q86X55		CARM1	Histone-arginine methyltransferase CARM1 OS=Homo sapiens GN=CARM1 PE=1 SV=3	29.1118	12	17	12	608	65.811	6.73	106.3	105.1	108.5	86.7	90.8	102.5	106.633	93.3333	1.1425	0.0514007
Q9Y263		PLAA	Phospholipase A-2-activating protein OS=Homo sapiens GN=PLAA PE=1 SV=2	28.3019	16	23	16	795	87.101	6.37	105.6	106.1	108.3	81.2	99.1	99.8	106.667	93.3667	1.14245	0.096338
X5CMJ9		PSM8	Proteasome subunit beta type OS=Homo sapiens GN=PSM8 PE=3 SV=1	51.8116	9	12	9	276	30.335	7.43	102.5	111.9	105.6	90.3	92.9	96.9	106.667	93.3667	1.14245	0.0168056
O60869		EDF1	Endothelial differentiation-related factor 1 OS=Homo sapiens GN=EDF1 PE=1 SV=1	48.6486	9	16	9	148	16.359	9.95	102.6	110.1	107.2	92.3	91.6	96.2	106.633	93.3667	1.14209	0.0070722
Q496Y1		C10orf118	C10orf118 protein (Fragment) OS=Homo sapiens GN=C10orf118 PE=2 SV=1	1.09562	1	1	1	1004	115.815	6.87	101.7	101.5	116.7	79.4	79.6	121.1	106.633	93.3667	1.14209	0.419334
A0A1K0GXZ1		GLNC1	Globin C1 OS=Homo sapiens GN=GLNC1 PE=3 SV=1	27.6836	5	15	5	177	19.22	9.77	119.3	92.5	108	119.9	76	84.2	106.6	93.3667	1.14174	0.442835
Q92879		CELF1	CUGBP Elav-like family member 1 OS=Homo sapiens GN=CELF1 PE=1 SV=2	30.6584	12	28	1	486	52.03	8.46	99.9	118.2	101.8	97.7	90.4	92.1	106.633	93.4	1.14168	0.100245
D3DUP1		WNK1	WNK lysine deficient protein kinase 1, isoform CRA_b OS=Homo sapiens GN=WNK1 PE=4 SV=1	4.61797	8	10	8	2382	250.602	6.34	103.4	110.1	106.3	81.4	94.5	104.3	106.6	93.4	1.14133	0.12876
Q5VWU8		PARD3	Partitioning defective 3 homolog OS=Homo sapiens GN=PARD3 PE=1 SV=1	23.4765	18	26	3	1001	109.932	6.6	109.8	102.9	107.1	89.6	88.5	102.1	106.6	93.4	1.14133	0.0514164
E9PGZ1		CALD1	Caldesmon OS=Homo sapiens GN=CALD1 PE=1 SV=1	43.6567	17	36	17	536	61.669	6.11	107.9	103.5	108.4	92.4	85.4	102.4	106.6	93.4	1.14133	0.0631803
P26373		RPL13	60S ribosomal protein L13 OS=Homo sapiens GN=RPL13 PE=1 SV=4	57.346	14	42	14	211	24.247	11.65	104.3	106.6	108.9	101.8	88.4	90	106.6	93.4	1.14133	0.0407264
B2R5M8			Isocitrate dehydrogenase [NADP] OS=Homo sapiens PE=2 SV=1	59.6618	21	53	20	414	46.619	7.01	103.3	104.4	112.1	79.7	100.1	100.4	106.6	93.4	1.14133	0.148554
Q96G28		CFAP36	Cilia- and flagella-associated protein 36 OS=Homo sapiens GN=CFAP36 PE=1 SV=2	5.55556	1	1	1	342	39.422	4.97	96.6	98.3	124.9	76.7	93.4	110.1	106.6	93.4	1.14133	0.377186
B3KP90			cDNA FLJ31447 fis, clone NT2NE2000913, highly similar to Protein phosphatase 2C isoform beta (EC 3.1.3.16) OS=Homo sapiens PE=2 SV=1	17.3278	5	8	5	479	52.676	5.05	104	109	106.7	80.8	87.9	111.5	106.567	93.4	1.14097	0.233534
A4D1U4		LCHN	Protein LCHN OS=Homo sapiens GN=LCHN PE=1 SV=1	1.75824	1	1	1	455	51.413	5.31	85.9	136.6	97.2	87.2	80.8	112.2	106.567	93.4	1.14097	0.507435
O95801		TTC4	Tetratricopeptide repeat protein 4 OS=Homo sapiens GN=TTC4 PE=1 SV=3	6.20155	1	2	1	387	44.65	5.6	104.1	101.8	113.9	86.6	87.6	106.1	106.6	93.4333	1.14092	0.147528
P06737		PYGL	Glycogen phosphorylase, liver form OS=Homo sapiens GN=PYGL PE=1 SV=4	47.5797	35	70	29	847	97.087	7.17	105.4	101.6	112.7	83.5	94.4	102.4	106.567	93.4333	1.14056	0.108338
K7EJH8		ACTN4	Alpha-actinin-4 (Fragment) OS=Homo sapiens GN=ACTN4 PE=1 SV=1	64.8352	13	46	1	182	21.417	6.7	101.5	108.5	109.7	79.4	97	103.9	106.567	93.4333	1.14056	0.164508
Q86TI2		DPP9	Dipeptidyl peptidase 9 OS=Homo sapiens GN=DPP9 PE=1 SV=3	20.8575	12	18	12	863	98.201	6.46	103.5	103.7	112.5	88.9	92.2	99.2	106.567	93.4333	1.14056	0.0364552
Q14693		LPIN1	Phosphatidate phosphatase LPIN1 OS=Homo sapiens GN=LPIN1 PE=1 SV=2	7.52809	3	7	3	890	98.602	6.58	100.2	112.3	107.2	87.4	87.6	105.3	106.567	93.4333	1.14056	0.129429
A0A024R152		hCG_28765	HCG28765, isoform CRA_b OS=Homo sapiens GN=hCG_28765 PE=4 SV=1	6.5819	5	5	5	1337	147.137	5.01	108.4	107.5	103.8	88.6	88.9	102.8	106.567	93.4333	1.14056	0.0549319
R4GMX8		RANBP10	Ran-binding protein 10 OS=Homo sapiens GN=RANBP10 PE=1 SV=1	9.23077	4	5	3	650	70.441	6.87	105.2	107.6	106.9	89.8	85	105.5	106.567	93.4333	1.14056	0.102763
Q9UPT5		EXOC7	Exocyst complex component 7 OS=Homo sapiens GN=EXOC7 PE=1 SV=3	11.5646	7	7	7	735	83.33	6.79	103.6	110.2	105.9	84.8	93	102.5	106.567	93.4333	1.14056	0.0741958
A8K0B5		ZBTB8OS	Protein archease OS=Homo sapiens GN=ZBTB8OS PE=1 SV=1	5.58659	1	2	1	179	20.662	4.59	96	113.3	110.4	72.4	88.6	119.3	106.567	93.4333	1.14056	0.423757
Q9H0B6		KLC2	Kinesin light chain 2 OS=Homo sapiens GN=KLC2 PE=1 SV=1	27.1704	13	14	10	622	68.892	7.15	108.8	102.4	108.4	86.5	91.6	102.3	106.533	93.4667	1.1398	0.062333
P49593		PPM1F	Protein phosphatase 1F OS=Homo sapiens GN=PPM1F PE=1 SV=3	4.40529	1	2	1	454	49.8	5.1	100.8	108.9	109.9	93.3	91.8	95.3	106.533	93.4667	1.1398	0.0128672
A8K3B6			Tyrosine-protein kinase OS=Homo sapiens PE=2 SV=1	28.8889	10	10	10	450	50.67	7.06	103.2	106.1	110.2	85.9	92.6	101.9	106.5	93.4667	1.13944	0.0617365
A0A0A0MSW4		PITPNB	Phosphatidylinositol transfer protein beta isoform OS=Homo sapiens GN=PITPNB PE=1 SV=1	47.6015	10	23	8	271	31.561	6.87	103.9	105.8	109.9	87.4	94.4	98.7	106.533	93.5	1.13939	0.0252125
P29083		GTF2E1	General transcription factor IIE subunit 1 OS=Homo sapiens GN=GTF2E1 PE=1 SV=2	20.9567	6	12	6	439	49.421	4.82	101.3	111.2	107.1	89.1	88.1	103.3	106.533	93.5	1.13939	0.0836904
P49327		FASN	Fatty acid synthase OS=Homo sapiens GN=FASN PE=1 SV=3	38.9088	72	146	72	2511	273.254	6.44	107.3	98.2	114	80.1	97.4	103	106.5	93.5	1.13904	0.191254
Q8WWQ0		PHIP	PH-interacting protein OS=Homo sapiens GN=PHIP PE=1 SV=2	13.3443	17	19	17	1821	206.56	8.85	103.8	104.8	110.9	98.6	87	94.9	106.5	93.5	1.13904	0.0332745
A1X283		SH3PXD2B	SH3 and PX domain-containing protein 2B OS=Homo sapiens GN=SH3PXD2B PE=1 SV=3	9.22064	6	8	6	911	101.516	8.69	104	105.5	110	82.1	89.3	109.1	106.5	93.5	1.13904	0.191107
O60333		KIF1B	Kinesin-like protein KIF1B OS=Homo sapiens GN=KIF1B PE=1 SV=5	4.73568	6	6	4	1816	204.349	5.6	104.3	108.6	106.6	87.7	83.9	108.9	106.5	93.5	1.13904	0.174183
A7MD96		SYNPO	SYNPO protein (Fragment) OS=Homo sapiens GN=SYNPO PE=2 SV=1	6.42616	3	6	3	887	94.653	9.74	104	111.3	104.2	86.9	84.6	109	106.5	93.5	1.13904	0.185511
Q86X10		RALGAPB	Ral GTPase-activating protein subunit beta OS=Homo sapiens GN=RALGAPB PE=1 SV=1	2.74431	3	3	3	1494	166.692	6.79	110.4	104.8	104.2	92.1	95.3	93.1	106.467	93.5	1.13868	0.00406821
O15371		EIF3D	Eukaryotic translation initiation factor 3 subunit D OS=Homo sapiens GN=EIF3D PE=1 SV=1	56.0219	20	42	20	548	63.932	6.05	107.9	102.6	109	86.4	93.6	100.6	106.5	93.5333	1.13863	0.0464214
Q9UEW8		STK39	STE20/SPS1-related proline-alanine-rich protein kinase OS=Homo sapiens GN=STK39 PE=1 SV=3	12.844	6	7	4	545	59.436	6.29	105.7	108.5	105.3	88.1	92.4	100.1	106.5	93.5333	1.13863	0.0237789
O00268		TAF4	Transcription initiation factor TFIID subunit 4 OS=Homo sapiens GN=TAF4 PE=1 SV=2	4.60829	3	3	3	1085	110.047	9.94	107.6	103.9	108	94.2	89.6	96.8	106.5	93.5333	1.13863	0.00636067
P61011		SRP54	Signal recognition particle 54 kDa protein OS=Homo sapiens GN=SRP54 PE=1 SV=1	42.4603	16	30	16	504	55.668	8.75	103	107.9	108.5	85.8	94	100.8	106.467	93.5333	1.13828	0.0504576
P61513		RPL37A	60S ribosomal protein L37a OS=Homo sapiens GN=RPL37A PE=1 SV=2	59.7826	7	28	7	92	10.268	10.43	109.1	106	104.3	106.1	87.6	86.9	106.467	93.5333	1.13828	0.115094
P28070		PSMB4	Proteasome subunit beta type-4 OS=Homo sapiens GN=PSMB4 PE=1 SV=4	50.3788	8	29	8	264	29.185	5.97	102.1	110.6	106.7	84	104.3	92.3	106.467	93.5333	1.13828	0.112738
P51511		MMP15	Matrix metalloproteinase-15 OS=Homo sapiens GN=MMP15 PE=1 SV=1	12.2571	5	7	5	669	75.759	7.46	113.6	105.7	100.1	93.1	91.6	95.9	106.467	93.5333	1.13828	0.034714
A2RUM7		RPL5	Ribosomal protein L5 OS=Homo sapiens GN=RPL5 PE=2 SV=1	59.9327	20	110	20	297	34.341	9.72	107.3	103.6	108.4	99.1	90.3	91.2	106.433	93.5333	1.13792	0.0149103
P50579		METAP2	Methionine aminopeptidase 2 OS=Homo sapiens GN=METAP2 PE=1 SV=1	46.6527	16	48	2	478	52.858	5.82	105.1	103.3	110.9	90.9	90.5	99.2	106.433	93.5333	1.13792	0.02407
A0A024RAN2		CAST	Calpastatin, isoform CRA_a OS=Homo sapiens GN=CAST PE=4 SV=1	38.3562	21	28	1	803	86.561	5.14	118.8	110	90.5	74.8	79.9	126	106.433	93.5667	1.13751	0.520868
P98171		ARHGAP4	Rho GTPase-activating protein 4 OS=Homo sapiens GN=ARHGAP4 PE=1 SV=2	2.64271	2	2	2	946	104.96	6.34	120	109	90.3	83.4	96.5	100.8	106.433	93.5667	1.13751	0.272724
P86790		CCZ1B	Vacuolar fusion protein CCZ1 homolog B OS=Homo sapiens GN=CCZ1B PE=1 SV=1	17.4274	6	8	6	482	55.83	6.48	111	105.7	102.6	91.3	92	97.4	106.433	93.5667	1.13751	0.0145518
P32929		CTH	Cystathionine gamma-lyase OS=Homo sapiens GN=CTH PE=1 SV=3	2.22222	1	1	1	405	44.479	6.7	107.6	108	103.6	87	87.7	106	106.4	93.5667	1.13716	0.114464
B7SBB1		AIP	Peptidylprolyl isomerase OS=Homo sapiens GN=AIP PE=4 SV=1	20.9726	5	7	5	329	37.477	6.54	106.4	103.6	109.3	90.4	92.9	97.5	106.433	93.6	1.13711	0.00840129
B2RDE8			cDNA, FLJ96580, highly similar to Homo sapiens hepatoma-derived growth factor (high-mobility group protein 1-like) (HDGF), mRNA OS=Homo sapiens PE=2 SV=1	48.75	12	34	11	240	26.789	4.67	104.2	111.6	103.4	87.9	96.3	96.6	106.4	93.6	1.13675	0.029621
P40222		TXLNA	Alpha-taxilin OS=Homo sapiens GN=TXLNA PE=1 SV=3	46.1538	17	27	17	546	61.853	6.52	107.3	101	110.9	88.7	91.4	100.7	106.4	93.6	1.13675	0.0510904
Q9Y6K9		IKBKG	NF-kappa-B essential modulator OS=Homo sapiens GN=IKBKG PE=1 SV=2	15.9905	5	5	5	419	48.167	5.71	107.1	105.6	106.5	85.2	95.8	99.8	106.4	93.6	1.13675	0.0430719
A0A024R7N6		PIK3R2	Phosphoinositide-3-kinase, regulatory subunit 2 (P85 beta), isoform CRA_a OS=Homo sapiens GN=PIK3R2 PE=4 SV=1	0.961538	1	2	1	728	81.505	6.43	108.9	116.8	93.5	81.1	96.7	103	106.4	93.6	1.13675	0.246749
A8K037			cDNA FLJ77641 OS=Homo sapiens PE=2 SV=1	5.75758	1	1	1	330	36.818	4.82	120.4	107.3	91.5	106.5	85.8	88.5	106.4	93.6	1.13675	0.293095
Q9Y3B8		REXO2	Oligoribonuclease, mitochondrial OS=Homo sapiens GN=REXO2 PE=1 SV=3	29.1139	6	11	6	237	26.816	6.87	103	109.6	106.5	91	90	99.8	106.367	93.6	1.1364	0.0249634
G5E9G6		TRIP12	E3 ubiquitin-protein ligase TRIP12 OS=Homo sapiens GN=TRIP12 PE=1 SV=1	7.67442	3	3	1	430	45.295	10.86	108.1	104.6	106.4	103.9	87.7	89.2	106.367	93.6	1.1364	0.0724223
Q15654		TRIP6	Thyroid receptor-interacting protein 6 OS=Homo sapiens GN=TRIP6 PE=1 SV=3	39.7059	10	13	10	476	50.255	7.37	111.3	105.6	102.2	98.3	87	95.5	106.367	93.6	1.1364	0.041517
P60763		RAC3	Ras-related C3 botulinum toxin substrate 3 OS=Homo sapiens GN=RAC3 PE=1 SV=1	27.0833	5	11	1	192	21.365	8.15	97.6	115.8	105.8	91.2	105	84.7	106.4	93.6333	1.13635	0.184431
A0A024RDA9		EXOC1	Exocyst complex component 1, isoform CRA_b OS=Homo sapiens GN=EXOC1 PE=4 SV=1	7.27069	5	6	5	894	101.917	6.61	107.8	104.7	106.7	88.1	91.7	101.1	106.4	93.6333	1.13635	0.0326624
Q4LE36		ACLY	ACLY variant protein (Fragment) OS=Homo sapiens GN=ACLY variant protein PE=2 SV=1	49.6042	50	133	50	1137	124.477	8.03	105.4	103.2	110.5	78.4	100.2	102.3	106.367	93.6333	1.13599	0.184079
B3KUY2		PTGES3	Prostaglandin E synthase 3 (Cytosolic), isoform CRA_c OS=Homo sapiens GN=PTGES3 PE=2 SV=1	34.5455	6	26	6	165	19.436	4.97	102.4	105	111.7	80.5	97.1	103.3	106.367	93.6333	1.13599	0.158163
Q96FJ2		DYNLL2	Dynein light chain 2, cytoplasmic OS=Homo sapiens GN=DYNLL2 PE=1 SV=1	51.6854	5	15	3	89	10.343	7.37	104.8	111.8	102.5	99.5	92.4	89	106.367	93.6333	1.13599	0.0378962
A0A024RCJ8		hCG_1821276	HCG1821276, isoform CRA_a OS=Homo sapiens GN=hCG_1821276 PE=4 SV=1	1.79445	1	1	1	613	67.902	5.4	108.9	103.9	106.3	91.6	89.9	99.4	106.367	93.6333	1.13599	0.0174843
B7ZMD6		IRGQ	IRGQ protein OS=Homo sapiens GN=IRGQ PE=2 SV=1	1.76565	1	1	1	623	62.635	4.84	105	104.6	109.5	85	96.4	99.5	106.367	93.6333	1.13599	0.0529426
Q14997		PSME4	Proteasome activator complex subunit 4 OS=Homo sapiens GN=PSME4 PE=1 SV=2	3.58112	6	7	6	1843	211.199	6.9	102.4	108.4	108.3	96.7	87.1	97.2	106.367	93.6667	1.13559	0.0296984
O15541		RNF113A	RING finger protein 113A OS=Homo sapiens GN=RNF113A PE=1 SV=1	6.70554	2	2	2	343	38.763	5.69	108.2	108.5	102.4	96.2	88.3	96.5	106.367	93.6667	1.13559	0.0190456
O00291		HIP1	Huntingtin-interacting protein 1 OS=Homo sapiens GN=HIP1 PE=1 SV=5	36.4513	28	41	26	1037	116.148	5.3	104.3	109.1	105.6	94.5	88.5	98	106.333	93.6667	1.13523	0.0153891
Q5VW32		BROX	BRO1 domain-containing protein BROX OS=Homo sapiens GN=BROX PE=1 SV=1	16.3017	4	7	4	411	46.447	7.65	100.8	110.2	108	86.6	93.7	100.7	106.333	93.6667	1.13523	0.0631364
Q9BV68		RNF126	E3 ubiquitin-protein ligase RNF126 OS=Homo sapiens GN=RNF126 PE=1 SV=1	14.1104	2	2	2	326	35.562	5.72	93.7	109.9	115.4	107.9	80.6	92.5	106.333	93.6667	1.13523	0.283776
P15927		RPA2	Replication protein A 32 kDa subunit OS=Homo sapiens GN=RPA2 PE=1 SV=1	60.7407	9	19	9	270	29.228	6.15	116.9	101.1	100.9	96.7	93.7	90.6	106.3	93.6667	1.13488	0.0864956
Q9H3P7		ACBD3	Golgi resident protein GCP60 OS=Homo sapiens GN=ACBD3 PE=1 SV=4	28.4091	9	26	9	528	60.556	5.06	101.4	107.9	109.7	91.8	91.9	97.4	106.333	93.7	1.13483	0.015602
Q8N335		GPD1L	Glycerol-3-phosphate dehydrogenase 1-like protein OS=Homo sapiens GN=GPD1L PE=1 SV=1	12.2507	3	3	3	351	38.394	7.02	102.1	112.4	104.5	90.2	95	95.9	106.333	93.7	1.13483	0.0242395
Q5T5C7		SARS	Serine--tRNA ligase, cytoplasmic OS=Homo sapiens GN=SARS PE=1 SV=1	29.291	14	25	14	536	61.274	7.06	102.2	104.3	112.4	80.8	97.2	103.1	106.3	93.7	1.13447	0.16208
Q9BW60		ELOVL1	Elongation of very long chain fatty acids protein 1 OS=Homo sapiens GN=ELOVL1 PE=1 SV=1	13.9785	3	11	3	279	32.641	9.6	104.8	111.3	102.8	106.7	84.9	89.5	106.3	93.7	1.13447	0.151198
Q53XS4		PTPN6	Tyrosine-protein phosphatase non-receptor type OS=Homo sapiens GN=PTPN6 PE=2 SV=1	12.2278	5	5	5	597	67.677	7.78	107	105	106.9	91.2	93.7	96.2	106.3	93.7	1.13447	0.00135045
Q5H9R7		PPP6R3	Serine/threonine-protein phosphatase 6 regulatory subunit 3 OS=Homo sapiens GN=PPP6R3 PE=1 SV=2	7.33104	4	4	4	873	97.608	4.6	102.8	112.1	104	83.5	95.9	101.7	106.3	93.7	1.13447	0.108221
Q9H8M2		BRD9	Bromodomain-containing protein 9 OS=Homo sapiens GN=BRD9 PE=1 SV=2	1.17253	1	1	1	597	66.958	6.19	122.6	94.4	101.9	112.8	76.8	91.5	106.3	93.7	1.13447	0.401207
A8MU27		SUMO3	Small ubiquitin-related modifier 3 OS=Homo sapiens GN=SUMO3 PE=1 SV=1	17.0068	3	9	2	147	16.946	9.67	105.4	108.9	104.5	84.9	96	100.2	106.267	93.7	1.13412	0.0574841
Q13813		SPTAN1	Spectrin alpha chain, non-erythrocytic 1 OS=Homo sapiens GN=SPTAN1 PE=1 SV=3	62.9045	132	249	132	2472	284.364	5.35	111.2	100.3	107.3	92.2	90.5	98.5	106.267	93.7333	1.13371	0.0353669
Q5VZU9		TPP2	Tripeptidyl-peptidase 2 OS=Homo sapiens GN=TPP2 PE=1 SV=1	11.9651	12	17	12	1262	139.677	6.52	104.4	110.7	103.6	89.4	92.5	99.4	106.233	93.7667	1.13295	0.028334
F8W6G1		NRBP1	Nuclear receptor-binding protein OS=Homo sapiens GN=NRBP1 PE=1 SV=1	12.523	4	4	4	543	60.792	5.16	108.1	101.6	109	74.4	102.3	104.6	106.233	93.7667	1.13295	0.279801
A0A024R2M7		OXSR1	Oxidative-stress responsive 1, isoform CRA_a OS=Homo sapiens GN=OXSR1 PE=4 SV=1	13.2827	6	9	4	527	57.986	6.43	107.8	101.1	109.8	81.5	94.6	105.2	106.233	93.7667	1.13295	0.164734
P61960		UFM1	Ubiquitin-fold modifier 1 OS=Homo sapiens GN=UFM1 PE=1 SV=1	68.2353	5	10	5	85	9.112	9.31	96.7	108.2	113.7	90.7	91.3	99.3	106.2	93.7667	1.1326	0.0955937
Q9H2G2		SLK	STE20-like serine/threonine-protein kinase OS=Homo sapiens GN=SLK PE=1 SV=1	9.47368	11	15	9	1235	142.607	5.15	107.1	104.7	106.8	80.8	98.1	102.4	106.2	93.7667	1.1326	0.134624
Q15796		SMAD2	Mothers against decapentaplegic homolog 2 OS=Homo sapiens GN=SMAD2 PE=1 SV=1	17.3448	8	11	2	467	52.273	6.58	102	109.1	107.6	91.9	90.1	99.4	106.233	93.8	1.13255	0.0253925
A0A024R2L0		UBP1	Upstream binding protein 1 (LBP-1a), isoform CRA_a OS=Homo sapiens GN=UBP1 PE=4 SV=1	12.5926	4	7	3	540	60.453	6.35	102.3	110	106.4	99.5	84.6	97.3	106.233	93.8	1.13255	0.0731769
P11216		PYGB	Glycogen phosphorylase, brain form OS=Homo sapiens GN=PYGB PE=1 SV=5	59.312	42	92	36	843	96.635	6.86	103.6	103.5	111.5	82.1	95.6	103.7	106.2	93.8	1.1322	0.143832
B4DZF2			cDNA FLJ59571, highly similar to Eukaryotic translation initiation factor 4gamma 2 OS=Homo sapiens PE=2 SV=1	38.4694	31	51	31	980	110.19	7.94	105.2	106.3	107.1	84.7	96.8	99.9	106.2	93.8	1.1322	0.0566626
A0A140VKF1			Kinesin-like protein OS=Homo sapiens PE=2 SV=1	21.2414	10	14	10	725	81.261	7.83	109.3	100.7	108.6	90.3	90.5	100.6	106.2	93.8	1.1322	0.0472319
P49207		RPL34	60S ribosomal protein L34 OS=Homo sapiens GN=RPL34 PE=1 SV=3	29.0598	5	17	5	117	13.284	11.47	109.5	103.1	106	101.8	90.8	88.8	106.2	93.8	1.1322	0.0493248
B7Z7F0			cDNA FLJ56420, highly similar to Aspartyl aminopeptidase (EC 3.4.11.21) OS=Homo sapiens PE=2 SV=1	28.1947	8	9	8	493	54.459	7.72	105.9	107.5	105.2	89.7	88.5	103.2	106.2	93.8	1.1322	0.0597873
Q8N0Z6		TTC5	Tetratricopeptide repeat protein 5 OS=Homo sapiens GN=TTC5 PE=1 SV=2	14.0909	3	6	3	440	48.897	6.48	101.9	110.6	106.1	91.2	93.9	96.3	106.2	93.8	1.1322	0.0130726
A0A0A0MQU4		SCLY	Selenocysteine lyase OS=Homo sapiens GN=SCLY PE=1 SV=1	12.5828	3	3	3	453	48.763	7.12	107.3	110.1	101.2	87.8	87.3	106.3	106.2	93.8	1.1322	0.141466
P05423		POLR3D	DNA-directed RNA polymerase III subunit RPC4 OS=Homo sapiens GN=POLR3D PE=1 SV=2	8.0402	2	2	2	398	44.368	6.98	105.3	105.8	107.5	94.5	79.8	107.2	106.2	93.8333	1.13179	0.194554
Q8N7G1			Purine nucleoside phosphorylase OS=Homo sapiens PE=2 SV=1	65.529	17	30	17	293	32.53	7.21	107.5	103	108	82.4	94.8	104.3	106.167	93.8333	1.13144	0.132242
Q00535		CDK5	Cyclin-dependent-like kinase 5 OS=Homo sapiens GN=CDK5 PE=1 SV=3	31.1644	8	15	7	292	33.283	7.66	99.7	113.3	105.5	84.1	94.7	102.7	106.167	93.8333	1.13144	0.138315
Q9Y508		RNF114	E3 ubiquitin-protein ligase RNF114 OS=Homo sapiens GN=RNF114 PE=1 SV=1	32.0175	5	8	5	228	25.677	7.25	100.1	106.3	112.1	81.4	96.9	103.2	106.167	93.8333	1.13144	0.168454
P84022		SMAD3	Mothers against decapentaplegic homolog 3 OS=Homo sapiens GN=SMAD3 PE=1 SV=1	28.9412	11	17	5	425	48.05	7.15	107.3	103.7	107.5	91	94.3	96.2	106.167	93.8333	1.13144	0.0032441
P17568		NDUFB7	NADH dehydrogenase [ubiquinone] 1 beta subcomplex subunit 7 OS=Homo sapiens GN=NDUFB7 PE=1 SV=4	29.927	4	9	4	137	16.391	8.92	92.9	124.9	100.7	110.2	83.3	88	106.167	93.8333	1.13144	0.386904
B3KTN5			cDNA FLJ38538 fis, clone HCHON2001407, highly similar to LanC-like protein 2 OS=Homo sapiens PE=2 SV=1	10.2222	3	4	3	450	50.82	7.59	102.5	114.2	101.8	97.1	88	96.4	106.167	93.8333	1.13144	0.0681756
Q05209		PTPN12	Tyrosine-protein phosphatase non-receptor type 12 OS=Homo sapiens GN=PTPN12 PE=1 SV=3	10.2564	5	5	5	780	88.051	5.62	103.5	101.9	113.1	83.8	95	102.8	106.167	93.8667	1.13104	0.132708
A0A0A0MQS1		PYCR3	Pyrroline-5-carboxylate reductase OS=Homo sapiens GN=PYCR3 PE=1 SV=1	22.7273	4	4	4	286	29.874	8.1	100	111.1	107.4	81.5	85.5	114.6	106.167	93.8667	1.13104	0.323369
Q5K651		SAMD9	Sterile alpha motif domain-containing protein 9 OS=Homo sapiens GN=SAMD9 PE=1 SV=1	1.57332	2	2	2	1589	184.165	7.83	118.2	97.2	103.1	80.3	84.4	116.9	106.167	93.8667	1.13104	0.402819
Q9BY44		EIF2A	Eukaryotic translation initiation factor 2A OS=Homo sapiens GN=EIF2A PE=1 SV=3	54.0171	20	37	20	585	64.949	8.87	106.9	100.1	111.4	85.3	93.6	102.7	106.133	93.8667	1.13068	0.110511
O15143		ARPC1B	Actin-related protein 2/3 complex subunit 1B OS=Homo sapiens GN=ARPC1B PE=1 SV=3	45.4301	15	41	14	372	40.923	8.35	108.4	102.9	107.1	92.7	89.4	99.5	106.133	93.8667	1.13068	0.0227114
H9ZYJ2		TXN	Thioredoxin OS=Homo sapiens GN=TXN PE=2 SV=1	65.7143	8	27	8	105	11.73	4.92	98.6	104.1	115.7	78.5	104.5	98.6	106.133	93.8667	1.13068	0.259565
A0A024R0L6		PAFAH1B3	Platelet-activating factor acetylhydrolase, isoform Ib, gamma subunit 29kDa, isoform CRA_a OS=Homo sapiens GN=PAFAH1B3 PE=4 SV=1	35.9307	7	14	7	231	25.718	6.84	99.7	110.7	108	82.8	94.3	104.5	106.133	93.8667	1.13068	0.158575
P22681		CBL	E3 ubiquitin-protein ligase CBL OS=Homo sapiens GN=CBL PE=1 SV=2	10.1545	5	5	5	906	99.569	6.54	103.3	108.2	106.9	89.7	87.1	104.8	106.133	93.8667	1.13068	0.0981401
Q9BU76		MMTAG2	Multiple myeloma tumor-associated protein 2 OS=Homo sapiens GN=MMTAG2 PE=1 SV=1	10.6464	2	3	2	263	29.394	10.02	104.7	116.1	97.6	115.9	74.9	90.8	106.133	93.8667	1.13068	0.401911
A0A024RDG9		BDH2	3-hydroxybutyrate dehydrogenase, type 2, isoform CRA_b OS=Homo sapiens GN=BDH2 PE=4 SV=1	22.0408	4	6	4	245	26.707	7.65	102	110.8	105.5	85.7	97.4	98.5	106.1	93.8667	1.13033	0.0644323
A0A0C4DG91		NME6	Nucleoside diphosphate kinase OS=Homo sapiens GN=NME6 PE=1 SV=1	7.73196	2	2	2	194	21.989	7.96	83.4	139	95.9	97.9	79.2	104.5	106.1	93.8667	1.13033	0.543908
Q5VXV3		SET	SET OS=Homo sapiens GN=SET PE=2 SV=1	36.5517	8	25	8	290	33.469	4.32	110.4	104.4	103.5	89.4	96.5	95.8	106.1	93.9	1.12993	0.0175641
O95169		NDUFB8	NADH dehydrogenase [ubiquinone] 1 beta subcomplex subunit 8, mitochondrial OS=Homo sapiens GN=NDUFB8 PE=1 SV=1	38.7097	6	9	6	186	21.751	6.8	110.5	107.5	100.3	104.3	85.3	92.1	106.1	93.9	1.12993	0.126148
B4E184			cDNA FLJ53267, highly similar to Optineurin OS=Homo sapiens PE=2 SV=1	1.53846	1	1	1	520	59.576	5.27	106.4	102.4	109.5	83.5	90	108.2	106.1	93.9	1.12993	0.187017
O75928		PIAS2	E3 SUMO-protein ligase PIAS2 OS=Homo sapiens GN=PIAS2 PE=1 SV=3	1.93237	1	1	1	621	68.197	7.52	105.2	111.2	101.9	96.7	90.7	94.3	106.1	93.9	1.12993	0.0195368
B2RDW0			cDNA, FLJ96792, highly similar to Homo sapiens calmodulin 2 (phosphorylase kinase, delta) (CALM2), mRNA OS=Homo sapiens PE=2 SV=1	61.0738	12	54	12	149	16.767	4.22	103.1	111.3	103.8	90.8	94.5	96.4	106.067	93.9	1.12957	0.0171233
Q9BTE1		DCTN5	Dynactin subunit 5 OS=Homo sapiens GN=DCTN5 PE=1 SV=1	17.033	3	4	3	182	20.113	8.02	104.6	107.6	106.1	85.9	93.3	102.6	106.1	93.9333	1.12952	0.0682982
V9HWD6		HEL-S-1	Epididymis secretory protein Li 1 OS=Homo sapiens GN=HEL-S-1 PE=2 SV=1	64.6341	16	83	8	246	28.065	4.83	102.2	107.1	108.9	81.8	102.5	97.5	106.067	93.9333	1.12917	0.13758
O75962		TRIO	Triple functional domain protein OS=Homo sapiens GN=TRIO PE=1 SV=2	6.39328	16	20	16	3097	346.683	6.37	108	102.5	107.7	88.3	94.4	99.1	106.067	93.9333	1.12917	0.0280416
A0A024R6B7		CHURC1	Churchill domain containing 1, isoform CRA_b OS=Homo sapiens GN=CHURC1 PE=4 SV=1	9.35252	1	1	1	139	16.101	5.54	106.6	102.7	108.9	82.1	82	117.7	106.067	93.9333	1.12917	0.369885
Q15773		MLF2	Myeloid leukemia factor 2 OS=Homo sapiens GN=MLF2 PE=1 SV=1	33.0645	6	8	6	248	28.129	6.9	105.7	109.5	103	98	92.8	91	106.067	93.9333	1.12917	0.0126372
B3VL31			Beta globin (Fragment) OS=Homo sapiens PE=3 SV=1	18.0952	3	6	3	105	11.492	6.68	123	97.1	98	92.1	95.1	94.6	106.033	93.9333	1.12881	0.229385
P54578		USP14	Ubiquitin carboxyl-terminal hydrolase 14 OS=Homo sapiens GN=USP14 PE=1 SV=3	51.6194	19	36	19	494	56.033	5.3	106.5	101.8	109.8	82	97.6	102.2	106.033	93.9333	1.12881	0.137898
P55060		CSE1L	Exportin-2 OS=Homo sapiens GN=CSE1L PE=1 SV=3	38.105	38	114	38	971	110.346	5.77	104.4	101.1	112.6	79.4	100.1	102.4	106.033	93.9667	1.12841	0.209314
P12004		PCNA	Proliferating cell nuclear antigen OS=Homo sapiens GN=PCNA PE=1 SV=1	67.0498	12	79	12	261	28.75	4.69	105.8	104	108.3	81.2	101.6	99.1	106.033	93.9667	1.12841	0.138958
B4DSI9			cDNA FLJ56483, highly similar to Eukaryotic translation initiation factor 4 gamma 1 OS=Homo sapiens PE=2 SV=1	27.0503	36	96	31	1512	166.479	5.22	105.9	100.6	111.6	84.3	94.9	102.7	106.033	93.9667	1.12841	0.123773
A8K0J3			cDNA FLJ76732, highly similar to Homo sapiens TAO kinase 3 (TAOK3), mRNA OS=Homo sapiens PE=2 SV=1	5.34521	4	5	2	898	105.265	7.37	100.9	104.6	112.6	82.7	95.3	103.9	106.033	93.9667	1.12841	0.16252
Q9NSY1		BMP2K	BMP-2-inducible protein kinase OS=Homo sapiens GN=BMP2K PE=1 SV=2	1.29199	1	1	1	1161	129.091	6.51	94.9	120.1	103.1	88.9	92.2	100.8	106.033	93.9667	1.12841	0.216258
A8KA33			cDNA FLJ76690, highly similar to Homo sapiens neuronal protein isoform a mRNA OS=Homo sapiens PE=2 SV=1	3.59195	2	2	2	696	77.089	5.83	99.4	108.8	109.9	85.7	91.4	104.8	106.033	93.9667	1.12841	0.14009
A4D0Z4		GCC1	GRIP and coiled-coil domain containing 1 OS=Homo sapiens GN=GCC1 PE=4 SV=1	9.93548	6	7	6	775	87.757	5.45	105.3	110.1	102.6	90.6	84.8	106.5	106	93.9667	1.12806	0.153682
Q9NXV2		KCTD5	BTB/POZ domain-containing protein KCTD5 OS=Homo sapiens GN=KCTD5 PE=1 SV=1	21.3675	3	3	3	234	26.076	6.24	105.6	103.8	108.6	93.7	85.3	102.9	106	93.9667	1.12806	0.0845422
Q8WVX3		C4orf3	Uncharacterized protein C4orf3 OS=Homo sapiens GN=C4orf3 PE=1 SV=2	24.2424	1	3	1	66	7.599	5.29	109.3	108	100.7	108.6	87	86.4	106	94	1.12766	0.197703
Q13049		TRIM32	E3 ubiquitin-protein ligase TRIM32 OS=Homo sapiens GN=TRIM32 PE=1 SV=2	21.1332	10	15	10	653	71.942	6.98	101.4	110.5	106	90	90.2	101.8	105.967	94	1.1273	0.063663
P35611		ADD1	Alpha-adducin OS=Homo sapiens GN=ADD1 PE=1 SV=2	10.9905	6	8	5	737	80.905	5.83	100.5	108.2	109.3	87.3	91.6	103.2	106	94.0333	1.12726	0.0950461
Q9BR76		CORO1B	Coronin-1B OS=Homo sapiens GN=CORO1B PE=1 SV=1	34.9693	12	21	12	489	54.2	5.88	110.6	106.3	101.1	97	88	97.1	106	94.0333	1.12726	0.0426783
Q86TN4		TRPT1	tRNA 2'-phosphotransferase 1 OS=Homo sapiens GN=TRPT1 PE=1 SV=2	3.55731	1	1	1	253	27.725	9.98	103.8	113.9	100.3	102.7	91	88.4	106	94.0333	1.12726	0.116724
Q8WUH6		TMEM263	Transmembrane protein 263 OS=Homo sapiens GN=TMEM263 PE=1 SV=1	37.069	3	6	3	116	11.741	9.32	105.3	109.8	102.8	94	92.6	95.5	105.967	94.0333	1.12691	0.00571738
Q96EI5		TCEAL4	Transcription elongation factor A protein-like 4 OS=Homo sapiens GN=TCEAL4 PE=1 SV=2	16.7442	2	2	2	215	24.632	5.2	104	110.8	103.1	89.5	86.7	105.9	105.967	94.0333	1.12691	0.138548
Q9BUP0		EFHD1	EF-hand domain-containing protein D1 OS=Homo sapiens GN=EFHD1 PE=1 SV=1	34.728	7	15	5	239	26.911	5.39	102.1	111.5	104.3	104.9	86.8	90.5	105.967	94.0667	1.12651	0.127728
Q14444		CAPRIN1	Caprin-1 OS=Homo sapiens GN=CAPRIN1 PE=1 SV=2	27.0804	16	43	16	709	78.318	5.25	108.2	96.7	112.9	93.6	96.3	92.3	105.933	94.0667	1.12615	0.0747311
D3DUK1		BCAR1	Breast cancer anti-estrogen resistance 1, isoform CRA_a OS=Homo sapiens GN=BCAR1 PE=4 SV=1	12.7252	6	8	6	888	95.147	5.74	105.7	107.6	104.5	90.2	91.3	100.7	105.933	94.0667	1.12615	0.0263485
Q9BQC3		DPH2	2-(3-amino-3-carboxypropyl)histidine synthase subunit 2 OS=Homo sapiens GN=DPH2 PE=1 SV=1	11.0429	3	4	3	489	52.05	5.53	97.2	106.6	114	87.8	88.1	106.3	105.933	94.0667	1.12615	0.20345
B4DJ79			cDNA FLJ55847 OS=Homo sapiens PE=2 SV=1	12.8571	1	4	1	210	22.581	4.94	108.5	100.5	108.8	107.8	83.6	90.8	105.933	94.0667	1.12615	0.196826
A0A024RC16		CD99L2	CD99 antigen-like 2, isoform CRA_d OS=Homo sapiens GN=CD99L2 PE=2 SV=1	12.9771	2	3	2	262	27.969	5.14	93	123.1	101.7	89.8	82.5	109.9	105.933	94.0667	1.12615	0.383262
Q9BQI0		AIF1L	Allograft inflammatory factor 1-like OS=Homo sapiens GN=AIF1L PE=1 SV=1	27.3333	5	7	5	150	17.057	7.2	98.7	113.7	105.3	92.7	88	101.5	105.9	94.0667	1.1258	0.114172
A0A024R829		POLE3	Polymerase (DNA directed), epsilon 3 (P17 subunit), isoform CRA_a OS=Homo sapiens GN=POLE3 PE=4 SV=1	31.2925	4	9	4	147	16.849	4.74	108.6	102	107.2	100.1	92.8	89.4	105.933	94.1	1.12575	0.0340786
Q9NP77		SSU72	RNA polymerase II subunit A C-terminal domain phosphatase SSU72 OS=Homo sapiens GN=SSU72 PE=1 SV=1	24.2268	4	4	4	194	22.56	5.33	114	105.7	98	95.8	87.9	98.6	105.9	94.1	1.1254	0.103782
Q53EN2			MURR1 variant (Fragment) OS=Homo sapiens PE=2 SV=1	8.94737	1	2	1	190	21.294	6.2	109.4	105.9	102.4	80.2	107.1	95	105.9	94.1	1.1254	0.215944
A0A024R3L9		VPS26B	Vacuolar protein sorting 26 homolog B (Yeast), isoform CRA_a OS=Homo sapiens GN=VPS26B PE=4 SV=1	26.7857	5	7	5	336	39.13	7.36	101	110.6	106.1	82.6	95.5	104.2	105.9	94.1	1.1254	0.16053
Q9BZZ2		SIGLEC1	Sialoadhesin OS=Homo sapiens GN=SIGLEC1 PE=1 SV=2	0.409596	1	1	1	1709	182.51	6.62	93.7	113	111	85.3	86.2	110.8	105.9	94.1	1.1254	0.318294
Q99543		DNAJC2	DnaJ homolog subfamily C member 2 OS=Homo sapiens GN=DNAJC2 PE=1 SV=4	18.3575	10	15	10	621	71.952	8.7	105.1	105.2	107.3	84	98.2	100.1	105.867	94.1	1.12504	0.0835199
I6TRR8			SND1-BRAF fusion OS=Homo sapiens PE=2 SV=1	38.5087	36	104	5	979	109.079	9.29	103.5	101.4	112.7	91.1	92.9	98.3	105.867	94.1	1.12504	0.0451248
E3W994		CLASP2	CLIP-associating protein 2 OS=Homo sapiens GN=CLASP2 PE=1 SV=2	10.3692	10	13	1	1273	138.778	8.34	105.6	101	111	68.7	100.2	113.4	105.867	94.1	1.12504	0.434821
Q96E14		RMI2	RecQ-mediated genome instability protein 2 OS=Homo sapiens GN=RMI2 PE=1 SV=2	23.1293	2	2	2	147	15.855	7.9	109.2	107.1	101.3	89.7	90.6	102	105.867	94.1	1.12504	0.0631391
Q6P2E9		EDC4	Enhancer of mRNA-decapping protein 4 OS=Homo sapiens GN=EDC4 PE=1 SV=1	26.6952	23	33	23	1401	151.567	5.86	105.7	105.3	106.7	89	93.7	99.7	105.9	94.1333	1.125	0.019669
P53367		ARFIP1	Arfaptin-1 OS=Homo sapiens GN=ARFIP1 PE=1 SV=2	31.3673	8	11	7	373	41.713	6.7	112.3	104.9	100.4	91.1	89.5	101.8	105.867	94.1333	1.12465	0.0866324
P55263		ADK	Adenosine kinase OS=Homo sapiens GN=ADK PE=1 SV=2	30.3867	7	10	7	362	40.52	6.7	98.4	110.6	108.6	101.3	84.4	96.7	105.867	94.1333	1.12465	0.136123
Q12904		AIMP1	Aminoacyl tRNA synthase complex-interacting multifunctional protein 1 OS=Homo sapiens GN=AIMP1 PE=1 SV=2	73.0769	15	33	15	312	34.331	8.43	105.3	105.2	107	92	94.4	96	105.833	94.1333	1.12429	0.000845966
P83731		RPL24	60S ribosomal protein L24 OS=Homo sapiens GN=RPL24 PE=1 SV=1	47.1338	10	44	10	157	17.768	11.25	101.2	107.6	108.8	104.6	88.2	89.7	105.867	94.1667	1.12425	0.111225
B7ZB83			cDNA, FLJ79447, highly similar to Nucleosome assembly protein 1-like 4 OS=Homo sapiens PE=2 SV=1	36.7876	11	20	9	386	44.052	4.67	106	99.7	111.9	76.7	99.2	106.6	105.867	94.1667	1.12425	0.292324
Q13546		RIPK1	Receptor-interacting serine/threonine-protein kinase 1 OS=Homo sapiens GN=RIPK1 PE=1 SV=3	12.6677	6	7	6	671	75.883	6.33	104.2	103	110.4	91.3	91.8	99.4	105.867	94.1667	1.12425	0.0283057
Q15046		KARS	Lysine--tRNA ligase OS=Homo sapiens GN=KARS PE=1 SV=3	62.1441	35	94	35	597	68.005	6.35	107.3	102.4	107.8	91.3	92.4	98.8	105.833	94.1667	1.12389	0.0159054
Q16864		ATP6V1F	V-type proton ATPase subunit F OS=Homo sapiens GN=ATP6V1F PE=1 SV=2	31.9328	3	4	3	119	13.362	5.52	98.5	113.2	105.8	89.2	91.5	101.8	105.833	94.1667	1.12389	0.112158
J3KR97		TBCD	Tubulin-specific chaperone D OS=Homo sapiens GN=TBCD PE=1 SV=1	3.57724	2	2	2	1230	136.464	6.34	109.8	99.1	108.6	80.9	102.8	98.8	105.833	94.1667	1.12389	0.196501
A0A090N7Y2		ABCF2	ATP-binding cassette, sub-family F (GCN20), member 2 OS=Homo sapiens GN=ABCF2 PE=4 SV=1	42.1136	25	47	25	634	72.397	7.49	108.8	100.2	108.4	87.8	92.2	102.5	105.8	94.1667	1.12354	0.0880334
Q53EL1			Protein KIAA0196 variant (Fragment) OS=Homo sapiens PE=2 SV=1	6.4433	5	5	5	1164	134.757	7.06	101.7	110.3	105.4	83.7	92.8	106	105.8	94.1667	1.12354	0.168811
Q969T4		UBE2E3	Ubiquitin-conjugating enzyme E2 E3 OS=Homo sapiens GN=UBE2E3 PE=1 SV=1	8.69565	1	2	1	207	22.898	7.18	112.3	109.5	95.7	87.1	93.3	102.2	105.833	94.2	1.1235	0.159779
A0A087WV05			Uncharacterized protein OS=Homo sapiens PE=4 SV=1	19.0909	3	3	3	110	12.747	6.02	107.7	109.2	100.4	89.4	92.2	100.9	105.767	94.1667	1.12319	0.0578639
Q9BV44		THUMPD3	THUMP domain-containing protein 3 OS=Homo sapiens GN=THUMPD3 PE=1 SV=1	6.1144	2	2	2	507	56.967	6.37	87.1	116.5	113.8	76.8	80.1	125.7	105.8	94.2	1.12314	0.561771
P35580		MYH10	Myosin-10 OS=Homo sapiens GN=MYH10 PE=1 SV=3	45.5972	81	174	56	1976	228.858	5.54	105.6	103.2	108.6	92.1	90.5	100	105.8	94.2	1.12314	0.0251798
Q6IAX2		RPL21	RPL21 protein OS=Homo sapiens GN=RPL21 PE=2 SV=1	47.5	10	42	10	160	18.553	10.49	106.7	103.2	107.5	103.4	89.8	89.4	105.8	94.2	1.12314	0.0725148
A0A0A0MTH3		ILK	Integrin-linked protein kinase OS=Homo sapiens GN=ILK PE=1 SV=1	22.9814	9	13	9	483	54.577	7.97	106.5	102.4	108.5	84.7	91.8	106.1	105.8	94.2	1.12314	0.150988
Q93034		CUL5	Cullin-5 OS=Homo sapiens GN=CUL5 PE=1 SV=4	15.5128	11	13	11	780	90.897	7.94	107.6	104.2	105.6	91	96.6	95	105.8	94.2	1.12314	0.00389947
A0A024R3Z5		LANCL1	LanC lantibiotic synthetase component C-like 1 (Bacterial), isoform CRA_b OS=Homo sapiens GN=LANCL1 PE=4 SV=1	20.9246	5	8	5	411	46.455	7.87	100.2	113.1	104.1	83.3	94.9	104.4	105.8	94.2	1.12314	0.182357
A0A0G2JMZ8		OCLN	Occludin OS=Homo sapiens GN=OCLN PE=1 SV=1	16.4751	5	5	5	522	59.092	5.95	104.3	107.7	105.3	92.6	91.4	98.6	105.767	94.2	1.12279	0.00909844
P84085		ARF5	ADP-ribosylation factor 5 OS=Homo sapiens GN=ARF5 PE=1 SV=2	81.1111	13	58	7	180	20.517	6.79	98	113.5	105.9	92.2	94.2	96.3	105.8	94.2333	1.12274	0.0668432
Q96J02		ITCH	E3 ubiquitin-protein ligase Itchy homolog OS=Homo sapiens GN=ITCH PE=1 SV=2	27.1318	18	23	18	903	102.738	6.3	105	105.2	107.1	92.2	89.8	100.7	105.767	94.2333	1.12239	0.026816
A8K4P8			cDNA FLJ75337 OS=Homo sapiens PE=2 SV=1	2.09974	3	3	3	1524	170.406	7.31	105.1	109.6	102.6	106.9	84	91.8	105.767	94.2333	1.12239	0.176071
A0A140VK92			Secretory carrier-associated membrane protein OS=Homo sapiens PE=2 SV=1	9.72644	2	4	2	329	36.625	6.1	105.9	98.3	113	117.8	89.7	75.2	105.733	94.2333	1.12204	0.432978
Q8N584		TTC39C	Tetratricopeptide repeat protein 39C OS=Homo sapiens GN=TTC39C PE=2 SV=2	3.94511	2	2	2	583	65.828	6.99	111.1	99.9	106.2	84.6	93	105.1	105.733	94.2333	1.12204	0.164883
O75146		HIP1R	Huntingtin-interacting protein 1-related protein OS=Homo sapiens GN=HIP1R PE=1 SV=2	6.83521	7	8	5	1068	119.315	6.67	105	112.9	99.3	89.8	90.3	102.6	105.733	94.2333	1.12204	0.116142
A0A087X2I1		PSMC6	26S protease regulatory subunit 10B OS=Homo sapiens GN=PSMC6 PE=1 SV=1	54.5906	19	50	19	403	45.768	7.78	104.8	105.7	106.7	89.7	94.6	98.4	105.733	94.2333	1.12204	0.0111421
Q7LGC8		CHST3	Carbohydrate sulfotransferase 3 OS=Homo sapiens GN=CHST3 PE=1 SV=3	2.71399	1	1	1	479	54.671	8.59	100.7	114.6	101.9	95.4	87.8	99.6	105.733	94.2667	1.12164	0.111368
B2RDF5			cDNA, FLJ96587, highly similar to Homo sapiens SUMO-1 activating enzyme subunit 2 (UBA2), mRNA OS=Homo sapiens PE=2 SV=1	18.125	9	14	9	640	71.135	5.29	105.8	107.5	103.9	81.8	95.7	105.3	105.733	94.2667	1.12164	0.171901
A8K4U4			cDNA FLJ77113 OS=Homo sapiens PE=2 SV=1	5.37634	3	3	3	837	95.543	6.29	106.2	102.9	108.1	89.8	94.3	98.7	105.733	94.2667	1.12164	0.0184325
A8K5Y7			cDNA FLJ78655, highly similar to Homo sapiens exportin 5 (XPO5), mRNA OS=Homo sapiens PE=2 SV=1	15.4485	13	24	13	1204	136.221	5.9	104.5	104	108.7	85.3	93	104.5	105.733	94.2667	1.12164	0.118013
P42766		RPL35	60S ribosomal protein L35 OS=Homo sapiens GN=RPL35 PE=1 SV=2	43.0894	7	26	7	123	14.543	11.05	105.3	106.3	105.6	103	90	89.8	105.733	94.2667	1.12164	0.0588177
O75942		PRNP	Major prion protein OS=Homo sapiens GN=PRNP PE=3 SV=2	4.21053	1	1	1	285	30.749	9	101.8	115.3	100.1	102.2	85.1	95.5	105.733	94.2667	1.12164	0.172792
Q8TE68		EPS8L1	Epidermal growth factor receptor kinase substrate 8-like protein 1 OS=Homo sapiens GN=EPS8L1 PE=1 SV=3	1.38313	1	1	1	723	80.202	6.04	94.9	125.5	96.8	75.9	98.4	108.5	105.733	94.2667	1.12164	0.453152
Q13564		NAE1	NEDD8-activating enzyme E1 regulatory subunit OS=Homo sapiens GN=NAE1 PE=1 SV=1	17.4157	7	9	7	534	60.209	5.4	101.5	107.7	107.9	87.6	89	106.2	105.7	94.2667	1.12129	0.145599
Q16643		DBN1	Drebrin OS=Homo sapiens GN=DBN1 PE=1 SV=4	51.4638	24	61	24	649	71.385	4.45	107.1	107.8	102.2	97.7	86.3	98.8	105.7	94.2667	1.12129	0.0589172
O00273		DFFA	DNA fragmentation factor subunit alpha OS=Homo sapiens GN=DFFA PE=1 SV=1	48.6405	12	18	12	331	36.5	4.79	103.5	106.7	107	90.1	95.8	97	105.733	94.3	1.12124	0.00894578
P78318		IGBP1	Immunoglobulin-binding protein 1 OS=Homo sapiens GN=IGBP1 PE=1 SV=1	24.4838	8	8	8	339	39.198	5.38	98.1	112.4	106.7	80.5	90	112.4	105.733	94.3	1.12124	0.330434
Q13867		BLMH	Bleomycin hydrolase OS=Homo sapiens GN=BLMH PE=1 SV=1	13.8462	5	6	5	455	52.528	6.27	95.6	102.7	118.9	88.2	95.1	99.6	105.733	94.3	1.12124	0.20937
Q9NWM8		FKBP14	Peptidyl-prolyl cis-trans isomerase FKBP14 OS=Homo sapiens GN=FKBP14 PE=1 SV=1	10.9005	2	2	2	211	24.156	6.07	113.5	98	105.7	95.2	90.8	96.9	105.733	94.3	1.12124	0.0770409
O43776		NARS	Asparagine--tRNA ligase, cytoplasmic OS=Homo sapiens GN=NARS PE=1 SV=1	32.6642	16	33	16	548	62.903	6.25	103.4	105.4	108.3	79.8	100.3	102.8	105.7	94.3	1.12089	0.199415
F5GWE5		PITPNA	Phosphatidylinositol transfer protein alpha isoform OS=Homo sapiens GN=PITPNA PE=1 SV=1	27.4074	6	11	4	270	31.782	6.55	102	105	110.1	85.7	92.7	104.5	105.7	94.3	1.12089	0.128982
B2RBY4			DNA primase OS=Homo sapiens PE=2 SV=1	15.2381	5	10	5	420	49.924	8.38	109	99.3	108.8	86.4	90.9	105.6	105.7	94.3	1.12089	0.160271
Q9Y5Q0		FADS3	Fatty acid desaturase 3 OS=Homo sapiens GN=FADS3 PE=2 SV=1	9.88764	3	4	3	445	51.112	7.77	94.5	114.7	107.9	101.5	85.6	95.8	105.7	94.3	1.12089	0.205061
F2Z2X0		NME4	Nucleoside diphosphate kinase OS=Homo sapiens GN=NME4 PE=1 SV=1	15.8798	3	3	3	233	25.444	11.05	103	108.9	105.2	106.3	87.9	88.7	105.7	94.3	1.12089	0.142038
A0A140VJJ2		ESD	S-formylglutathione hydrolase OS=Homo sapiens GN=ESD PE=2 SV=1	24.4681	5	12	5	282	31.442	7.02	107.7	99.6	109.8	78.4	100.7	103.8	105.7	94.3	1.12089	0.254841
Q9H840		GEMIN7	Gem-associated protein 7 OS=Homo sapiens GN=GEMIN7 PE=1 SV=1	20.6107	1	1	1	131	14.528	7.4	75.9	133.2	108	96.5	66.6	119.9	105.7	94.3333	1.12049	0.642089
D3DNI2		PFN2	Profilin (Fragment) OS=Homo sapiens GN=PFN2 PE=3 SV=1	18.5629	7	15	2	334	34.922	10.29	110.4	106.3	100.3	80.8	103.3	98.9	105.667	94.3333	1.12014	0.204479
Q9NP79		VTA1	Vacuolar protein sorting-associated protein VTA1 homolog OS=Homo sapiens GN=VTA1 PE=1 SV=1	33.2248	7	11	7	307	33.858	6.29	103.4	103.3	110.3	93.3	94.5	95.2	105.667	94.3333	1.12014	0.00892339
A8K0C2			cDNA FLJ75950 OS=Homo sapiens PE=2 SV=1	21.2454	3	3	3	273	28.791	8.91	93.7	116.9	106.4	81.8	90.1	111.1	105.667	94.3333	1.12014	0.361103
B7Z6G2			cDNA FLJ56152, highly similar to Rho guanine nucleotide exchange factor 7 OS=Homo sapiens PE=2 SV=1	14.4244	7	8	7	721	81.353	7.68	103.9	104.6	108.5	83.6	92.5	106.9	105.667	94.3333	1.12014	0.177674
A0A024R1I5		SEC14L2	SEC14-like 2 (S. cerevisiae), isoform CRA_b OS=Homo sapiens GN=SEC14L2 PE=4 SV=1	5.7072	2	2	2	403	46.116	7.84	109.6	105.3	102.1	85.5	94.1	103.4	105.667	94.3333	1.12014	0.11332
Q9NZU5		LMCD1	LIM and cysteine-rich domains protein 1 OS=Homo sapiens GN=LMCD1 PE=1 SV=1	4.10959	1	1	1	365	40.806	7.93	80.8	128.8	107.4	94.8	82.5	105.7	105.667	94.3333	1.12014	0.503019
P17858		PFKL	ATP-dependent 6-phosphofructokinase, liver type OS=Homo sapiens GN=PFKL PE=1 SV=6	35.1282	21	33	16	780	84.964	7.5	99.7	110	107.2	84.2	95.7	103.1	105.633	94.3333	1.11979	0.147319
A8K4T9			cDNA FLJ77421, highly similar to Homo sapiens autoantigen p542 mRNA OS=Homo sapiens PE=2 SV=1	65.6357	17	48	1	291	30.38	9.47	110	101.1	105.8	107	86.1	90	105.633	94.3667	1.11939	0.178431
Q6PKG0		LARP1	La-related protein 1 OS=Homo sapiens GN=LARP1 PE=1 SV=2	25.1825	17	24	15	1096	123.434	8.82	104.4	100.9	111.6	90	97.6	95.5	105.633	94.3667	1.11939	0.043956
Q15008		PSMD6	26S proteasome non-ATPase regulatory subunit 6 OS=Homo sapiens GN=PSMD6 PE=1 SV=1	45.7584	16	27	16	389	45.502	5.62	104.4	106.4	106.1	87.7	92.9	102.5	105.633	94.3667	1.11939	0.0618042
Q96N67		DOCK7	Dedicator of cytokinesis protein 7 OS=Homo sapiens GN=DOCK7 PE=1 SV=4	7.8972	11	13	11	2140	242.407	6.8	105.3	104.3	107.3	91.6	93.6	97.9	105.633	94.3667	1.11939	0.0054107
Q5T5H1		ENSA	Alpha-endosulfine OS=Homo sapiens GN=ENSA PE=1 SV=1	28.3422	4	6	3	187	20.981	7.87	102	109.9	105	88.5	95	99.6	105.633	94.3667	1.11939	0.0465711
O94855		SEC24D	Protein transport protein Sec24D OS=Homo sapiens GN=SEC24D PE=1 SV=2	19.186	13	22	12	1032	112.936	7.25	107	105.6	104.2	91.1	90.9	101.1	105.6	94.3667	1.11904	0.0315547
Q9Y3Z3		SAMHD1	Deoxynucleoside triphosphate triphosphohydrolase SAMHD1 OS=Homo sapiens GN=SAMHD1 PE=1 SV=2	27.1565	14	16	14	626	72.155	7.14	108.9	105.6	102.3	87.5	94.8	100.8	105.6	94.3667	1.11904	0.0589526
Q7Z5K2		WAPL	Wings apart-like protein homolog OS=Homo sapiens GN=WAPL PE=1 SV=1	11.1765	9	10	9	1190	132.863	5.44	106.7	105.3	104.8	88.8	90.6	103.7	105.6	94.3667	1.11904	0.0764033
O60927		PPP1R11	Protein phosphatase 1 regulatory subunit 11 OS=Homo sapiens GN=PPP1R11 PE=1 SV=1	32.5397	2	2	2	126	13.944	7.01	116.5	106.3	94.1	95.3	89.1	98.8	105.633	94.4	1.119	0.187228
O75419		CDC45	Cell division control protein 45 homolog OS=Homo sapiens GN=CDC45 PE=1 SV=1	3.18021	1	1	1	566	65.527	5.53	109.5	104	103.4	126.4	68.6	88.2	105.633	94.4	1.119	0.546697
B2R665			cDNA, FLJ92810, highly similar to Homo sapiens protein phosphatase 1G (formerly 2C), magnesium-dependent, gamma isoform (PPM1G), mRNA OS=Homo sapiens PE=2 SV=1	34.9817	14	25	14	546	59.205	4.36	108.1	104.1	104.7	86.7	91.9	104.6	105.633	94.4	1.119	0.108787
Q502W7		CCDC38	Coiled-coil domain-containing protein 38 OS=Homo sapiens GN=CCDC38 PE=2 SV=1	3.19716	1	1	1	563	65.274	8.75	85.9	147	83.9	76.8	73.6	132.8	105.6	94.4	1.11864	0.712049
Q9Y4E8		USP15	Ubiquitin carboxyl-terminal hydrolase 15 OS=Homo sapiens GN=USP15 PE=1 SV=3	8.46075	5	9	5	981	112.348	5.22	102.1	105.1	109.5	81	100.4	101.8	105.567	94.4	1.11829	0.188273
Q96BH1		RNF25	E3 ubiquitin-protein ligase RNF25 OS=Homo sapiens GN=RNF25 PE=1 SV=1	9.15033	2	4	2	459	51.187	6.54	108.9	100.4	107.4	82.6	99.7	100.9	105.567	94.4	1.11829	0.159174
F5H5X6		NOP2	Probable 28S rRNA (cytosine(4447)-C(5))-methyltransferase (Fragment) OS=Homo sapiens GN=NOP2 PE=1 SV=1	23.2	9	13	1	250	27.408	4.89	104.7	101.9	110.2	108.7	74.5	100.1	105.6	94.4333	1.11825	0.3498
Q8WXD5		GEMIN6	Gem-associated protein 6 OS=Homo sapiens GN=GEMIN6 PE=1 SV=1	13.7725	2	2	2	167	18.812	5.12	109	100.9	106.9	100.1	91.1	92.1	105.6	94.4333	1.11825	0.040566
A0A087X1Z3		PSME2	Proteasome activator complex subunit 2 OS=Homo sapiens GN=PSME2 PE=1 SV=1	17.7165	5	10	5	254	29.108	6.71	104.7	107.3	104.8	85.9	93.2	104.2	105.6	94.4333	1.11825	0.106842
Q8N4C8		MINK1	Misshapen-like kinase 1 OS=Homo sapiens GN=MINK1 PE=1 SV=2	11.5616	11	11	6	1332	149.729	7.85	95.3	110.7	110.8	91.3	91.2	100.8	105.6	94.4333	1.11825	0.138898
Q9BYX2		TBC1D2	TBC1 domain family member 2A OS=Homo sapiens GN=TBC1D2 PE=1 SV=3	23.2759	15	24	15	928	105.348	6.58	103.2	107	106.6	88.2	95.5	99.6	105.6	94.4333	1.11825	0.0345179
Q6IN85		PPP4R3A	Serine/threonine-protein phosphatase 4 regulatory subunit 3A OS=Homo sapiens GN=PPP4R3A PE=1 SV=1	11.4046	9	11	9	833	95.308	4.94	105.9	106.8	104.1	91.8	92.9	98.6	105.6	94.4333	1.11825	0.00771298
A0A0S2Z5S7		MIF4GD	MIF4G domain containing isoform 2 (Fragment) OS=Homo sapiens GN=MIF4GD PE=2 SV=1	13.6882	3	3	3	263	30.072	5.27	106.6	105.3	104.9	89.2	95.1	99	105.6	94.4333	1.11825	0.0181786
Q9NZ63		C9orf78	Uncharacterized protein C9orf78 OS=Homo sapiens GN=C9orf78 PE=1 SV=1	40.4844	8	11	8	289	33.667	6.74	118.9	97.9	99.8	92	94.2	97	105.533	94.4	1.11794	0.17993
Q10567		AP1B1	AP-1 complex subunit beta-1 OS=Homo sapiens GN=AP1B1 PE=1 SV=2	24.0253	22	44	9	949	104.57	5.06	100.9	110.8	105	87.8	93.6	101.9	105.567	94.4333	1.1179	0.0898939
Q5VWC4		PSMD4	26S proteasome non-ATPase regulatory subunit 4 OS=Homo sapiens GN=PSMD4 PE=1 SV=1	40	12	28	12	380	41.053	4.81	104.3	106.2	106.2	84.8	97.1	101.4	105.567	94.4333	1.1179	0.090576
Q14157		UBAP2L	Ubiquitin-associated protein 2-like OS=Homo sapiens GN=UBAP2L PE=1 SV=2	31.6467	20	45	20	1087	114.465	7.11	102.8	104.3	109.6	93.7	92.2	97.4	105.567	94.4333	1.1179	0.0124489
A4D0W0		LSM8	LSM8 homolog, U6 small nuclear RNA associated (S. cerevisiae) OS=Homo sapiens GN=LSM8 PE=2 SV=1	79.1667	6	12	6	96	10.396	4.48	107	106.7	103	107	87.5	88.8	105.567	94.4333	1.1179	0.158141
Q7Z4F1		LRP10	Low-density lipoprotein receptor-related protein 10 OS=Homo sapiens GN=LRP10 PE=1 SV=2	2.6648	1	1	1	713	76.145	5.52	108	110.9	97.8	90.4	86.2	106.7	105.567	94.4333	1.1179	0.207261
Q9NRD1		FBXO6	F-box only protein 6 OS=Homo sapiens GN=FBXO6 PE=1 SV=1	3.75427	1	1	1	293	33.911	6.09	91.4	121.8	103.5	92.2	82.9	108.2	105.567	94.4333	1.1179	0.388487
A0A0A0MTS2		GPI	Glucose-6-phosphate isomerase (Fragment) OS=Homo sapiens GN=GPI PE=1 SV=1	48.6911	25	63	25	573	64.784	9.04	103.8	101.5	111.3	79.8	99.1	104.4	105.533	94.4333	1.11754	0.239494
Q9UPR3		SMG5	Protein SMG5 OS=Homo sapiens GN=SMG5 PE=1 SV=3	1.5748	1	1	1	1016	113.855	5.91	98.2	108.6	109.8	82.6	101.9	98.8	105.533	94.4333	1.11754	0.189319
Q16763		UBE2S	Ubiquitin-conjugating enzyme E2 S OS=Homo sapiens GN=UBE2S PE=1 SV=2	22.973	4	4	4	222	23.831	8.38	110.7	90.6	115.4	86.6	91.9	104.9	105.567	94.4667	1.1175	0.300781
Q14061		COX17	Cytochrome c oxidase copper chaperone OS=Homo sapiens GN=COX17 PE=1 SV=2	84.127	5	7	5	63	6.91	7.24	99	115.3	102.4	121.2	70	92.2	105.567	94.4667	1.1175	0.516879
Q8IYL3		C1orf174	UPF0688 protein C1orf174 OS=Homo sapiens GN=C1orf174 PE=1 SV=2	5.76132	1	1	1	243	25.961	6.9	100.4	115.3	101	101.6	84.4	97.4	105.567	94.4667	1.1175	0.193388
Q8IYB1		MB21D2	Protein MB21D2 OS=Homo sapiens GN=MB21D2 PE=1 SV=3	1.42566	1	1	1	491	55.764	7.03	104.5	105.4	106.8	93.9	87.7	101.8	105.567	94.4667	1.1175	0.0549647
Q96CN7		ISOC1	Isochorismatase domain-containing protein 1 OS=Homo sapiens GN=ISOC1 PE=1 SV=3	25.8389	5	12	5	298	32.216	7.39	101.3	109.3	106	97	92.4	94	105.533	94.4667	1.11715	0.0145802
Q9H1I8		ASCC2	Activating signal cointegrator 1 complex subunit 2 OS=Homo sapiens GN=ASCC2 PE=1 SV=3	3.56671	2	2	1	757	86.306	5.16	104.8	101.6	110.2	94.3	99.5	89.6	105.533	94.4667	1.11715	0.0437203
A0A024QZJ7		CCDC6	Coiled-coil domain containing 6, isoform CRA_a OS=Homo sapiens GN=CCDC6 PE=4 SV=1	33.7553	15	18	15	474	53.262	7.34	104	106.9	105.6	87.7	96.6	99.1	105.5	94.4667	1.1168	0.0362367
Q9UIW2		PLXNA1	Plexin-A1 OS=Homo sapiens GN=PLXNA1 PE=1 SV=3	6.69831	7	7	7	1896	210.933	6.92	103.7	106.6	106.2	94	88.9	100.5	105.5	94.4667	1.1168	0.0337598
O14777		NDC80	Kinetochore protein NDC80 homolog OS=Homo sapiens GN=NDC80 PE=1 SV=1	8.25545	4	5	4	642	73.867	5.6	112.9	96	107.6	78.7	93.2	111.6	105.5	94.5	1.1164	0.363966
Q562R1		ACTBL2	Beta-actin-like protein 2 OS=Homo sapiens GN=ACTBL2 PE=1 SV=2	28.4574	11	111	3	376	41.976	5.59	110.6	100.1	105.9	90.9	99.5	93.2	105.533	94.5333	1.11636	0.0505987
G8JLD5		DNM1L	Dynamin-1-like protein OS=Homo sapiens GN=DNM1L PE=1 SV=1	42.9775	25	36	2	712	79.572	7.08	92.3	116.7	107.4	97.9	85.9	99.7	105.467	94.5	1.11605	0.258129
A0A077GYB2		HLA-B	MHC class I antigen (Fragment) OS=Homo sapiens GN=HLA-B PE=3 SV=1	58.011	8	11	2	181	21.018	6.8	102.2	106.5	107.7	118.7	82.3	82.5	105.467	94.5	1.11605	0.420038
Q59H88			Putative uncharacterized protein (Fragment) OS=Homo sapiens PE=2 SV=1	0.628053	1	1	1	1433	160.36	6.83	107.5	106.5	102.4	95.3	93.6	94.6	105.467	94.5	1.11605	0.00257952
Q8WV99		ZFAND2B	AN1-type zinc finger protein 2B OS=Homo sapiens GN=ZFAND2B PE=1 SV=1	2.72374	1	1	1	257	28.004	6.92	109.1	106.2	101.1	93.1	92.8	97.6	105.467	94.5	1.11605	0.0174341
[truncated: 4,406 more rows]
